# Supplementary material
Source: Royal Society of Chemistry journal article supplement (doi:10.1039/d6qo00280c)
Supplement: d6qo00280c1.pdf [file d6qo00280c1.pdf]

## Supporting Information

# Access to $\alpha$ -Carbonyl Vinyl Sulfoxonium Ylides via Tandem Arrangement-Addition of Cyclic Ethyneethylene Carbonates

Songtao Li,<sup>a</sup> Yaping Tang,<sup>a</sup> Rou Wang,<sup>a</sup> Shengbiao Tang,<sup>a</sup> Lin Qiu<sup>a,\*</sup> and Jiangtao Sun<sup>a,\*</sup>

<sup>a</sup>*Jiangsu Key Laboratory of Advanced Catalytic Materials & Technology, School of Petrochemical Engineering, Changzhou University, Changzhou 213164, China*

*linqiu@cczu.edu.cn; jtsun@cczu.edu.cn*

## Table of contents

1. General information
2. Preparation of substrates
3. General procedure for the preparation of substrates 2
4. General procedure of Ethynyl Oxazolidinones
5. General Procedure for the Synthesis of Compounds 3
6. General Procedure for the Synthesis of Compounds 5
7. Gram-scale and Further transformations
8. Mechanism research
9. X-ray crystallographic data
10. References
11. NMR and HPLC Spectra

## General information

Unless otherwise stated, all reactions were carried out in dry Schlenk tubes. Solvents were dried prior to use. Commercially obtained reagents were used as received. Reactions were monitored by analytical thin-layer chromatography (TLC) using pre-coated (0.20 mm thickness) silica gel plates with F254 indicator. Visualization of spots after TLC was accomplished by exposure to UV light (254 nm) and/or staining agents (iodine vapor, KMnO<sub>4</sub> in water). For column chromatography, 200-300 mesh silica gel was used. NMR spectra were recorded on a Bruker AVANCE III 400 MHz (400 MHz for <sup>1</sup>H NMR, 101 MHz for <sup>13</sup>C NMR) or 300 MHz (300 MHz for <sup>1</sup>H NMR, 75 MHz for <sup>13</sup>C NMR, 282 MHz for <sup>19</sup>F NMR) spectrometer using residual solvent peaks as the internal standard (CDCl<sub>3</sub>: 7.26 ppm for <sup>1</sup>H NMR, 77.16 ppm for <sup>13</sup>C NMR; (CD<sub>3</sub>)<sub>2</sub>SO-d<sub>6</sub>: 2.50 ppm for <sup>1</sup>H NMR, 39.6 ppm for <sup>13</sup>C NMR). Data for <sup>1</sup>H NMR spectra were reported as follows: chemical shift (δ ppm), multiplicity (s = singlet, d = doublet, t = triplet, q = quartet, dd = doublet of doublets, td = triplet of doublets, m = multiplet), coupling constants J in Hertz (Hz), and integration. Data for <sup>13</sup>C NMR spectra were reported in terms of chemical shift (δ ppm). High resolution mass spectra (HRMS) were performed on Agilent 6540 Q-TOF or Agilent 6230A TOF mass spectrometer (ESI). GCMS was performed on Agilent Technologies 7820A (EI). Melting points were uncorrected and determined on a SGW X-4B melting point apparatus. The measurements of crystal were taken in a Bruker D8 Venture diffractometer. The data were integrated by Bruker D8 with multi-scan absorption corrections. The structure solution and refinement were processed by SHELXL (2018/3). All of the copper salts were commercially available and purchased from Energy Chemical, Titan Scientific, and Bidepharm.

## Preparation of substrates

L1-L5<sup>1a</sup>, L6<sup>1b</sup>, L7<sup>1c</sup>, L4<sup>1d</sup> were known compounds and prepared according to the literature procedures.<sup>1</sup> Compounds **1** and **4** were prepared according to the literature procedures.<sup>2</sup> The propargylic cyclic carbonate **2** was prepared according to literature procedures.<sup>3</sup> Compounds **6** were prepared according to the literature procedures.<sup>4</sup>

## General procedure for the preparation of substrates **2**

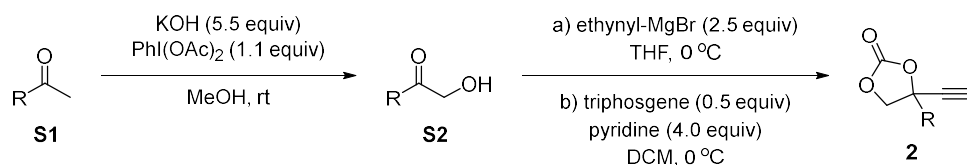

To a cold solution of ketone **S1** (15 mmol, 1.0 equiv) in MeOH was added KOH (4.629 g, 82.5 mmol, 5.5 equiv) in portions. Subsequently, PhI(OAc)<sub>2</sub> (diacetoxyiodobenzene) (5.314 g, 16.5 mmol, 1.1 equiv) was added slowly. The reaction mixture was stirred from 0 °C to room temperature for 2–3 h and then concentrated under reduced pressure. The residue was partitioned between H<sub>2</sub>O (30 mL) and Et<sub>2</sub>O (30 mL). The organic layer was separated, dried over Na<sub>2</sub>SO<sub>4</sub> and filtered. The filtrate was concentrated, and the resulting residue was dissolved in MeOH (30 mL) and 2 N HCl (30 mL). The mixture was stirred overnight at room temperature. It was then carefully neutralized to pH = 7 with a saturated aqueous NaHCO<sub>3</sub> solution and diluted with DCM (30 mL). The organic layer was separated, dried over anhydrous Na<sub>2</sub>SO<sub>4</sub>, and filtered. The filtrate was concentrated under reduced pressure, and the crude residue was purified by silica gel chromatography (petroleum ether/ethyl acetate = 30:1 to 20:1) to afford **S2**.

A solution of hydroxy methyl ketone **S2** (5 mmol, 1.0 equiv) in THF (20 mL) was cooled to 0 °C. Ethynylmagnesium bromide (0.5 M in THF, 2.5 equiv) was added, and the reaction was stirred under an argon atmosphere at room temperature for 2 h. The mixture was quenched with saturated aqueous NH<sub>4</sub>Cl and extracted with EtOAc. The combined organic layers were dried over anhydrous Na<sub>2</sub>SO<sub>4</sub>, filtered, and concentrated under reduced pressure to afford the crude product, which was used directly in the next step without further purification.

To a solution of the corresponding crude diol (1.0 equiv) and pyridine (4.0 equiv) in DCM (20 mL) was added triphosgene (0.5 equiv) at 0 °C. The reaction was stirred under an argon atmosphere at room temperature for 2 h. The reaction mixture was then quenched with saturated aqueous NH<sub>4</sub>Cl, and extracted with DCM. The combined organic layers were dried over anhydrous Na<sub>2</sub>SO<sub>4</sub>, filtered and concentrated under reduced pressure. The crude residue was purified by silica gel chromatography (petroleum ether/ethyl acetate = 20:1 to 10:1) to afford the corresponding propargylic cyclic carbonate **2**.

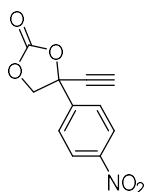

### **4-Ethynyl-4-(4-nitrophenyl)-1,3-dioxolan-2-one (2e)**

According to the general procedure for preparing cyclic carbonate **2**, obtained as a brown solid (957 mg, 82%), mp: 93.9–95.9 °C.

**R<sub>f</sub>** (petroleum ether/ethyl acetate = 3:1) = 0.5.

**<sup>1</sup>H NMR** (300 MHz, Chloroform-*d*) δ 8.33 (d, *J* = 9.0 Hz, 2H), 7.79 (d, *J* = 9.0 Hz, 2H), 4.89 (d, *J* = 8.6 Hz, 1H), 4.50 (d, *J* = 8.6 Hz, 1H), 3.10 (s, 1H).

**<sup>13</sup>C NMR** (75 MHz, Chloroform-*d*) δ 152.8, 148.7, 143.3, 126.3, 124.4, 79.8, 78.8, 78.0, 76.7.

**HRMS (ESI)** *m/z*: [M+H]<sup>+</sup> Calcd for C<sub>11</sub>H<sub>8</sub>NO<sub>5</sub> 234.0397; Found 234.0402.

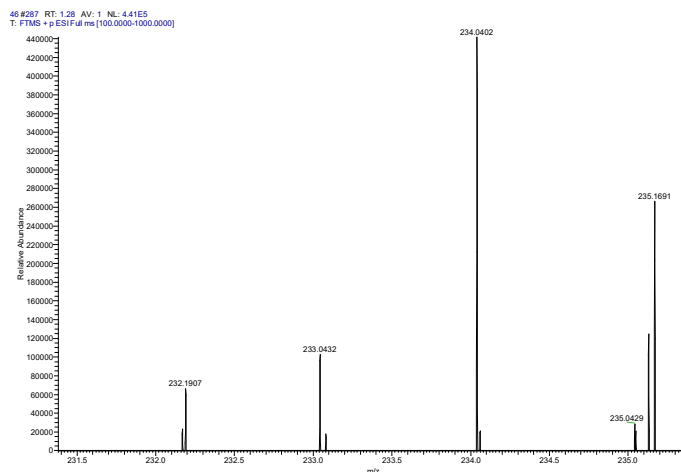

### General procedure of Ethynyl Oxazolidinones

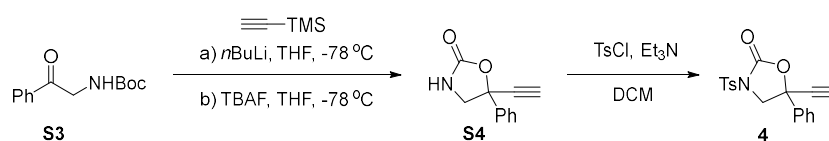

Ethynyl oxazolidinones were prepared according to the methods reported in the literature with some modifications. Trimethylsilylacetylene (2.95 g, 30 mmol) was dissolved into 50 mL THF and cooled to 0 °C, then *n*-BuLi (30 mmol, 2.5 M in Hexane, 12 mL) was added and stirred at this temperature for 1 h under argon atmosphere. The mixture was then cooled to -78 °C, and tert-butyl (2-oxo-2-phenylethyl) carbamate **S3** (10 mmol) in 10 mL THF was added. The mixture was allowed to stir at this temperature for further 10 min before warmed to room temperature and stirred overnight. A saturated solution of NH<sub>4</sub>Cl (20 mL) was added and the aqueous phase was extracted with EtOAc. The combined extracts were dried by Na<sub>2</sub>SO<sub>4</sub> and the solvent removed under vacuum. The crude product was used directly in the next step without further purification.

The crude product was dissolved in THF (30 mL) and cooled to -78 °C. TBAF (1.0 M in THF, 10 mL) was added and stirred 1 h at this temperature before quenching with saturated solution of NH<sub>4</sub>Cl (10 mL). The mixture was extracted with EtOAc, and the organic mixture was dried by Na<sub>2</sub>SO<sub>4</sub> and concentrated under reduced pressure. The concentrate was purified by silica gel flash chromatography (petroleum ether/ethyl acetate = 2:1) to give the product **S4** as a white solid.

The ethynyl oxazolidinones (374 mg, 2.0 mmol, 1.0 equiv) and Et<sub>3</sub>N (405 mg, 4.0 mmol, 2.0 equiv) were dissolved in DCM (5 mL). The mixture was then cooled to 0 °C, and TsCl (570 mg, 3.0 mmol, 1.5 equiv) was added dropwise. The mixture was warmed to room temperature and stirred for 8 h before quenching with saturated solution of NH<sub>4</sub>Cl (5 mL). The mixture was extracted with DCM. The organic mixture was dried by Na<sub>2</sub>SO<sub>4</sub> and concentrated under reduced pressure. The residue was purified by flash column chromatography (petroleum ether/ethyl acetate = 2:1) to give the cyclic ethynylethylene carbamates **4**.

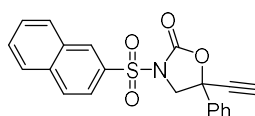

### 5-Ethynyl-3-(naphthalen-2-ylsulfonyl)-5-phenyloxazolidin-2-one (4d)

According to the general procedure for preparing ethynyl oxazolidinones, obtained a colorless oil (528 mg, 70%).

$R_f$  (petroleum ether/ethyl acetate = 3:1) = 0.5.

$^1\text{H NMR}$  (300 MHz, Chloroform-*d*)  $\delta$  8.63 (s, 1H), 8.01 – 7.98 (m, 3H), 7.95 – 7.88 (m, 1H), 7.71 – 7.60 (m, 2H), 7.46 – 7.43 (m, 2H), 7.38 – 7.32 (m, 3H), 4.56 (d,  $J = 9.5$  Hz, 1H), 4.19 (d,  $J = 9.5$  Hz, 1H), 2.84 (s, 1H).

$^{13}\text{C NMR}$  (75 MHz, Chloroform-*d*)  $\delta$  150.4, 137.1, 135.7, 133.6, 131.9, 130.6, 129.9, 129.82, 129.75, 129.1, 128.04, 127.99, 125.0, 122.4, 80.2, 78.1, 76.4, 58.6.

**HRMS (ESI)**  $m/z$ :  $[\text{M}+\text{H}]^+$  Calcd for  $\text{C}_{21}\text{H}_{16}\text{NO}_4\text{S}$  378.0795; Found 378.0792.

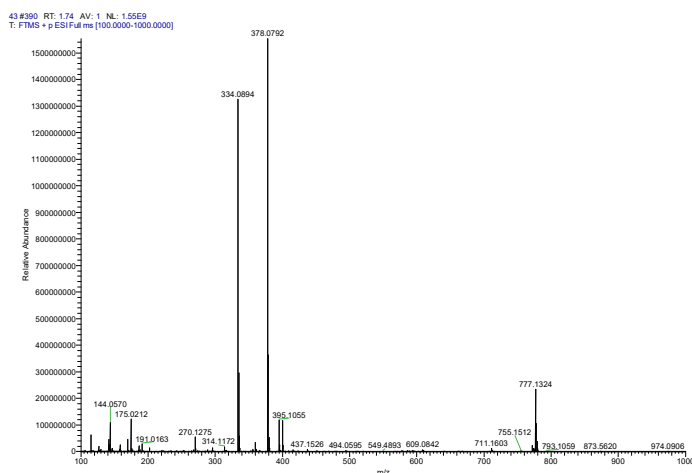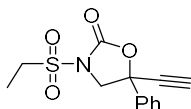

### 3-(Ethylsulfonyl)-5-ethynyl-5-phenyloxazolidin-2-one (4e)

According to the general procedure for preparing ethynyl oxazolidinones, obtained a white solid (395 mg, 72%), mp: 117.4-119.4 °C.

$R_f$  (petroleum ether/ethyl acetate = 2:1) = 0.4.

$^1\text{H NMR}$  (400 MHz, Chloroform-*d*)  $\delta$  7.60 – 7.54 (m, 2H), 7.49 – 7.43 (m, 3H), 4.46 (d,  $J = 9.6$  Hz, 1H), 4.18 (d,  $J = 9.6$  Hz, 1H), 3.68 – 3.48 (m, 2H), 2.97 (s, 1H), 1.45 (t,  $J = 7.4$  Hz, 3H).

$^{13}\text{C NMR}$  (101 MHz, Chloroform-*d*)  $\delta$  151.2, 136.9, 129.9, 129.2, 125.0, 80.3, 78.1, 77.0, 58.3, 47.8, 7.8.

**HRMS (ESI)**  $m/z$ :  $[\text{M}+\text{H}]^+$  Calcd for  $\text{C}_{13}\text{H}_{14}\text{NO}_4\text{S}$  280.0638; Found 280.0636.



mg, 0.024 mmol, 12 mol%) and dry DCM (1.0 mL). The resulting mixture was stirred at room temperature for 0.5 h. Then **1** (0.2 mmol, 1.0 equiv), **2** (0.6 mmol, 3.0 equiv), Et<sub>3</sub>N (24.3 mg, 0.24 mmol, 1.2 equiv) and dry DCM (3.0 mL) were added sequentially to the above solution at room temperature. The resulting mixture was stirred at 0 °C for 16 h. The reaction mixture was concentrated under vacuum; the crude residue was purified by silica gel column chromatography to give **3**.

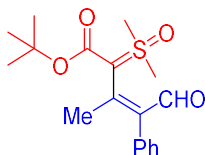

***tert*-Butyl (Z)-2-(dimethyl(oxo)-λ<sup>6</sup>-sulfaneylidene)-3-methyl-5-oxo-4-phenylpent-3-enoate (3aa)**

Prepared according to general procedure from [(CuOTf)<sub>2</sub>•PhMe (5.2 mg, 0.01 mmol, 5 mol%), **L5** (11.4 mg, 0.024 mmol, 12 mol%), *tert*-butyl 2-(dimethyl(oxo)-λ<sup>6</sup>-sulfaneylidene)acetate (38.4 mg, 0.2 mmol, 1.0 equiv), 4-ethynyl-4-phenyl-1,3-dioxolan-2-one (112.8 mg, 0.6 mmol, 3.0 equiv), Et<sub>3</sub>N (24.3 mg, 0.24 mmol, 1.2 equiv) in DCM (4.0 mL) at 0 °C for 16 h. The desired product was purified by silica gel column chromatography (petroleum ether/ethyl acetate = 3:1-1:2) and obtained as a yellow oil (62.5 mg, 93%).

**R<sub>f</sub>** (petroleum ether/ethyl acetate = 1:2) = 0.6.

**<sup>1</sup>H NMR** (300 MHz, Chloroform-*d*) δ 9.92 (s, 1H), 7.40 – 7.35 (m, 2H), 7.32 – 7.28 (m, 1H), 7.13 – 7.10 (m, 2H), 3.52 (s, 3H), 3.50 (s, 3H), 2.02 (s, 3H), 1.46 (s, 9H).

**<sup>13</sup>C NMR** (101 MHz, Chloroform-*d*) δ 191.5, 165.5, 149.4, 143.1, 136.4, 129.9, 128.2, 127.3, 79.8, 68.2, 44.0, 43.7, 28.7, 24.7.

**HRMS (ESI)** m/z: [M+H]<sup>+</sup> Calcd for C<sub>18</sub>H<sub>25</sub>O<sub>4</sub>S 337.1468; Found 337.1464.

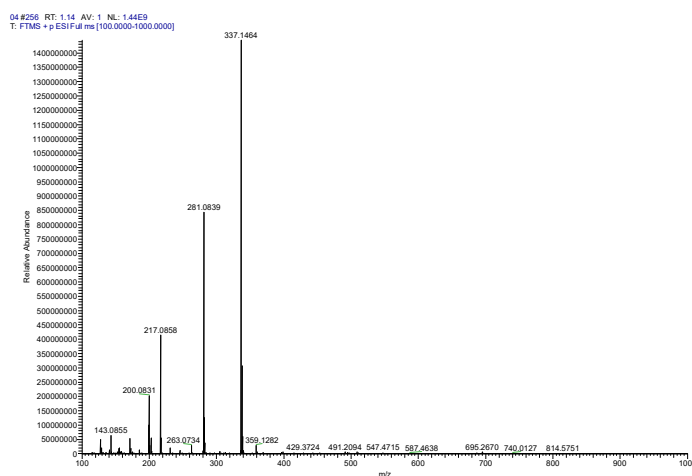

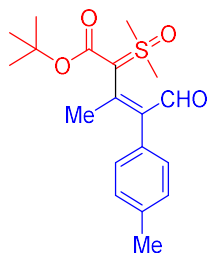

***tert-Butyl (Z)-2-(dimethyl(oxo)- $\lambda^6$ -sulfaneylidene)-3-methyl-5-oxo-4-(p-tolyl)pent-3-enoate (3ab)***

Prepared according to general procedure from [(CuOTf)<sub>2</sub>•PhMe (5.2 mg, 0.01 mmol, 5 mol%), L5 (11.4 mg, 0.024 mmol, 12 mol%), *tert*-butyl 2-(dimethyl(oxo)- $\lambda^6$ -sulfaneylidene)acetate (38.4 mg, 0.2 mmol, 1.0 equiv), 4-ethynyl-4-(p-tolyl)-1,3-dioxolan-2-one (121.2 mg, 0.6 mmol, 3.0 equiv), Et<sub>3</sub>N (24.3 mg, 0.24 mmol, 1.2 equiv) in DCM (4.0 mL) at 0 °C for 16 h. The desired product was purified by silica gel column chromatography (petroleum ether/ethyl acetate = 3:1-1:2) and obtained as a yellow solid (58.4 mg, 82%). mp: 166.9-168.8 °C.

R<sub>f</sub> (petroleum ether/ethyl acetate = 1:2) = 0.5.

<sup>1</sup>H NMR (400 MHz, Chloroform-*d*)  $\delta$  9.92 (s, 1H), 7.18 (d, *J* = 8.0 Hz, 2H), 7.00 (d, *J* = 8.0 Hz, 2H), 3.52 (s, 3H), 3.49 (s, 3H), 2.35 (s, 3H), 2.01 (s, 3H), 1.46 (s, 9H).

<sup>13</sup>C NMR (101 MHz, Chloroform-*d*)  $\delta$  191.7, 165.6, 149.0, 143.2, 136.9, 133.3, 129.7, 128.9, 79.8, 67.9, 44.1, 43.8, 28.8, 24.7, 21.3.

HRMS (ESI) *m/z*: [M+H]<sup>+</sup> Calcd for C<sub>19</sub>H<sub>27</sub>O<sub>4</sub>S 351.1625; Found 351.1625.

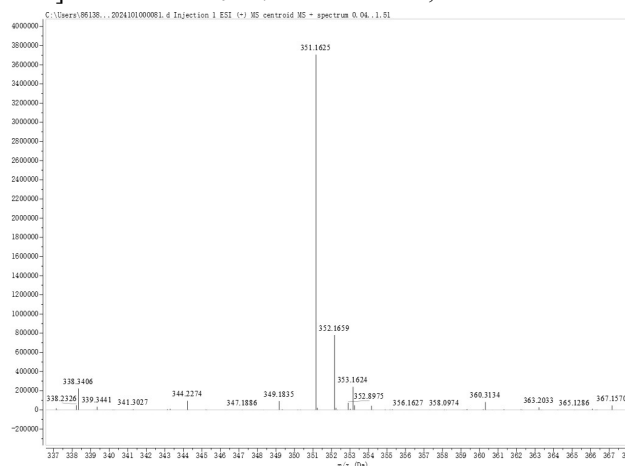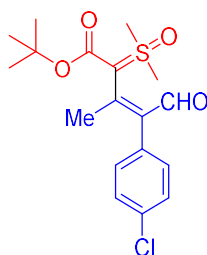

***tert-Butyl (Z)-4-(4-chlorophenyl)-2-(dimethyl(oxo)- $\lambda^6$ -sulfaneylidene)-3-methyl-5-oxopent-3-enoate (3ac)***

Prepared according to general procedure from [(CuOTf)<sub>2</sub>•PhMe (5.2 mg, 0.01 mmol, 5 mol%), L5

(11.4 mg, 0.024 mmol, 12 mol%), *tert*-butyl 2-(dimethyl(oxo)- $\lambda^6$ -sulfaneylidene)acetate (38.4 mg, 0.2 mmol, 1.0 equiv), 4-(4-chlorophenyl)-4-ethynyl-1,3-dioxolan-2-one (133.2 mg, 0.6 mmol, 3.0 equiv), Et<sub>3</sub>N (24.3 mg, 0.24 mmol, 1.2 equiv) in DCM (4.0 mL) at 0 °C for 16 h. The desired product was purified by silica gel column chromatography (petroleum ether/ethyl acetate = 3:1-1:2) and obtained as a yellow solid (47.9 mg, 65%), mp: 157.9-159.9 °C.

**R<sub>f</sub>** (petroleum ether/ethyl acetate = 1:2) = 0.5.

**<sup>1</sup>H NMR** (400 MHz, Chloroform-*d*)  $\delta$  9.85 (s, 1H), 7.36 – 7.32 (m, 2H), 7.08 – 7.04 (m, 2H), 3.53 (s, 3H), 3.50 (s, 3H), 2.02 (s, 3H), 1.46 (s, 9H).

**<sup>13</sup>C NMR** (101 MHz, Chloroform-*d*)  $\delta$  191.0, 165.5, 149.6, 141.6, 134.9, 133.1, 131.4, 128.4, 80.0, 67.9, 44.2, 44.0, 28.7, 24.5.

**HRMS (ESI)** m/z: [M+H]<sup>+</sup> Calcd for C<sub>18</sub>H<sub>24</sub>ClO<sub>4</sub>S 371.1078; Found 371.1076.

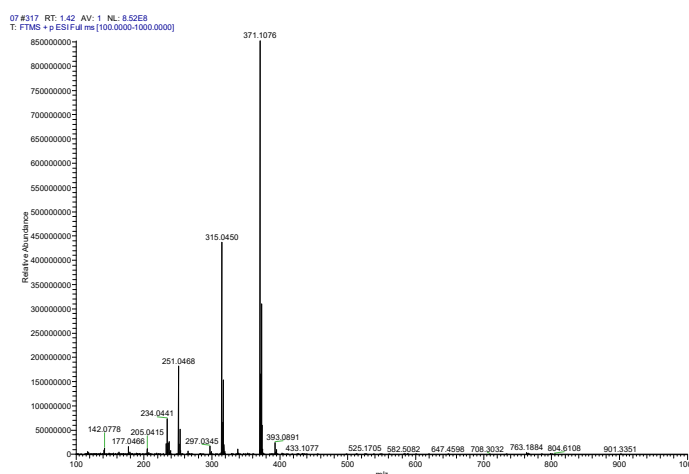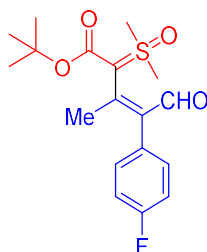

***tert*-Butyl (Z)-2-(dimethyl(oxo)- $\lambda^6$ -sulfaneylidene)-4-(4-fluorophenyl)-3-methyl-5-oxopent-3-enoate (3ad)**

Prepared according to general procedure from [(CuOTf)<sub>2</sub>•PhMe (5.2 mg, 0.01 mmol, 5 mol%), L5 (11.4 mg, 0.024 mmol, 12 mol%), *tert*-butyl 2-(dimethyl(oxo)- $\lambda^6$ -sulfaneylidene)acetate (38.4 mg, 0.2 mmol, 1.0 equiv), 4-ethynyl-4-(4-fluorophenyl)-1,3-dioxolan-2-one (123.6 mg, 0.6 mmol, 3.0 equiv), Et<sub>3</sub>N (24.3 mg, 0.24 mmol, 1.2 equiv) in DCM (4.0 mL) at 0 °C for 16 h. The desired product was purified by silica gel column chromatography (petroleum ether/ethyl acetate = 3:1-1:2) and obtained as a yellow solid (57.8 mg, 82%), mp: 190.2-191.8 °C.

**R<sub>f</sub>** (petroleum ether/ethyl acetate = 1:2) = 0.45.

**<sup>1</sup>H NMR** (400 MHz, Chloroform-*d*)  $\delta$  9.89 (s, 1H), 7.09 – 7.04 (m, 4H), 3.53 (s, 3H), 3.51 (s, 3H), 2.02 (s, 3H), 1.46 (s, 9H).

$^{13}\text{C}$  NMR (101 MHz, Chloroform-*d*)  $\delta$  191.2, 165.6, 162.1 (d,  $J = 245.8$  Hz), 149.4, 142.0, 133.0 (d,  $J = 7.9$  Hz), 131.6 (d,  $J = 8.0$  Hz), 115.2 (d,  $J = 21.4$  Hz), 79.9, 67.6, 44.3, 44.0, 28.7, 24.6.

$^{19}\text{F}$  NMR (282 MHz, Chloroform-*d*)  $\delta$  -115.24.

HRMS (ESI)  $m/z$ :  $[\text{M}+\text{H}]^+$  Calcd for  $\text{C}_{18}\text{H}_{24}\text{FO}_4\text{S}$  355.1374; Found 355.1370.

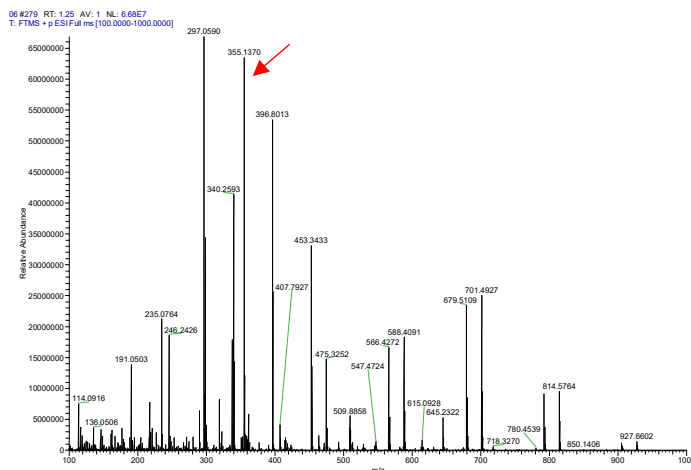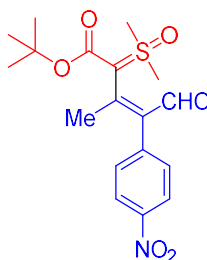

***tert*-Butyl (Z)-2-(dimethyl(oxo)- $\lambda^6$ -sulfaneylidene)-3-methyl-4-(4-nitrophenyl)-5-oxopent-3-enoate (3ae)**

Prepared according to general procedure from  $[(\text{CuOTf})_2 \cdot \text{PhMe}]$  (5.2 mg, 0.01 mmol, 5 mol%), **L5** (11.4 mg, 0.024 mmol, 12 mol%), *tert*-butyl 2-(dimethyl(oxo)- $\lambda^6$ -sulfaneylidene)acetate (38.4 mg, 0.2 mmol, 1.0 equiv), 4-ethynyl-4-(4-nitrophenyl)-1,3-dioxolan-2-one (139.8 mg, 0.6 mmol, 3.0 equiv),  $\text{Et}_3\text{N}$  (24.3 mg, 0.24 mmol, 1.2 equiv) in DCM (4.0 mL) at 0 °C for 16 h. The desired product was purified by silica gel column chromatography (petroleum ether/ethyl acetate = 3:1-1:2) and obtained as a yellow solid (38.6 mg, 51%), mp: 159.9-161.7 °C.

$R_f$  (petroleum ether/ethyl acetate = 1:2) = 0.3.

$^1\text{H}$  NMR (400 MHz, Chloroform-*d*)  $\delta$  9.82 (s, 1H), 8.23 (d,  $J = 8.4$  Hz, 2H), 7.31 (d,  $J = 8.4$  Hz, 2H), 3.57 (s, 6H), 2.05 (s, 3H), 1.46 (s, 9H).

$^{13}\text{C}$  NMR (101 MHz, Chloroform-*d*)  $\delta$  190.0, 165.5, 150.2, 146.9, 144.0, 140.2, 131.2, 123.4, 80.4, 68.2, 44.6, 44.3, 28.7, 24.4.

HRMS (ESI)  $m/z$ :  $[\text{M}+\text{H}]^+$  Calcd for  $\text{C}_{18}\text{H}_{24}\text{NO}_6\text{S}$  382.1319; Found 382.1310.

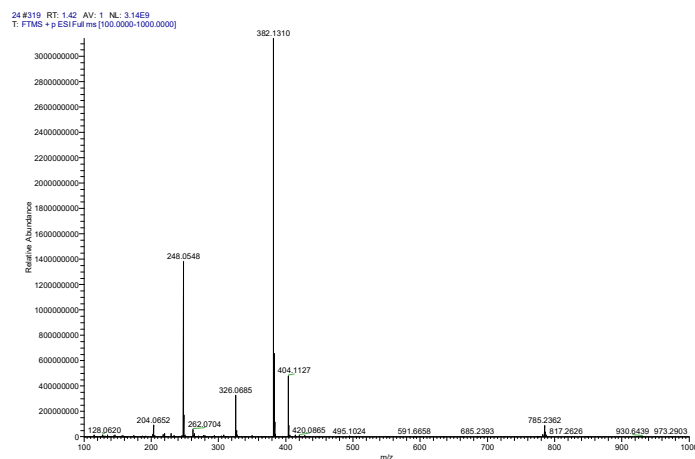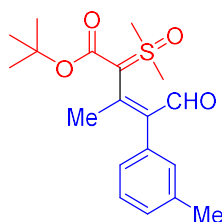

***tert-Butyl (Z)-2-(dimethyl(oxo)- $\lambda^6$ -sulfaneylidene)-3-methyl-5-oxo-4-(m-tolyl)pent-3-enoate (3af)***

Prepared according to general procedure from [(CuOTf)<sub>2</sub>•PhMe (5.2 mg, 0.01 mmol, 5 mol%), **L5** (11.4 mg, 0.024 mmol, 12 mol%), *tert*-butyl 2-(dimethyl(oxo)- $\lambda^6$ -sulfaneylidene)acetate (38.4 mg, 0.2 mmol, 1.0 equiv), 4-ethynyl-4-(*m*-tolyl)-1,3-dioxolan-2-one (121.2 mg, 0.6 mmol, 3.0 equiv), Et<sub>3</sub>N (24.3 mg, 0.24 mmol, 1.2 equiv) in DCM (4.0 mL) at 0 °C for 16 h. The desired product was purified by silica gel column chromatography (petroleum ether/ethyl acetate = 3:1-1:2) and obtained as a yellow oil (59.3 mg, 85%).

**R<sub>f</sub>** (petroleum ether/ethyl acetate = 1:2) = 0.5.

**<sup>1</sup>H NMR** (400 MHz, Chloroform-*d*)  $\delta$  9.90 (s, 1H), 7.26 (t, *J* = 7.6 Hz, 1H), 7.10 (d, *J* = 7.6 Hz, 1H), 6.95 – 6.86 (m, 2H), 3.51 (s, 3H), 3.47 (s, 3H), 2.35 (s, 3H), 2.01 (s, 3H), 1.46 (s, 9H).

**<sup>13</sup>C NMR** (101 MHz, Chloroform-*d*)  $\delta$  191.7, 165.5, 149.3, 143.3, 137.7, 136.4, 130.5, 128.1, 127.9, 126.9, 79.8, 68.2, 44.0, 43.7, 28.8, 24.7, 21.5.

**HRMS (ESI)** *m/z*: [M+H]<sup>+</sup> Calcd for C<sub>19</sub>H<sub>27</sub>O<sub>4</sub>S 351.1625; Found 351.1620.

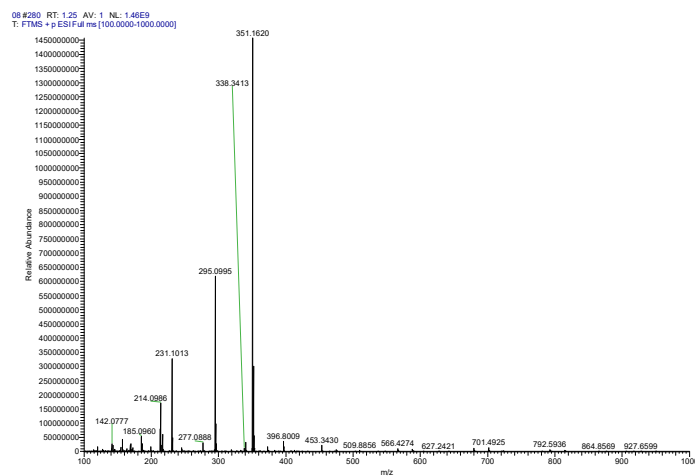

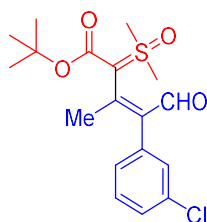

***tert-Butyl (Z)-4-(3-chlorophenyl)-2-(dimethyl(oxo)- $\lambda^6$ -sulfaneylidene)-3-methyl-5-oxopent-3-enoate (3ag)***

Prepared according to general procedure from [(CuOTf)<sub>2</sub>•PhMe (5.2 mg, 0.01 mmol, 5 mol%), L5 (11.4 mg, 0.024 mmol, 12 mol%), *tert*-butyl 2-(dimethyl(oxo)- $\lambda^6$ -sulfaneylidene)acetate (38.4 mg, 0.2 mmol, 1.0 equiv), 4-(3-chlorophenyl)-4-ethynyl-1,3-dioxolan-2-one (133.2 mg, 0.6 mmol, 3.0 equiv), Et<sub>3</sub>N (24.3 mg, 0.24 mmol, 1.2 equiv) in DCM (4.0 mL) at 0 °C for 16 h. The desired product was purified by silica gel column chromatography (petroleum ether/ethyl acetate = 3:1-1:2) and obtained as a yellow solid (41 mg, 55%), mp: 159.8-161.8 °C.

**R<sub>f</sub>** (petroleum ether/ethyl acetate = 1:2) = 0.5.

**<sup>1</sup>H NMR** (400 MHz, Chloroform-*d*)  $\delta$  9.84 (s, 1H), 7.33 – 7.28 (m, 2H), 7.12 – 7.11 (m, 1H), 7.02 – 7.00 (m, 1H), 3.53 (s, 3H), 3.51 (s, 3H), 2.02 (s, 3H), 1.46 (s, 9H).

**<sup>13</sup>C NMR** (101 MHz, Chloroform-*d*)  $\delta$  190.8, 165.5, 149.9, 141.4, 138.4, 133.9, 130.0, 129.5, 128.3, 127.4, 80.1, 68.1, 44.2, 44.0, 28.7, 24.6.

**HRMS (ESI)** *m/z*: [M+H]<sup>+</sup> Calcd for C<sub>18</sub>H<sub>24</sub>ClO<sub>4</sub>S 371.1078; Found 371.1074.

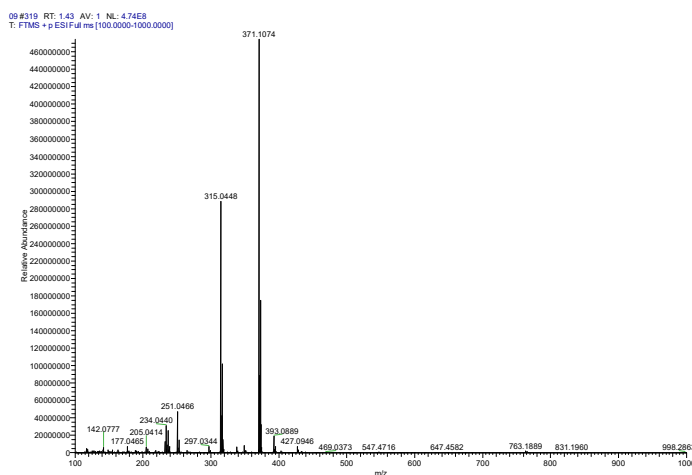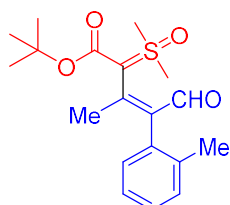

***tert-Butyl (Z)-2-(dimethyl(oxo)- $\lambda^6$ -sulfaneylidene)-3-methyl-5-oxo-4-(o-tolyl)pent-3-enoate (3ah)***

Prepared according to general procedure from [(CuOTf)<sub>2</sub>•PhMe (5.2 mg, 0.01 mmol, 5 mol%), L5 (11.4 mg, 0.024 mmol, 12 mol%), *tert*-butyl 2-(dimethyl(oxo)- $\lambda^6$ -sulfaneylidene)acetate (38.4 mg,

0.2 mmol, 1.0 equiv), 4-ethynyl-4-(*o*-tolyl)-1,3-dioxolan-2-one (121.2 mg, 0.6 mmol, 3.0 equiv), Et<sub>3</sub>N (24.3 mg, 0.24 mmol, 1.2 equiv) in DCM (4.0 mL) at RT for 12 h. The desired product was purified by silica gel column chromatography (petroleum ether/ethyl acetate = 3:1-1:2) and obtained as a yellow solid (53.2 mg, 76%), mp: 181.8-183.8 °C.

**R<sub>f</sub>** (petroleum ether/ethyl acetate = 1:2) = 0.5.

**<sup>1</sup>H NMR** (300 MHz, DMSO-*d*<sub>6</sub>) δ 9.84 (s, 1H), 7.25 – 7.14 (m, 3H), 6.99 – 6.79 (m, 1H), 3.68 (s, 3H), 3.58 (s, 3H), 2.06 (s, 3H), 1.80 (s, 3H), 1.40 (s, 9H).

**<sup>13</sup>C NMR** (75 MHz, DMSO-*d*<sub>6</sub>) δ 191.9, 164.9, 151.4, 142.8, 137.2, 136.6, 130.0, 127.7, 126.0, 78.6, 70.4, 42.9, 42.3, 29.0, 25.0, 19.8.

**HRMS (ESI)** *m/z*: [M+H]<sup>+</sup> Calcd for C<sub>19</sub>H<sub>27</sub>O<sub>4</sub>S 351.1625; Found 351.1620.

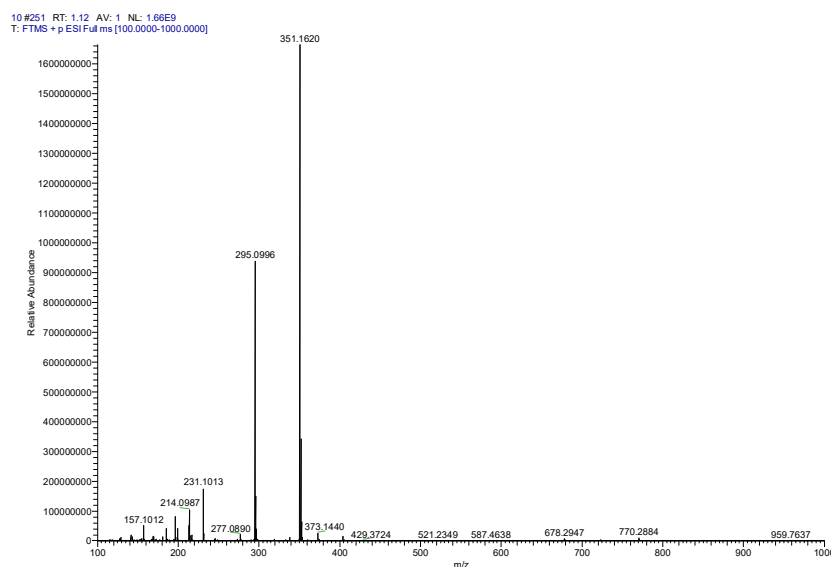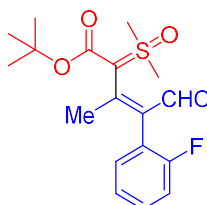

***tert*-Butyl (Z)-2-(dimethyl(oxo)-λ<sup>6</sup>-sulfaneylidene)-4-(2-fluorophenyl)-3-methyl-5-oxopent-3-enoate (3ai)**

Prepared according to general procedure from [(CuOTf)<sub>2</sub>•PhMe (5.2 mg, 0.01 mmol, 5 mol%), **L5** (11.4 mg, 0.024 mmol, 12 mol%), *tert*-butyl 2-(dimethyl(oxo)-λ<sup>6</sup>-sulfaneylidene)acetate (38.4 mg, 0.2 mmol, 1.0 equiv), 4-ethynyl-4-(2-fluorophenyl)-1,3-dioxolan-2-one (123.6 mg, 0.6 mmol, 3.0 equiv), Et<sub>3</sub>N (24.3 mg, 0.24 mmol, 1.2 equiv) in DCM (4.0 mL) at RT for 12 h. The desired product was purified by silica gel column chromatography (petroleum ether/ethyl acetate = 3:1-1:2) and obtained as a yellow solid (52.9 mg, 75%), mp: 191.2-193.1 °C.

**R<sub>f</sub>** (petroleum ether/ethyl acetate = 1:2) = 0.5.

**<sup>1</sup>H NMR** (400 MHz, Chloroform-*d*) δ 9.90 (s, 1H), 7.32 – 7.28 (m, 1H), 7.18 – 7.14 (m, 1H), 7.13 – 7.11 (m, 1H), 7.10 – 7.06 (m, 1H), 3.58 (s, 3H), 3.46 (s, 3H), 2.02 (s, 3H), 1.47 (s, 9H).

$^{13}\text{C}$  NMR (101 MHz, Chloroform-*d*)  $\delta$  190.8, 165.3, 161.1, 158.7, 136.9, 132.1 (d,  $J = 3.9$  Hz), 129.5 (d,  $J = 8.2$  Hz), 124.0 (d,  $J = 3.4$  Hz), 123.8 (d,  $J = 17.1$  Hz), 115.5 (d,  $J = 22.0$  Hz), 80.0, 44.1, 43.3, 28.7, 24.5 (d,  $J = 1.8$  Hz).

$^{19}\text{F}$  NMR (282 MHz, Chloroform-*d*)  $\delta$  -113.8.

HRMS (ESI)  $m/z$ :  $[\text{M}+\text{H}]^+$  Calcd for  $\text{C}_{18}\text{H}_{24}\text{FO}_4\text{S}$  355.1374; Found 355.1369.

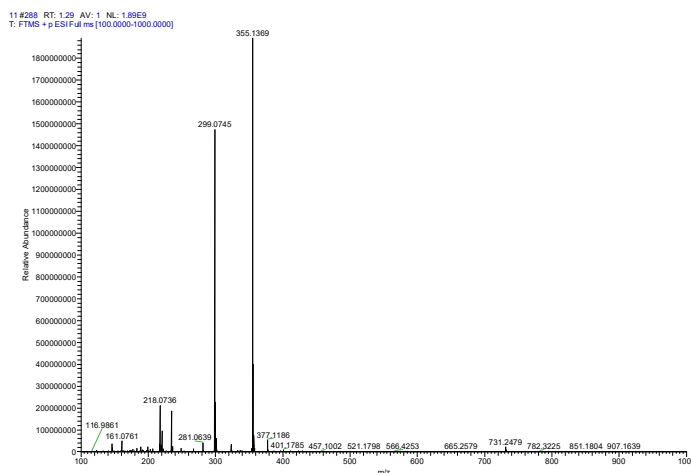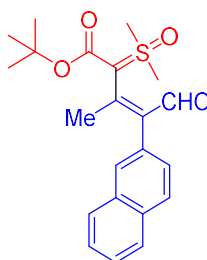

***tert*-Butyl (Z)-2-(dimethyl(oxo)- $\lambda^6$ -sulfaneylidene)-3-methyl-4-(naphthalen-2-yl)-5-oxopent-3-enoate (3aj)**

Prepared according to general procedure from  $[(\text{CuOTf})_2 \cdot \text{PhMe}]$  (5.2 mg, 0.01 mmol, 5 mol%), **L5** (11.4 mg, 0.024 mmol, 12 mol%), *tert*-butyl 2-(dimethyl(oxo)- $\lambda^6$ -sulfaneylidene)acetate (38.4 mg, 0.2 mmol, 1.0 equiv), 4-ethynyl-4-(naphthalen-2-yl)-1,3-dioxolan-2-one (142.8 mg, 0.6 mmol, 3.0 equiv),  $\text{Et}_3\text{N}$  (24.3 mg, 0.24 mmol, 1.2 equiv) in DCM (4.0 mL) at 0 °C for 16 h. The desired product was purified by silica gel column chromatography (petroleum ether/ethyl acetate = 3:1-1:2) and obtained as a yellow solid (64.4 mg, 85%), mp: 173.1-174.9 °C.

$R_f$  (petroleum ether/ethyl acetate = 1:2) = 0.5.

$^1\text{H}$  NMR (400 MHz, Chloroform-*d*)  $\delta$  9.95 (s, 1H), 7.85 – 7.80 (m, 3H), 7.60 (s, 1H), 7.48 – 7.44 (m, 2H), 7.27 – 7.21 (m, 1H), 3.50 (s, 3H), 3.47 (s, 3H), 2.05 (s, 3H), 1.48 (s, 9H).

$^{13}\text{C}$  NMR (101 MHz, Chloroform-*d*)  $\delta$  191.6, 165.6, 149.8, 142.9, 134.1, 133.3, 132.6, 130.2, 128.9, 128.1, 128.0, 127.7, 127.1, 125.9, 79.9, 68.3, 44.1, 43.8, 28.8, 24.7.

HRMS (ESI)  $m/z$ :  $[\text{M}+\text{H}]^+$  Calcd for  $\text{C}_{22}\text{H}_{27}\text{O}_4\text{S}$  387.1625; Found 387.1619.

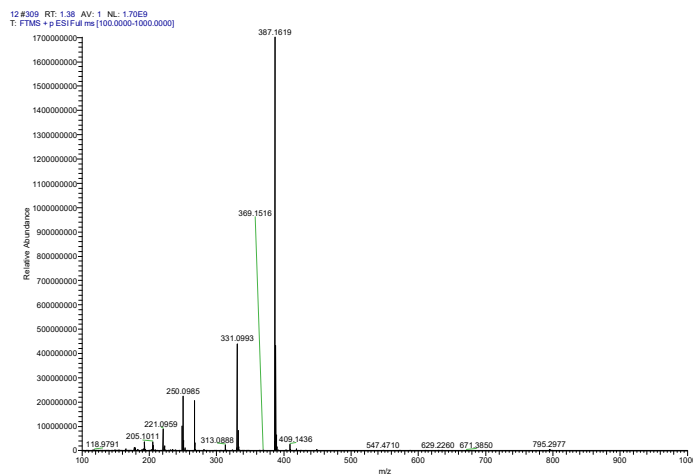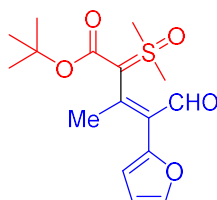

***tert-Butyl (Z)-2-(dimethyl(oxo)-λ<sup>6</sup>-sulfaneylidene)-4-(furan-2-yl)-3-methyl-5-oxopent-3-enoate (3ak)***

Prepared according to general procedure from [(CuOTf)<sub>2</sub>•PhMe (5.2 mg, 0.01 mmol, 5 mol%), **L5** (11.4 mg, 0.024 mmol, 12 mol%), *tert*-butyl 2-(dimethyl(oxo)-λ<sup>6</sup>-sulfaneylidene)acetate (38.4 mg, 0.2 mmol, 1.0 equiv), 4-ethynyl-4-(furan-2-yl)-1,3-dioxolan-2-one (106.8 mg, 0.6 mmol, 3.0 equiv), Et<sub>3</sub>N (24.3 mg, 0.24 mmol, 1.2 equiv) in DCM (4.0 mL) at 0 °C for 16 h. The desired product was purified by silica gel column chromatography (petroleum ether/ethyl acetate = 3:1-1:2) and obtained as a yellow oil (30.3 mg, 46%).

**R<sub>f</sub>** (petroleum ether/ethyl acetate = 1:2) = 0.6.

**<sup>1</sup>H NMR** (400 MHz, Chloroform-*d*) δ 9.73 (s, 1H), 7.45 (s, 1H), 6.61 (d, *J* = 3.3 Hz, 1H), 6.49 – 6.43 (m, 1H), 3.56 (s, 3H), 3.45 (s, 3H), 2.31 (s, 3H), 1.46 (s, 9H).

**<sup>13</sup>C NMR** (101 MHz, Chloroform-*d*) δ 189.6, 165.3, 150.5, 149.3, 141.7, 131.4, 111.3, 111.0, 80.3, 71.9, 44.0, 43.8, 28.7, 24.7.

**HRMS (ESI)** *m/z*: [M+H]<sup>+</sup> Calcd for C<sub>16</sub>H<sub>23</sub>O<sub>5</sub>S 327.1261; Found 327.1256.

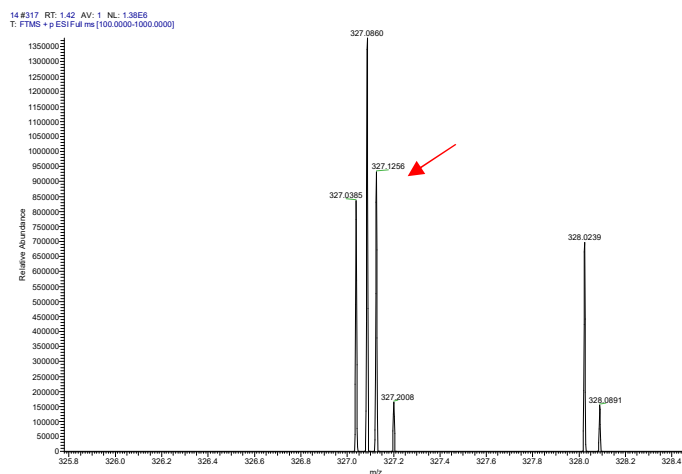

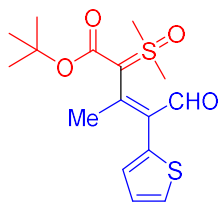

***tert-Butyl (E)-2-(dimethyl(oxo)-λ<sup>6</sup>-sulfaneylidene)-3-methyl-5-oxo-4-(thiophen-2-yl)pent-3-enoate (3al)***

Prepared according to general procedure from [(CuOTf)<sub>2</sub>•PhMe (5.2 mg, 0.01 mmol, 5 mol%), **L5** (11.4 mg, 0.024 mmol, 12 mol%), *tert*-butyl 2-(dimethyl(oxo)-λ<sup>6</sup>-sulfaneylidene)acetate (38.4 mg, 0.2 mmol, 1.0 equiv), 4-ethynyl-4-(thiophen-2-yl)-1,3-dioxolan-2-one (116.4 mg, 0.6 mmol, 3.0 equiv), Et<sub>3</sub>N (24.3 mg, 0.24 mmol, 1.2 equiv) in DCM (4.0 mL) at 0 °C for 16 h. The desired product was purified by silica gel column chromatography (petroleum ether/ethyl acetate = 3:1-1:2) and obtained as a yellow solid (49.2 mg, 72%), mp: 137.3-139.3 °C.

**R<sub>f</sub>** (petroleum ether/ethyl acetate = 1:2) = 0.5.

**<sup>1</sup>H NMR** (400 MHz, Chloroform-*d*) δ 9.84 (s, 1H), 7.37 (d, *J* = 5.1 Hz, 1H), 7.08 – 7.05 (m, 1H), 6.94 (d, *J* = 3.5 Hz, 1H), 3.55 (s, 3H), 3.49 (s, 3H), 2.23 (s, 3H), 1.46 (s, 9H).

**<sup>13</sup>C NMR** (101 MHz, Chloroform-*d*) δ 190.4, 165.3, 151.3, 136.3, 135.1, 128.1, 126.6, 126.2, 80.2, 70.0, 44.2, 43.8, 28.7, 24.9.

**HRMS (ESI)** *m/z*: [M+H]<sup>+</sup> Calcd for C<sub>16</sub>H<sub>23</sub>O<sub>4</sub>S<sub>2</sub> 343.1032; Found 343.1028.

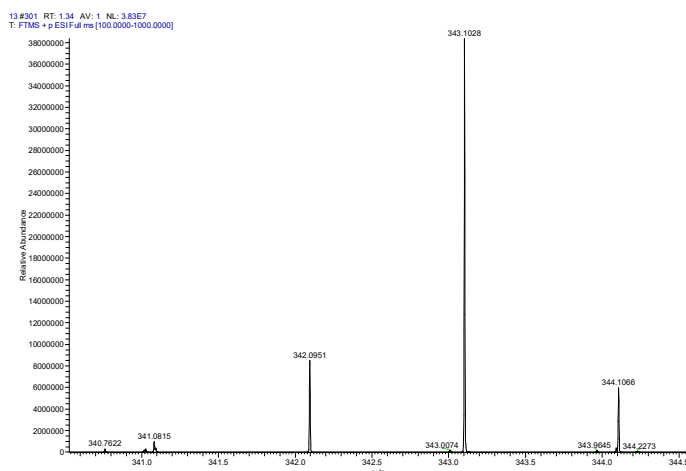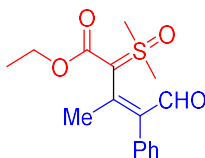

***Ethyl (Z)-2-(dimethyl(oxo)-λ<sup>6</sup>-sulfaneylidene)-3-methyl-5-oxo-4-phenylpent-3-enoate (3ba)***

Prepared according to general procedure from [(CuOTf)<sub>2</sub>•PhMe (5.2 mg, 0.01 mmol, 5 mol%), **L5** (11.4 mg, 0.024 mmol, 12 mol%), ethyl 2-(dimethyl(oxo)-λ<sup>6</sup>-sulfaneylidene)acetate (32.8 mg, 0.2 mmol, 1.0 equiv), 4-ethynyl-4-phenyl-1,3-dioxolan-2-one (112.8 mg, 0.6 mmol, 3.0 equiv), Et<sub>3</sub>N (24.3 mg, 0.24 mmol, 1.2 equiv) in DCM (4.0 mL) at 0 °C for 16 h. The desired product was purified by silica gel column chromatography (petroleum ether/ethyl acetate = 3:1-1:2) and

obtained as a yellow oil (48.6 mg, 79%).

$R_f$  (petroleum ether/ethyl acetate = 1:2) = 0.3.

$^1\text{H NMR}$  (400 MHz, Chloroform-*d*)  $\delta$  9.91 (s, 1H), 7.39 - 7.35 (m, 2H), 7.31 - 7.29 (m, 1H), 7.14 - 7.11 (m, 2H), 4.18 - 4.09 (m, 2H), 3.52 (s, 3H), 3.48 (s, 3H), 2.04 (s, 3H), 1.25 (td,  $J = 7.1, 1.5$  Hz, 3H).

$^{13}\text{C NMR}$  (101 MHz, Chloroform-*d*)  $\delta$  191.4, 165.6, 148.5, 143.6, 136.3, 129.9, 128.2, 127.4, 67.2, 59.4, 43.7, 24.6, 14.6.

**HRMS (ESI)**  $m/z$ :  $[\text{M}+\text{H}]^+$  Calcd for  $\text{C}_{16}\text{H}_{21}\text{O}_4\text{S}$  309.1155; Found 309.1151.

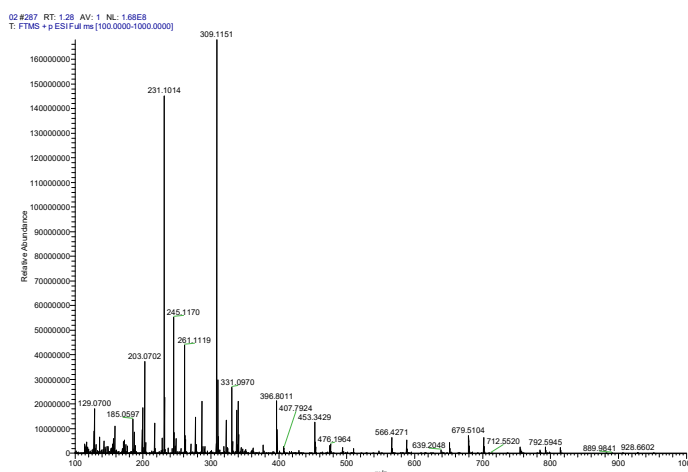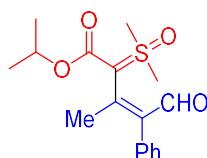

***Isopropyl (Z)-2-(dimethyl(oxo)- $\lambda^6$ -sulfaneylidene)-3-methyl-5-oxo-4-phenylpent-3-enoate (3ca)***

Prepared according to general procedure from  $[(\text{CuOTf})_2 \cdot \text{PhMe}]$  (5.2 mg, 0.01 mmol, 5 mol%), **L5** (11.4 mg, 0.024 mmol, 12 mol%), isopropyl 2-(dimethyl(oxo)- $\lambda^6$ -sulfaneylidene)acetate (35.6 mg, 0.2 mmol, 1.0 equiv), 4-ethynyl-4-phenyl-1,3-dioxolan-2-one (112.8 mg, 0.6 mmol, 3.0 equiv),  $\text{Et}_3\text{N}$  (24.3 mg, 0.24 mmol, 1.2 equiv) in DCM (4.0 mL) at 0 °C for 16 h. The desired product was purified by silica gel column chromatography (petroleum ether/ethyl acetate = 3:1-1:2) and obtained as a yellow oil (61.0 mg, 95%).

$R_f$  (ethyl acetate) = 0.7.

$^1\text{H NMR}$  (400 MHz, Chloroform-*d*)  $\delta$  9.90 (s, 1H), 7.40 - 7.35 (m, 2H), 7.32 - 7.29 (m, 1H), 7.15 - 7.11 (m, 2H), 5.03 - 4.96 (m, 1H), 3.53 (s, 3H), 3.50 (s, 3H), 2.03 (s, 3H), 1.23 (d,  $J = 6.4$  Hz, 6H).

$^{13}\text{C NMR}$  (101 MHz, Chloroform-*d*)  $\delta$  191.4, 165.3, 148.7, 143.6, 136.3, 129.9, 128.2, 127.3, 67.2, 66.8, 43.9, 24.6, 22.2.

**HRMS (ESI)**  $m/z$ :  $[\text{M}+\text{H}]^+$  Calcd for  $\text{C}_{17}\text{H}_{23}\text{O}_4\text{S}$  323.1312; Found 323.1308.

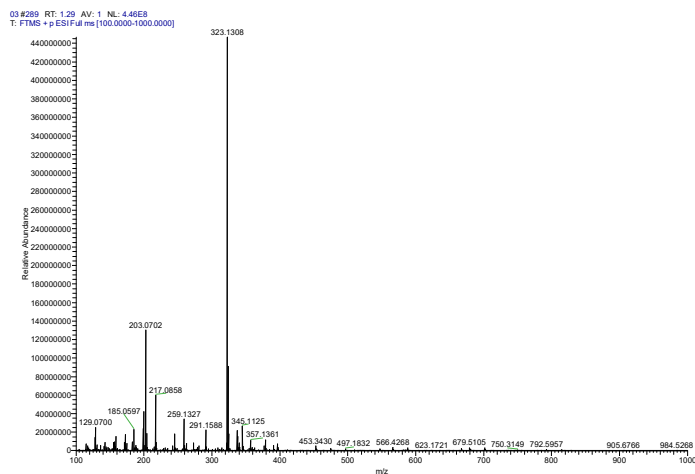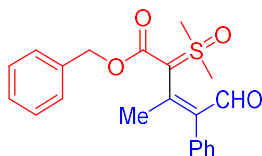

***Benzyl (Z)-2-(dimethyl(oxo)-λ<sup>6</sup>-sulfaneylidene)-3-methyl-5-oxo-4-phenylpent-3-enoate (3da)***

Prepared according to general procedure from [(CuOTf)<sub>2</sub>•PhMe (5.2 mg, 0.01 mmol, 5 mol%), **L5** (11.4 mg, 0.024 mmol, 12 mol%), benzyl 2-(dimethyl(oxo)-λ<sup>6</sup>-sulfaneylidene)acetate (45.2 mg, 0.2 mmol, 1.0 equiv), 4-ethynyl-4-phenyl-1,3-dioxolan-2-one (112.8 mg, 0.6 mmol, 3.0 equiv), Et<sub>3</sub>N (24.3 mg, 0.24 mmol, 1.2 equiv) in DCM (4.0 mL) at 0 °C for 16 h. The desired product was purified by silica gel column chromatography (petroleum ether/ethyl acetate = 3:1-1:2) and obtained as a yellow oil (62.8 mg, 85%).

**R<sub>f</sub>** (ethyl acetate) = 0.7.

**<sup>1</sup>H NMR** (300 MHz, DMSO-*d*<sub>6</sub>) δ 9.88 (s, 1H), 7.39 – 7.27 (m, 8H), 7.08 – 7.05 (m, 2H), 5.12 – 5.07 (m, 2H), 3.72 (s, 3H), 3.60 (s, 3H), 1.99 (s, 3H).

**<sup>13</sup>C NMR** (101 MHz, Chloroform-*d*) δ 191.5, 165.1, 148.4, 144.1, 136.9, 136.1, 131.3, 129.9, 128.5, 128.2, 127.9, 127.7, 127.4, 65.3, 43.6, 24.8.

**HRMS (ESI)** m/z: [M+H]<sup>+</sup> Calcd for C<sub>21</sub>H<sub>23</sub>O<sub>4</sub>S 371.1312; Found 371.1306.

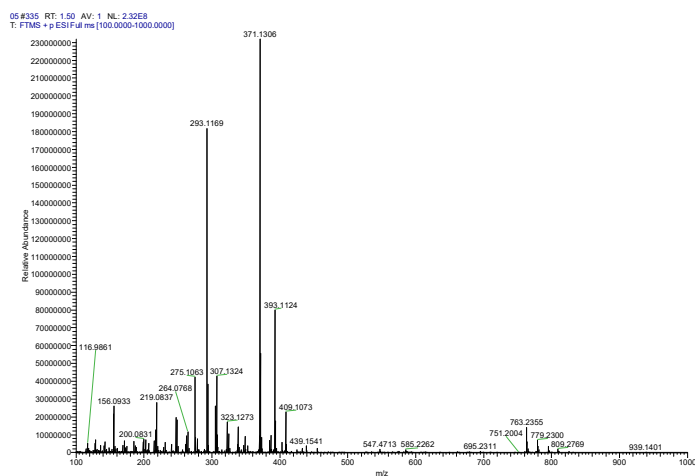

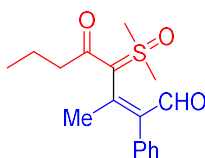

***(Z)*-4-(Dimethyl(oxo)-λ<sup>6</sup>-sulfaneylidene)-3-methyl-5-oxo-2-phenyloct-2-enal (3ea)**

Prepared according to general procedure from [(CuOTf)<sub>2</sub>•PhMe (5.2 mg, 0.01 mmol, 5 mol%), **L5** (11.4 mg, 0.024 mmol, 12 mol%), 1-(dimethyl(oxo)-λ<sup>6</sup>-sulfaneylidene)pentan-2-one (32.4 mg, 0.2 mmol, 1.0 equiv), 4-ethynyl-4-phenyl-1,3-dioxolan-2-one (112.8 mg, 0.6 mmol, 3.0 equiv), Et<sub>3</sub>N (24.3 mg, 0.24 mmol, 1.2 equiv) in DCM (4.0 mL) at 0 °C for 16 h. The desired product was purified by silica gel column chromatography (petroleum ether/ethyl acetate = 1:1-1:5) and obtained as a yellow oil (50.8 mg, 83%).

**R<sub>f</sub>** (ethyl acetate) = 0.4.

**<sup>1</sup>H NMR** (400 MHz, DMSO-*d*<sub>6</sub>) δ 9.89 (s, 1H), 7.42 – 7.38 (m, 2H), 7.35 – 7.30 (m, 1H), 7.10 – 7.08 (m, 2H), 3.68 (s, 3H), 3.65 (s, 3H), 2.23 – 2.16 (m, 1H), 2.10 – 1.99 (m, 1H), 1.98 (s, 3H), 1.50 (qd, *J* = 7.4, 2.6 Hz, 2H), 0.83 (t, *J* = 7.4 Hz, 3H).

**<sup>13</sup>C NMR** (101 MHz, DMSO-*d*<sub>6</sub>) δ 192.2, 187.1, 151.3, 144.9, 136.5, 130.1, 128.6, 127.7, 85.5, 42.4, 41.9, 39.6, 26.1, 19.0, 14.3.

**HRMS (ESI)** m/z: [M+H]<sup>+</sup> Calcd for C<sub>17</sub>H<sub>23</sub>O<sub>3</sub>S 307.1362; Found 307.1360.

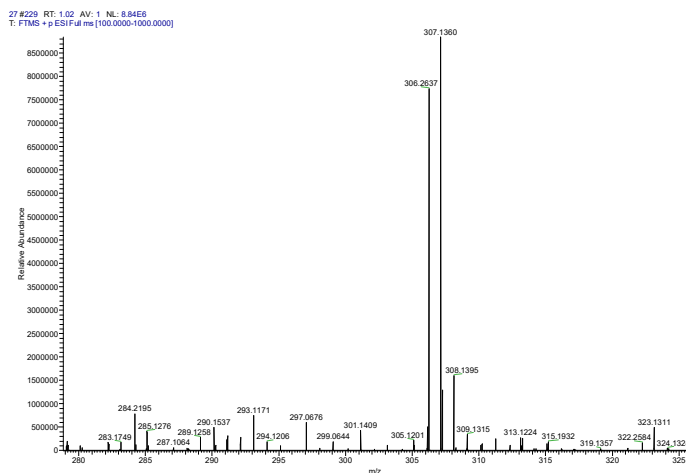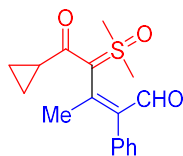

***(Z)*-5-Cyclopropyl-4-(dimethyl(oxo)-λ<sup>6</sup>-sulfaneylidene)-3-methyl-5-oxo-2-phenylpent-2-enal (3fa)**

Prepared according to general procedure from [(CuOTf)<sub>2</sub>•PhMe (5.2 mg, 0.01 mmol, 5 mol%), **L5** (11.4 mg, 0.024 mmol, 12 mol%), 1-cyclopropyl-2-(dimethyl(oxo)-λ<sup>6</sup>-sulfaneylidene)ethan-1-one (32.0 mg, 0.2 mmol, 1.0 equiv), 4-ethynyl-4-phenyl-1,3-dioxolan-2-one (112.8 mg, 0.6 mmol, 3.0 equiv), Et<sub>3</sub>N (24.3 mg, 0.24 mmol, 1.2 equiv) in DCM (4.0 mL) at 0 °C for 16 h. The desired product was purified by silica gel column chromatography (petroleum ether/ethyl acetate = 1:1-1:5)

and obtained as a yellow oil (43.3 mg, 71%).

$R_f$  (ethyl acetate) = 0.5.

$^1\text{H NMR}$  (400 MHz, Chloroform-*d*)  $\delta$  10.04 (s, 1H), 7.42 – 7.38 (m, 2H), 7.35 – 7.32 (m, 1H), 7.17 – 7.14 (m, 2H), 3.57 (s, 3H), 3.56 (s, 3H), 2.14 (s, 3H), 1.89 – 1.85 (m, 1H), 1.07 – 1.01 (m, 1H), 0.91 – 0.85 (m, 1H), 0.78 – 0.72 (m, 1H), 0.71 – 0.65 (m, 1H).

$^{13}\text{C NMR}$  (101 MHz, Chloroform-*d*)  $\delta$  191.6, 188.3, 149.7, 145.6, 135.7, 129.7, 128.3, 127.6, 82.7, 43.8, 43.6, 25.9, 16.9, 8.8, 8.0.

**HRMS (ESI)**  $m/z$ :  $[\text{M}+\text{H}]^+$  Calcd for  $\text{C}_{17}\text{H}_{21}\text{O}_3\text{S}$  305.1206; Found 305.1202.

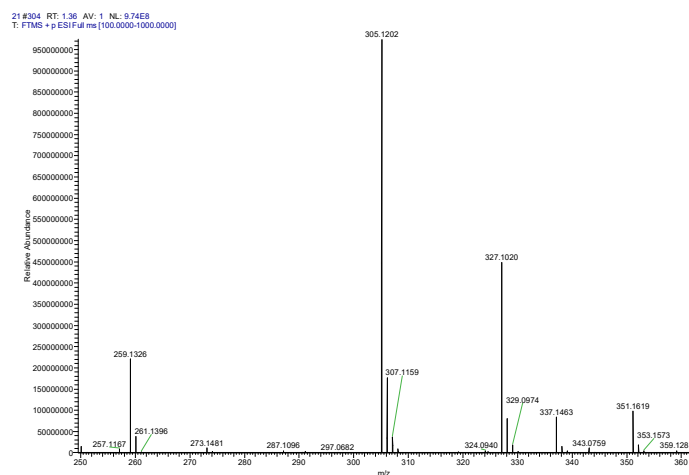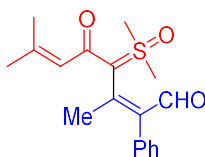

**(Z)-4-(Dimethyl(oxo)- $\lambda^6$ -sulfaneylidene)-3,7-dimethyl-5-oxo-2-phenylocta-2,6-dienal (3ga)**

Prepared according to general procedure from  $[(\text{CuOTf})_2 \cdot \text{PhMe}]$  (5.2 mg, 0.01 mmol, 5 mol%), **L5** (11.4 mg, 0.024 mmol, 12 mol%), 1-(dimethyl(oxo)- $\lambda^6$ -sulfaneylidene)-4-methylpent-3-en-2-one (34.8 mg, 0.2 mmol, 1.0 equiv), 4-ethynyl-4-phenyl-1,3-dioxolan-2-one (112.8 mg, 0.6 mmol, 3.0 equiv),  $\text{Et}_3\text{N}$  (24.3 mg, 0.24 mmol, 1.2 equiv) in DCM (4.0 mL) at 0 °C for 16 h. The desired product was purified by silica gel column chromatography (petroleum ether/ethyl acetate = 1:1-1:5) and obtained as a yellow solid (40.1 mg, 63%), mp: 194.7-196.7 °C.

$R_f$  (ethyl acetate) = 0.3.

$^1\text{H NMR}$  (400 MHz, Chloroform-*d*)  $\delta$  9.88 (s, 1H), 7.42 – 7.38 (m, 2H), 7.35 – 7.32 (m, 1H), 7.15 – 7.11 (m, 2H), 5.90 – 5.88 (m, 1H), 3.63 (s, 3H), 3.62 (s, 3H), 2.09 (d,  $J = 1.6$  Hz, 3H), 2.05 (s, 3H), 1.80 (d,  $J = 1.2$  Hz, 3H).

$^{13}\text{C NMR}$  (101 MHz, Chloroform-*d*)  $\delta$  191.1, 182.5, 149.4, 148.7, 145.5, 135.9, 129.7, 128.3, 127.6, 122.9, 84.9, 44.1, 43.5, 27.4, 25.5, 20.1.

**HRMS (ESI)**  $m/z$ :  $[\text{M}+\text{H}]^+$  Calcd for  $\text{C}_{18}\text{H}_{23}\text{O}_3\text{S}$  319.1362; Found 319.1358.

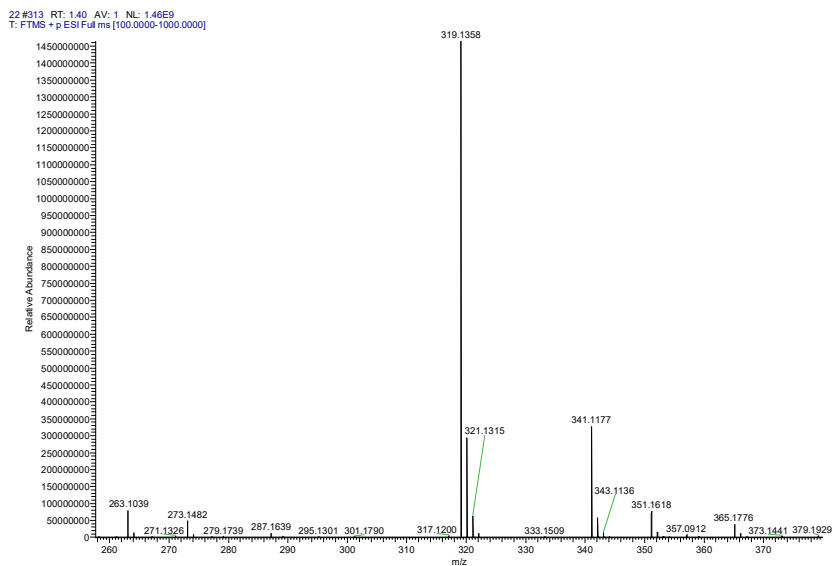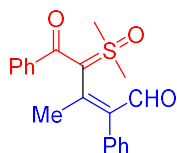

**(Z)-4-(Dimethyl(oxo)- $\lambda^6$ -sulfaneylidene)-3-methyl-5-oxo-2,5-diphenylpent-2-enal (3ha)**

Prepared according to general procedure from [(CuOTf)<sub>2</sub>•PhMe (5.2 mg, 0.01 mmol, 5 mol%), L5 (11.4 mg, 0.024 mmol, 12 mol%), 2-(dimethyl(oxo)- $\lambda^6$ -sulfaneylidene)-1-phenylethan-1-one (39.2 mg, 0.2 mmol, 1.0 equiv), 4-ethynyl-4-phenyl-1,3-dioxolan-2-one (112.8 mg, 0.6 mmol, 3.0 equiv), Et<sub>3</sub>N (24.3 mg, 0.24 mmol, 1.2 equiv) in DCM (4.0 mL) at 0 °C for 16 h. The desired product was purified by silica gel column chromatography (petroleum ether/ethyl acetate = 1:1-1:5) and obtained as a yellow solid (52.5 mg, 77%), mp: 84.5-86.5 °C.

R<sub>f</sub> (ethyl acetate) = 0.3.

<sup>1</sup>H NMR (400 MHz, Chloroform-*d*)  $\delta$  9.99 (s, 1H), 7.60 – 7.57 (m, 2H), 7.39 – 7.35 (m, 3H), 7.34 – 7.32 (m, 2H), 7.30 – 7.27 (m, 1H), 6.99 – 6.95 (m, 2H), 3.68 (s, 6H), 1.93 (s, 3H).

<sup>13</sup>C NMR (101 MHz, Chloroform-*d*)  $\delta$  190.5, 184.7, 148.5, 144.8, 140.1, 135.9, 130.5, 129.4, 128.3, 128.2, 127.6, 127.5, 84.6, 43.5, 42.9, 26.3.

HRMS (ESI) m/z: [M+H]<sup>+</sup> Calcd for C<sub>20</sub>H<sub>21</sub>O<sub>3</sub>S 341.1206; Found 341.1196.

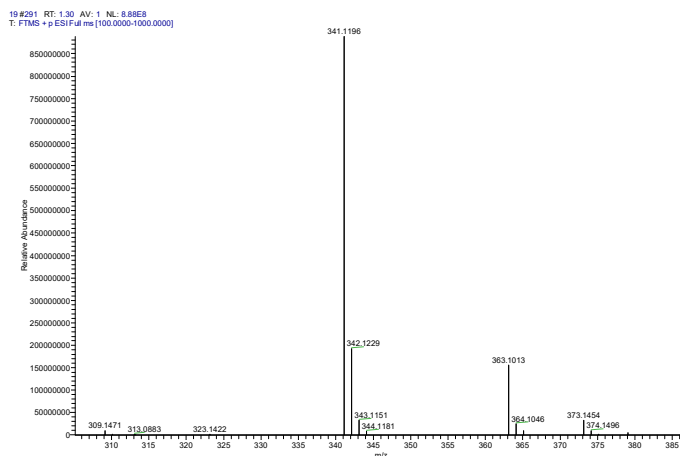

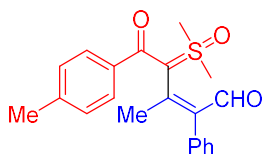

***(Z)*-4-(Dimethyl(oxo)-λ<sup>6</sup>-sulfaneylidene)-3-methyl-5-oxo-2-phenyl-5-(p-tolyl)pent-2-enal (3ia)**

Prepared according to general procedure from [(CuOTf)<sub>2</sub>•PhMe (5.2 mg, 0.01 mmol, 5 mol%), **L5** (11.4 mg, 0.024 mmol, 12 mol%), 2-(dimethyl(oxo)-λ<sup>6</sup>-sulfaneylidene)-1-(p-tolyl)ethan-1-one (42.0 mg, 0.2 mmol, 1.0 equiv), 4-ethynyl-4-phenyl-1,3-dioxolan-2-one (112.8 mg, 0.6 mmol, 3.0 equiv), Et<sub>3</sub>N (24.3 mg, 0.24 mmol, 1.2 equiv) in DCM (4.0 mL) at 0 °C for 16 h. The desired product was purified by silica gel column chromatography (petroleum ether/ethyl acetate = 3:1-1:1) and obtained as a yellow oil (44.4 mg, 63%).

**R<sub>f</sub>** (petroleum ether/ethyl acetate = 1:1) = 0.3.

**<sup>1</sup>H NMR** (400 MHz, Chloroform-*d*) δ 9.99 (s, 1H), 7.50 (d, *J* = 8.1 Hz, 2H), 7.37 – 7.33 (m, 2H), 7.3 – 7.28 (m, 1H), 7.17 (d, *J* = 7.9 Hz, 2H), 7.03 – 7.00 (m, 2H), 3.67 (s, 6H), 2.36 (s, 3H), 1.91 (s, 3H).

**<sup>13</sup>C NMR** (101 MHz, Chloroform-*d*) δ 190.5, 184.6, 148.7, 144.5, 140.9, 137.3, 136.0, 129.4, 129.0, 128.2, 127.7, 127.5, 84.4, 43.6, 43.0, 26.3, 21.5.

**HRMS (ESI)** *m/z*: [M+H]<sup>+</sup> Calcd for C<sub>21</sub>H<sub>23</sub>O<sub>3</sub>S 355.1362; Found 355.1352.

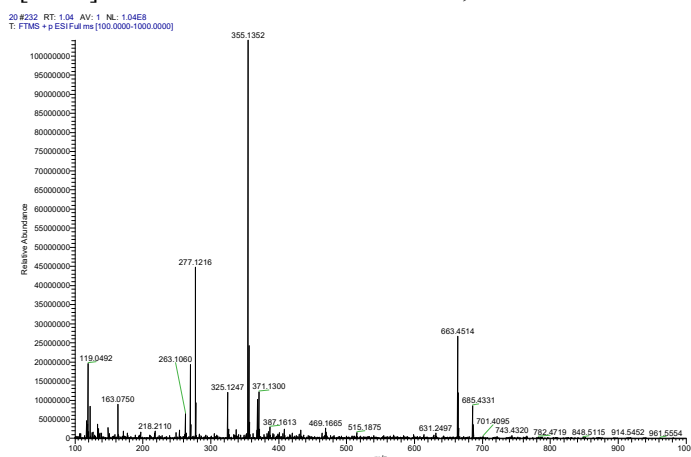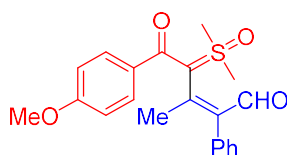

***(Z)*-4-(Dimethyl(oxo)-λ<sup>6</sup>-sulfaneylidene)-5-(4-methoxyphenyl)-3-methyl-5-oxo-2-phenylpent-2-enal (3ja)**

Prepared according to general procedure from [(CuOTf)<sub>2</sub>•PhMe (5.2 mg, 0.01 mmol, 5 mol%), **L5** (11.4 mg, 0.024 mmol, 12 mol%), 2-(dimethyl(oxo)-λ<sup>6</sup>-sulfaneylidene)-1-(4-methoxyphenyl)ethan-1-one (45.2 mg, 0.2 mmol, 1.0 equiv), 4-ethynyl-4-phenyl-1,3-dioxolan-2-one (112.8 mg, 0.6 mmol, 3.0 equiv), Et<sub>3</sub>N (24.3 mg, 0.24 mmol, 1.2 equiv) in DCM (4.0 mL) at 0 °C for 16 h. The desired product was purified by silica gel column chromatography (petroleum ether/ethyl acetate = 1:1-1:5) and obtained as a yellow solid (35.1 mg, 47%), mp: 187.2-189.2 °C.

$R_f$  (ethyl acetate) = 0.6.

$^1\text{H NMR}$  (400 MHz, Chloroform-*d*)  $\delta$  9.99 (s, 1H), 7.60 (d,  $J = 9.2$  Hz, 2H), 7.38 – 7.34 (m, 2H), 7.32 – 7.28 (m, 1H), 7.05 (d,  $J = 8.0$  Hz, 2H), 6.88 (d,  $J = 8.8$  Hz, 2H), 3.82 (s, 3H), 3.67 (s, 6H), 1.92 (s, 3H).

$^{13}\text{C NMR}$  (101 MHz, Chloroform-*d*)  $\delta$  190.5, 183.9, 161.5, 148.6, 144.5, 136.0, 132.4, 129.6, 129.5, 128.2, 127.5, 113.5, 84.0, 55.4, 43.8, 43.1, 26.2.

**HRMS (ESI)**  $m/z$ :  $[\text{M}+\text{H}]^+$  Calcd for  $\text{C}_{21}\text{H}_{23}\text{O}_4\text{S}$  371.1312; Found 371.1307.

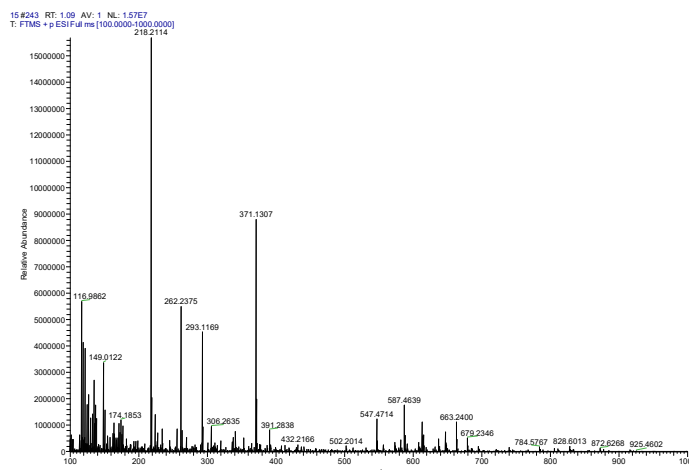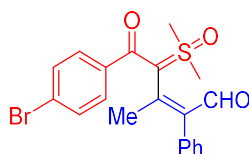

**(Z)-5-(4-Bromophenyl)-4-(dimethyl(oxo)- $\lambda^6$ -sulfaneylidene)-3-methyl-5-oxo-2-phenylpent-2-enal (3ka)**

Prepared according to general procedure from  $[(\text{CuOTf})_2 \cdot \text{PhMe}]$  (5.2 mg, 0.01 mmol, 5 mol%), **L5** (11.4 mg, 0.024 mmol, 12 mol%), 1-(4-bromophenyl)-2-(dimethyl(oxo)- $\lambda^6$ -sulfaneylidene)ethan-1-one (54.8 mg, 0.2 mmol, 1.0 equiv), 4-ethynyl-4-phenyl-1,3-dioxolan-2-one (112.8 mg, 0.6 mmol, 3.0 equiv),  $\text{Et}_3\text{N}$  (24.3 mg, 0.24 mmol, 1.2 equiv) in DCM (4.0 mL) at 0 °C for 16 h. The desired product was purified by silica gel column chromatography (petroleum ether/ethyl acetate = 1:1-1:5) and obtained as a yellow solid (33.7 mg, 40%), mp: 157.7-159.7 °C.

$R_f$  (ethyl acetate) = 0.6.

$^1\text{H NMR}$  (400 MHz, Chloroform-*d*)  $\delta$  9.97 (s, 1H), 7.53 – 7.45 (m, 4H), 7.38 – 7.34 (m, 2H), 7.32 – 7.28 (m, 1H), 7.00 – 6.97 (m, 2H), 3.67 (s, 6H), 1.92 (s, 3H).

$^{13}\text{C NMR}$  (101 MHz, Chloroform-*d*)  $\delta$  190.4, 183.0, 147.9, 144.9, 139.0, 135.6, 131.5, 129.3, 128.3, 127.7, 124.9, 84.9, 43.4, 42.7, 26.3.

**HRMS (ESI)**  $m/z$ :  $[\text{M}+\text{H}]^+$  Calcd for  $\text{C}_{20}\text{H}_{20}\text{BrO}_3\text{S}$  419.0311; Found 419.0303.

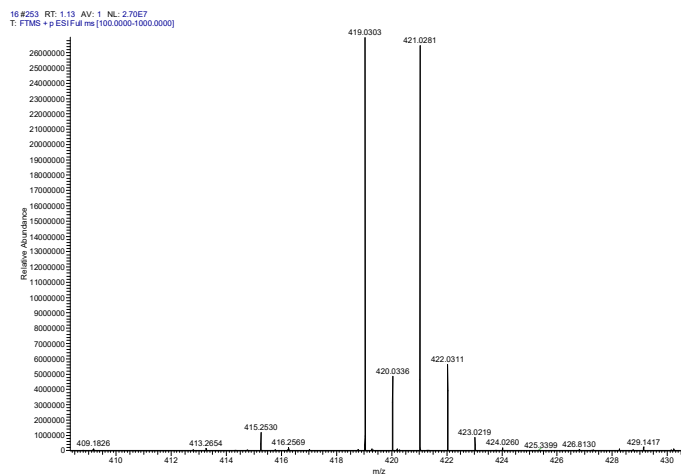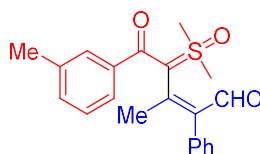

**(Z)-4-(Dimethyl(oxo)- $\lambda^6$ -sulfaneylidene)-3-methyl-5-oxo-2-phenyl-5-(m-tolyl)pent-2-enal (3la)**

Prepared according to general procedure from [(CuOTf)<sub>2</sub>•PhMe (5.2 mg, 0.01 mmol, 5 mol%), L5 (11.4 mg, 0.024 mmol, 12 mol%), 2-(dimethyl(oxo)- $\lambda^6$ -sulfaneylidene)-1-(m-tolyl)ethan-1-one (42.0 mg, 0.2 mmol, 1.0 equiv), 4-ethynyl-4-phenyl-1,3-dioxolan-2-one (112.8 mg, 0.6 mmol, 3.0 equiv), Et<sub>3</sub>N (24.3 mg, 0.24 mmol, 1.2 equiv) in DCM (4.0 mL) at 0 °C for 16 h. The desired product was purified by silica gel column chromatography (petroleum ether/ethyl acetate = 1:1-1:5) and obtained as a yellow solid (41.9 mg, 59%), mp: 97.1-99.1 °C.

R<sub>f</sub> (ethyl acetate) = 0.5.

<sup>1</sup>H NMR (400 MHz, Chloroform-*d*)  $\delta$  9.98 (s, 1H), 7.41 – 7.32 (m, 4H), 7.30 – 7.25 (m, 2H), 7.21 – 7.19 (m, 1H), 6.99 – 6.95 (m, 2H), 3.67 (s, 6H), 2.35 (s, 3H), 1.93 (s, 3H).

<sup>13</sup>C NMR (101 MHz, Chloroform-*d*)  $\delta$  190.5, 184.9, 148.8, 144.7, 140.0, 138.0, 135.9, 131.3, 129.3, 128.3, 128.2, 128.1, 127.5, 124.8, 84.5, 43.5, 42.9, 26.2, 21.4.

HRMS (ESI) m/z: [M+H]<sup>+</sup> Calcd for C<sub>21</sub>H<sub>23</sub>O<sub>3</sub>S 355.1362; Found 355.1360.

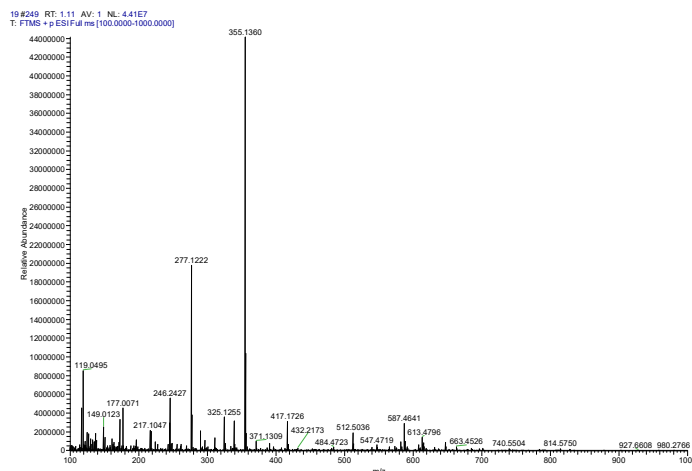

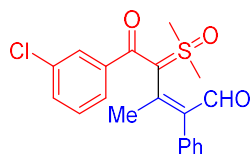

**(Z)-5-(3-Chlorophenyl)-4-(dimethyl(oxo)- $\lambda^6$ -sulfaneylidene)-3-methyl-5-oxo-2-phenylpent-2-enal (3ma)**

Prepared according to general procedure from [(CuOTf)<sub>2</sub>•PhMe (5.2 mg, 0.01 mmol, 5 mol%), **L5** (11.4 mg, 0.024 mmol, 12 mol%), 1-(3-chlorophenyl)-2-(dimethyl(oxo)- $\lambda^6$ -sulfaneylidene)ethan-1-one (46.0 mg, 0.2 mmol, 1.0 equiv), 4-ethynyl-4-phenyl-1,3-dioxolan-2-one (112.8 mg, 0.6 mmol, 3.0 equiv), Et<sub>3</sub>N (24.3 mg, 0.24 mmol, 1.2 equiv) in DCM (4.0 mL) at 0 °C for 16 h. The desired product was purified by silica gel column chromatography (petroleum ether/ethyl acetate = 1:1-1:5) and obtained as a yellow solid (46.1 mg, 62%), mp: 113.2-115.2 °C.

R<sub>f</sub> (ethyl acetate) = 0.5.

<sup>1</sup>H NMR (400 MHz, DMSO-*d*<sub>6</sub>)  $\delta$  9.79 (s, 1H), 7.44 – 7.40 (m, 4H), 7.34 – 7.30 (m, 2H), 7.28 – 7.23 (m, 1H), 6.86 – 6.83 (m, 2H), 3.84 (s, 3H), 3.80 (s, 3H), 1.94 (s, 3H).

<sup>13</sup>C NMR (101 MHz, Chloroform-*d*)  $\delta$  190.4 182.6, 148.0, 145.1, 141.8, 135.7, 134.2, 130.4, 129.7, 129.3, 128.3, 127.8, 127.7, 125.8, 85.0, 43.2, 42.7, 26.3.

HRMS (ESI) m/z: [M+H]<sup>+</sup> Calcd for C<sub>20</sub>H<sub>20</sub>ClO<sub>3</sub>S 375.0816; Found 375.0812.

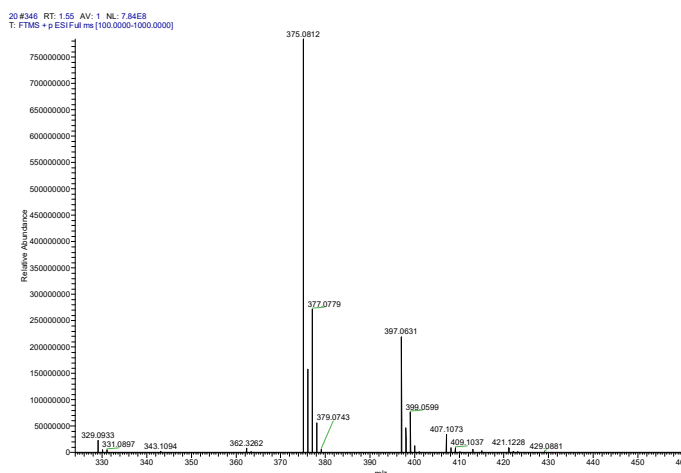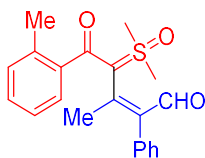

**(Z)-4-(Dimethyl(oxo)- $\lambda^6$ -sulfaneylidene)-3-methyl-5-oxo-2-phenyl-5-(o-tolyl)pent-2-enal (3na)**

Prepared according to general procedure from [(CuOTf)<sub>2</sub>•PhMe (5.2 mg, 0.01 mmol, 5 mol%), **L5** (11.4 mg, 0.024 mmol, 12 mol%), 2-(dimethyl(oxo)- $\lambda^6$ -sulfaneylidene)-1-(o-tolyl)ethan-1-one (42.0 mg, 0.2 mmol, 1.0 equiv), 4-ethynyl-4-phenyl-1,3-dioxolan-2-one (112.8 mg, 0.6 mmol, 3.0 equiv), Et<sub>3</sub>N (24.3 mg, 0.24 mmol, 1.2 equiv) in DCM (4.0 mL) at 0 °C for 16 h. The desired product was purified by silica gel column chromatography (petroleum ether/ethyl acetate = 1:1-1:5) and obtained as a yellow solid (52.6 mg, 74%), mp: 177.9-179.9 °C.

$R_f$  (ethyl acetate) = 0.4.

$^1\text{H NMR}$  (400 MHz,  $\text{DMSO-}d_6$ )  $\delta$  9.87 (s, 1H), 7.28 – 7.17 (m, 4H), 7.15 – 7.11 (m, 3H), 6.68 – 6.64 (m, 2H), 3.85 (s, 3H), 3.52 (s, 3H), 2.27 (s, 3H), 1.86 (s, 3H).

$^{13}\text{C NMR}$  (101 MHz,  $\text{Chloroform-}d$ )  $\delta$  190.3, 186.7, 148.6, 145.0, 140.1, 135.8, 135.6, 131.1, 129.3, 129.1, 128.1, 127.4, 126.9, 125.2, 86.2, 43.13, 43.07, 25.7, 19.6.

**HRMS (ESI)**  $m/z$ :  $[\text{M}+\text{H}]^+$  Calcd for  $\text{C}_{21}\text{H}_{23}\text{O}_3\text{S}$  355.1362; Found 355.1355.

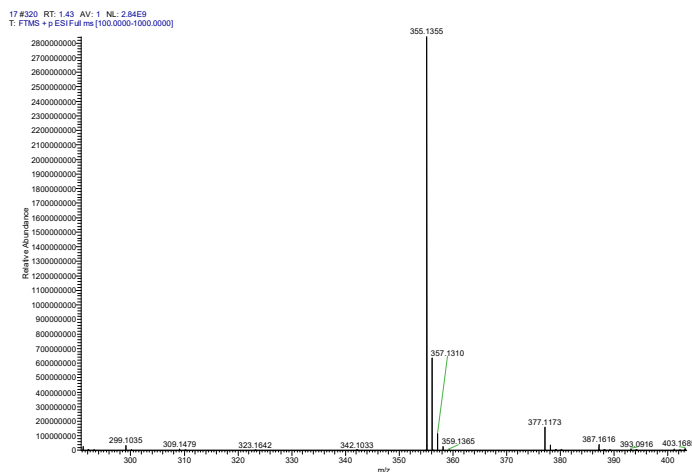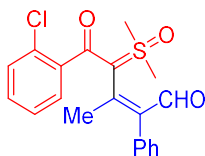

***(Z)*-5-(2-Chlorophenyl)-4-(dimethyl(oxo)- $\lambda^6$ -sulfaneylidene)-3-methyl-5-oxo-2-phenylpent-2-enal (30a)**

Prepared according to general procedure from  $[(\text{CuOTf})_2 \cdot \text{PhMe}]$  (5.2 mg, 0.01 mmol, 5 mol%), **L5** (11.4 mg, 0.024 mmol, 12 mol%), 1-(2-chlorophenyl)-2-(dimethyl(oxo)- $\lambda^6$ -sulfaneylidene)ethan-1-one (46.0 mg, 0.2 mmol, 1.0 equiv), 4-ethynyl-4-phenyl-1,3-dioxolan-2-one (112.8 mg, 0.6 mmol, 3.0 equiv),  $\text{Et}_3\text{N}$  (24.3 mg, 0.24 mmol, 1.2 equiv) in DCM (4.0 mL) at 0 °C for 16 h. The desired product was purified by silica gel column chromatography (petroleum ether/ethyl acetate = 1:1-1:5) and obtained as a yellow solid (41.6 mg, 56%), mp: 154.2-156.2 °C.

$R_f$  (ethyl acetate) = 0.6.

$^1\text{H NMR}$  (400 MHz,  $\text{Chloroform-}d$ )  $\delta$  10.04 (s, 1H), 7.37 – 7.35 (m, 1H), 7.30 – 7.23 (m, 6H), 6.75 (d,  $J = 7.2$  Hz, 2H), 3.73 (s, 3H), 3.71 (s, 3H), 1.94 (s, 3H).

$^{13}\text{C NMR}$  (101 MHz,  $\text{Chloroform-}d$ )  $\delta$  190.8, 182.5, 148.5, 145.5, 139.8, 135.7, 130.8, 130.1, 130.0, 129.3, 128.8, 128.2, 127.5, 126.8, 86.5, 43.3, 42.7, 25.3.

**HRMS (ESI)**  $m/z$ :  $[\text{M}+\text{H}]^+$  Calcd for  $\text{C}_{20}\text{H}_{20}\text{ClO}_3\text{S}$  375.0816; Found 375.0811.

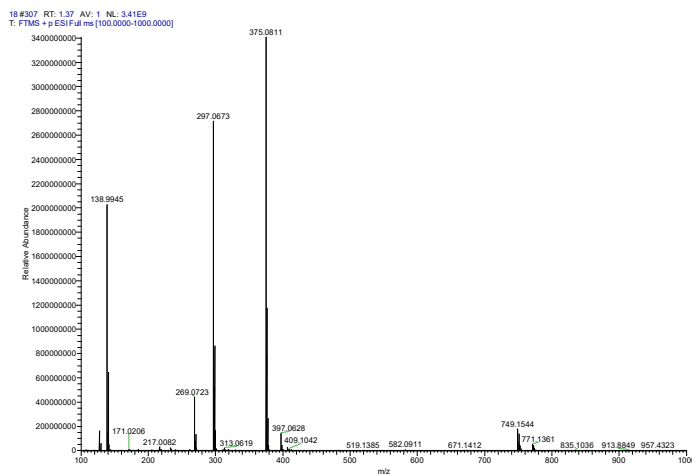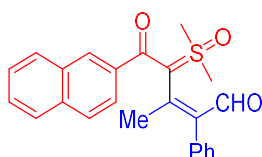

***(Z)-4-(Dimethyl(oxo)-λ<sup>6</sup>-sulfaneylidene)-3-methyl-5-(naphthalen-2-yl)-5-oxo-2-phenylpent-2-enal (3pa)***

Prepared according to general procedure from [(CuOTf)<sub>2</sub>•PhMe (5.2 mg, 0.01 mmol, 5 mol%), **L5** (11.4 mg, 0.024 mmol, 12 mol%), 2-(dimethyl(oxo)-λ<sup>6</sup>-sulfaneylidene)-1-(naphthalen-2-yl)ethan-1-one (49.2 mg, 0.2 mmol, 1.0 equiv), 4-ethynyl-4-phenyl-1,3-dioxolan-2-one (112.8 mg, 0.6 mmol, 3.0 equiv), Et<sub>3</sub>N (24.3 mg, 0.24 mmol, 1.2 equiv) in DCM (4.0 mL) at 0 °C for 16 h. The desired product was purified by silica gel column chromatography (petroleum ether/ethyl acetate = 1:1-1:5) and obtained as a yellow solid (49.1 mg, 63%), mp: 113.7-115.7 °C.

**R<sub>f</sub>** (ethyl acetate) = 0.5.

**<sup>1</sup>H NMR** (400 MHz, Chloroform-*d*) δ 10.08 (s, 1H), 8.13 (d, *J* = 1.6 Hz, 1H), 7.87 – 7.82 (m, 3H), 7.70 (dd, *J* = 8.6, 1.7 Hz, 1H), 7.55 – 7.48 (m, 2H), 7.34 – 7.29 (m, 2H), 7.28 – 7.25 (m, 1H), 7.00 – 6.96 (m, 2H), 3.71 (s, 6H), 1.93 (s, 3H).

**<sup>13</sup>C NMR** (101 MHz, Chloroform-*d*) δ 190.5, 184.3, 148.4, 144.9, 137.4, 135.8, 134.3, 132.7, 129.4, 128.8, 128.2, 128.14, 128.05, 127.8, 127.5, 127.3, 126.6, 124.6, 84.9, 43.6, 42.9, 26.4.

**HRMS (ESI)** *m/z*: [M+H]<sup>+</sup> Calcd for C<sub>24</sub>H<sub>23</sub>O<sub>3</sub>S 391.1362; Found 391.1356.

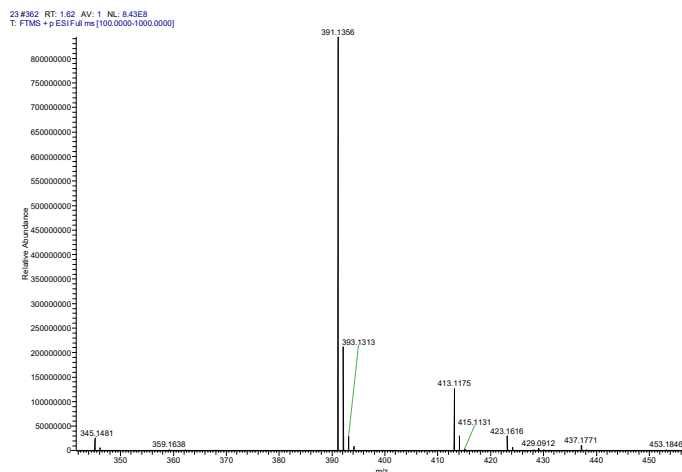

## General Procedure for the Synthesis of Compounds 5

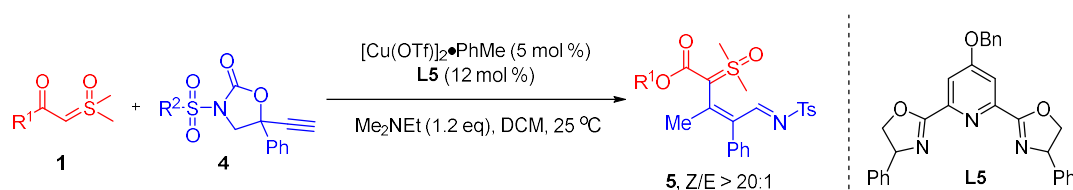

To a dry Schlenk tube were added  $[(\text{CuOTf})_2]\cdot\text{PhMe}$  (5.2 mg, 0.01 mmol, 5 mol%), **L5** (11.4 mg, 0.024 mmol, 12 mol%) and dry DCM (1.0 mL). The resulting mixture was stirred at room temperature for 0.5 h. Then **1** (0.2 mmol, 1.0 equiv), **4** (0.4 mmol, 2.0 equiv),  $\text{Me}_2\text{NEt}$  (17.5 mg, 0.24 mmol, 1.2 equiv) and dry DCM (3.0 mL) were added sequentially to the above solution at room temperature. The resulting mixture was stirred at RT for 2 h. After this time, The reaction mixture was concentrated under vacuum; the crude residue was purified by silica gel column chromatography to give **5**.

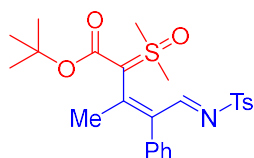

### *tert-Butyl (Z)-2-(dimethyl(oxo)- $\lambda^6$ -sulfaneylidene)-3-methyl-4-((4-methylphenyl)sulfonamido)-4-phenylbut-3-enoate (5aa)*

Prepared according to general procedure from  $[(\text{CuOTf})_2]\cdot\text{PhMe}$  (5.2 mg, 0.01 mmol, 5 mol%), **L5** (11.4 mg, 0.024 mmol, 12 mol%), tert-butyl 2-(dimethyl(oxo)- $\lambda^6$ -sulfaneylidene)acetate (38.4 mg, 0.2 mmol, 1.0 equiv), 5-ethynyl-5-phenyl-3-tosylloxazolidin-2-one (136.4 mg, 0.4 mmol, 2.0 equiv),  $\text{Me}_2\text{NEt}$  (17.5 mg, 0.24 mmol, 1.2 equiv) in DCM (4.0 mL) at RT for 2 h. The desired product was purified by silica gel column chromatography (petroleum ether/ethyl acetate = 5:1-1:1) and obtained as a yellow solid (75.2 mg, 77%), mp: 188.8-190.8 °C.

$R_f$  (petroleum ether/ethyl acetate = 1:1) = 0.5.

$^1\text{H NMR}$  (300 MHz, Chloroform-*d*)  $\delta$  9.03 (s, 1H), 7.73 – 7.70 (m, 2H), 7.30 – 7.22 (m, 5H), 7.10 – 7.06 (m, 2H), 3.58 (s, 3H), 3.48 (s, 3H), 2.38 (s, 3H), 2.09 (s, 3H), 1.47 (s, 9H).

$^{13}\text{C NMR}$  (75 MHz, Chloroform-*d*)  $\delta$  170.1, 165.1, 153.4, 143.4, 137.7, 137.0, 136.8, 130.3,

129.4, 128.0, 127.4, 127.2, 80.2, 71.0, 44.3 28.8, 24.6, 21.6.

**HRMS (ESI) m/z:** [M+H]<sup>+</sup> Calcd for C<sub>25</sub>H<sub>32</sub>NO<sub>5</sub>S<sub>2</sub> 490.1716; Found 490.1706.

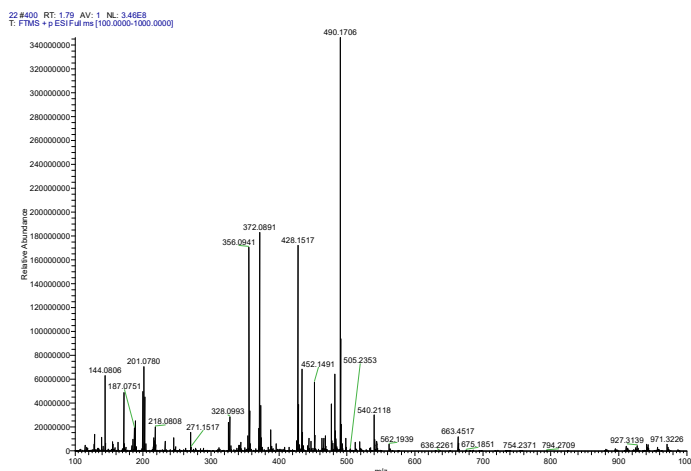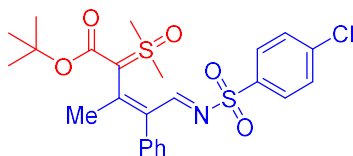

***tert-Butyl (Z)-4-((4-chlorophenyl)sulfonamido)-2-(dimethyl(oxo)-λ<sup>6</sup>-sulfaneylidene)-3-methyl-4-phenylbut-3-enoate (5ab)***

Prepared according to general procedure from [(CuOTf)<sub>2</sub>•PhMe (5.2 mg, 0.01 mmol, 5 mol%), **L5** (11.4 mg, 0.024 mmol, 12 mol%), tert-butyl 2-(dimethyl(oxo)-λ<sup>6</sup>-sulfaneylidene)acetate (38.4 mg, 0.2 mmol, 1.0 equiv), 3-((4-chlorophenyl)sulfonyl)-5-ethynyl-5-phenyloxazolidin-2-one (144.4 mg, 0.4 mmol, 2.0 equiv), Me<sub>2</sub>NEt (17.6 mg, 0.24 mmol, 1.2 equiv) in DCM (4.0 mL) at RT for 2 h. The desired product was purified by silica gel column chromatography (petroleum ether/ethyl acetate = 5:1-1:1) and obtained as a yellow solid (86.2 mg, 85%), mp: 173.6-175.6 °C. **R<sub>f</sub>** (petroleum ether/ethyl acetate = 1:1) = 0.6.

**<sup>1</sup>H NMR** (400 MHz, Chloroform-*d*) δ 9.02 (s, 1H), 7.77 (d, *J* = 8.4 Hz, 2H), 7.41 (d, *J* = 8.8 Hz, 2H), 7.33 – 7.25 (m, 3H), 7.08 (d, *J* = 6.8 Hz, 2H), 3.60 (s, 3H), 3.45 (s, 3H), 2.10 (s, 3H), 1.48 (s, 9H).

**<sup>13</sup>C NMR** (101 MHz, Chloroform-*d*) δ 170.5, 165.1, 154.5, 141.2, 139.0, 138.5, 137.3, 130.2, 129.0, 128.8, 128.1, 127.3, 80.4, 71.7, 44.4, 28.7, 24.6.

**HRMS (ESI) m/z:** [M+H]<sup>+</sup> Calcd for C<sub>24</sub>H<sub>29</sub>ClNO<sub>5</sub>S<sub>2</sub> 510.1170; Found 510.1163.

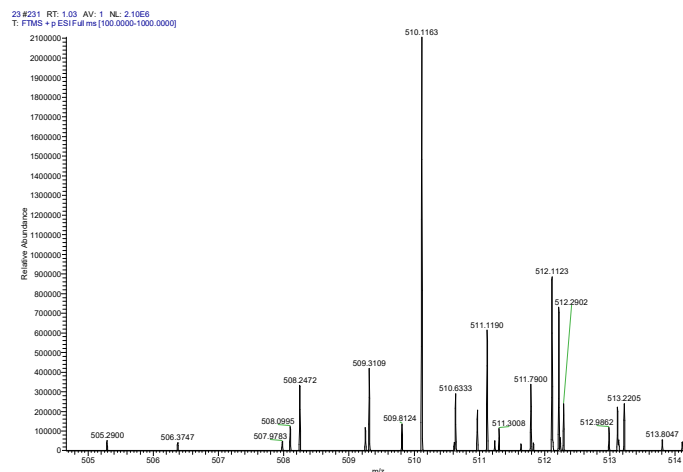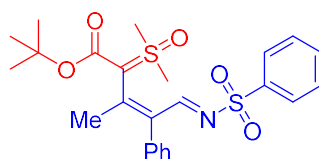

***tert-Butyl (Z)-2-(dimethyl(oxo)- $\lambda^6$ -sulfaneylidene)-3-methyl-4-phenyl-4-(phenylsulfonamido)but-3-enoate (5ac)***

Prepared according to general procedure from [(CuOTf)<sub>2</sub>•PhMe (5.2 mg, 0.01 mmol, 5 mol%), **L5** (11.4 mg, 0.024 mmol, 12 mol%), tert-butyl 2-(dimethyl(oxo)- $\lambda^6$ -sulfaneylidene)acetate (38.4 mg, 0.2 mmol, 1.0 equiv), 5-ethynyl-5-phenyl-3-(phenylsulfonyl)oxazolidin-2-one (65.4 mg, 0.4 mmol, 2.0 equiv), Me<sub>2</sub>NEt (17.6 mg, 0.24 mmol, 1.2 equiv) in DCM (4.0 mL) at RT for 2 h. The desired product was purified by silica gel column chromatography (petroleum ether/ethyl acetate = 5:1-1:1) and obtained as a yellow solid (64.8 mg, 68%), mp: 196.1-198.1 °C.

**R<sub>f</sub>** (petroleum ether/ethyl acetate = 1:1) = 0.5.

**<sup>1</sup>H NMR** (400 MHz, DMSO-*d*<sub>6</sub>)  $\delta$  8.84 (s, 1H), 7.79 – 7.76 (m, 2H), 7.69 – 7.64 (m, 1H), 7.59 – 7.55 (m, 2H), 7.37 – 7.33 (m, 2H), 7.310 – 7.26 (m, 1H), 7.05 – 7.03 (m, 2H), 3.63 (s, 6H), 2.01 (s, 3H), 1.41 (s, 9H).

**<sup>13</sup>C NMR** (101 MHz, DMSO-*d*<sub>6</sub>)  $\delta$  170.5, 164.2, 157.1, 139.5, 137.5, 136.5, 133.6, 130.3, 129.7, 128.6, 127.7, 127.5, 79.6, 75.7, 43.8, 28.8, 24.8.

**HRMS (ESI)** m/z: [M+H]<sup>+</sup> Calcd for C<sub>24</sub>H<sub>30</sub>NO<sub>5</sub>S<sub>2</sub> 476.1560; Found 476.1556.

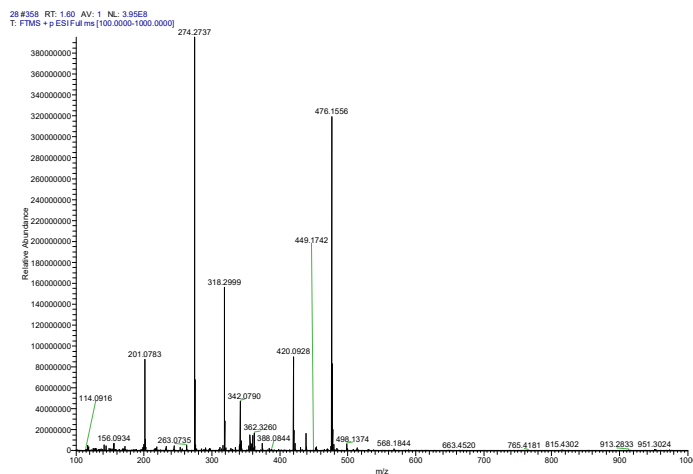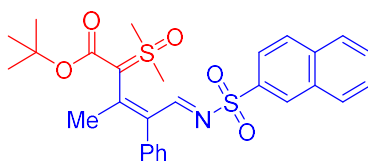

***tert-Butyl (Z)-2-(dimethyl(oxo)- $\lambda^6$ -sulfaneylidene)-3-methyl-4-(naphthalene-2-sulfonamido)-4-phenylbut-3-enoate (5ad)***

Prepared according to general procedure from [(CuOTf)<sub>2</sub>•PhMe (5.2 mg, 0.01 mmol, 5 mol%), **L5** (11.4 mg, 0.024 mmol, 12 mol%), tert-butyl 2-(dimethyl(oxo)- $\lambda^6$ -sulfaneylidene)acetate (38.4 mg, 0.2 mmol, 1.0 equiv), 5-ethynyl-3-(naphthalen-2-ylsulfonyl)-5-phenyloxazolidin-2-one (150.8 mg, 0.4 mmol, 2.0 equiv), Me<sub>2</sub>NEt (17.6 mg, 0.24 mmol, 1.2 equiv) in DCM (4.0 mL) at RT for 2 h. The desired product was purified by silica gel column chromatography (petroleum ether/ethyl acetate = 2:1-1:2) and obtained as a yellow oil (78.4 mg, 75%).

**R<sub>f</sub>** (petroleum ether/ethyl acetate = 1:1) = 0.4.

**<sup>1</sup>H NMR** (400 MHz, DMSO-*d*<sub>6</sub>)  $\delta$  8.89 (s, 1H), 8.52 – 8.46 (m, 1H), 8.16 – 8.04 (m, 3H), 7.77 – 7.67 (m, 3H), 7.36 – 7.32 (m, 2H), 7.30 – 7.25 (m, 1H), 7.07 – 7.04 (m, 2H), 3.62 (s, 6H), 2.02 (s, 3H), 1.40 (s, 9H).

**<sup>13</sup>C NMR** (101 MHz, DMSO-*d*<sub>6</sub>)  $\delta$  170.5, 164.2, 157.1, 137.5, 136.6, 136.5, 134.9, 132.1, 130.3, 129.79, 129.76, 129.6, 128.7, 128.6, 128.3, 128.1, 127.6, 123.0, 79.6, 75.8, 45.2, 28.8, 24.8.

**HRMS (ESI)** m/z: [M+H]<sup>+</sup> Calcd for C<sub>27</sub>H<sub>32</sub>NO<sub>5</sub>S<sub>2</sub> 526.1716; Found 526.1714.

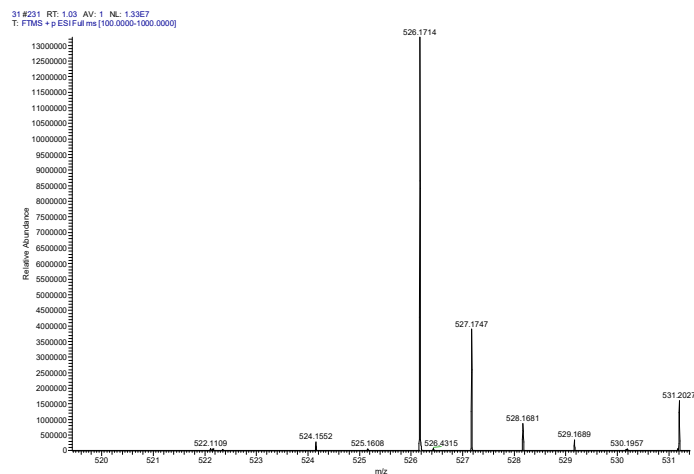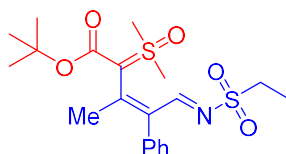

***tert-Butyl (Z)-2-(dimethyl(oxo)- $\lambda^6$ -sulfaneylidene)-4-(ethylsulfonamido)-3-methyl-4-phenylbut-3-enoate (5ae)***

Prepared according to general procedure from [(CuOTf)<sub>2</sub>•PhMe (5.2 mg, 0.01 mmol, 5 mol%), **L5** (11.4 mg, 0.024 mmol, 12 mol%), tert-butyl 2-(dimethyl(oxo)- $\lambda^6$ -sulfaneylidene)acetate (38.4 mg, 0.2 mmol, 1.0 equiv), 3-(ethylsulfonyl)-5-ethynyl-5-phenyloxazolidin-2-one (111.6 mg, 0.4 mmol, 2.0 equiv), Me<sub>2</sub>NEt (17.6 mg, 0.24 mmol, 1.2 equiv) in DCM (4.0 mL) at RT for 2 h. The desired product was purified by silica gel column chromatography (petroleum ether/ethyl acetate = 5:1-1:1) and obtained as a yellow oil (62.8 mg, 74%).

**R<sub>f</sub>** (petroleum ether/ethyl acetate = 1:1) = 0.5.

**<sup>1</sup>H NMR** (400 MHz, DMSO-*d*<sub>6</sub>)  $\delta$  8.79 (s, 1H), 7.41 – 7.38 (m, 2H), 7.33 – 7.29 (m, 1H), 7.14 – 7.11 (m, 2H), 3.63 (s, 6H), 3.03 (q, *J* = 7.2 Hz, 2H), 2.02 (s, 3H), 1.42 (s, 9H), 1.11 (t, *J* = 7.2 Hz, 3H).

**<sup>13</sup>C NMR** (101 MHz, DMSO-*d*<sub>6</sub>)  $\delta$  171.8, 164.3, 155.6, 137.7, 136.8, 130.4, 128.6, 127.6, 79.5, 74.5, 49.2, 46.7, 28.8, 24.7, 8.2.

**HRMS (ESI)** *m/z*: [M+H]<sup>+</sup> Calcd for C<sub>20</sub>H<sub>30</sub>NO<sub>5</sub>S<sub>2</sub> 428.1560; Found 428.1558.

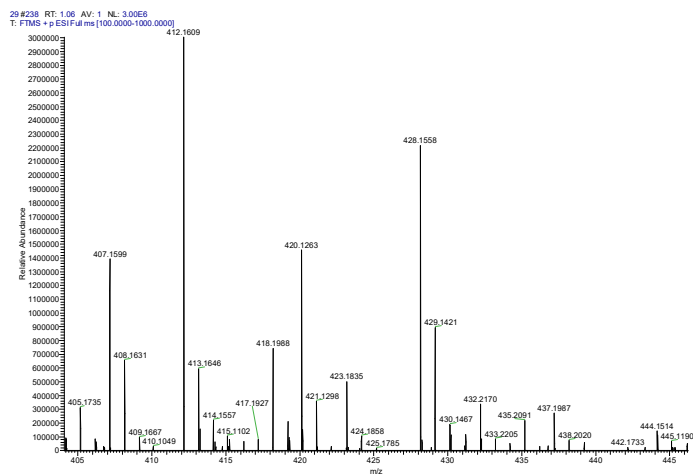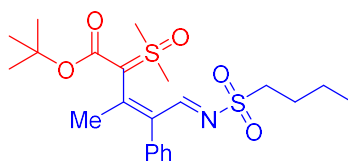

***tert-Butyl (Z)-4-(butylsulfonamido)-2-(dimethyl(oxo)- $\lambda^6$ -sulfaneylidene)-3-methyl-4-phenylbut-3-enoate (5af)***

Prepared according to general procedure from [(CuOTf)<sub>2</sub>•PhMe (5.2 mg, 0.01 mmol, 5 mol%), **L5** (11.4 mg, 0.024 mmol, 12 mol%), tert-butyl 2-(dimethyl(oxo)- $\lambda^6$ -sulfaneylidene)acetate (38.4 mg, 0.2 mmol, 1.0 equiv), 3-(butylsulfonyl)-5-ethynyl-5-phenyloxazolidin-2-one (122.8 mg, 0.4 mmol, 2.0 equiv), Me<sub>2</sub>NEt (17.6 mg, 0.24 mmol, 1.2 equiv) in DCM (4.0 mL) at RT for 2 h. The desired product was purified by silica gel column chromatography (petroleum ether/ethyl acetate = 5:1-1:1) and obtained as a yellow oil (73.4 mg, 81%).

**R<sub>f</sub>** (petroleum ether/ethyl acetate = 1:1) = 0.6.

**<sup>1</sup>H NMR** (400 MHz, DMSO-*d*<sub>6</sub>)  $\delta$  8.80 (s, 1H), 7.41 – 7.37 (m, 2H), 7.33 – 7.29 (m, 1H), 7.14 – 7.11 (m, 2H), 3.63 (s, 6H), 3.04 – 3.00 (m, 2H), 2.02 (s, 3H), 1.59 – 1.51 (m, 2H), 1.42 (s, 9H), 1.33 (q, *J* = 7.2 Hz, 2H), 0.84 (t, *J* = 7.2 Hz, 3H).

**<sup>13</sup>C NMR** (101 MHz, DMSO-*d*<sub>6</sub>)  $\delta$  171.6, 164.3, 155.5, 137.7, 136.9, 130.4, 128.6, 127.6, 79.4, 74.5, 51.9, 43.8, 28.8, 25.2, 24.7, 21.2, 13.9.

**HRMS (ESI)** *m/z*: [M+H]<sup>+</sup> Calcd for C<sub>21</sub>H<sub>34</sub>NO<sub>5</sub>S<sub>2</sub> 456.1873; Found 456.1873.

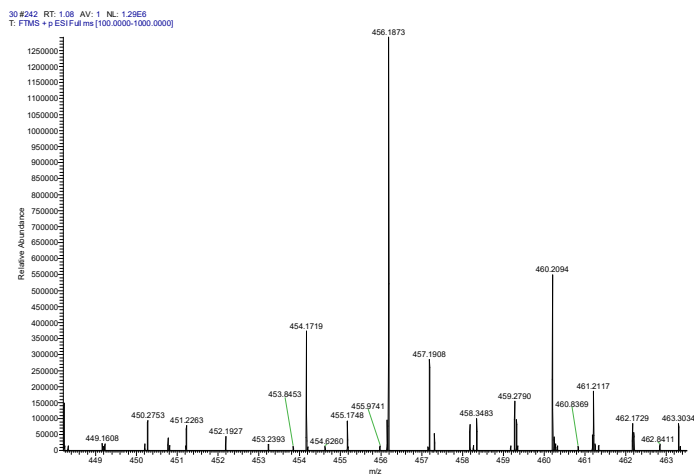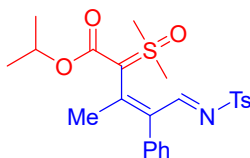

***Isopropyl (Z)-2-(dimethyl(oxo)- $\lambda^6$ -sulfaneylidene)-3-methyl-4-((4-methylphenyl)sulfonamido)-4-phenylbut-3-enoate (5ba)***

Prepared according to general procedure from [(CuOTf)<sub>2</sub>•PhMe (5.2 mg, 0.01 mmol, 5 mol%), **L5** (11.4 mg, 0.024 mmol, 12 mol%), isopropyl 2-(dimethyl(oxo)- $\lambda^6$ -sulfaneylidene)acetate (35.6 mg, 0.2 mmol, 1.0 equiv), 5-ethynyl-5-phenyl-3-tosyloxazolidin-2-one (136.4 mg, 0.4 mmol, 2.0 equiv), Me<sub>2</sub>NEt (17.6 mg, 0.24 mmol, 1.2 equiv) in DCM (4.0 mL) at RT for 2 h. The desired product was purified by silica gel column chromatography (petroleum ether/ethyl acetate = 2:1-1:2) and obtained as a yellow solid (66.6 mg, 70%), mp: 142.3-144.3 °C.

**R<sub>f</sub>** (ethyl acetate) = 0.5.

**<sup>1</sup>H NMR** (400 MHz, DMSO-*d*<sub>6</sub>)  $\delta$  8.77 (s, 1H), 7.69 – 7.60 (m, 2H), 7.39 – 7.34 (m, 4H), 7.31 – 7.27 (m, 1H), 7.06 – 7.03 (m, 2H), 4.88 (p, *J* = 6.2 Hz, 1H), 3.62 (s, 6H), 2.37 (s, 3H), 2.01 (s, 3H), 1.17 (d, *J* = 6.2 Hz, 6H).

**<sup>13</sup>C NMR** (101 MHz, DMSO-*d*<sub>6</sub>)  $\delta$  170.0, 164.0, 156.1, 144.1, 137.3, 137.1, 136.2, 130.3, 130.2, 128.6, 127.7, 74.1, 66.5, 43.2, 24.7, 22.4, 21.5.

**HRMS (ESI)** *m/z*: [M+H]<sup>+</sup> Calcd for C<sub>24</sub>H<sub>30</sub>NO<sub>5</sub>S<sub>2</sub> 476.1560; Found 476.1561.

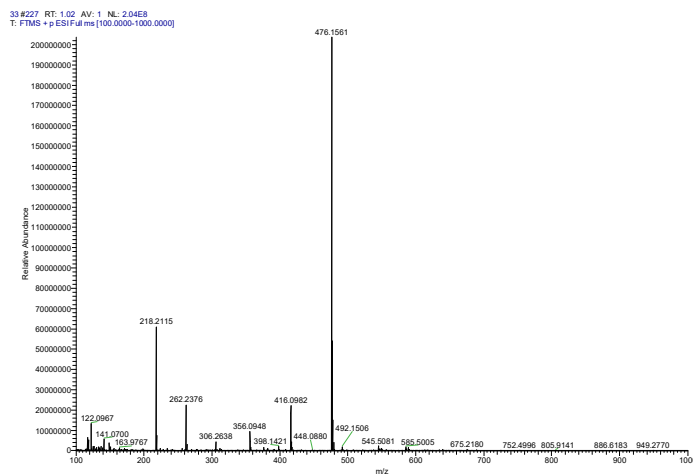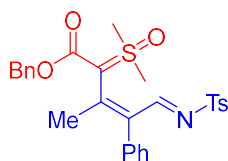

***Benzyl (Z)-2-(dimethyl(oxo)- $\lambda^6$ -sulfaneylidene)-3-methyl-4-((4-methylphenyl)sulfonamido)-4-phenylbut-3-enoate (5ca)***

Prepared according to general procedure from [(CuOTf)<sub>2</sub>•PhMe (5.2 mg, 0.01 mmol, 5 mol%), **L5** (11.4 mg, 0.024 mmol, 12 mol%), benzyl 2-(dimethyl(oxo)- $\lambda^6$ -sulfaneylidene)acetate (45.2 mg, 0.2 mmol, 1.0 equiv), 5-ethynyl-5-phenyl-3-tosyloxazolidin-2-one (136.4 mg, 0.4 mmol, 2.0 equiv), Me<sub>2</sub>NEt (17.6 mg, 0.24 mmol, 1.2 equiv) in DCM (2.0 mL) at RT for 2 h. The desired product was purified by silica gel column chromatography (petroleum ether/ethyl acetate = 2:1-1:2) and obtained as a yellow oil (61.6 mg, 59%).

**R<sub>f</sub>** (ethyl acetate) = 0.6.

**<sup>1</sup>H NMR** (400 MHz, DMSO-*d*<sub>6</sub>)  $\delta$  8.83 (s, 1H), 7.66 – 7.60 (m, 2H), 7.36 – 7.28 (m, 10H), 7.04 – 7.02 (m, 2H), 5.07 (s, 2H), 3.63 (s, 6H), 2.35 (s, 3H), 2.01 (s, 3H).

**<sup>13</sup>C NMR** (101 MHz, DMSO-*d*<sub>6</sub>)  $\delta$  170.3, 164.0, 155.7, 144.2, 137.8, 137.4, 137.1, 135.9, 130.3, 130.2, 129.7, 128.8, 128.6, 128.2, 128.0, 127.8, 73.7, 64.9, 42.8, 24.9, 21.5.

**HRMS (ESI)** m/z: [M+H]<sup>+</sup> Calcd for C<sub>28</sub>H<sub>30</sub>NO<sub>5</sub>S<sub>2</sub> 524.1560; Found 524.1561.

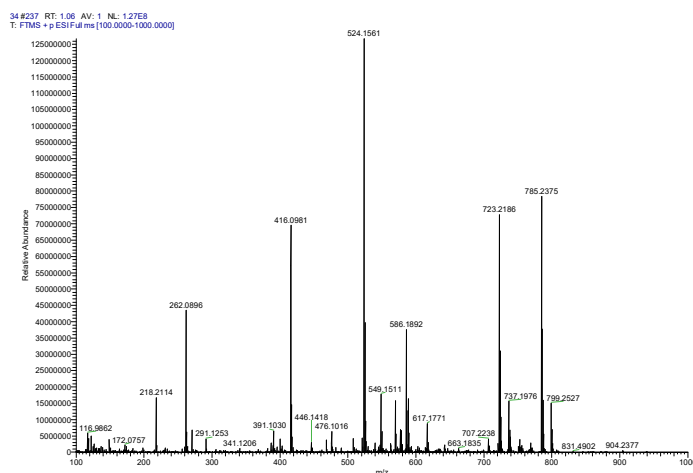

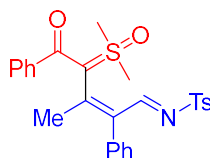

**(Z)-N-(3-(Dimethyl(oxo)-λ<sup>6</sup>-sulfaneylidene)-2-methyl-4-oxo-1,4-diphenylbut-1-en-1-yl)-4-methylbenzenesulfonamide (5da)**

Prepared according to general procedure from Cu(OTf)<sub>2</sub> (7.2 mg, 0.02 mmol, 10 mol%), **L5** (11.4 mg, 0.024 mmol, 12 mol%), 2-(dimethyl(oxo)-λ<sup>6</sup>-sulfaneylidene)-1-phenylethan-1-one (39.2 mg, 0.2 mmol, 1.0 equiv), 5-ethynyl-5-phenyl-3-tosyloxazolidin-2-one (136.4 mg, 0.4 mmol, 2.0 equiv), Et<sub>3</sub>N (24.3 mg, 0.24 mmol, 1.2 equiv) in cyclohexane/DCM (v/v = 4:1, 4.0 mL) at RT for 4 h. The desired product was purified by silica gel column chromatography (petroleum ether/ethyl acetate = 1:1-1:5) and obtained as a yellow oil (70.4 mg, 71%).

R<sub>f</sub> (ethyl acetate) = 0.6

<sup>1</sup>H NMR (400 MHz, Chloroform-*d*) δ 9.16 (s, 1H), 7.72 – 7.64 (m, 2H), 7.56 – 7.53 (m, 2H), 7.39 – 7.32 (m, 2H), 7.31 – 7.27 (m, 3H), 7.26 – 7.21 (m, 3H), 7.01 – 6.98 (m, 2H), 3.77 (s, 3H), 3.70 (s, 3H), 2.39 (s, 3H), 1.87 (s, 3H).

<sup>13</sup>C NMR (101 MHz, Chloroform-*d*) δ 184.7, 169.7, 152.3, 143.7, 143.1, 140.3, 140.1, 136.1, 136.0, 130.6, 129.6, 129.5, 128.3, 128.1, 127.6, 127.5, 86.6, 43.9, 43.0, 26.6, 21.6.

HRMS (ESI) m/z: [M+H]<sup>+</sup> Calcd for C<sub>27</sub>H<sub>28</sub>NO<sub>4</sub>S<sub>2</sub> 494.1454; Found 494.1454.

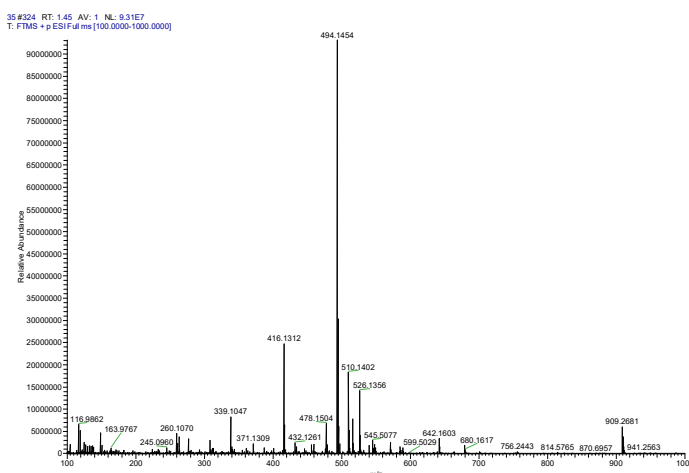

**Gram-scale reaction**

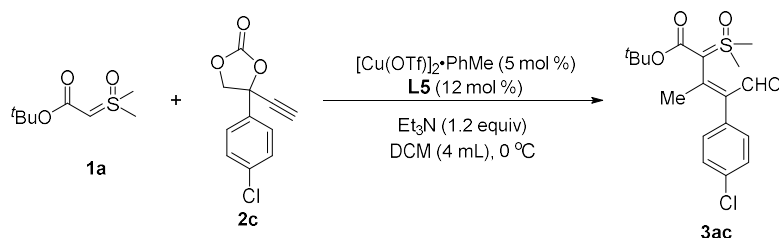

To a dry Schlenk tube were added [(CuOTf)<sub>2</sub>•PhMe] (103 mg, 0.2 mmol, 5 mol%), **L5** (228 mg, 0.48 mmol, 12 mol%) and dry DCM (15 mL). The resulting mixture was stirred at room temperature for 0.5 h. Then **1a** (0.77 g, 4 mmol, 1.0 equiv), **2c** (2.67 g, 12 mmol, 3.0 equiv),

Et<sub>3</sub>N (0.49 g, 4.8 mmol, 1.2 equiv) and dry DCM (50 mL) were added sequentially to the above solution at room temperature. The resulting mixture was stirred at 0 °C for 16 h. Then, the mixture was quenched with water and extracted with DCM. The combined organic layer was dried over anhydrous Na<sub>2</sub>SO<sub>4</sub>. The solid was filtered and the solvent was removed. The residue was purified by silica gel column chromatography (petroleum ether/ethyl acetate = 3:1-1:2) and **3ac** was obtained as a yellow solid (0.99 g, 67%).

### Gram-scale and Further transformations

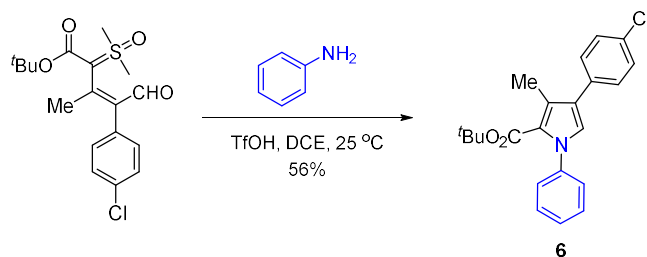

#### *tert-Butyl 4-(4-chlorophenyl)-3-methyl-1-phenyl-1H-pyrrole-2-carboxylate (6)*

To a dry Schlenk tube were added **3ac** (37.0 mg, 0.1 mmol, 1.0 equiv.), aniline (11.0 mg, 0.12 mmol, 1.2 equiv.), TfOH (4.5 mg, 0.03 mmol, 0.3 equiv) and DCE (1 mL). The reaction was stirred at RT for 20 minutes. The reaction mixture was concentrated under vacuum; the crude residue was purified by silica gel column chromatography (eluent: petroleum ether/ethyl acetate = 30:1-10:1) to give **6** as colorless oil (20.6 mg, 56%).

**R<sub>f</sub>** (petroleum ether/ethyl acetate = 10:1) = 0.5.

**<sup>1</sup>H NMR** (400 MHz, Chloroform-*d*) δ 7.44 – 7.40 (m, 2H), 7.38 – 7.28 (m, 7H), 6.88 (s, 1H), 2.44 (s, 3H), 1.29 (s, 9H).

**<sup>13</sup>C NMR** (101 MHz, Chloroform-*d*) δ 160.5, 141.6, 133.4, 132.2, 129.7, 128.7, 128.6, 127.4, 127.3, 126.0, 125.8, 125.1, 123.1, 80.7, 28.0, 11.9.

**HRMS (ESI)** *m/z*: [M+H]<sup>+</sup> Calcd for C<sub>22</sub>H<sub>23</sub>ClNO<sub>2</sub> 368.1412; Found 368.1409.

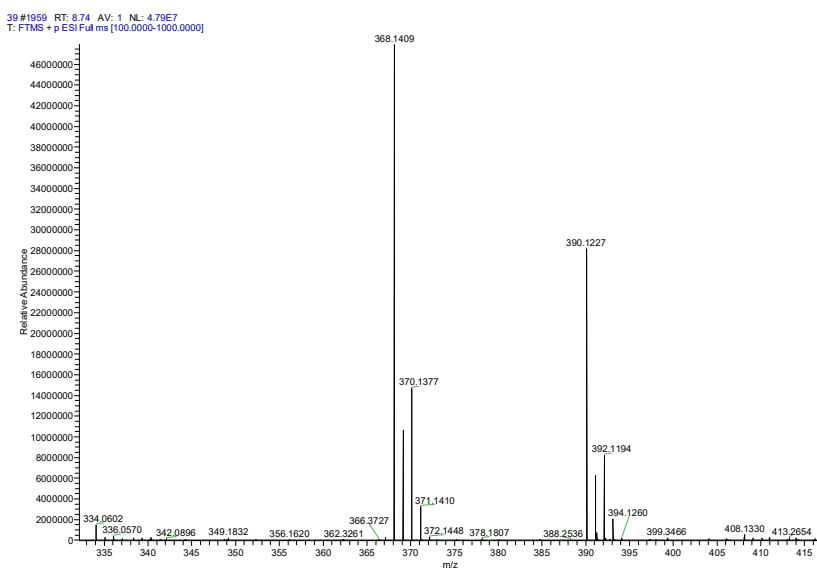

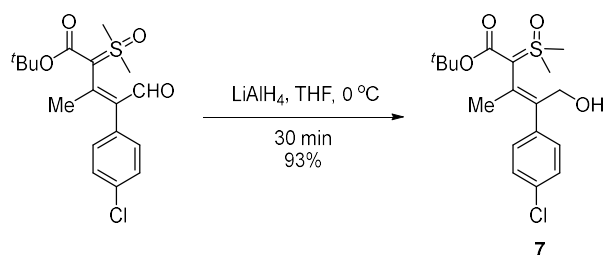

***tert-Butyl (Z)-4-(4-chlorophenyl)-2-(dimethyl(oxo)- $\lambda^6$ -sulfaneylidene)-5-hydroxy-3-methylpent-3-enoate (7)***

To a dry Schlenk tube were added LiAlH<sub>4</sub> (22.8 mg, 0.6 mmol, 3.0 equiv) and THF (1 mL) under Ar. Next, a solution of **3ac** (74.0 mg, 0.2 mmol, 1.0 equiv) in 3 mL of THF was slowly added dropwise to the reaction medium at 0 °C. The reaction was stirred for 30 min. After this time, quenched with NH<sub>4</sub>Cl and filtered out the solid, the filtrate was extracted with EtOAc. The organic layer was washed with brine, dried over Na<sub>2</sub>SO<sub>4</sub>, concentrated and purified by flash chromatography on silica gel to give **7** as colorless oil (69.2 mg, 93%).

R<sub>f</sub> (ethyl acetate) = 0.5.

<sup>1</sup>H NMR (400 MHz, Chloroform-*d*)  $\delta$  7.39 – 7.29 (m, 2H), 7.25 – 7.12 (m, 2H), 4.28 (s, 2H), 3.46 (s, 6H), 2.66 (s, 1H), 1.78 (s, 3H), 1.49 (s, 9H).

<sup>13</sup>C NMR (101 MHz, Chloroform-*d*)  $\delta$  165.9, 143.7, 140.1, 132.6, 123.0, 128.4, 79.0, 65.9, 42.8, 28.9, 23.8.

HRMS (ESI) m/z: [M+H]<sup>+</sup> Calcd for C<sub>18</sub>H<sub>26</sub>ClO<sub>4</sub>S 373.1235; Found 373.1234.

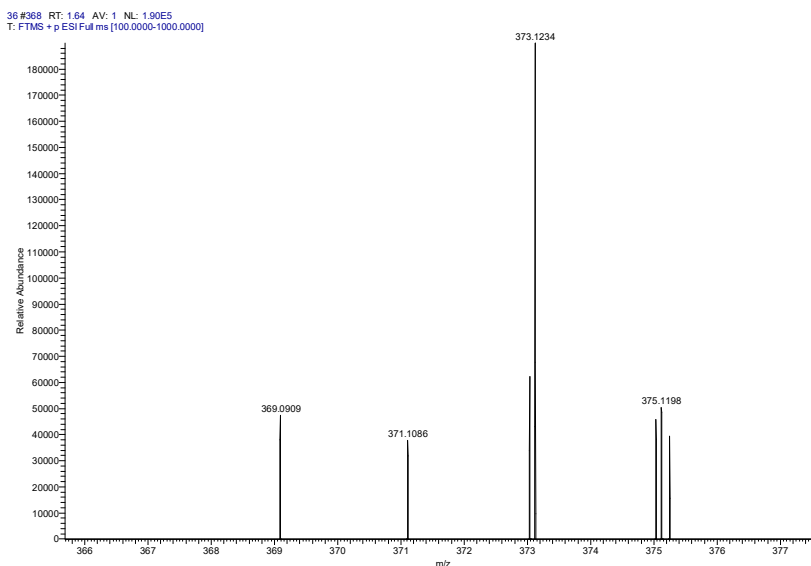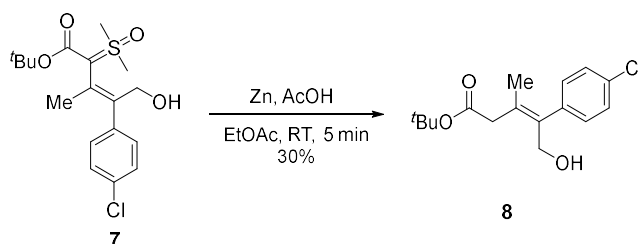

***tert-Butyl (Z)-4-(4-chlorophenyl)-5-hydroxy-3-methylpent-3-enoate (8)***

To a dry Schlenk tube, AcOH (260 mg, 2.0 mmol, 20.0 equiv) was added to a stirred mixture of **7** (74.4 mg, 0.2 mmol, 1.0 equiv) and Zn dust (240 mg, 2.0 mmol, 20.0 equiv) in EtOAc (2.0 mL) at room temperature. The reaction mixture was stirred overnight and filtered. The filtrate was washed with saturated NaHCO<sub>3</sub> solution and evaporate under vacuum. The crude product was purified by flash chromatography over silica gel using (petroleum ether / ethyl acetate = 10:1-3:1) to give **8** as colorless oil (17.8 mg, 30%).

**R<sub>f</sub>** (petroleum ether/ethyl acetate = 3:1) = 0.5.

**<sup>1</sup>H NMR** (400 MHz, Chloroform-*d*) δ 7.33 – 7.30 (m, 2H), 7.21 – 7.18 (m, 2H), 4.30 (d, *J* = 5.2 Hz, 2H), 3.23 (s, 2H), 2.84 (s, 1H), 1.69 (s, 3H), 1.48 (s, 9H).

**<sup>13</sup>C NMR** (101 MHz, Chloroform-*d*) δ 171.8, 140.1, 138.6, 132.6, 130.6, 130.0, 128.4, 82.0, 63.9, 41.2, 28.0, 21.2.

**HRMS (ESI)** *m/z*: [M+Na]<sup>+</sup> Calcd for C<sub>16</sub>H<sub>21</sub>ClNaO<sub>3</sub> 319.1071; Found 319.1069.

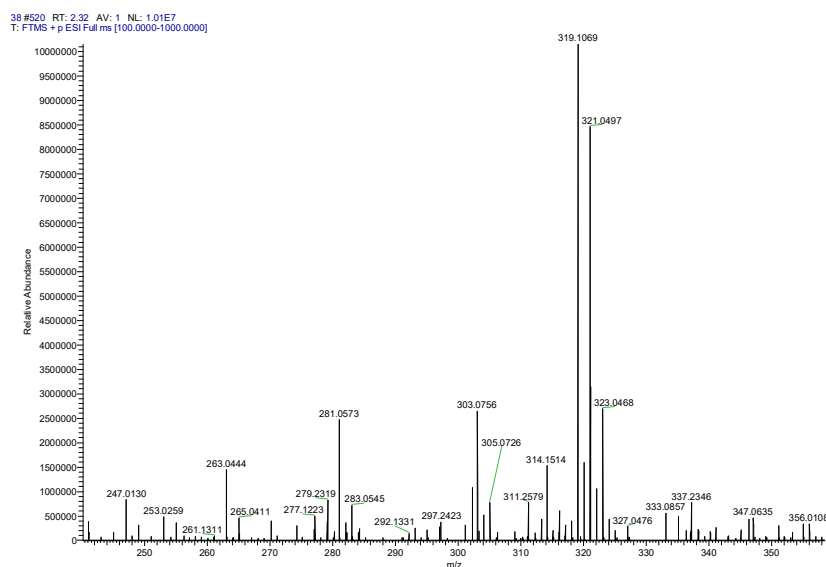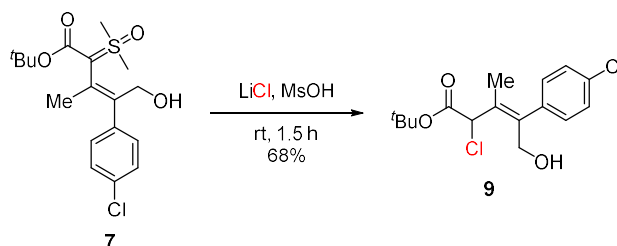

***tert*-Butyl (Z)-2-chloro-4-(4-chlorophenyl)-5-hydroxy-3-methylpent-3-enoate (**9**)**

To stirred solution of ylide **7** (74.4 mg, 0.2 mmol, 1.0 equiv.) in dry THF (2 mL) at 0 °C was added LiCl (9.3 mg, 0.22 mmol, 1.1 equiv.) and methanesulfonic acid (21.1 mg, 0.22 mmol, 1.1 equiv.). The reaction was stirred continued for 3 hours. After completion of the reaction, the mixture was evaporated under reduced pressure and dissolved in water. The crude mixture was extracted with EtOAc, dried over anhydrous Na<sub>2</sub>SO<sub>4</sub> and solvent removed under reduced pressure. The crude product was purified by column chromatography (petroleum ether / ethyl acetate = 10:1-3:1) to afford **9** as colorless oil (44.9 mg, 68%).

**R<sub>f</sub>** (petroleum ether/ethyl acetate = 3:1) = 0.3.

$^1\text{H NMR}$  (400 MHz, Chloroform-*d*)  $\delta$  7.37 – 7.32 (m, 4H), 6.12 (s, 1H), 4.05 (d,  $J$  = 11.2 Hz, 1H), 3.93 (d,  $J$  = 11.2 Hz, 1H), 3.12 (s, 1H), 1.94 (s, 3H), 1.49 (s, 9H).

$^{13}\text{C NMR}$  (101 MHz, Chloroform-*d*)  $\delta$  166.3, 156.0, 139.7, 133.8, 128.7, 127.6, 118.3, 80.6, 79.4, 66.8, 28.2, 15.1.

**HRMS (ESI)**  $m/z$ :  $[\text{M}+\text{Na}]^+$  Calcd for  $\text{C}_{16}\text{H}_{20}\text{Cl}_2\text{NaO}_3$  353.0682; Found 353.0677.

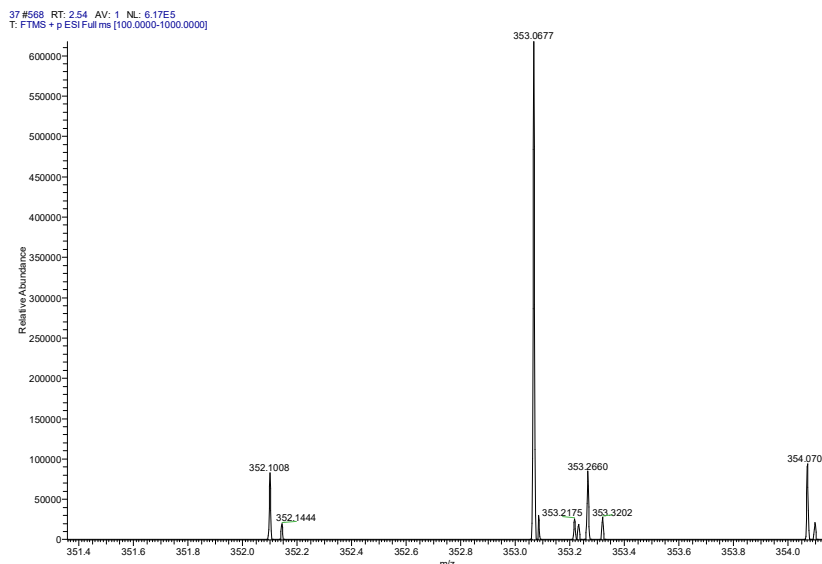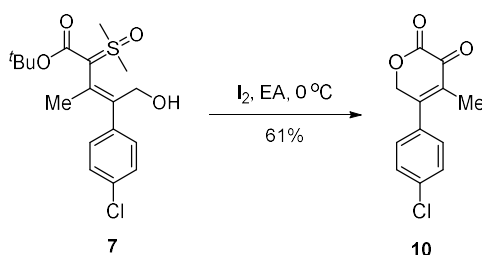

#### **5-(4-Chlorophenyl)-4-methyl-2H-pyran-2,3(6H)-dione (10)**

To a dry Schlenk tube were added **7** (74.4, 0.2 mmol, 1.0 equiv.), Iodine (50.8 mg, 0.2 mmol, 1.0 equiv.) and EtOAc (2 mL). The reaction was stirred at 0 °C for 10 minutes. Next, the reaction mixture was washed with a saturated solution of sodium thiosulfate. The organic phase was then concentrated under reduced pressure to furnish the crude product, that was purified by silica gel column chromatography to give **10** as colorless oil (29.0 mg, 61%).

$R_f$  (petroleum ether/ethyl acetate = 1:1) = 0.6.

$^1\text{H NMR}$  (400 MHz, Chloroform-*d*)  $\delta$  7.42 – 7.36 (m, 2H), 7.29 – 7.25 (m, 2H), 4.28 – 4.13 (m, 2H), 2.04 (s, 3H).

$^{13}\text{C NMR}$  (101 MHz, Chloroform-*d*)  $\delta$  171.1, 169.5, 135.4, 133.1, 129.4, 126.7, 93.8, 84.7, 64.1, 16.7.

**HRMS (ESI)**  $m/z$ :  $[\text{M}+\text{H}]^+$  Calcd for  $\text{C}_{12}\text{H}_{10}\text{ClO}_3$  237.0313; Found 237.0307.

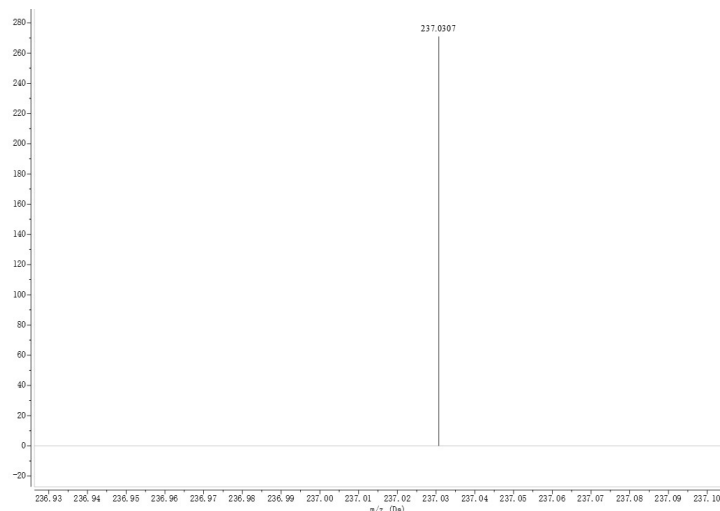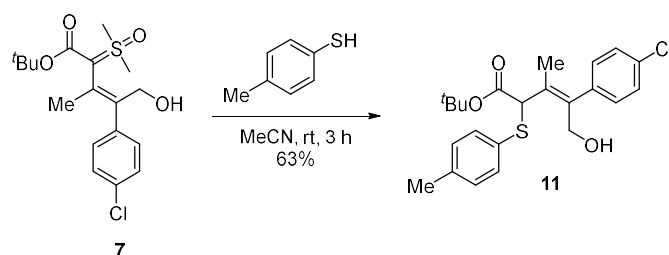

***tert-Butyl (Z)-4-(4-chlorophenyl)-5-hydroxy-3-methyl-2-(p-tolylthio)pent-3-enoate (11)***

To a flask were added **7** (74.4 mg, 0.2 mmol, 1.0 equiv.), 4-Methylbenzenethiol (49.7 mg, 0.4 mmol, 2.0 equiv) and MeCN (4.0 mL). The reaction mixture was stirred at rt for 3h. The reaction mixture was concentrated under vacuum; the crude residue was purified by silica gel column chromatography (eluent: petroleum ether/ethyl acetate = 15:1-5:1) to give **11** as white solid (52.3 mg, 63%), mp:126.5-128.5 °C.

**R<sub>f</sub>** (petroleum ether/ethyl acetate = 3:1) = 0.3.

**<sup>1</sup>H NMR** (400 MHz, Chloroform-*d*) δ 7.42 (d, *J* = 8.0 Hz, 2H), 7.29 (d, *J* = 8.4 Hz, 2H), 7.17 (d, *J* = 8.0 Hz, 2H), 6.98 (d, *J* = 8.4 Hz, 2H), 5.02 (s, 1H), 4.03 (d, *J* = 12.8 Hz, 1H), 3.87 (d, *J* = 12.8 Hz, 1H), 2.35 (s, 3H), 1.72 (s, 3H), 1.49 (s, 9H).

**<sup>13</sup>C NMR** (101 MHz, Chloroform-*d*) δ 168.7, 139.9, 139.6, 139.0, 134.7, 132.9, 131.5, 129.9, 129.8, 129.5, 128.5, 83.3, 62.9, 56.9, 27.9, 21.2, 16.3.

**HRMS (ESI)** *m/z*: [M+H]<sup>+</sup> Calcd for C<sub>23</sub>H<sub>27</sub>ClO<sub>3</sub>S 441.1262; Found 441.1260.

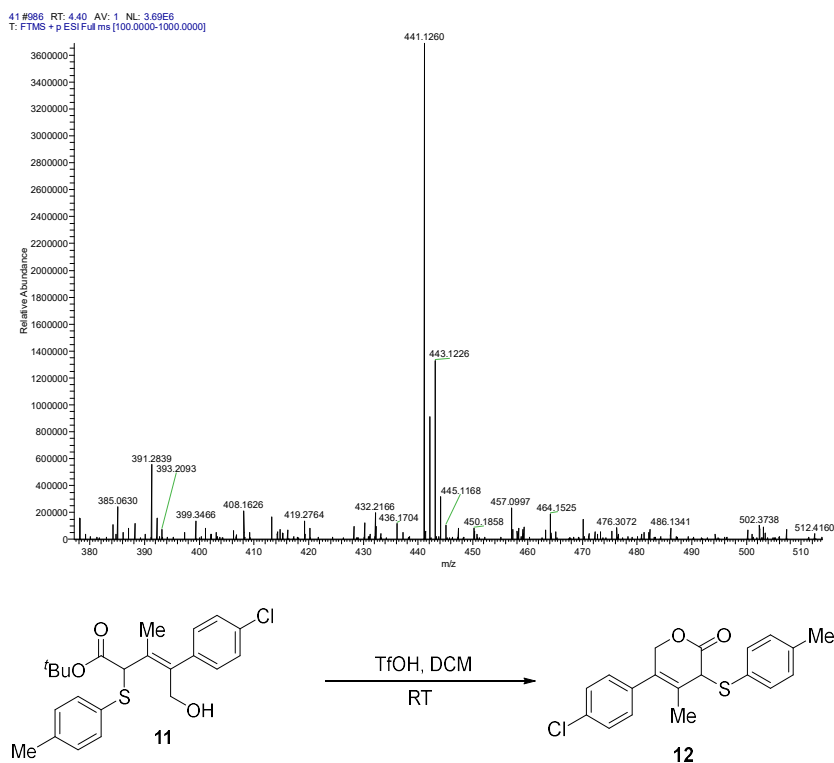

**5-(4-Chlorophenyl)-4-methyl-3-(p-tolylthio)-3,6-dihydro-2H-pyran-2-one (12)**

To a dry Schlenk tube were added **11** (41.8 mg, 0.1 mmol, 1.0 equiv.), TfOH (4.5 mg, 0.03 mmol, 0.3 equiv) and DCM (1 mL). The reaction was stirred at RT for 15 minutes. The reaction mixture was concentrated under vacuum; the crude residue was purified by silica gel column chromatography (eluent: petroleum ether/ethyl acetate = 15:1-5:1) to give **12** as white solid (31.3 mg, 91%), mp:174.2-176.2 °C.

$R_f$  (petroleum ether/ethyl acetate = 5:1) = 0.6.

<sup>1</sup>H NMR (400 MHz, Chloroform-*d*) δ 7.51 – 7.48 (m, 2H), 7.37 – 7.33 (m, 2H), 7.18 (d, *J* = 7.9 Hz, 2H), 7.00 – 6.97 (m, 2H), 4.52 (dp, *J* = 16.0, 1.6 Hz, 1H), 4.25 (dp, *J* = 16.0, 1.6 Hz, 1H), 3.99 (s, 1H), 2.38 (s, 3H), 1.88 (s, 3H).

<sup>13</sup>C NMR (101 MHz, Chloroform-*d*) δ 168.2, 140.4, 136.1, 134.4, 134.1, 132.2, 130.0, 129.7, 128.9, 127.0, 126.8, 71.3, 50.4, 21.4, 17.3.

HRMS (ESI) *m/z*: [M+H]<sup>+</sup> Calcd for C<sub>19</sub>H<sub>18</sub>ClO<sub>2</sub>S 345.0711; Found 345.0710.

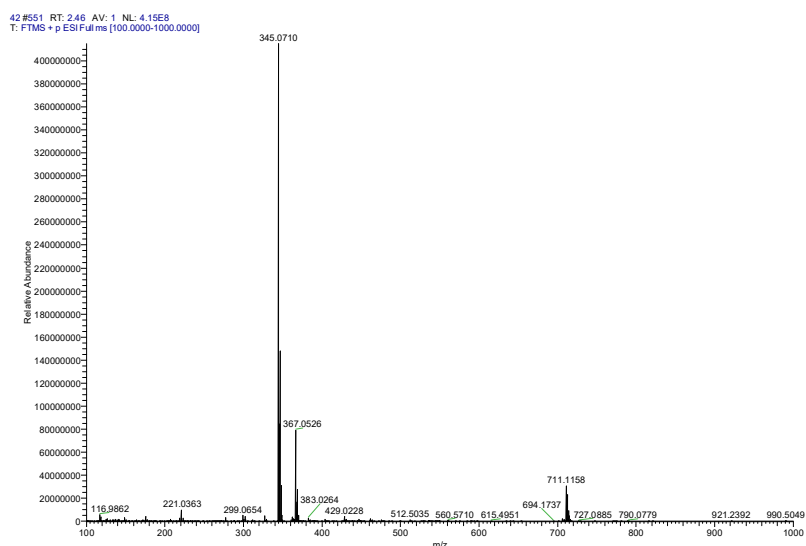

## Scheme 6 Control experiments

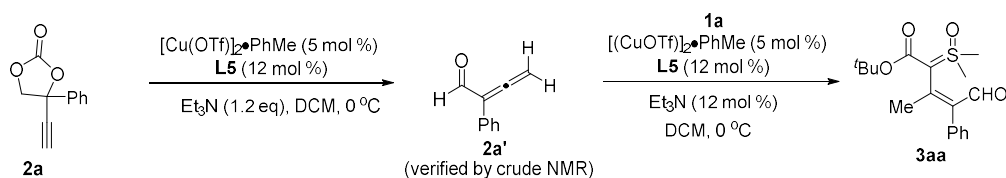

**Step 1:** To a dry Schlenk tube were added [(CuOTf)<sub>2</sub>•PhMe (52.0 mg, 0.1 mmol, 5 mol %), **L5** (114.0 mg, 0.12 mmol, 12 mol %) and dry DCM (1.0 mL). The resulting mixture was stirred at room temperature for 0.5 h. Then **2a** (3.0 mmol, 3.0 equiv), Et<sub>3</sub>N (243.0 mg, 1.2 mmol, 1.2 equiv) and dry DCM (3.0 mL) were added sequentially to the above solution at room temperature. The resulting mixture was stirred at 0 °C for 2 h. The reaction mixture was concentrated under vacuum and the allenic aldehyde **2a'** (extremely unstable) was verified by crude NMR (32% yield).

**Step 2:** **1a** (0.05 mmol, 1.0 equiv) and **2a'** (0.5 mmol, 10.0 equiv) were used as the substrates under different reaction conditions. The resulting mixture was stirred at 0 °C for 12 h. The reaction mixture was concentrated under vacuum; the crude residue was purified by silica gel column chromatography to give **3aa**. All the results were summarized in **Table S1**

**Table S1.** The controlled experiments of allenic aldehyde intermediate

| entry | Variation from “standard reaction conditions” | yield (%) <sup>b</sup> |
|-------|-----------------------------------------------|------------------------|
| 1     | w/o Et <sub>3</sub> N                         | 54                     |
| 2     | w/o [Cu]/ <b>L5</b>                           | 49                     |
| 3     | w/o <b>L5</b>                                 | 57                     |
| 4     | w/o [Cu]/ <b>L5</b> Et <sub>3</sub> N         | 62                     |

<sup>a</sup>Standard reaction conditions: **1a** (0.05 mmol), **S5** (1.0 mmol), [(CuOTf)<sub>2</sub>•PhMe (5 mol %), **L5** (12 mol %), Et<sub>3</sub>N

(0.12 mmol) in DCM (2 mL) at 0 °C under an argon atmosphere. <sup>b</sup>Isolated yields.

### X-ray crystallographic data

The crystal structures have been deposited at the Cambridge Crystallographic Data Centre:

CCDC 2388075, (for **3ab**) and CCDC 2473172, (for **5ab**). The data

can be obtained free of charge via the internet at <https://www.ccdc.cam.ac.uk/structures/>. The

measurements were performed on a Bruker D8 Venture diffractometer. The structure solution and refinement were processed by SHELXL (2018/3).

### X-ray crystallographic data of **3ab**

**Method of crystallization:** A solution of **3ab** in ethyl acetate and petroleum ether was evaporated the solvent slowly at room temperature.

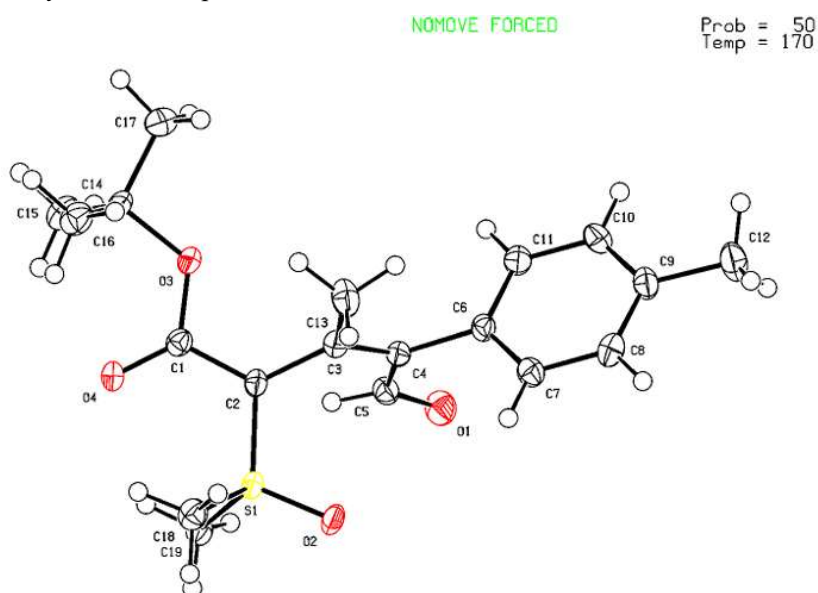

X-ray structure of **3ab**. Thermal ellipsoids are shown at the 50% level.

|                       |                                                  |
|-----------------------|--------------------------------------------------|
| Empirical formula     | C <sub>19</sub> H <sub>26</sub> O <sub>4</sub> S |
| Formula weight        | 350.46                                           |
| Temperature/K         | 170.00                                           |
| Crystal system        | monoclinic                                       |
| Space group           | P2 <sub>1</sub> /c                               |
| a/Å                   | 11.0456(2)                                       |
| b/Å                   | 5.83520(10)                                      |
| c/Å                   | 28.9629(5)                                       |
| α/°                   | 90                                               |
| β/°                   | 95.1620(10)                                      |
| γ/°                   | 90                                               |
| Volume/Å <sup>3</sup> | 1859.18(6)                                       |

|                                                |                                                            |
|------------------------------------------------|------------------------------------------------------------|
| Z                                              | 4                                                          |
| $\rho_{\text{calc}}/\text{cm}^3$               | 1.252                                                      |
| $\mu/\text{mm}^{-1}$                           | 1.112                                                      |
| F(000)                                         | 752.0                                                      |
| Crystal size/ $\text{mm}^3$                    | $0.17 \times 0.17 \times 0.05$                             |
| Radiation                                      | $\text{GaK}\alpha$ ( $\lambda = 1.34139$ )                 |
| $2\theta$ range for data collection/ $^\circ$  | 6.99 to 109.78                                             |
| Index ranges                                   | $-12 \leq h \leq 13, -7 \leq k \leq 7, -35 \leq l \leq 33$ |
| Reflections collected                          | 20574                                                      |
| Independent reflections                        | 3522 [Rint = 0.0516, Rsigma = 0.0352]                      |
| Data/restraints/parameters                     | 3522/0/224                                                 |
| Goodness-of-fit on F <sup>2</sup>              | 1.062                                                      |
| Final R indexes [ $I \geq 2\sigma(I)$ ]        | R1 = 0.0369, wR2 = 0.0880                                  |
| Final R indexes [all data]                     | R1 = 0.0468, wR2 = 0.0931                                  |
| Largest diff. peak/hole / $e \text{ \AA}^{-3}$ | 0.30/-0.40                                                 |

### X-ray crystallographic data of **5ab**

**Method of crystallization:** A solution of **5ab** in ethyl acetate and petroleum ether was evaporated the solvent slowly at room temperature.

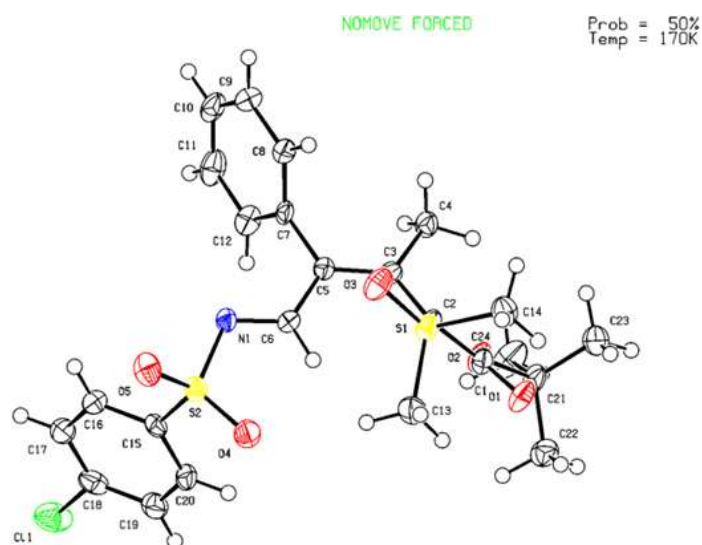

X-ray structure of **5ab**. Thermal ellipsoids are shown at the 50% level.

|                   |                                                     |
|-------------------|-----------------------------------------------------|
| Empirical formula | $\text{C}_{24}\text{H}_{28}\text{ClNO}_5\text{S}_2$ |
| Formula weight    | 510.04                                              |
| Temperature/K     | 170.00                                              |
| Crystal system    | monoclinic                                          |
| Space group       | P21/c                                               |
| a/ $\text{Å}$     | 12.4729(3)                                          |
| b/ $\text{Å}$     | 19.2544(4)                                          |
| c/ $\text{Å}$     | 11.3695(2)                                          |

|                                                |                                          |
|------------------------------------------------|------------------------------------------|
| $\alpha/^\circ$                                | 90                                       |
| $\beta/^\circ$                                 | 114.8330(10)                             |
| $\gamma/^\circ$                                | 90                                       |
| Volume/ $\text{\AA}^3$                         | 2478.01(9)                               |
| Z                                              | 4                                        |
| $\rho_{\text{calc}}/\text{cm}^3$               | 1.370                                    |
| $\mu/\text{mm}^{-1}$                           | 2.134                                    |
| F(000)                                         | 1076.0                                   |
| Crystal size/mm <sup>3</sup>                   | 0.17 × 0.17 × 0.05                       |
| Radiation                                      | GaK $\alpha$ ( $\lambda = 1.34139$ )     |
| 2 $\Theta$ range for data collection/ $^\circ$ | 6.794 to 109.866                         |
| Index ranges                                   | -15 ≤ h ≤ 14, -23 ≤ k ≤ 22, -13 ≤ l ≤ 13 |
| Reflections collected                          | 28262                                    |
| Independent reflections                        | 4699 [Rint = 0.1009, Rsigma = 0.0685]    |
| Data/restraints/parameters                     | 4699/0/304                               |
| Goodness-of-fit on F <sup>2</sup>              | 1.030                                    |
| Final R indexes [ $I \geq 2\sigma(I)$ ]        | R1 = 0.0484, wR2 = 0.1161                |
| Final R indexes [all data]                     | R1 = 0.0742, wR2 = 0.1289                |
| Largest diff. peak/hole / e $\text{\AA}^{-3}$  | 0.44/-0.74                               |

## References

1. (a) Gong, Y.; Wang, C.; Zhou, F.; Liao, K.; Wang, X. Y.; Sun, Y.; Zhang, Y. X.; Tu, Z.; Wang, X.; Zhou, J. *Angew. Chem. Int. Ed.* **2023**, *62*, e202301470. (b) Tsuji, T.; Tanaka, T.; Tanaka, T.; Yazaki, R.; Ohshima, T. *Org. Lett.* **2020**, *22*, 4164-4170. (c) Willis, O. G.; Petri, F.; Rosa, D. F.; Mandoil, A.; Pal, R.; Zinna, F.; Bari, L. D. *J. Am. Chem. Soc.* **2023**, *145*, 25170-25176. (d) Surgenor, R. R.; Liu, X.; Keenlyside, M. J. H.; Myers, W.; Smith, M. D. *Nat. Chem.* **2023**, *15*, 357-365.
2. (a) Janot, C.; Palamini, P.; Dobson, B. C.; Muir, J.; Aïssa, C. *Org. Lett.* **2019**, *21*, 296-299. (b) Zhang, Q.; Luo, C.; Lai, R.; Lin, Z.; Jia, P.; Xu, S.; Guo, L.; Wu, Y. *Green. Chem.* **2023**, *25*, 7068-7072.
3. (a) Zeng, Q.; Gao, F.; Buchholz, J. B.; Kleij, A. W. *ACS Catal.* **2023**, *13*, 7514-7522. (b) Gómez, J. E.; Cristòfol, À.; Kleij, A. W. *Angew. Chem. Int. Ed.* **2019**, *58*, 3903-3907.
4. (a) Xu, Y.; Hu, X. *Org. Lett.* **2019**, *21*, 8091-8096. (b) Duan, X.; Shi, H.; Yue, Y.; Song, W. *Chem. Commun.* **2024**, *60*, 3926-3929.

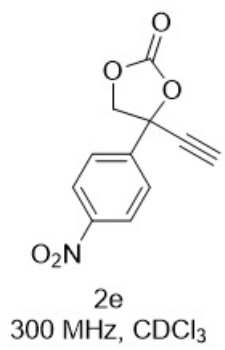

8.344  
8.314  
7.805  
7.775

4.900  
4.872  
4.515  
4.486

3.102

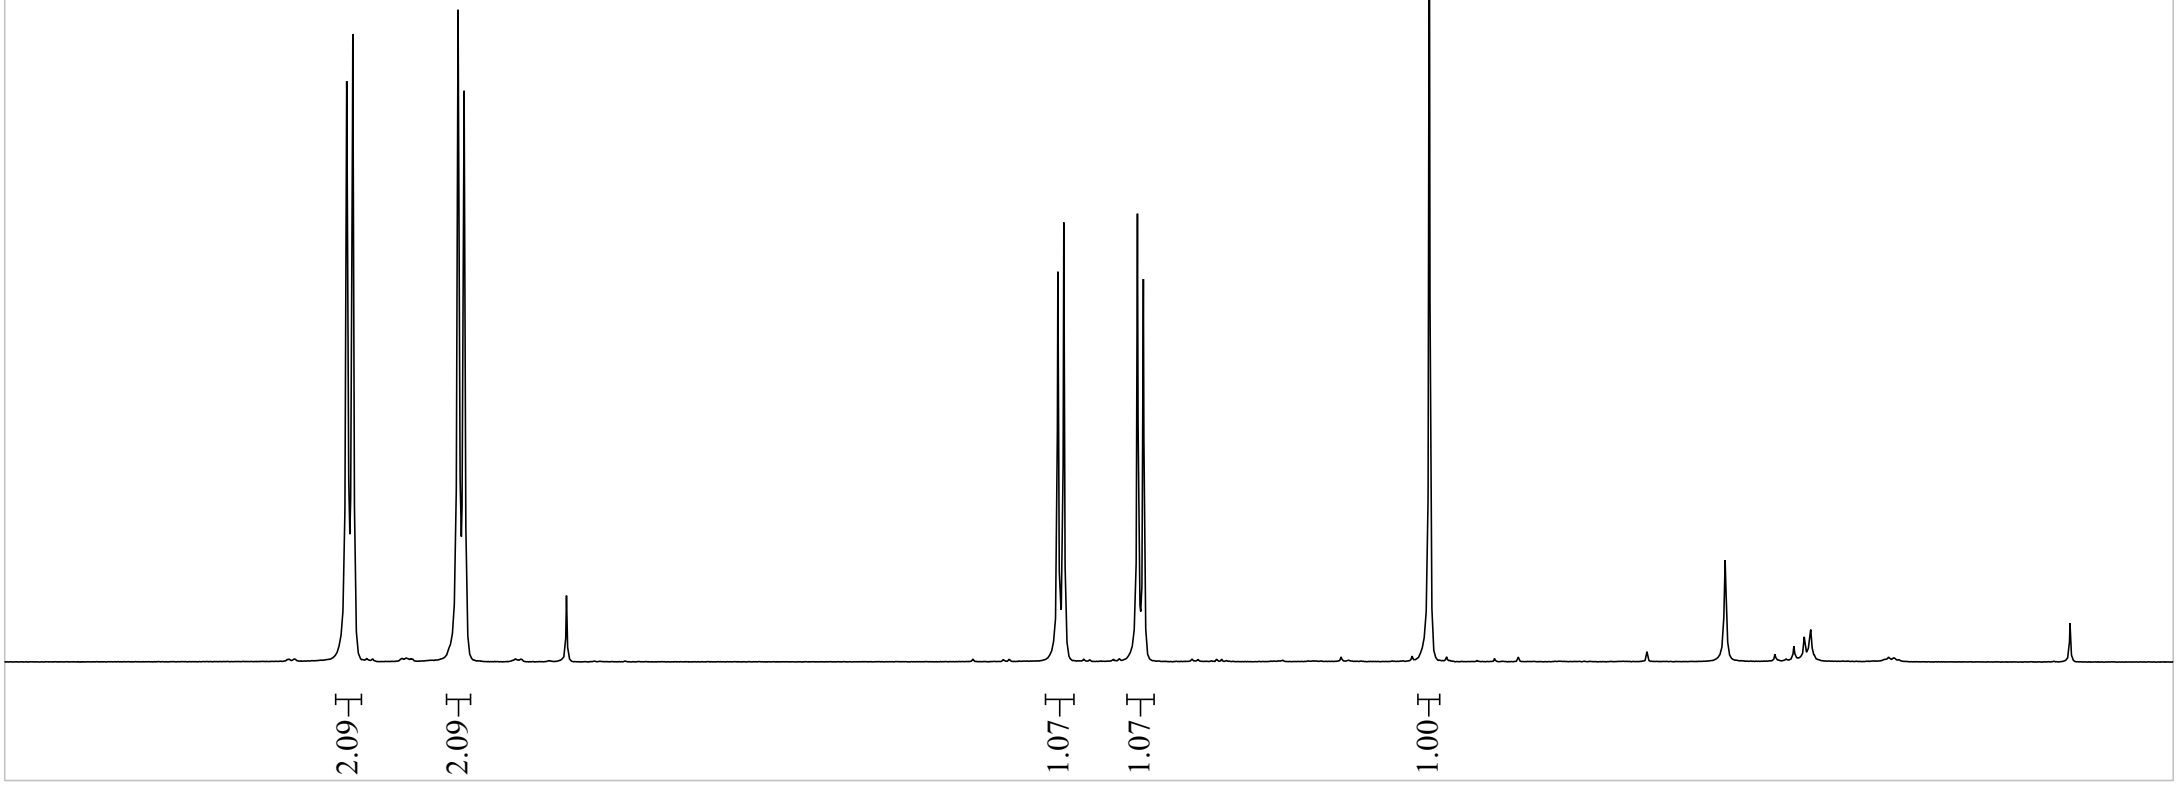

2.09

2.09

1.07

1.07

1.00

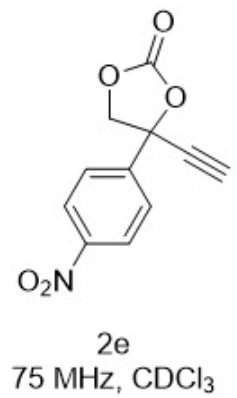

~152.77  
~148.71  
~143.32

~126.33  
~124.43

79.84  
78.79  
77.98  
76.66

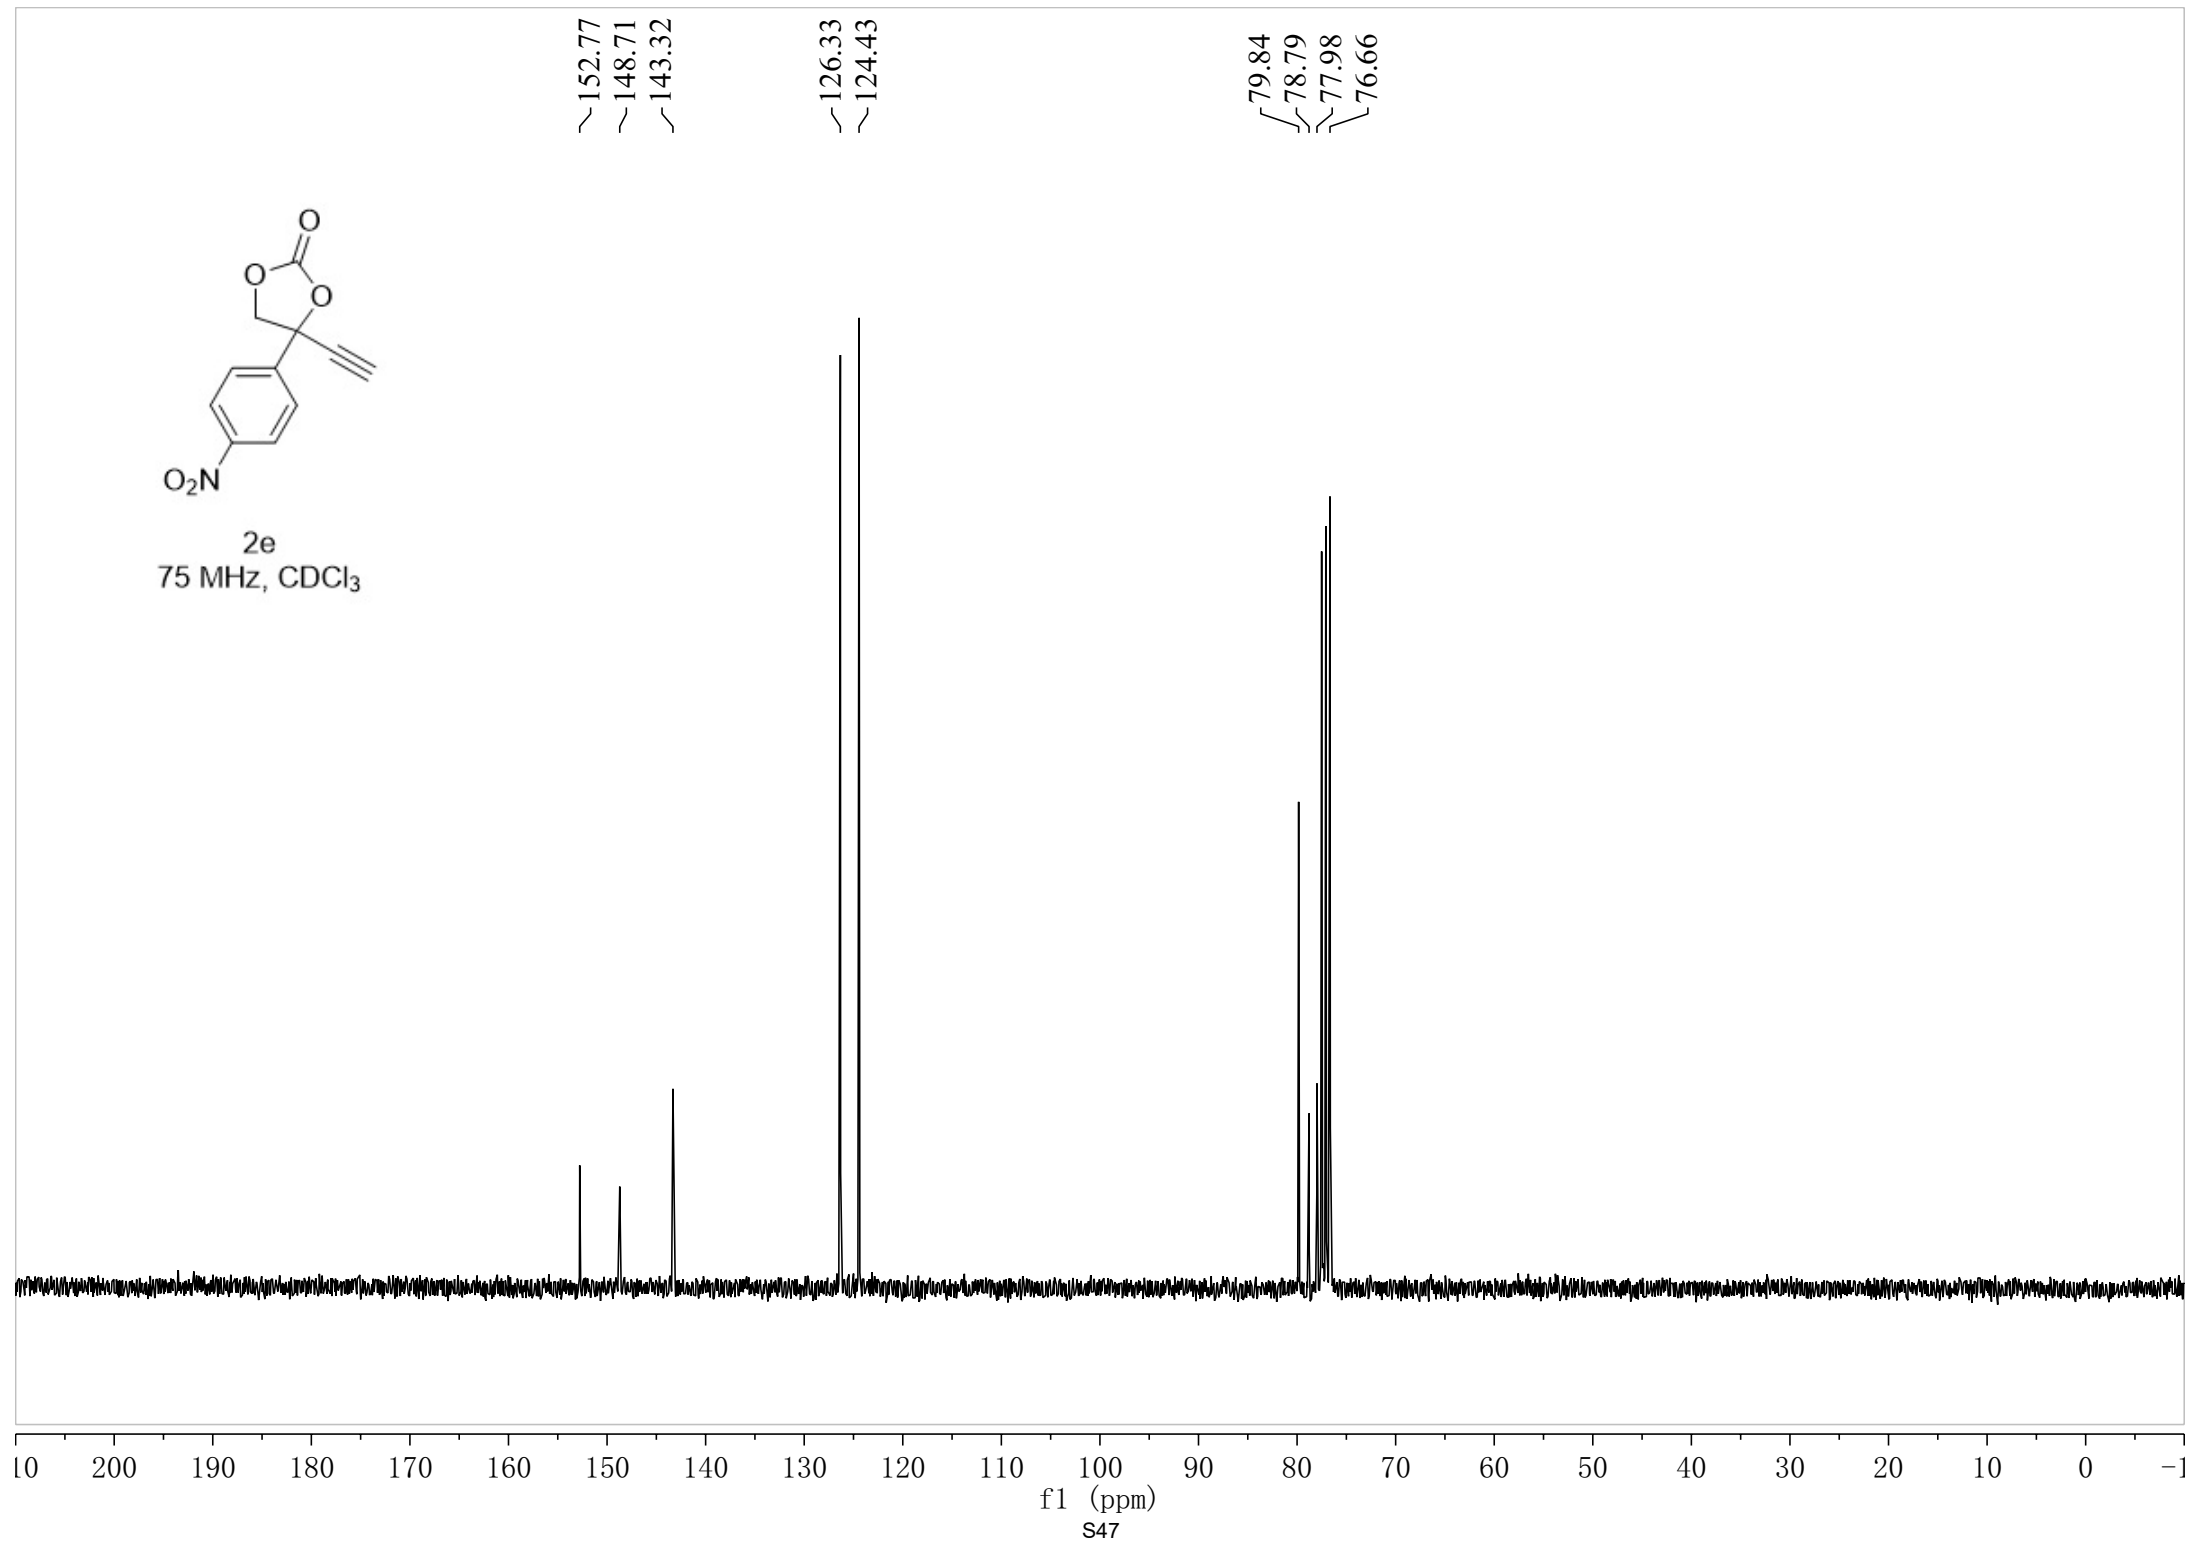

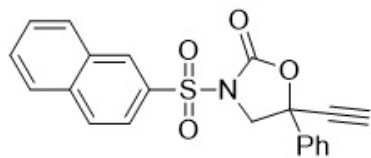

4d  
300 MHz, CDCl<sub>3</sub>

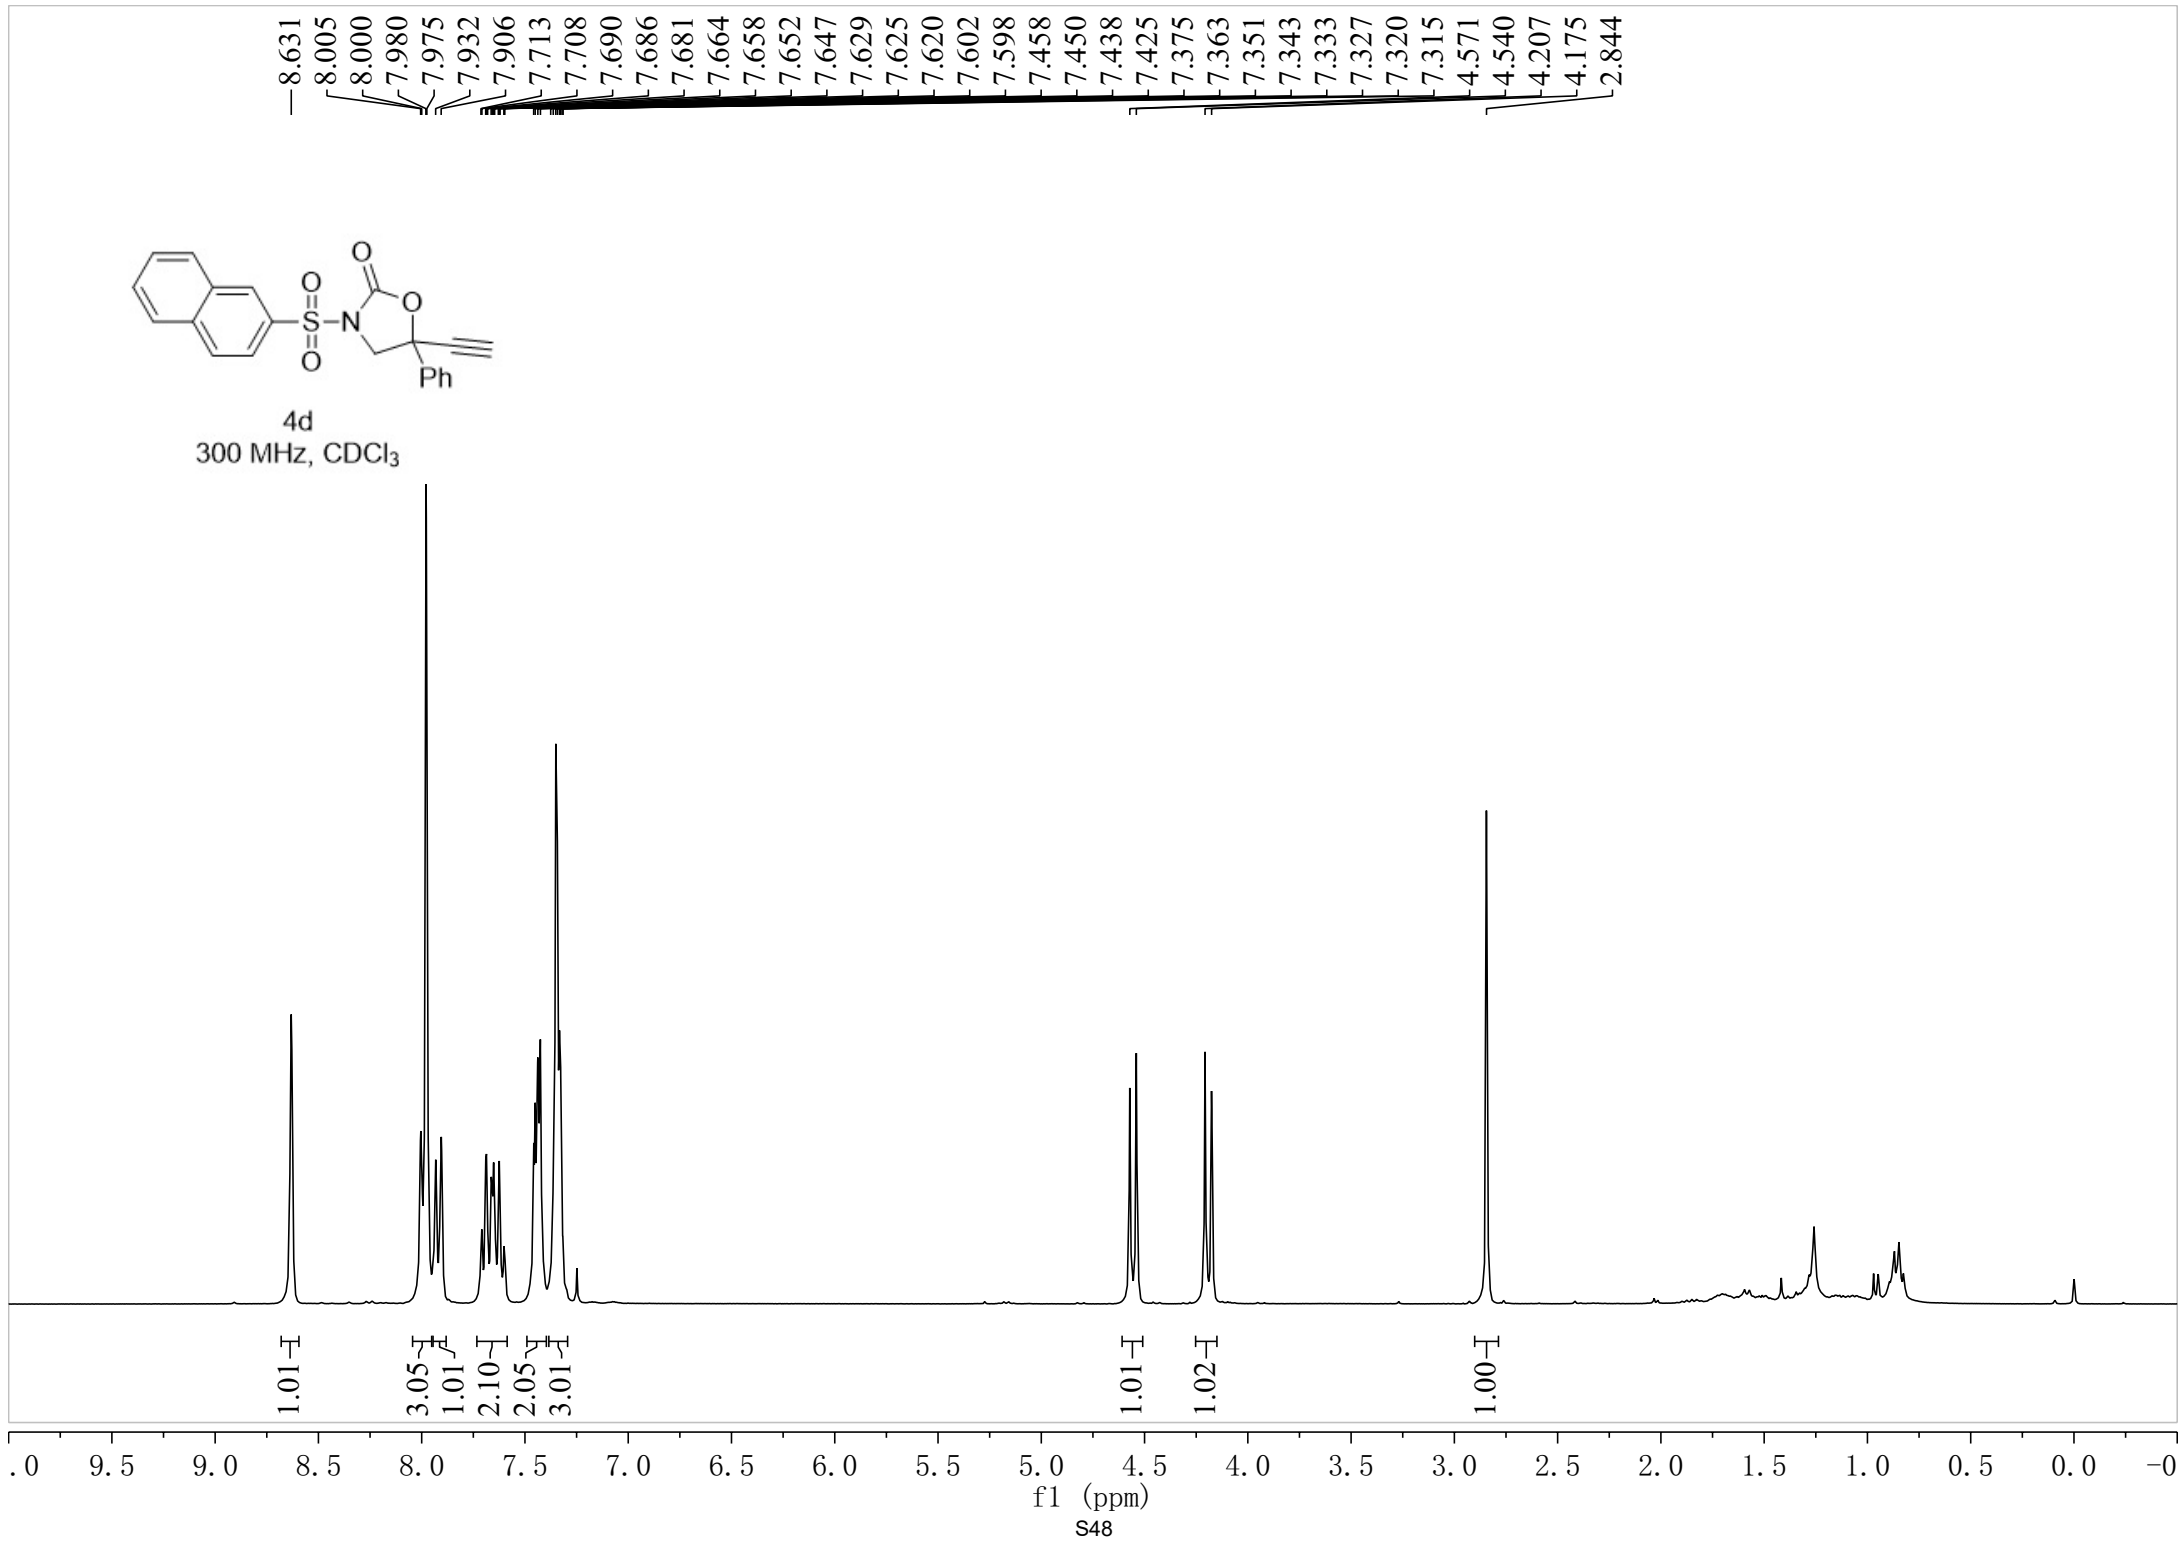

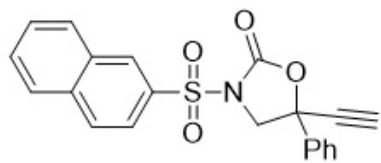

4d  
75 MHz, CDCl<sub>3</sub>

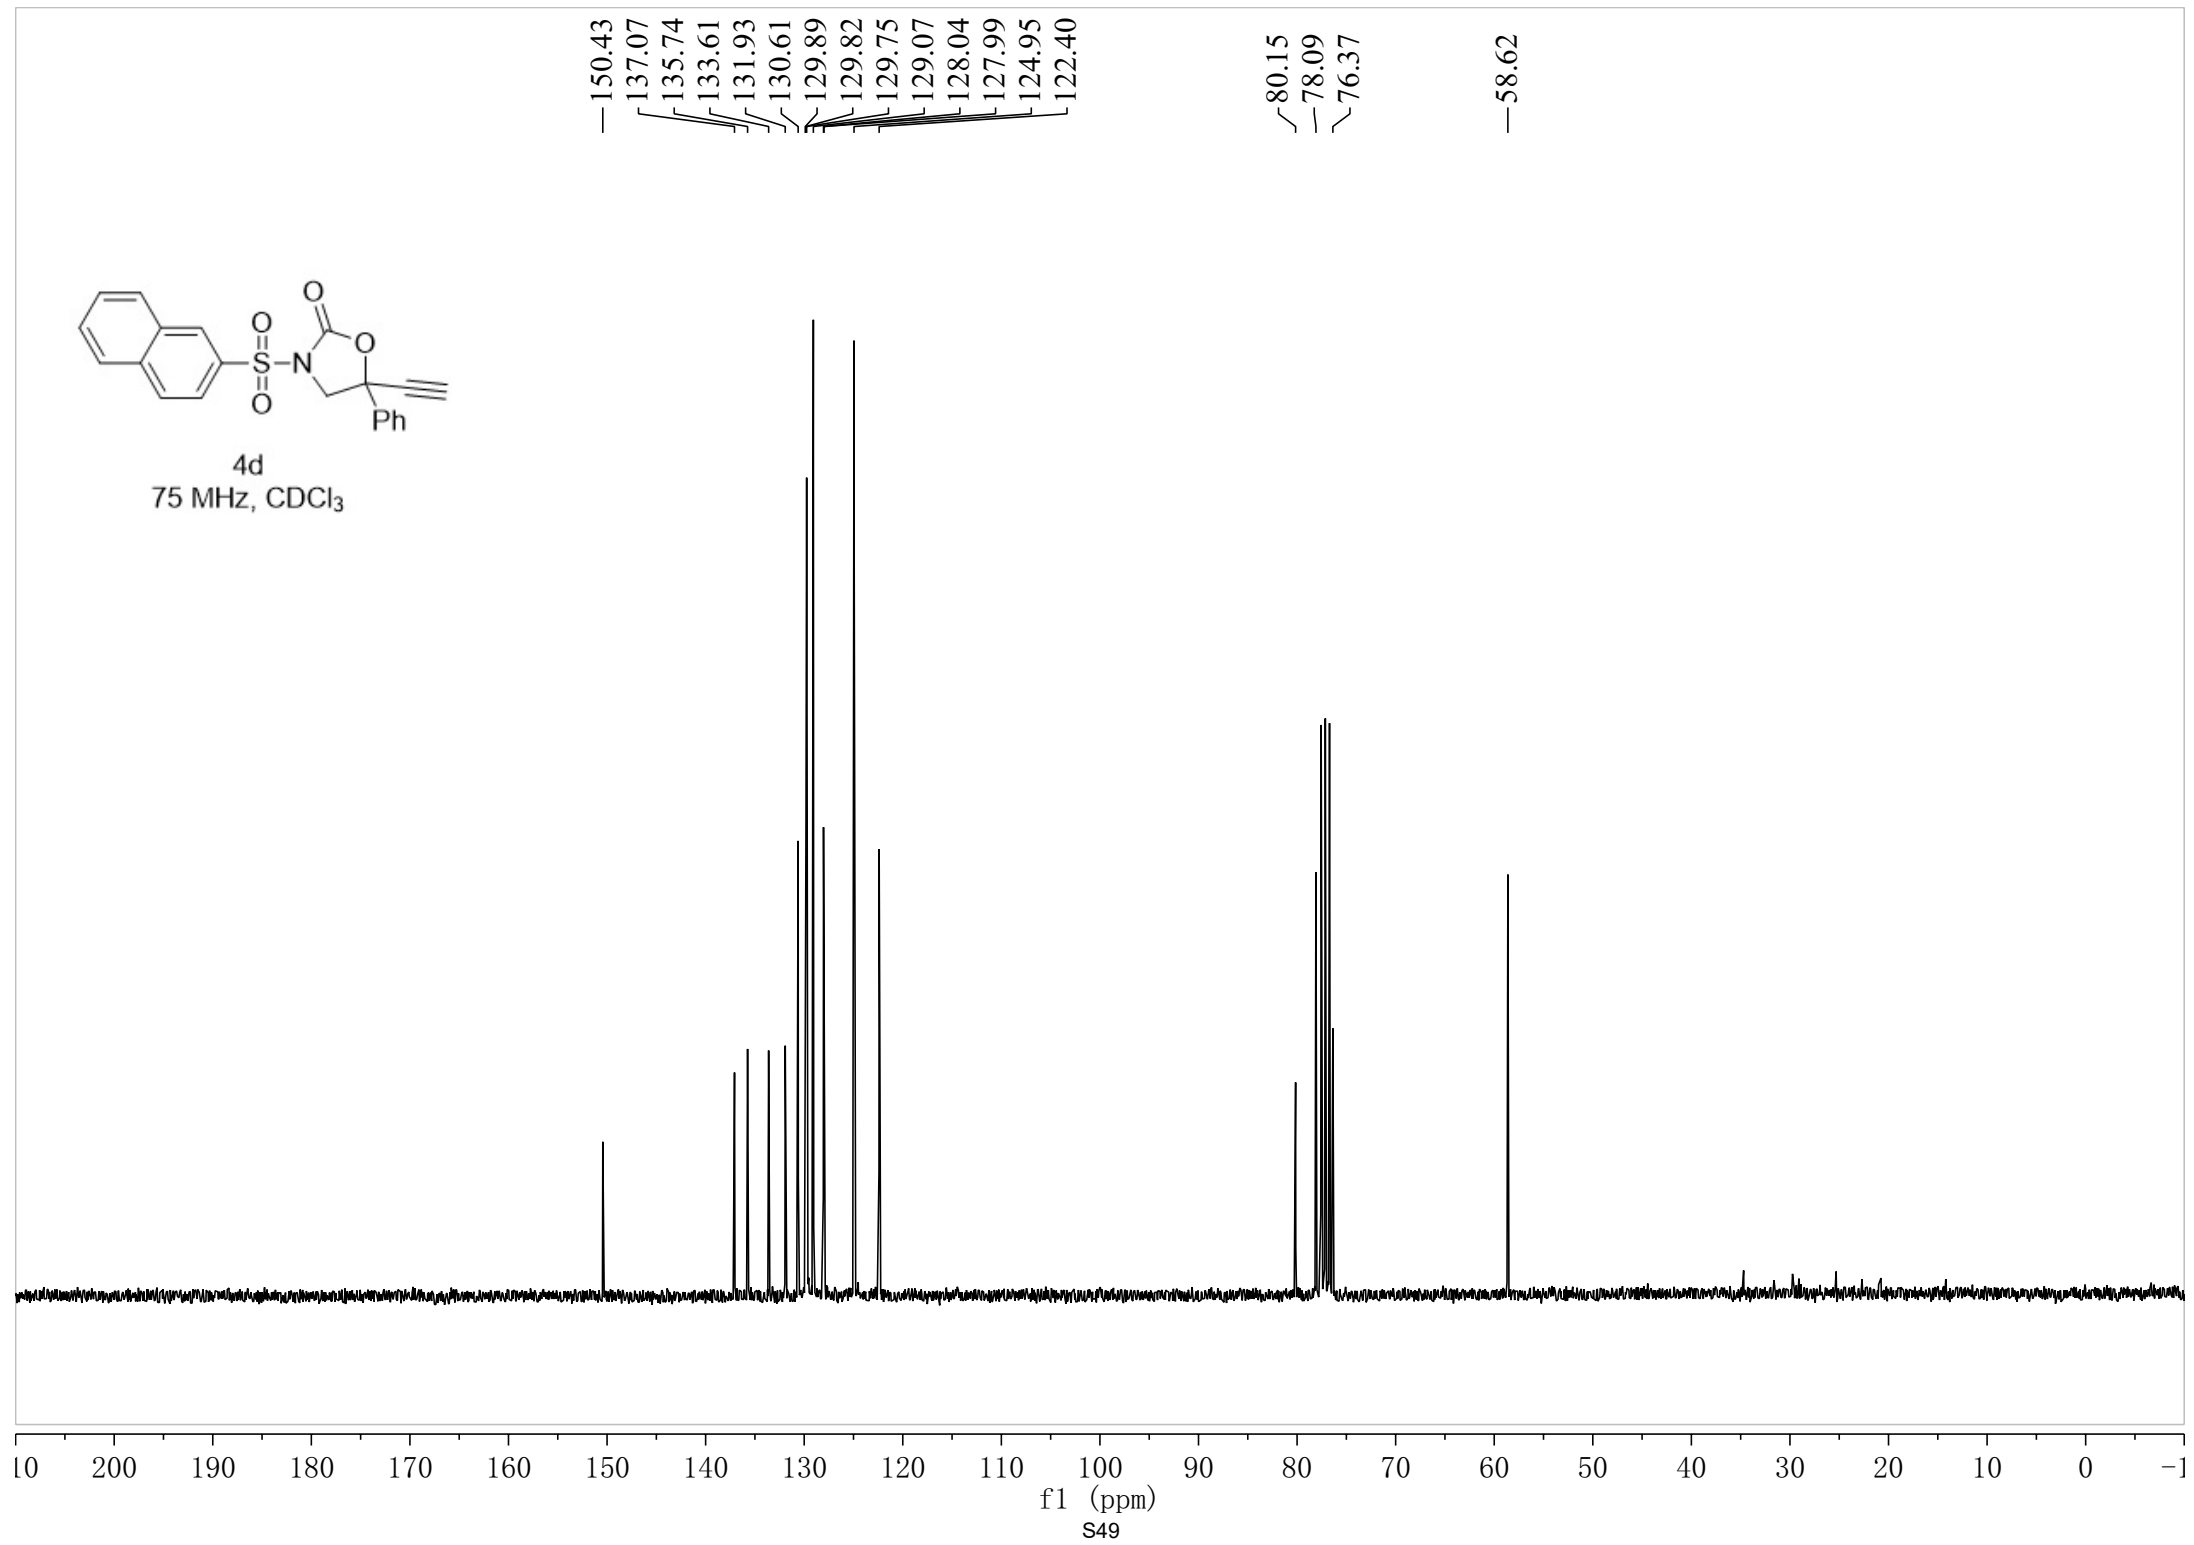

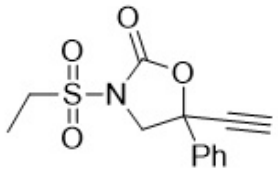

4e

400 MHz, CDCl<sub>3</sub>

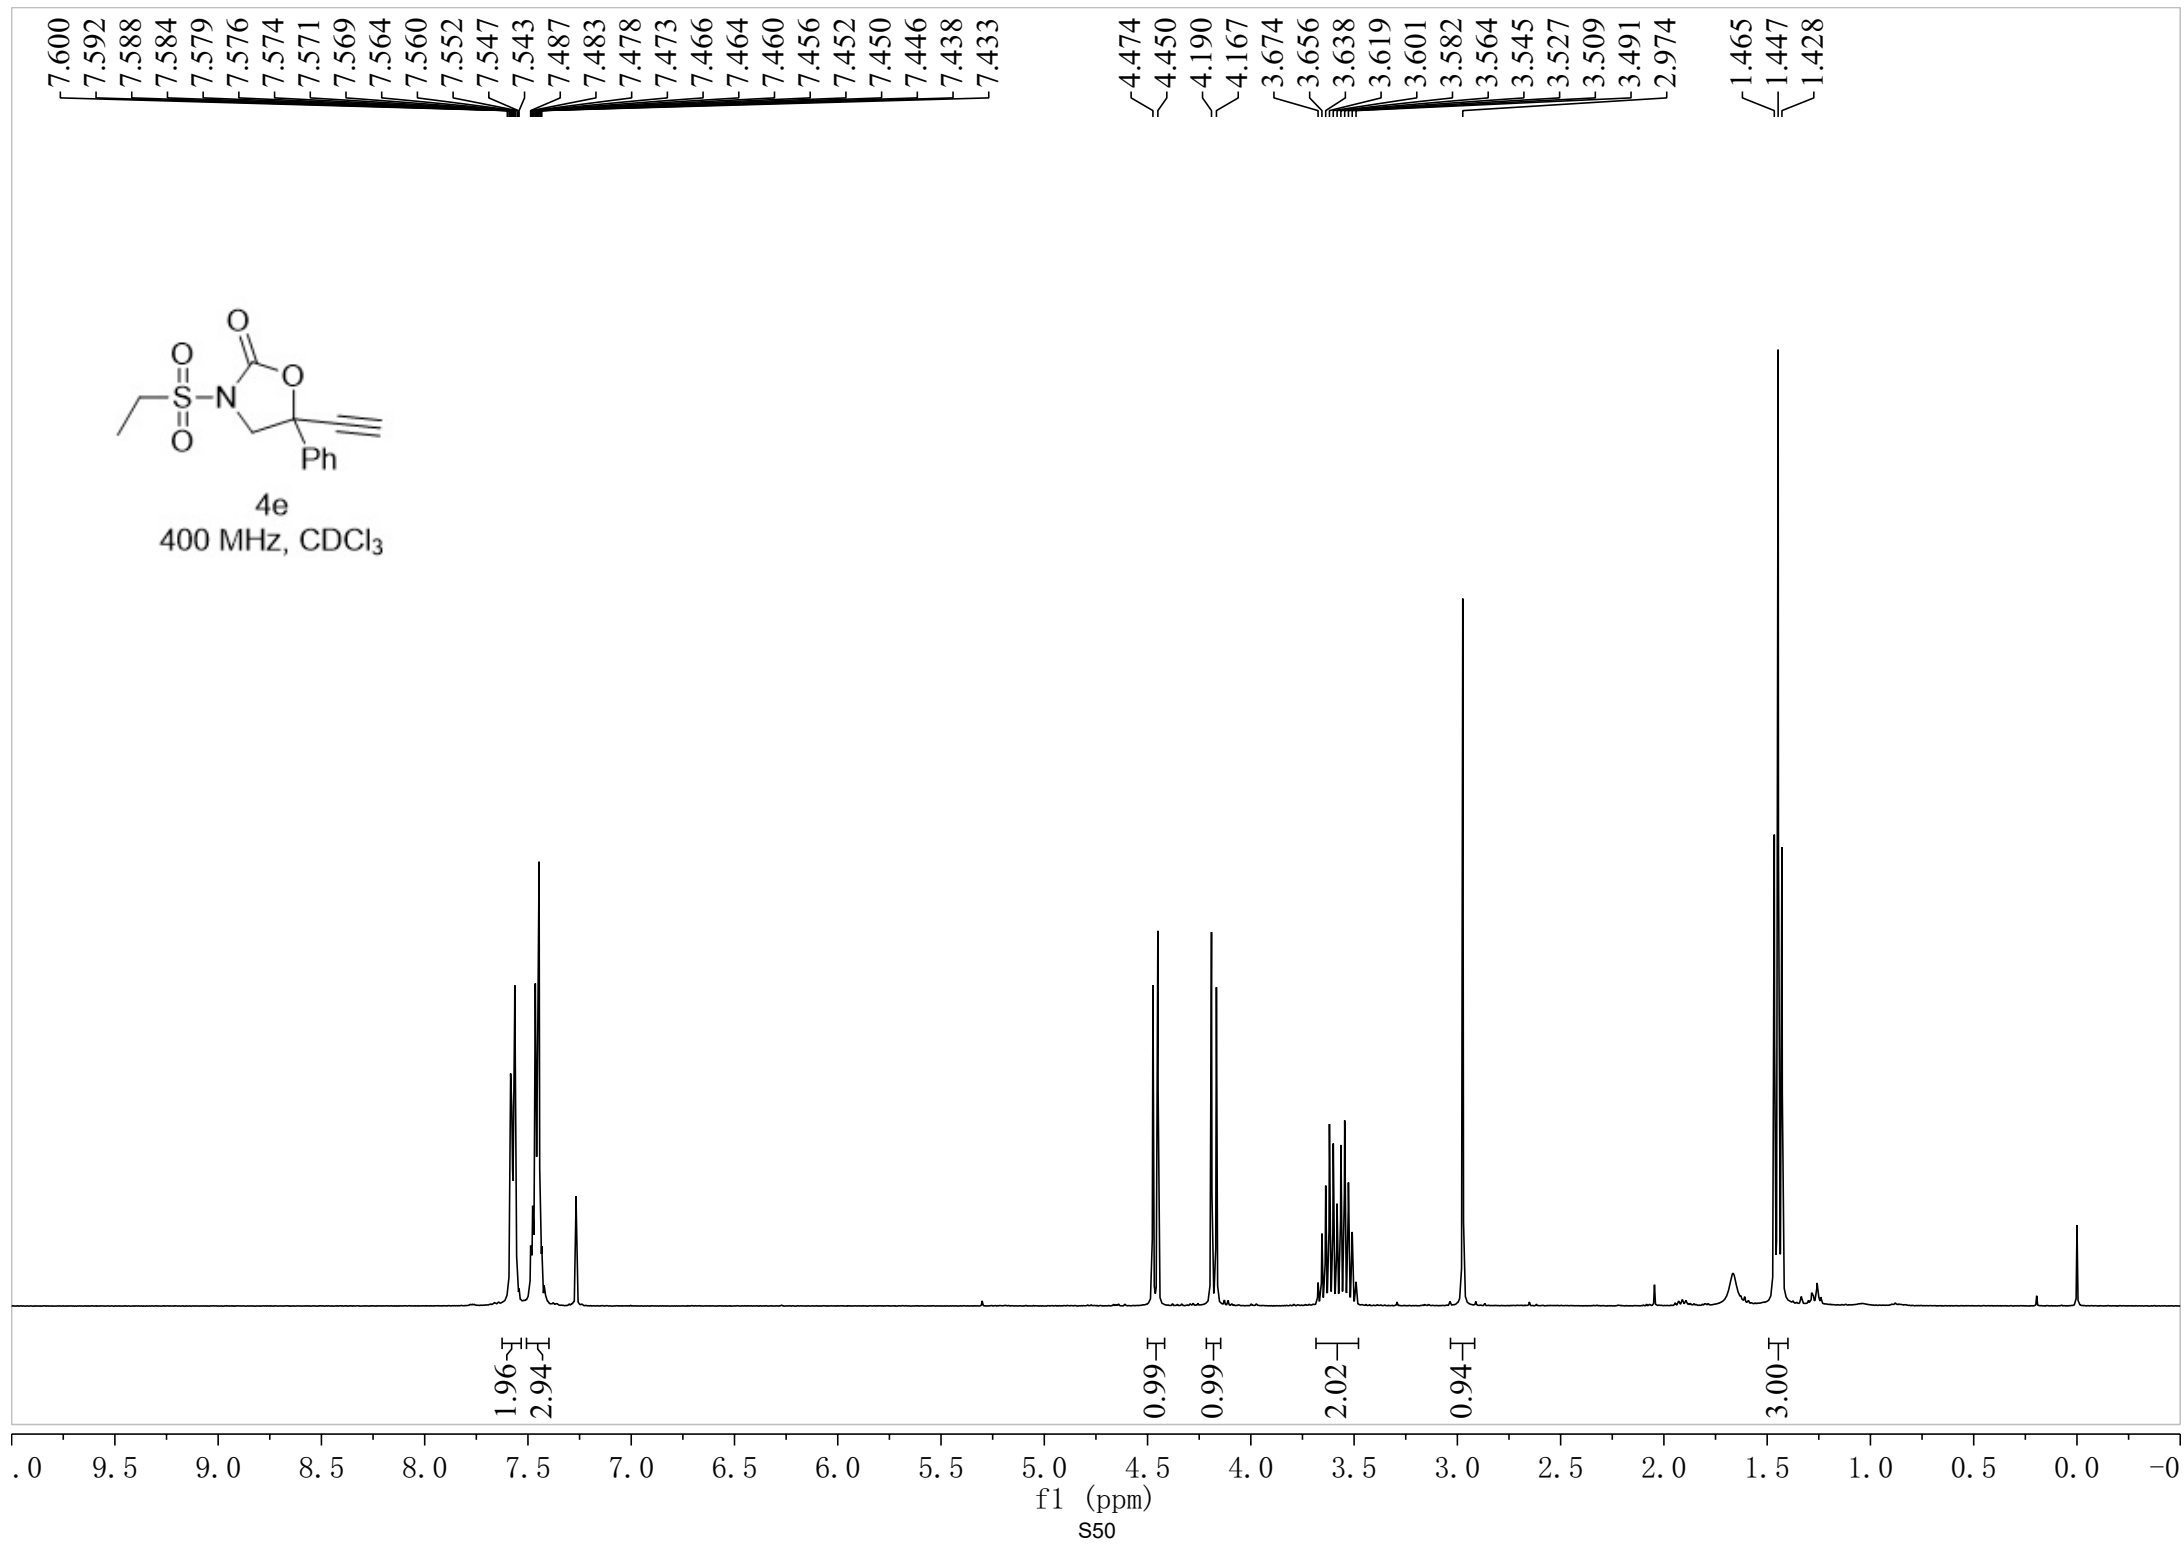

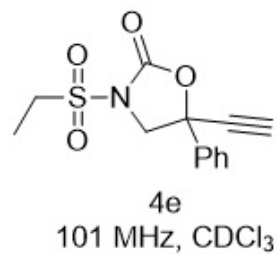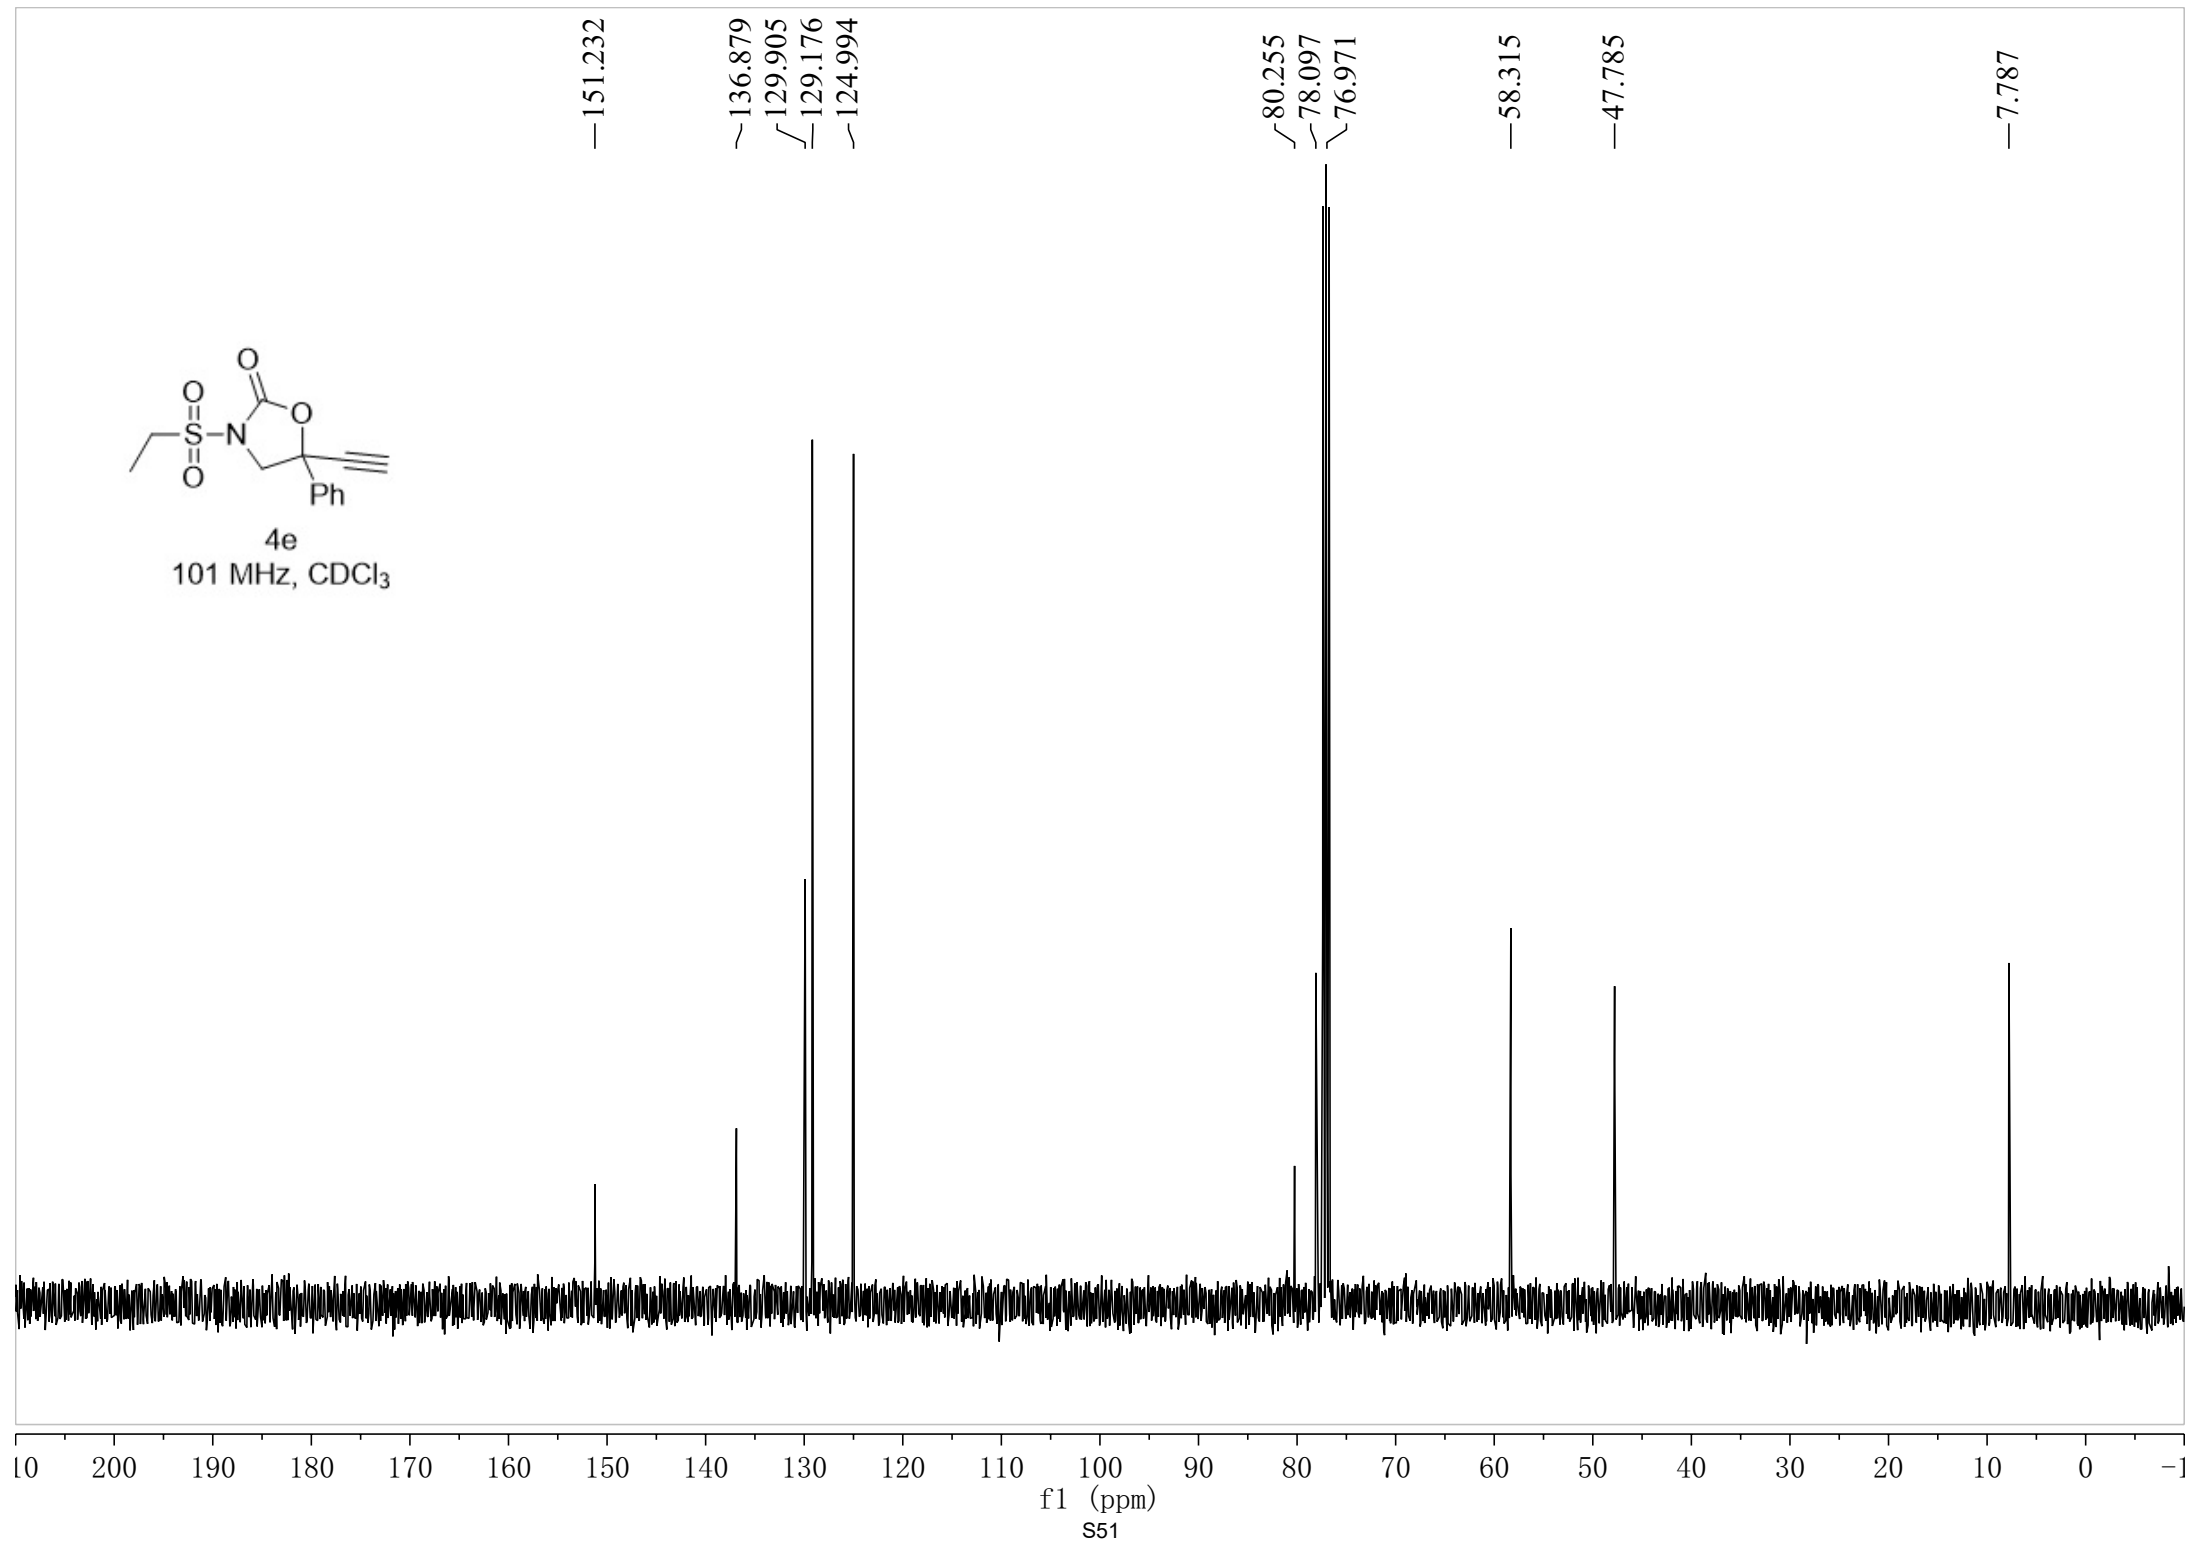

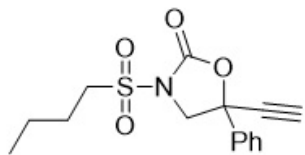

4f  
400 MHz, CDCl<sub>3</sub>

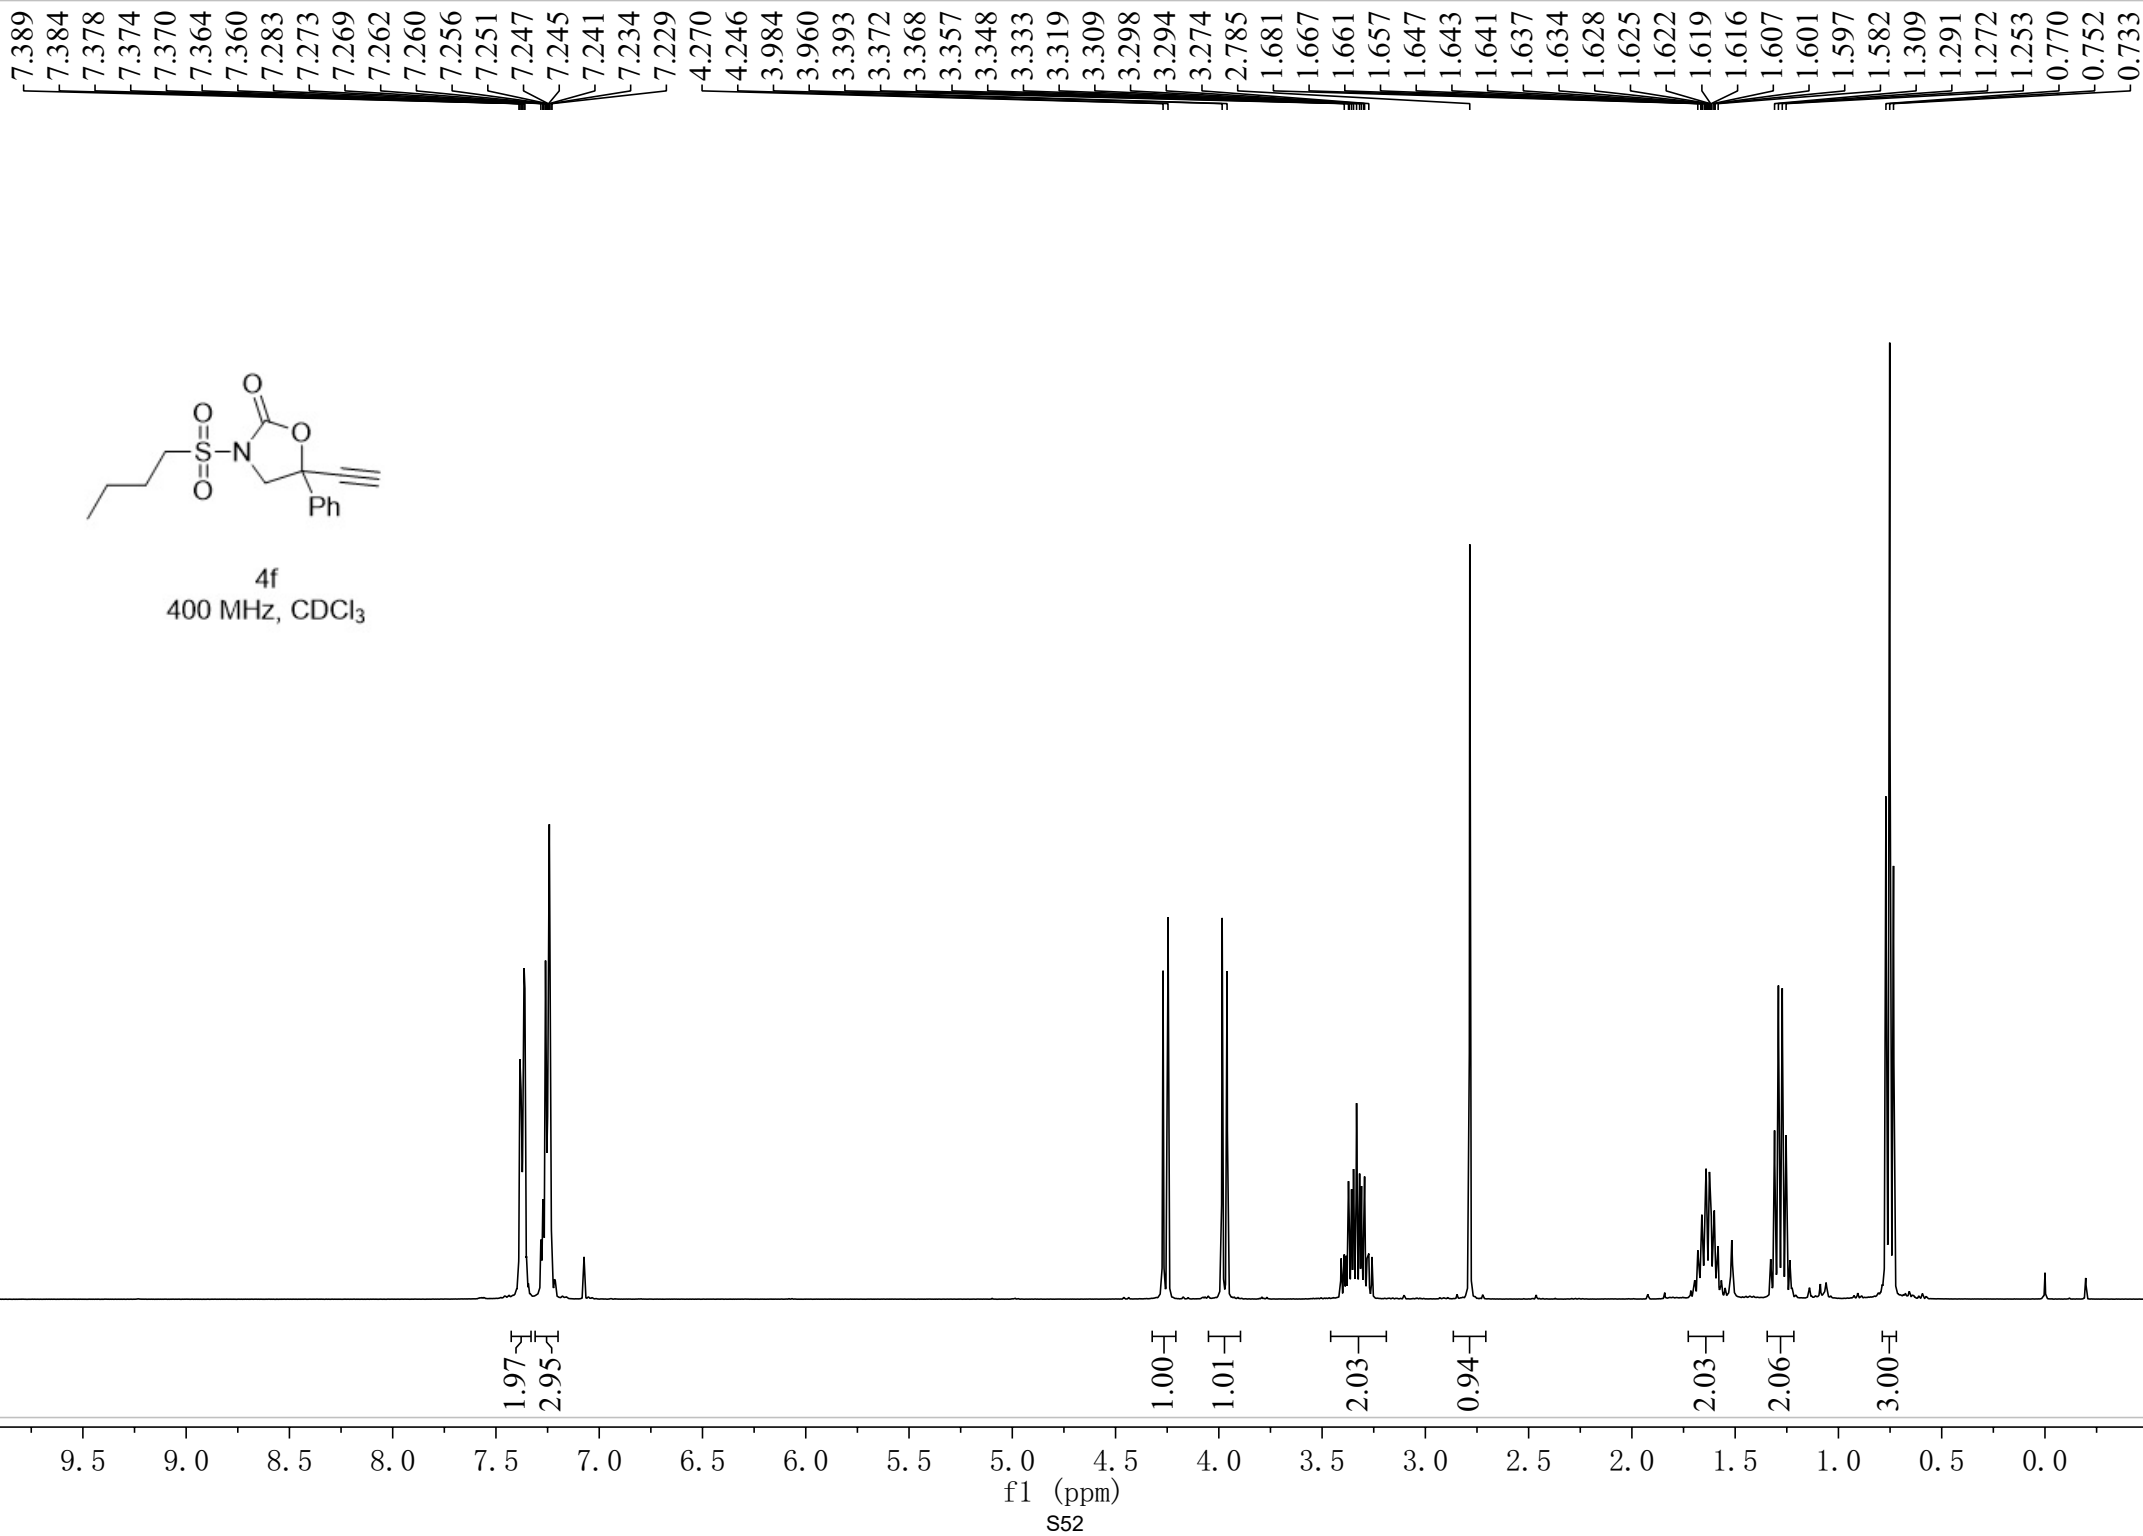

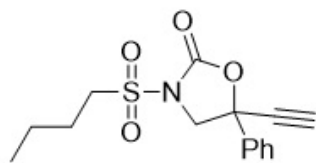

4f  
101 MHz, CDCl<sub>3</sub>

151.25  
136.96  
129.88  
129.16  
125.01  
80.26  
78.15  
76.91  
58.18  
52.85  
24.90  
21.29  
13.52

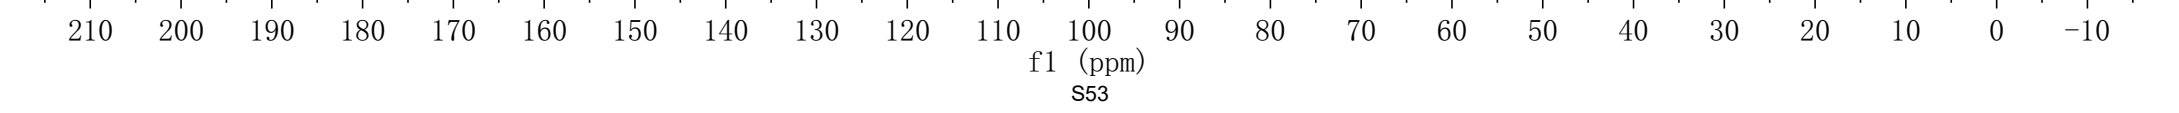

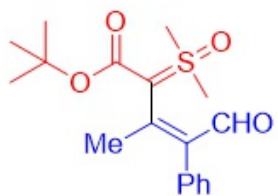

Z/E = 5:1  
 3aa  
 400 MHz, CDCl<sub>3</sub>

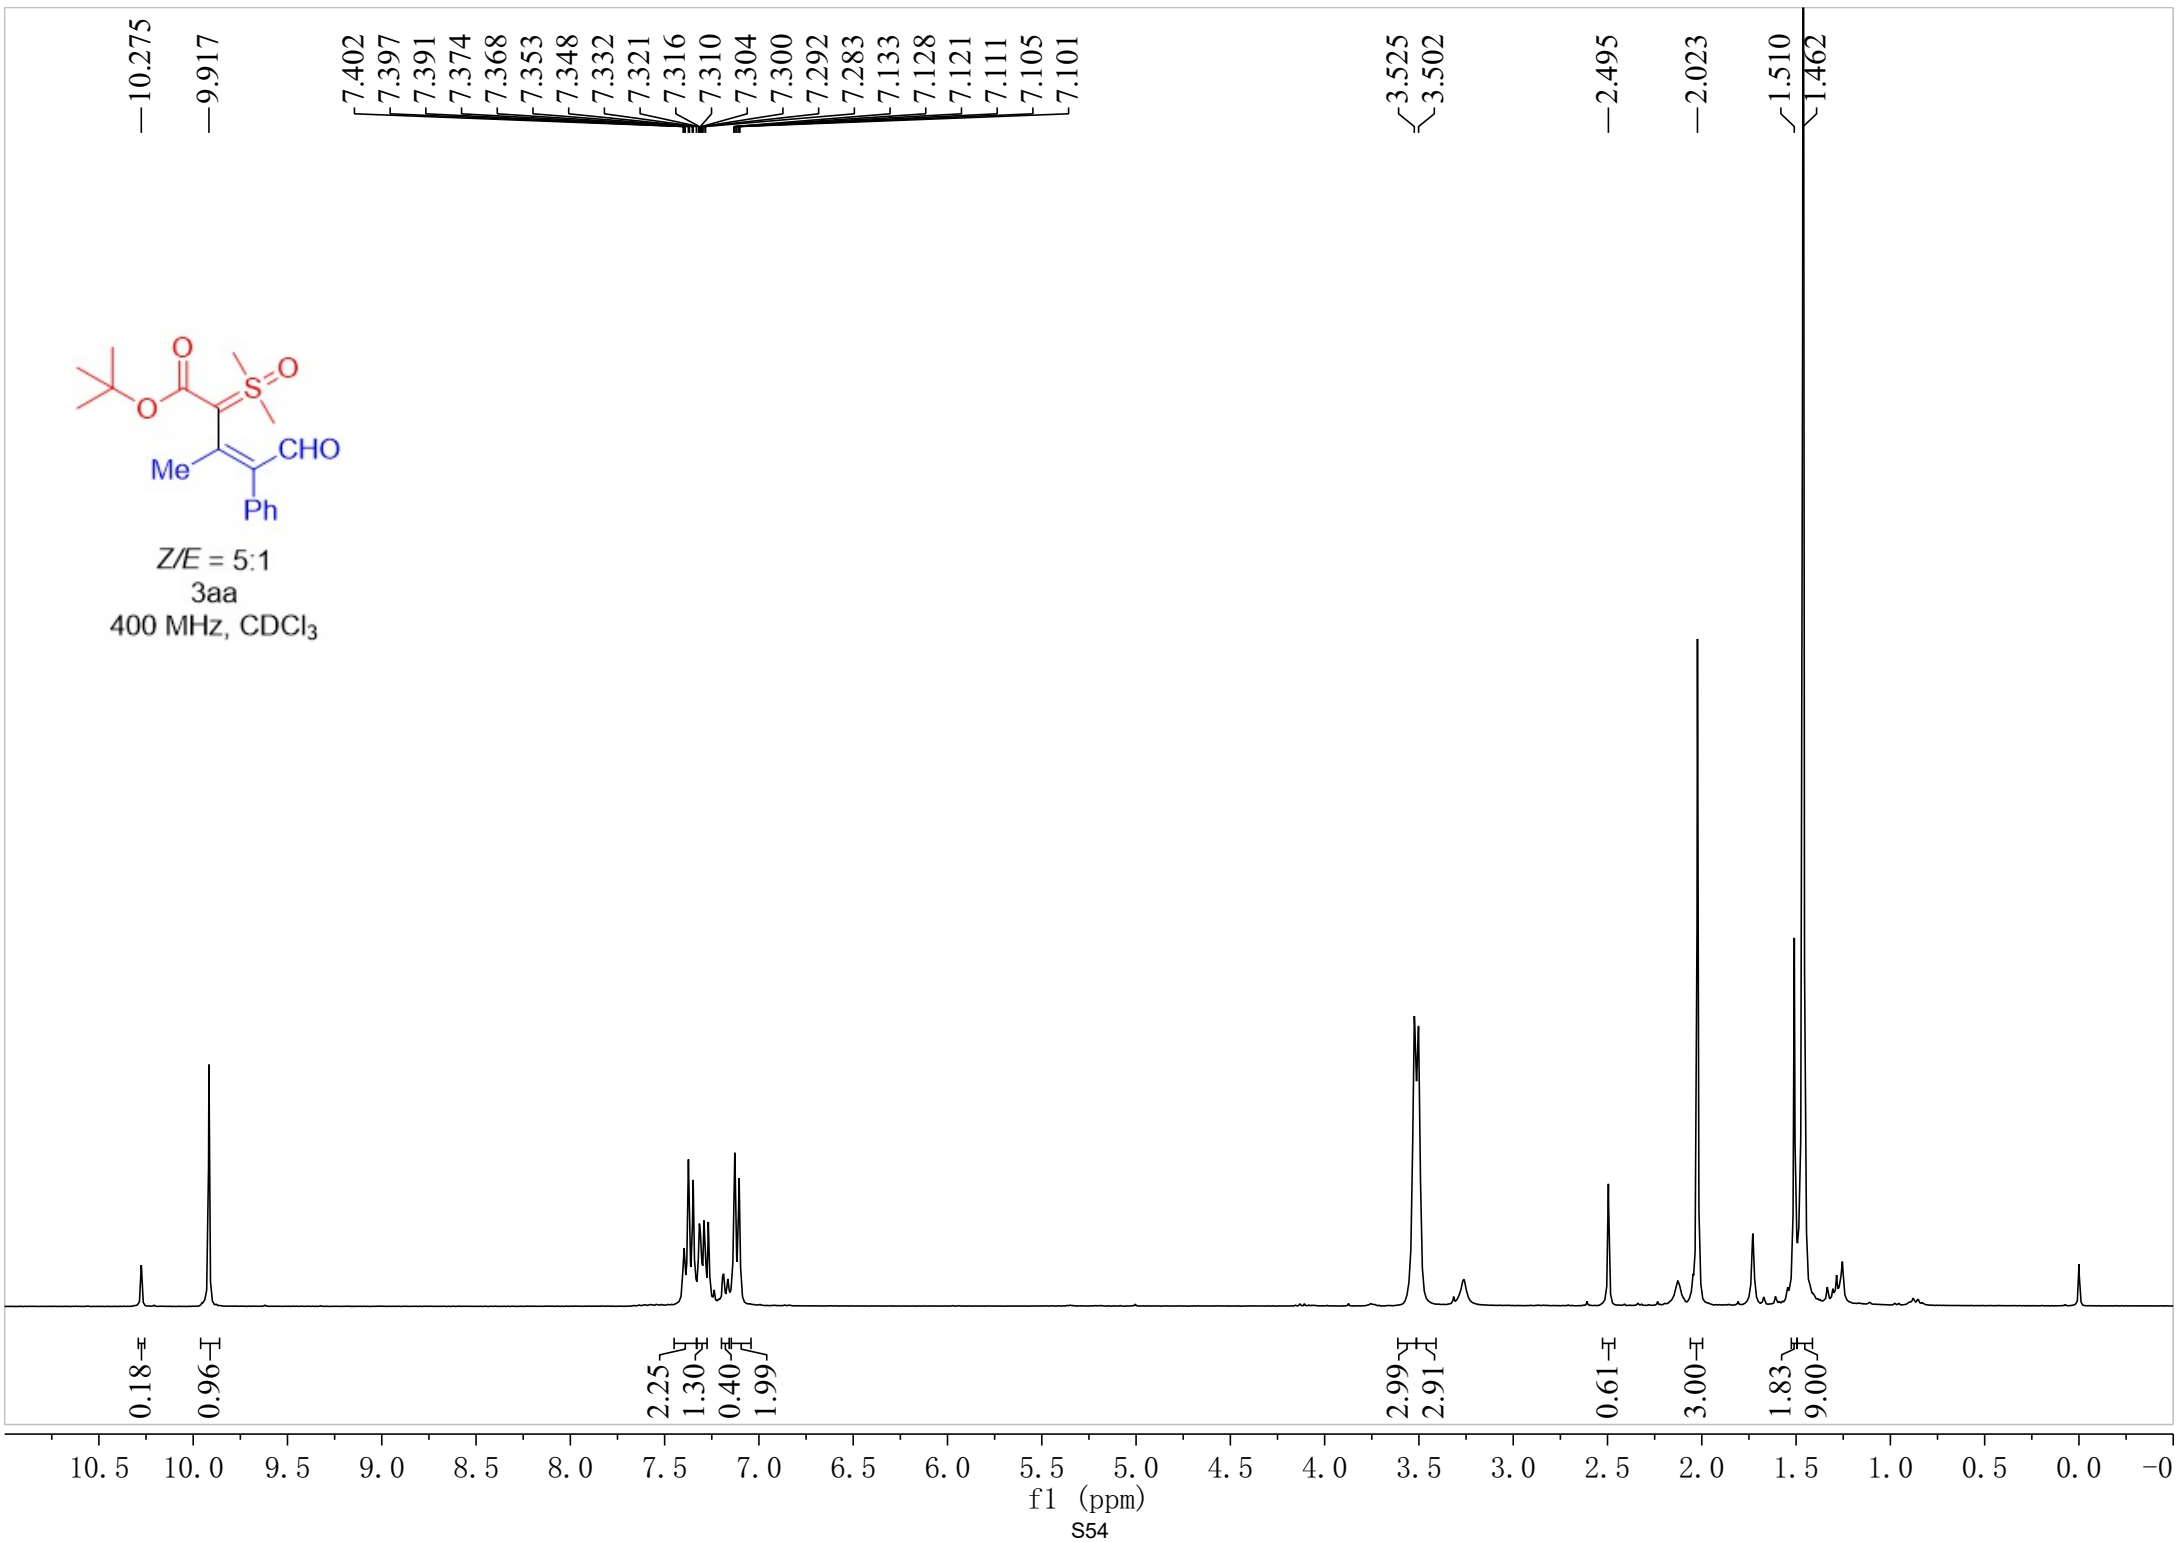

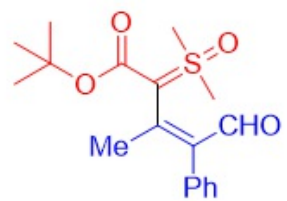

3aa  
101 MHz, CDCl<sub>3</sub>

—191.54

—165.51

~149.44

~143.07

~136.44

~129.89

~128.16

~127.25

—79.80

—68.17

~44.00

~43.71

—28.74

—24.65

210 200 190 180 170 160 150 140 130 120 110 100 90 80 70 60 50 40 30 20 10 0 -10

f1 (ppm)

S55

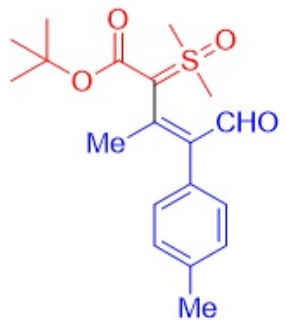

Z/E = 6:1

3ab

400 MHz, CDCl<sub>3</sub>

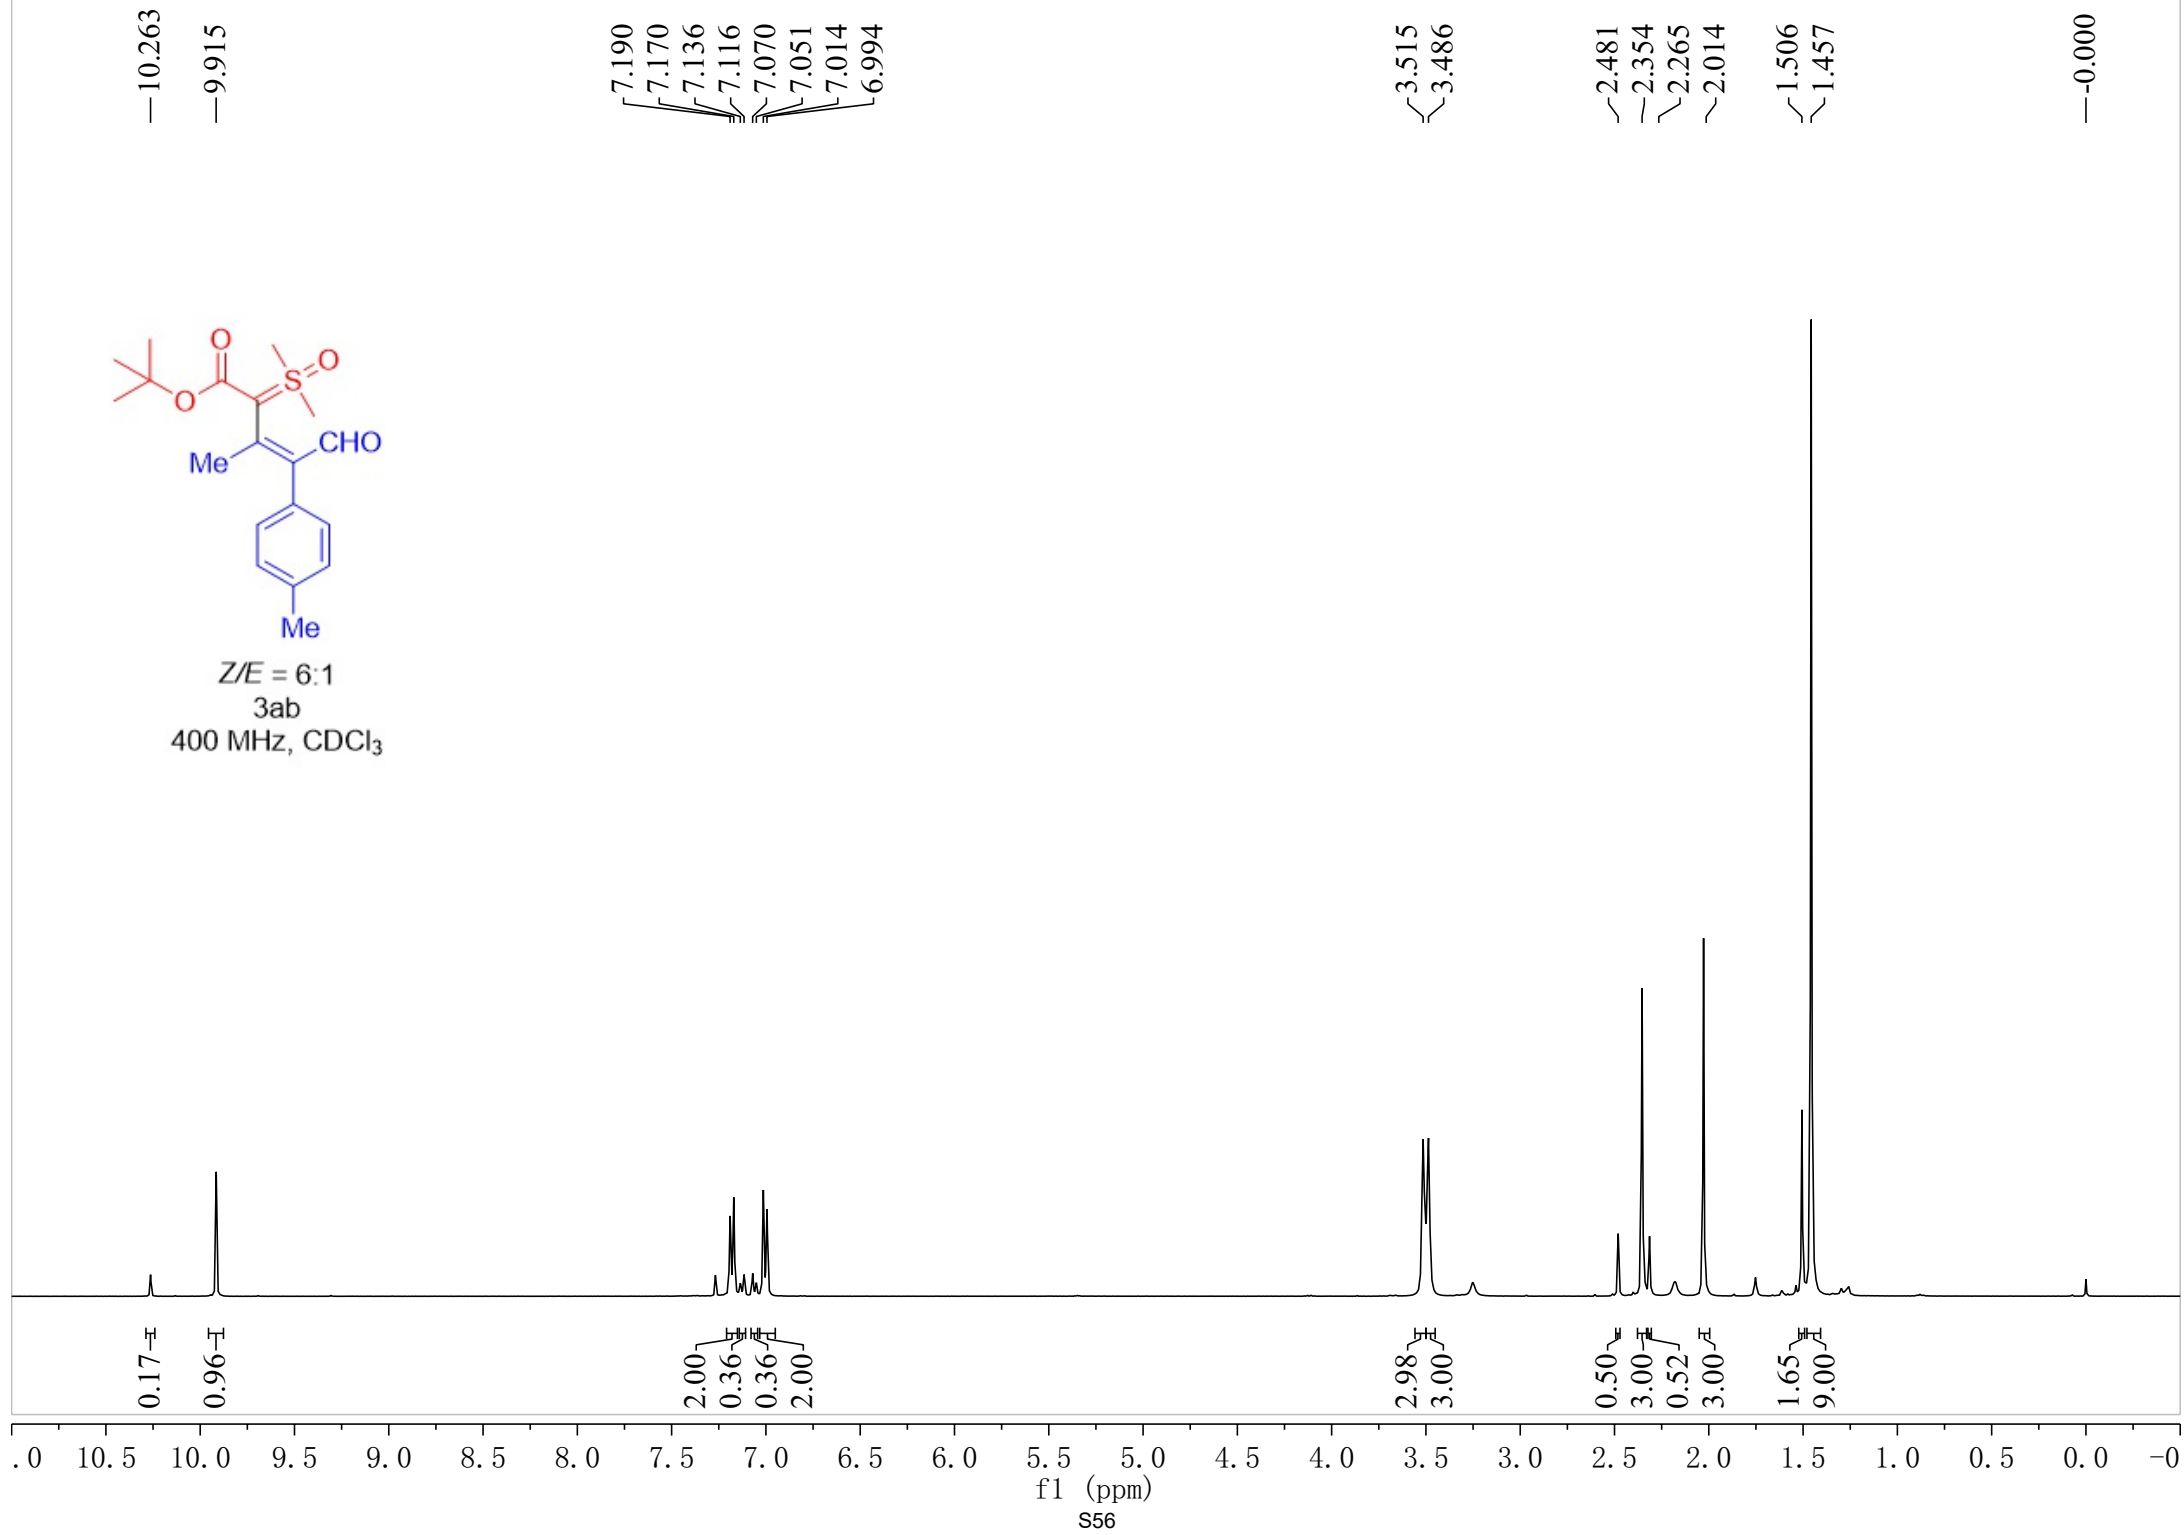

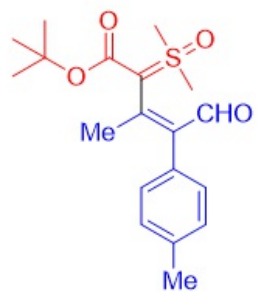

3ab  
101 MHz, CDCl<sub>3</sub>

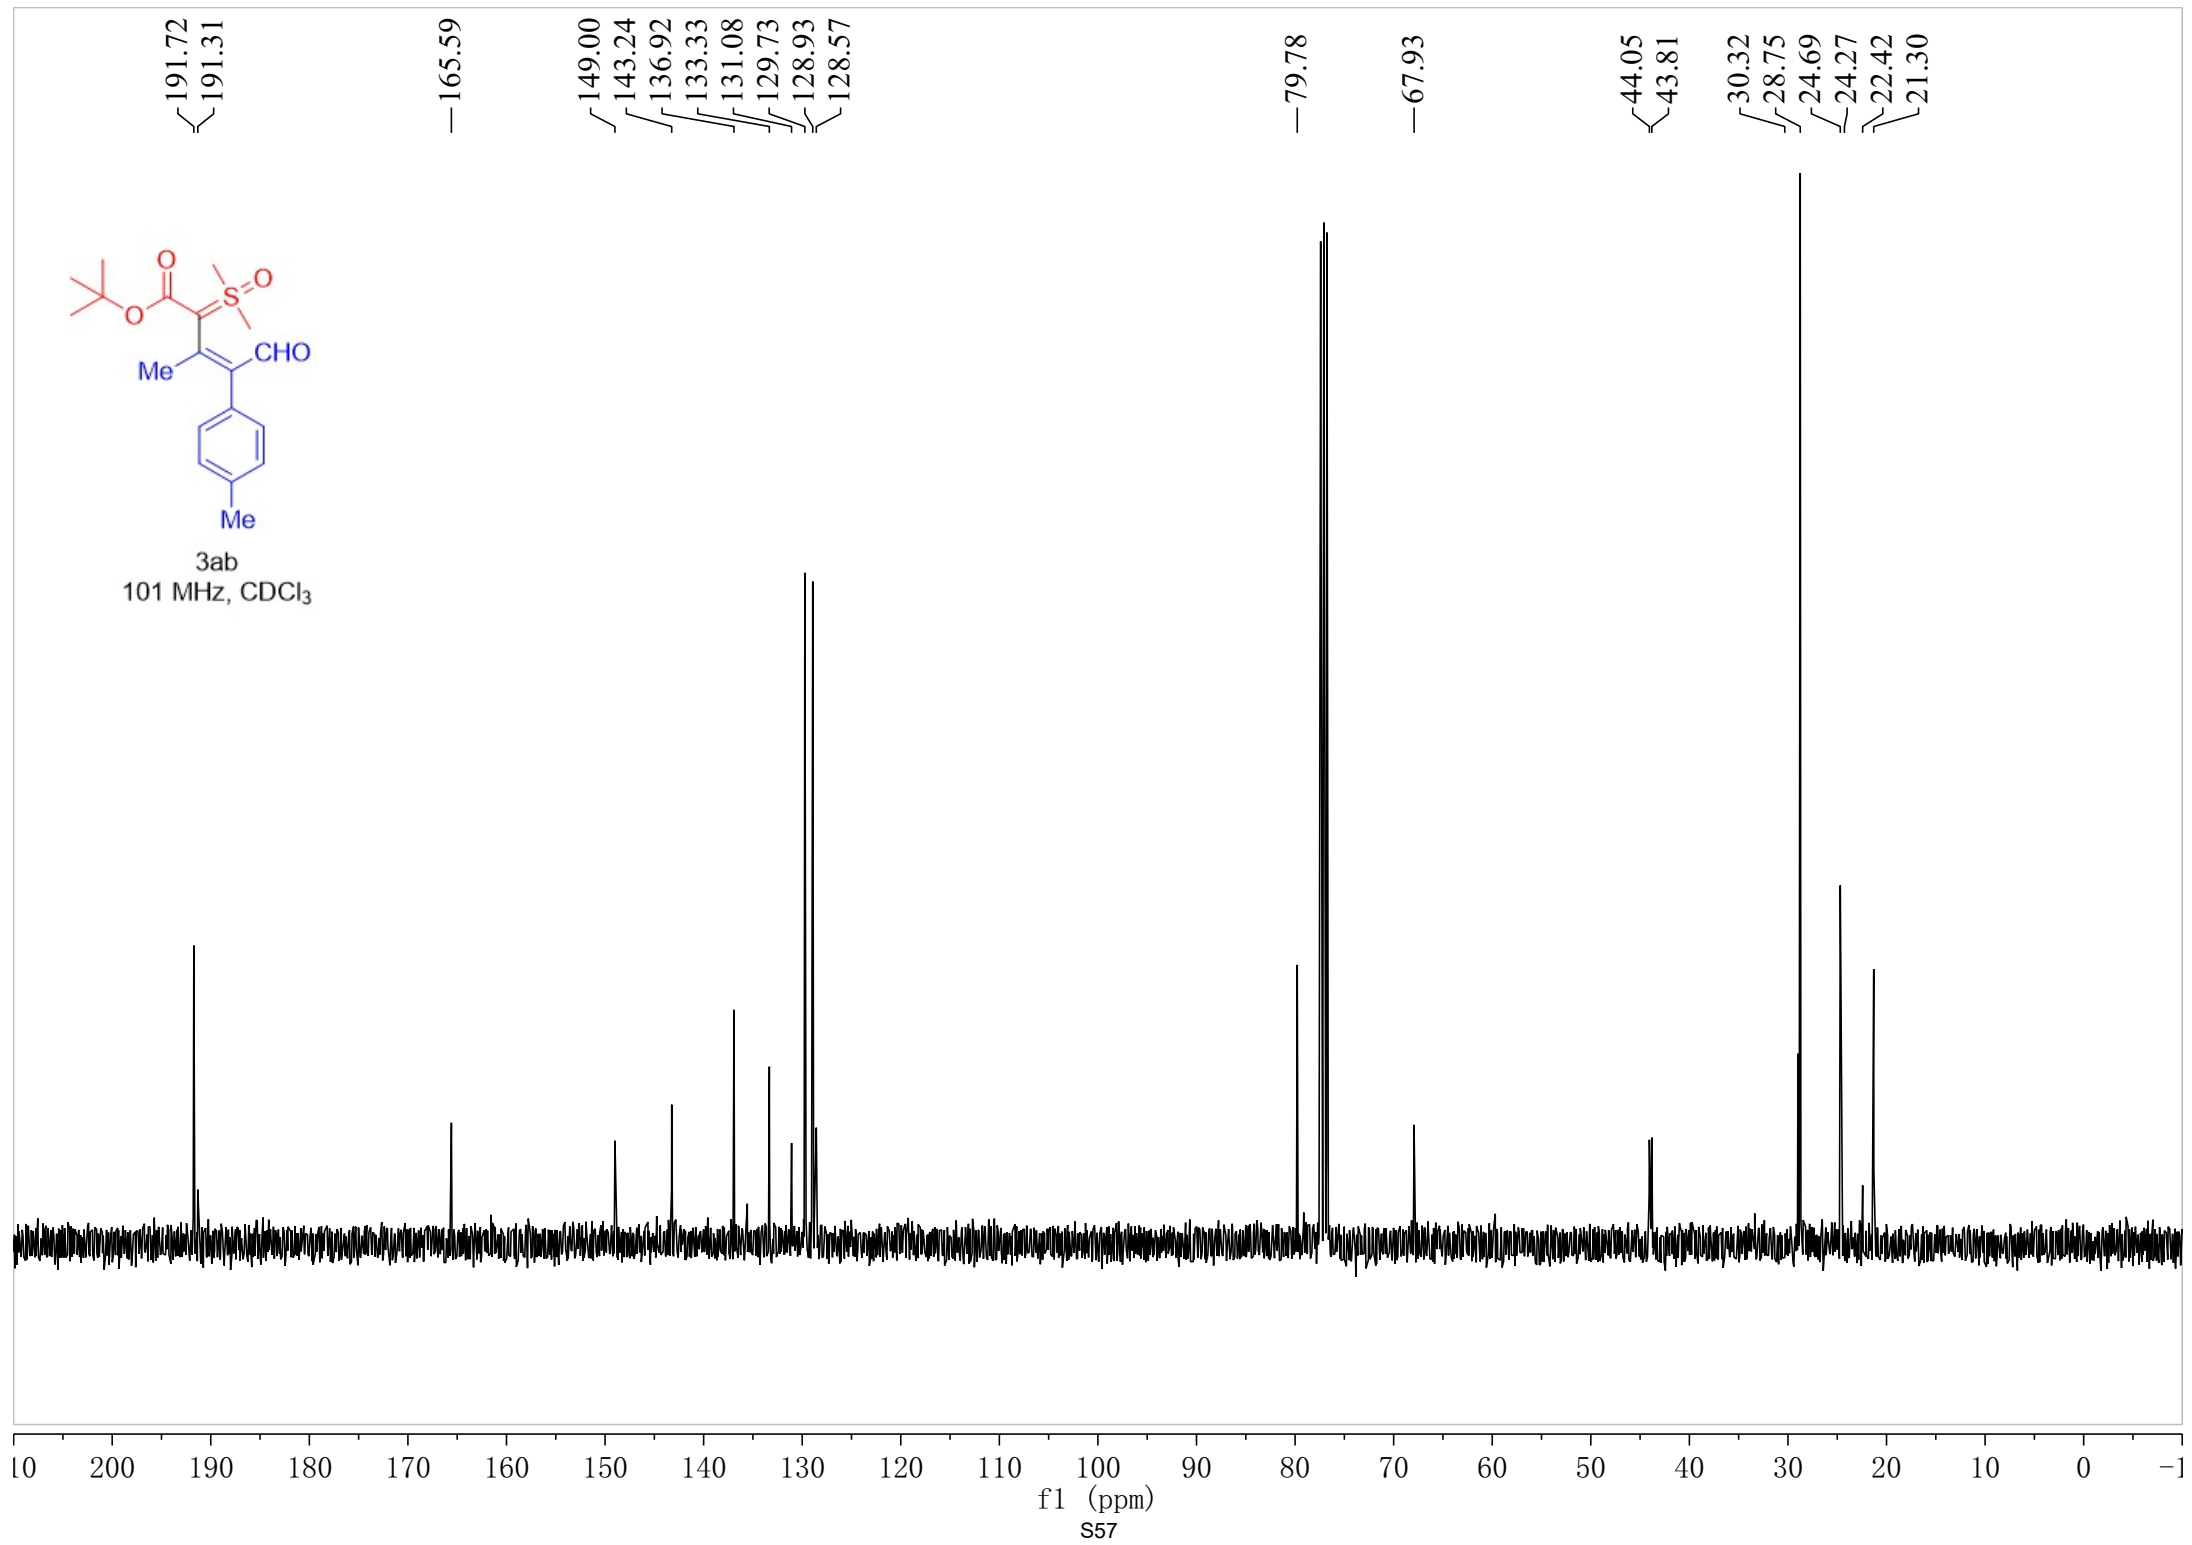

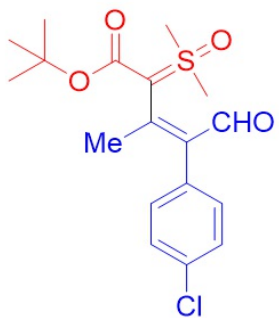

Z/E = 7:1  
3ac  
400MHz, CDCl<sub>3</sub>

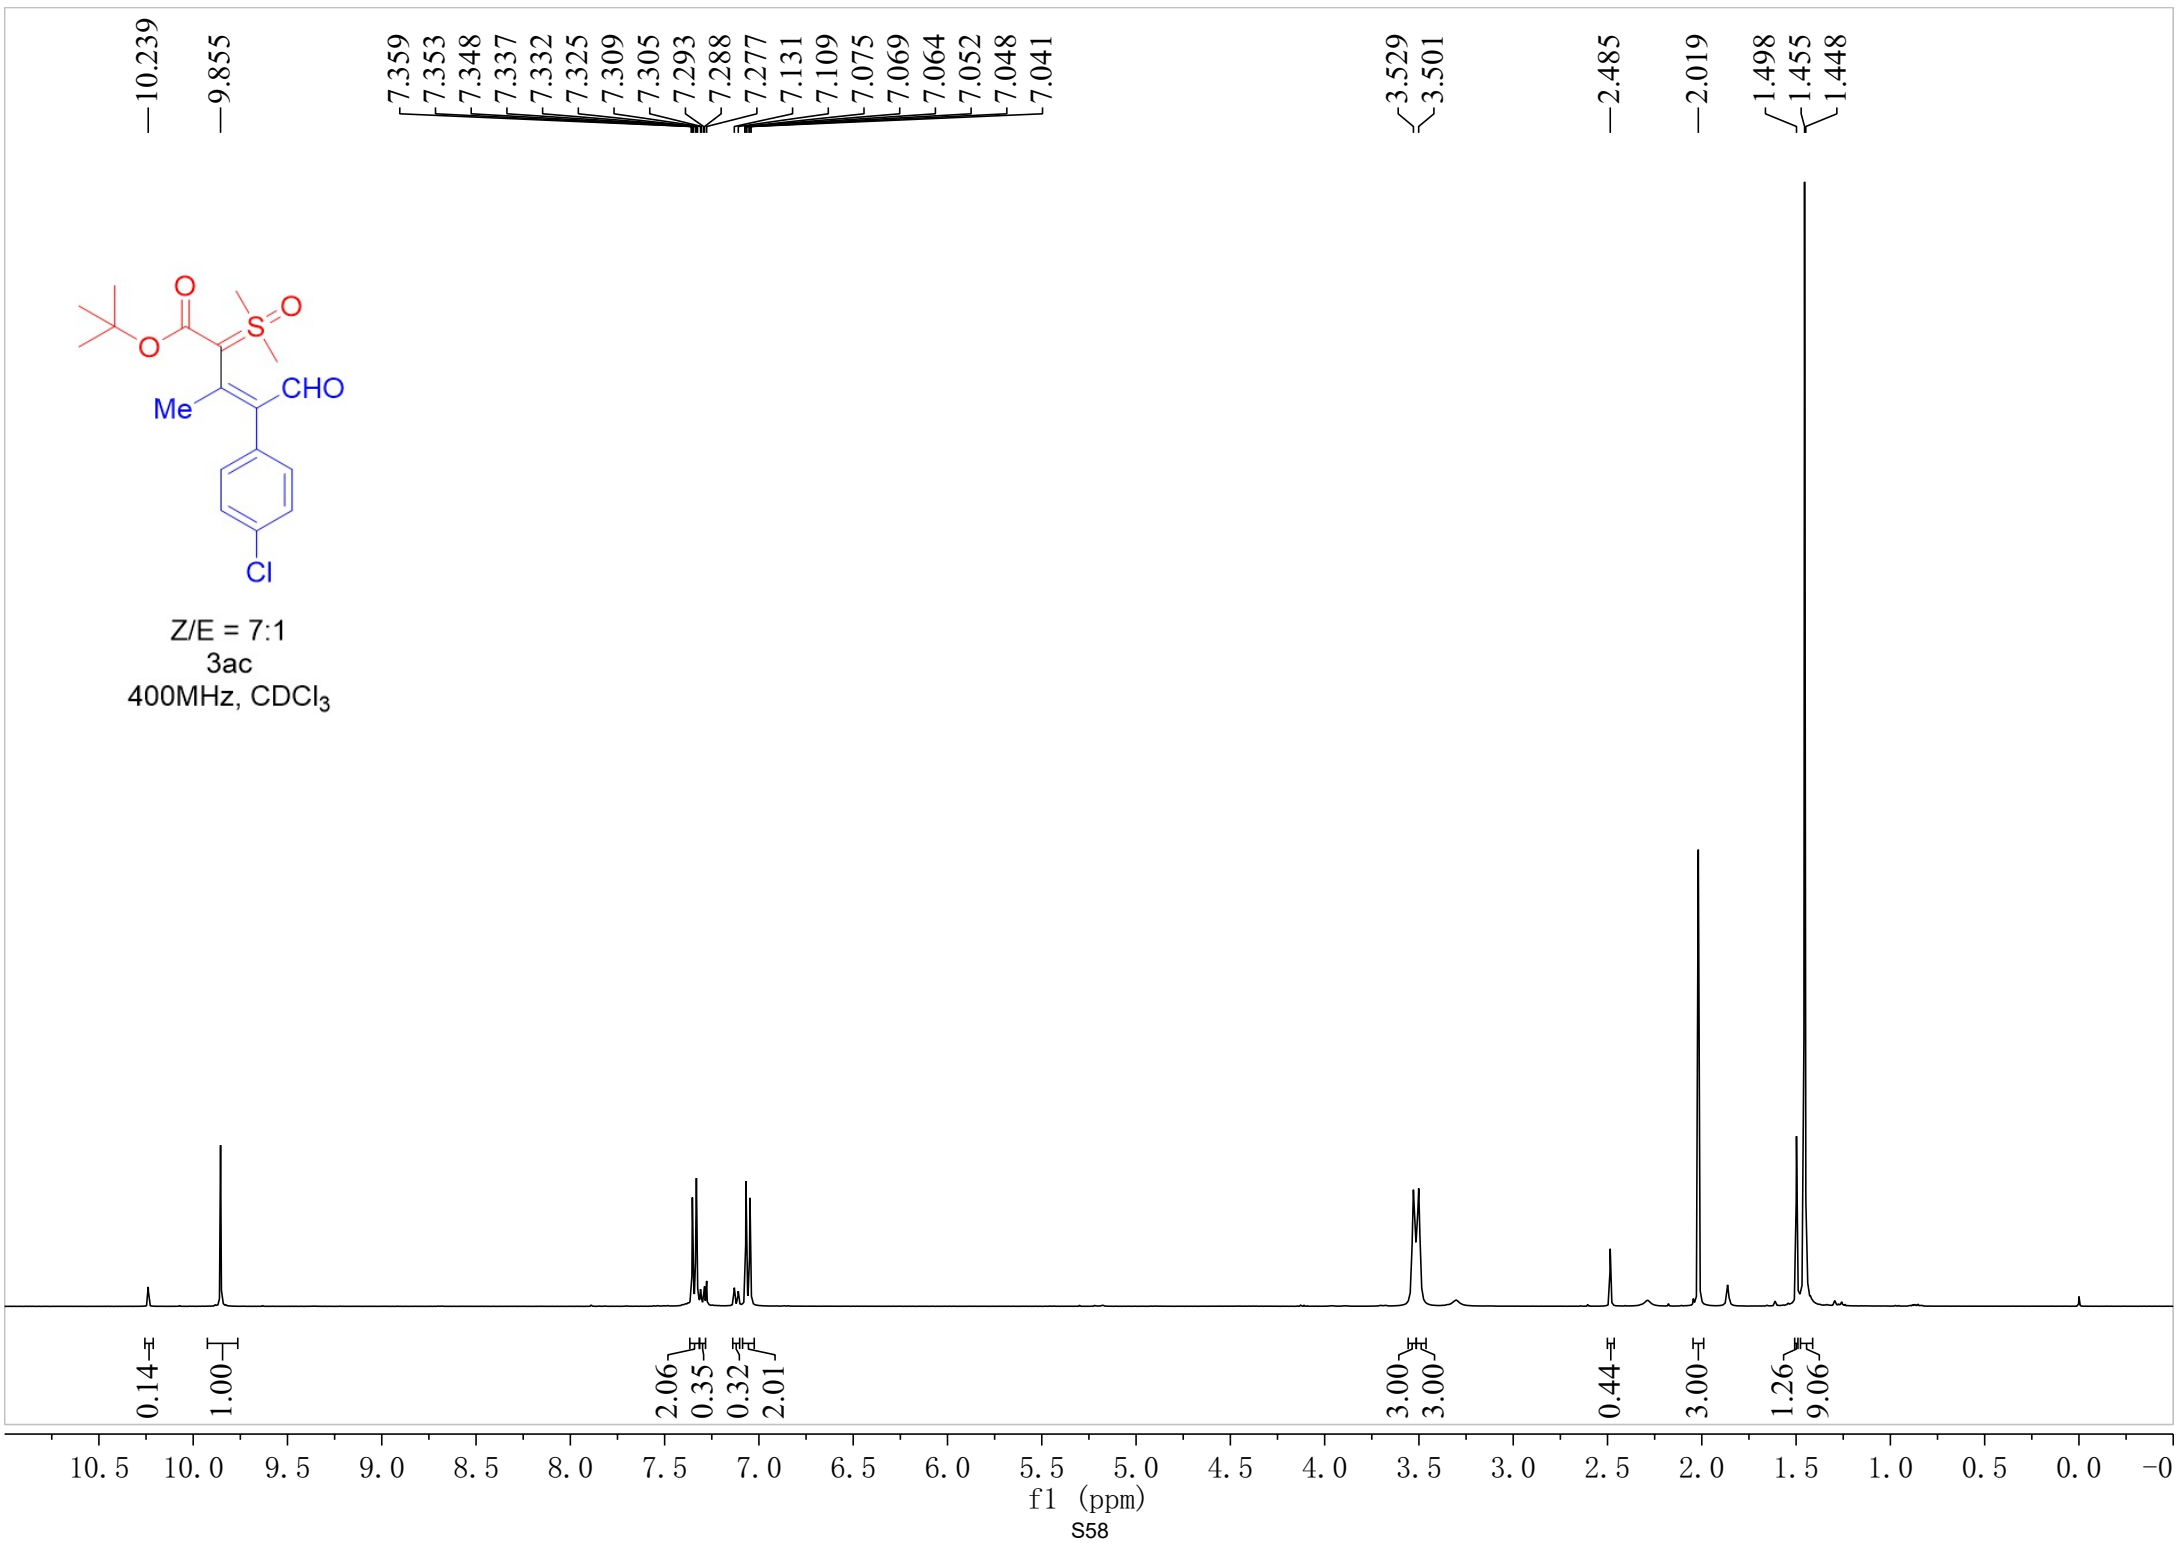

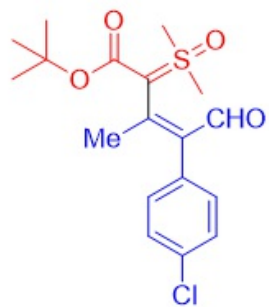

3ac  
101 MHz, CDCl<sub>3</sub>

—190.99  
—165.49  
—149.58  
~141.59  
/ 134.90  
/ 133.14  
—131.37  
~128.41  
—80.00  
—67.87  
{ 44.24  
{ 43.96  
28.71  
—24.52

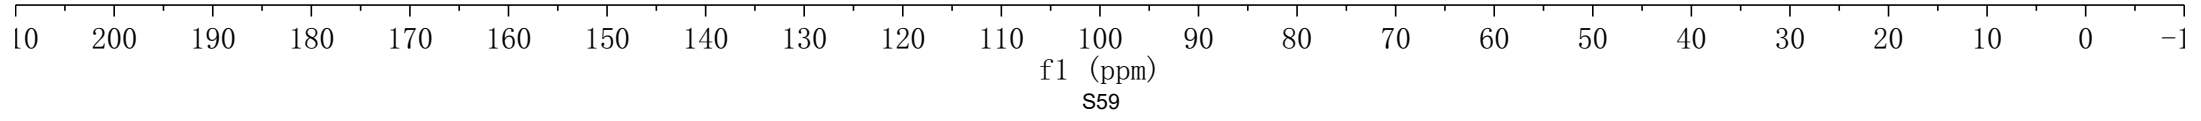

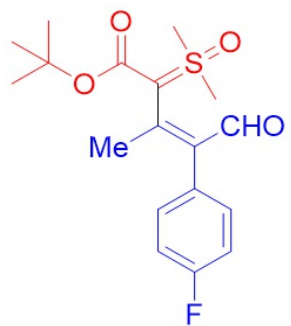

Z/E = 6:1  
3ad  
400 MHz, CDCl<sub>3</sub>

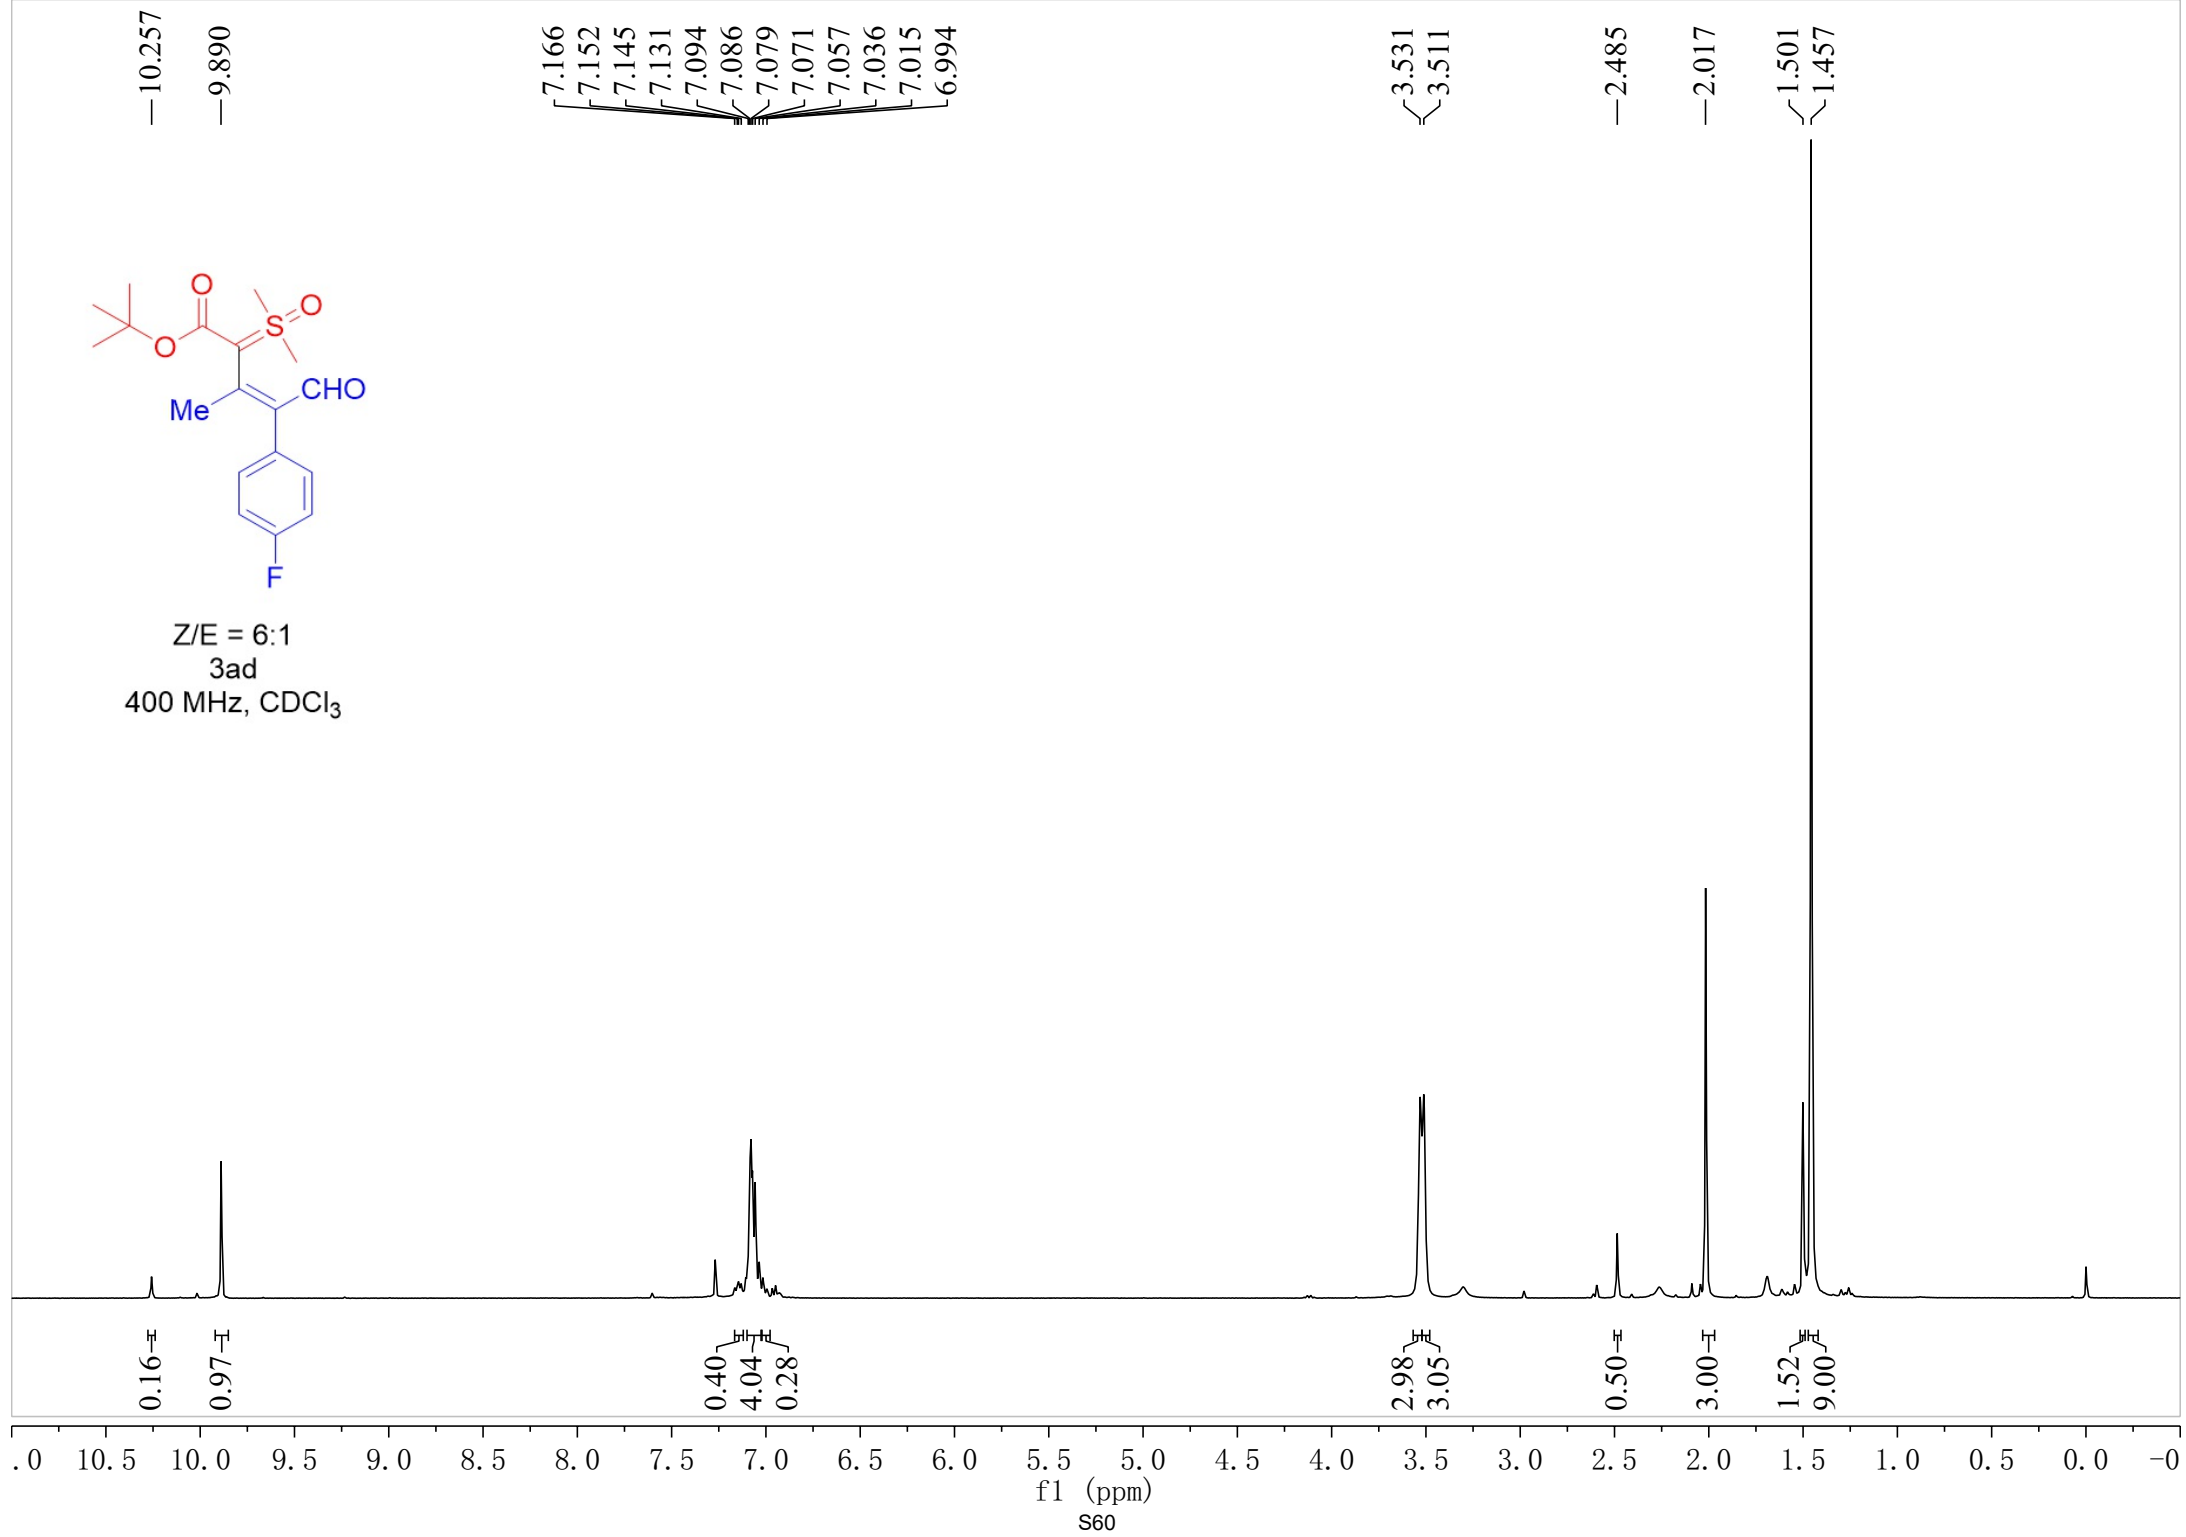

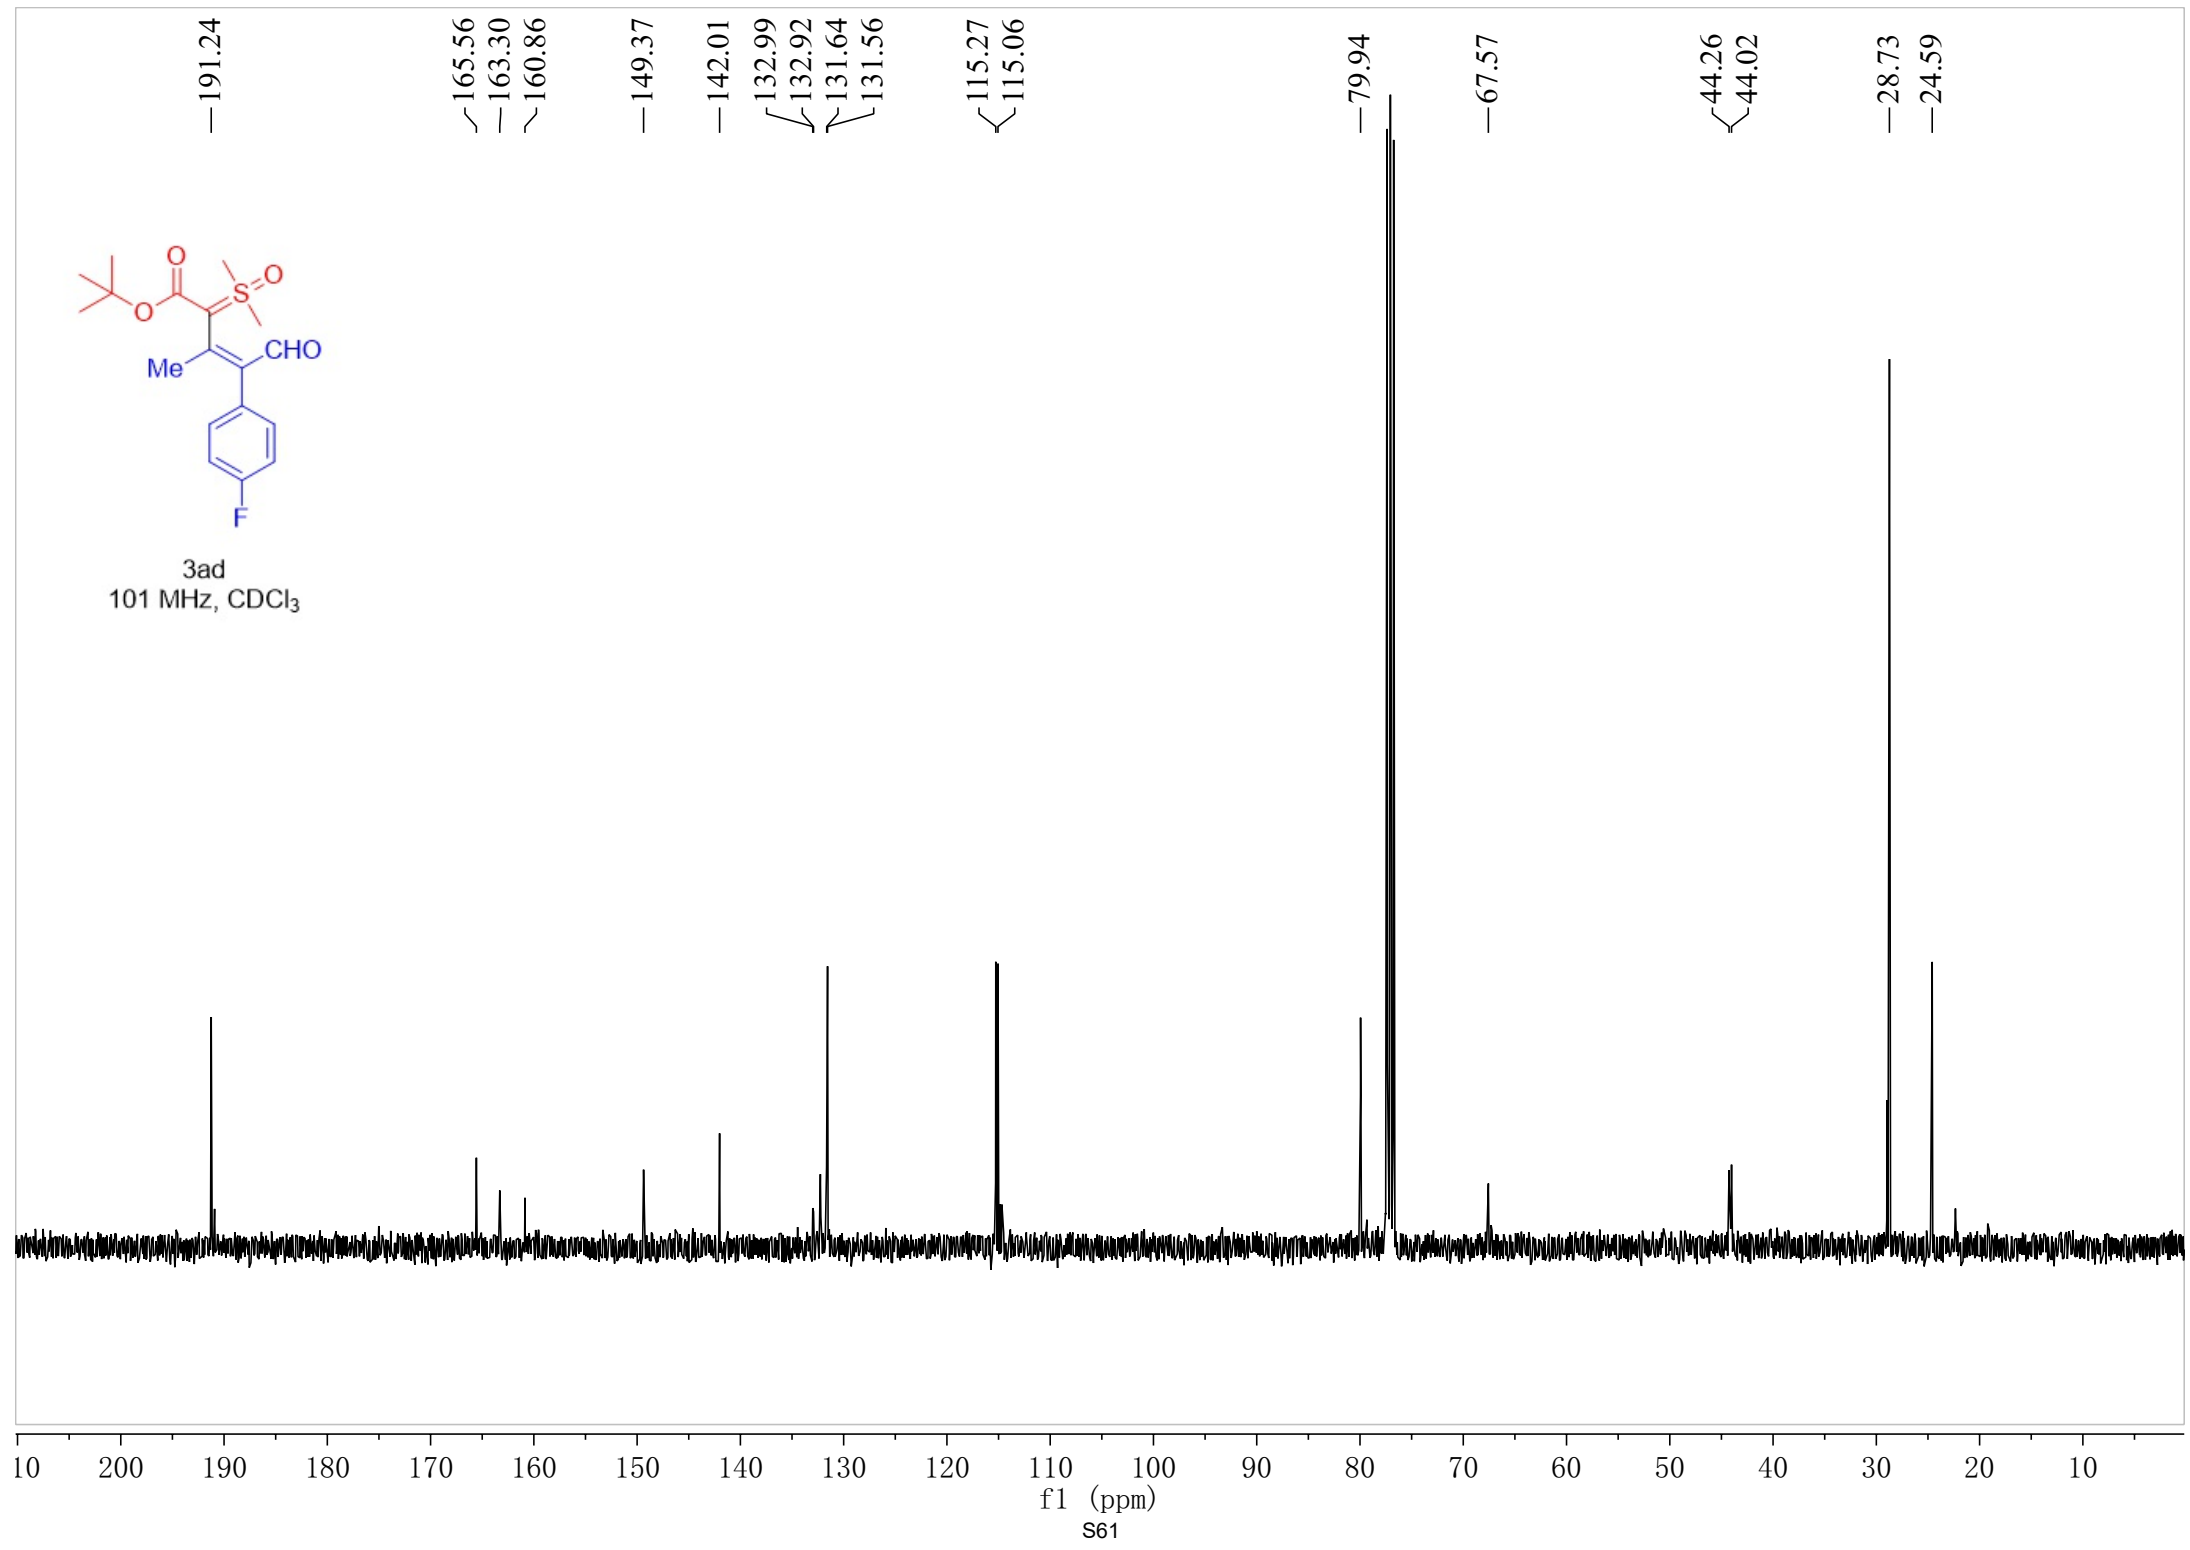

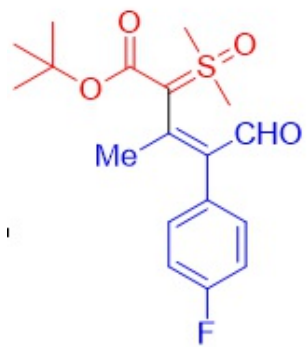

3ad  
282 MHz, CDCl<sub>3</sub>

-115.238

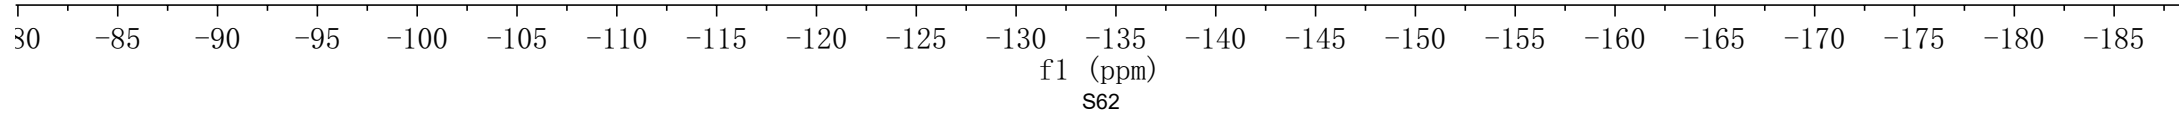

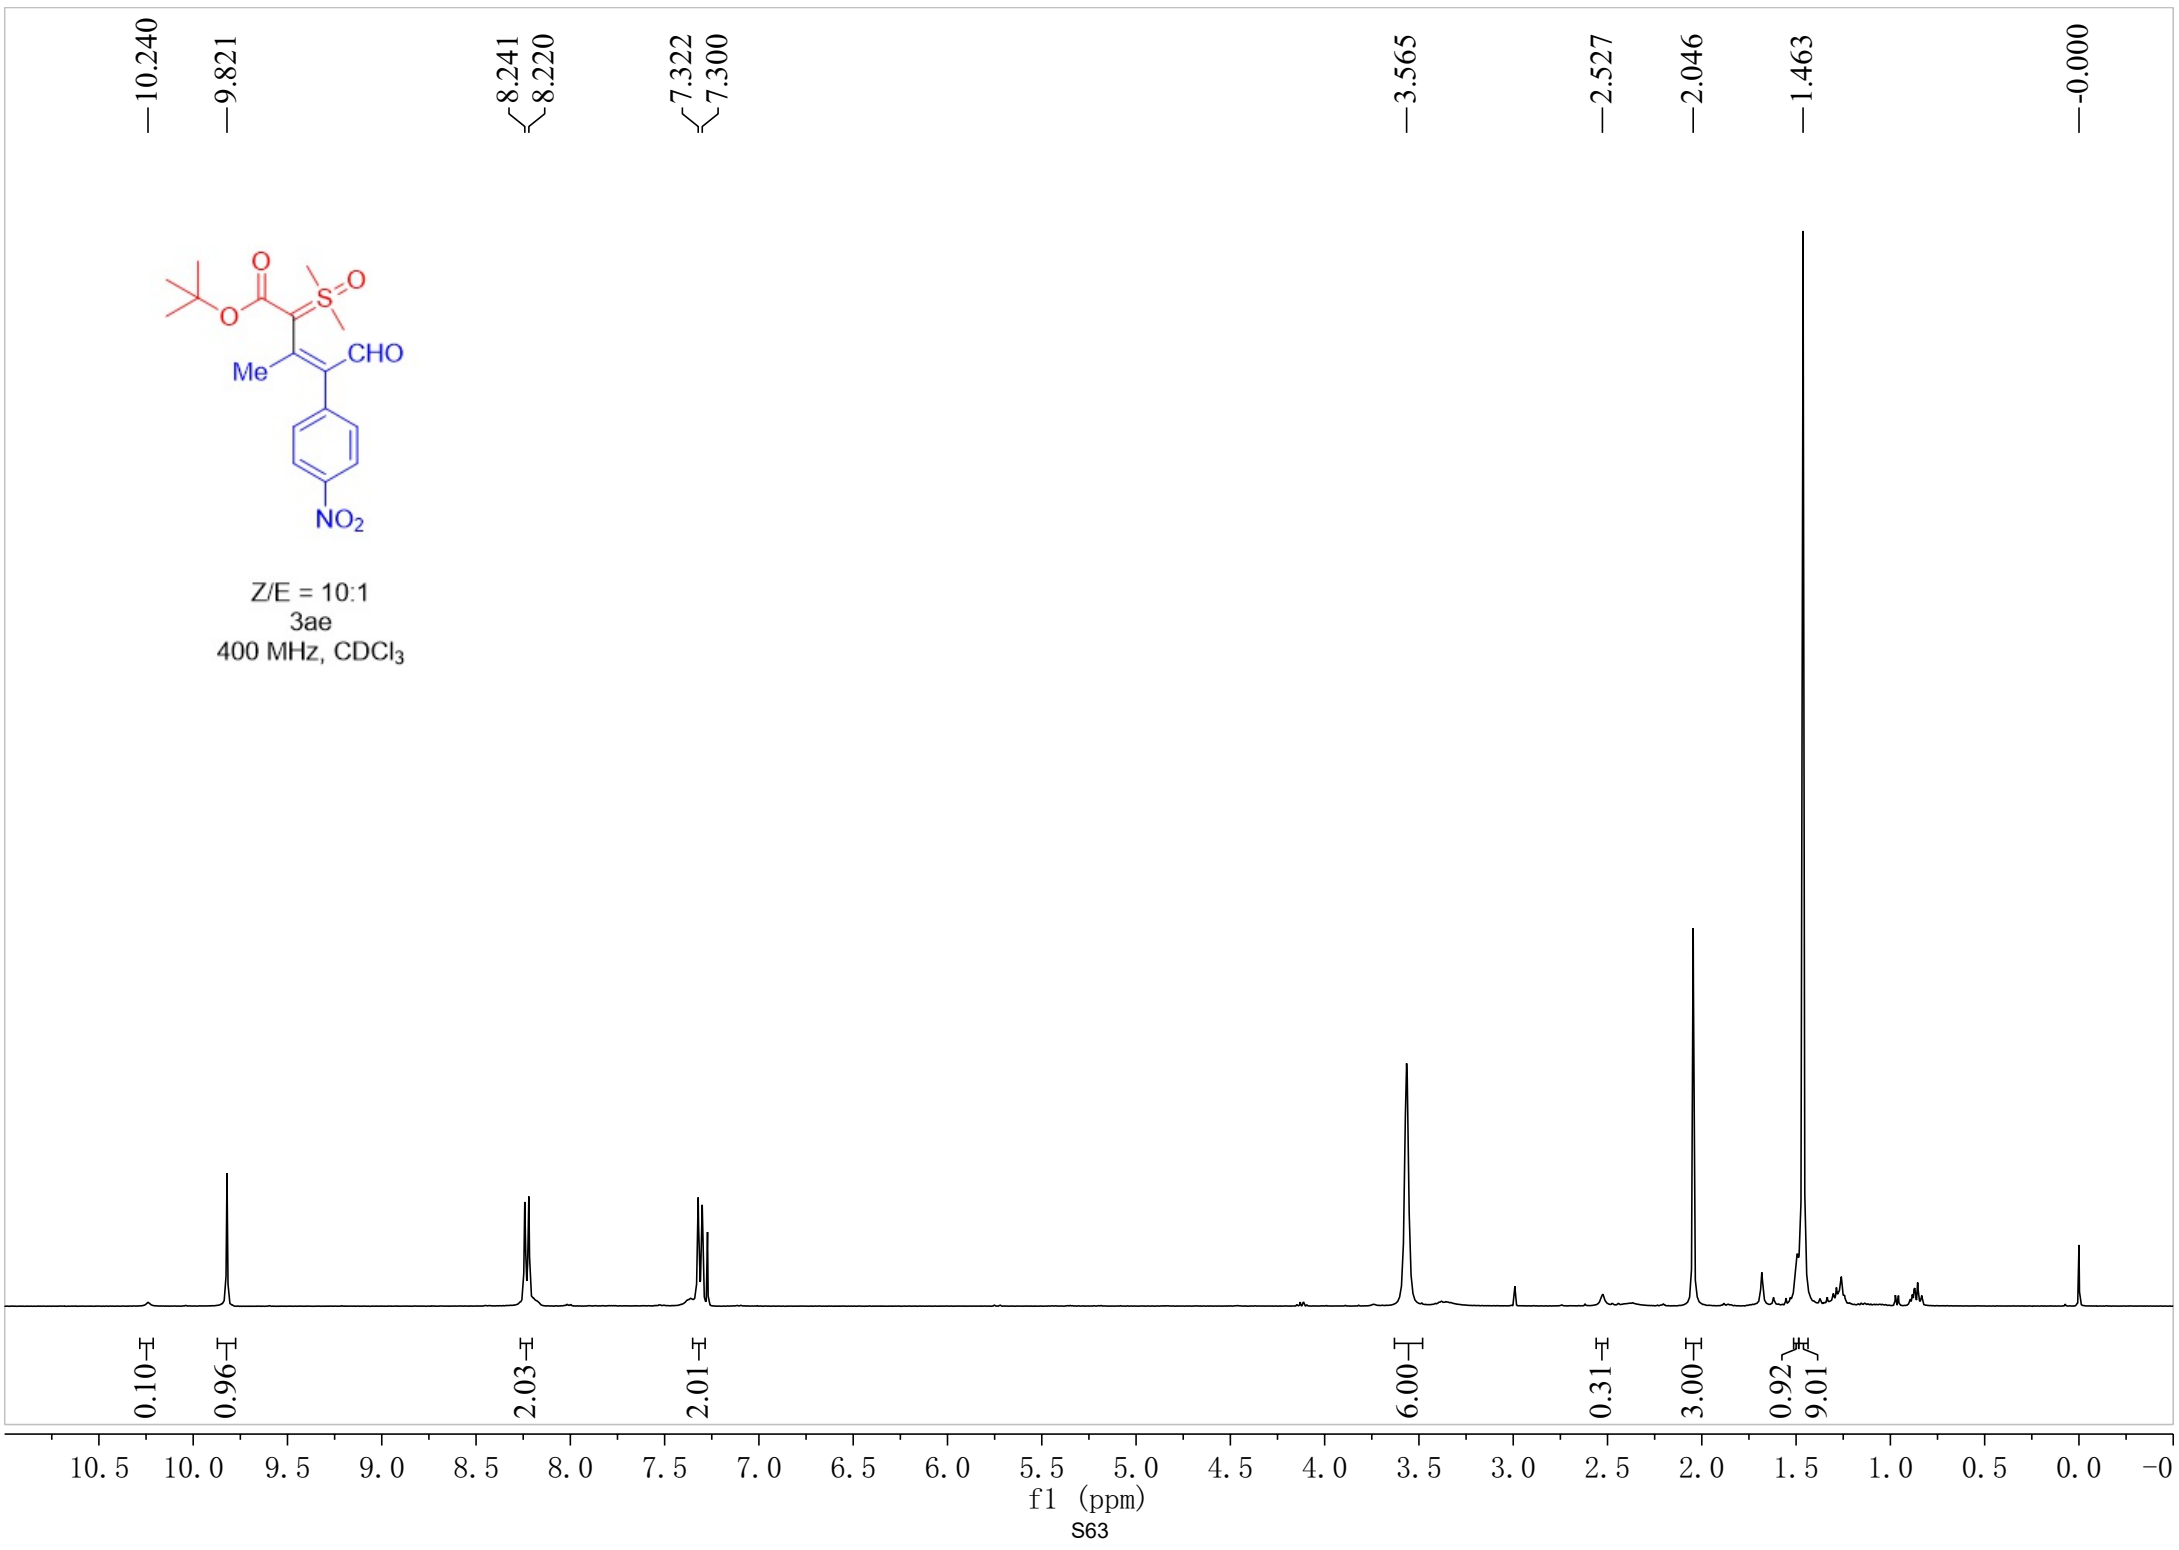

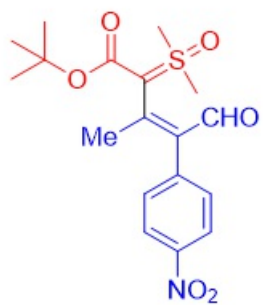

3ae  
101 MHz, CDCl<sub>3</sub>

—189.97

—165.45

~150.18

—146.93

~144.03

~140.19

—131.15

—123.38

—80.36

—68.17

—44.57

—44.28

—28.68

—24.39

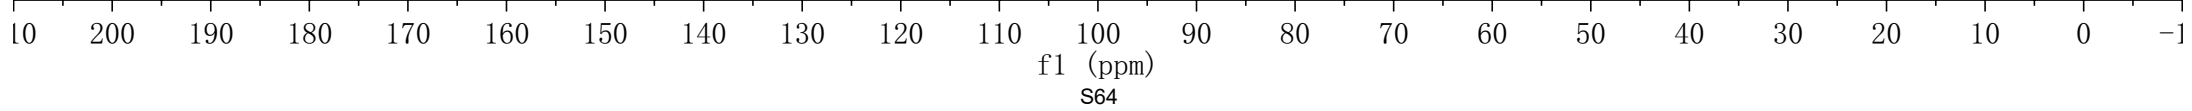

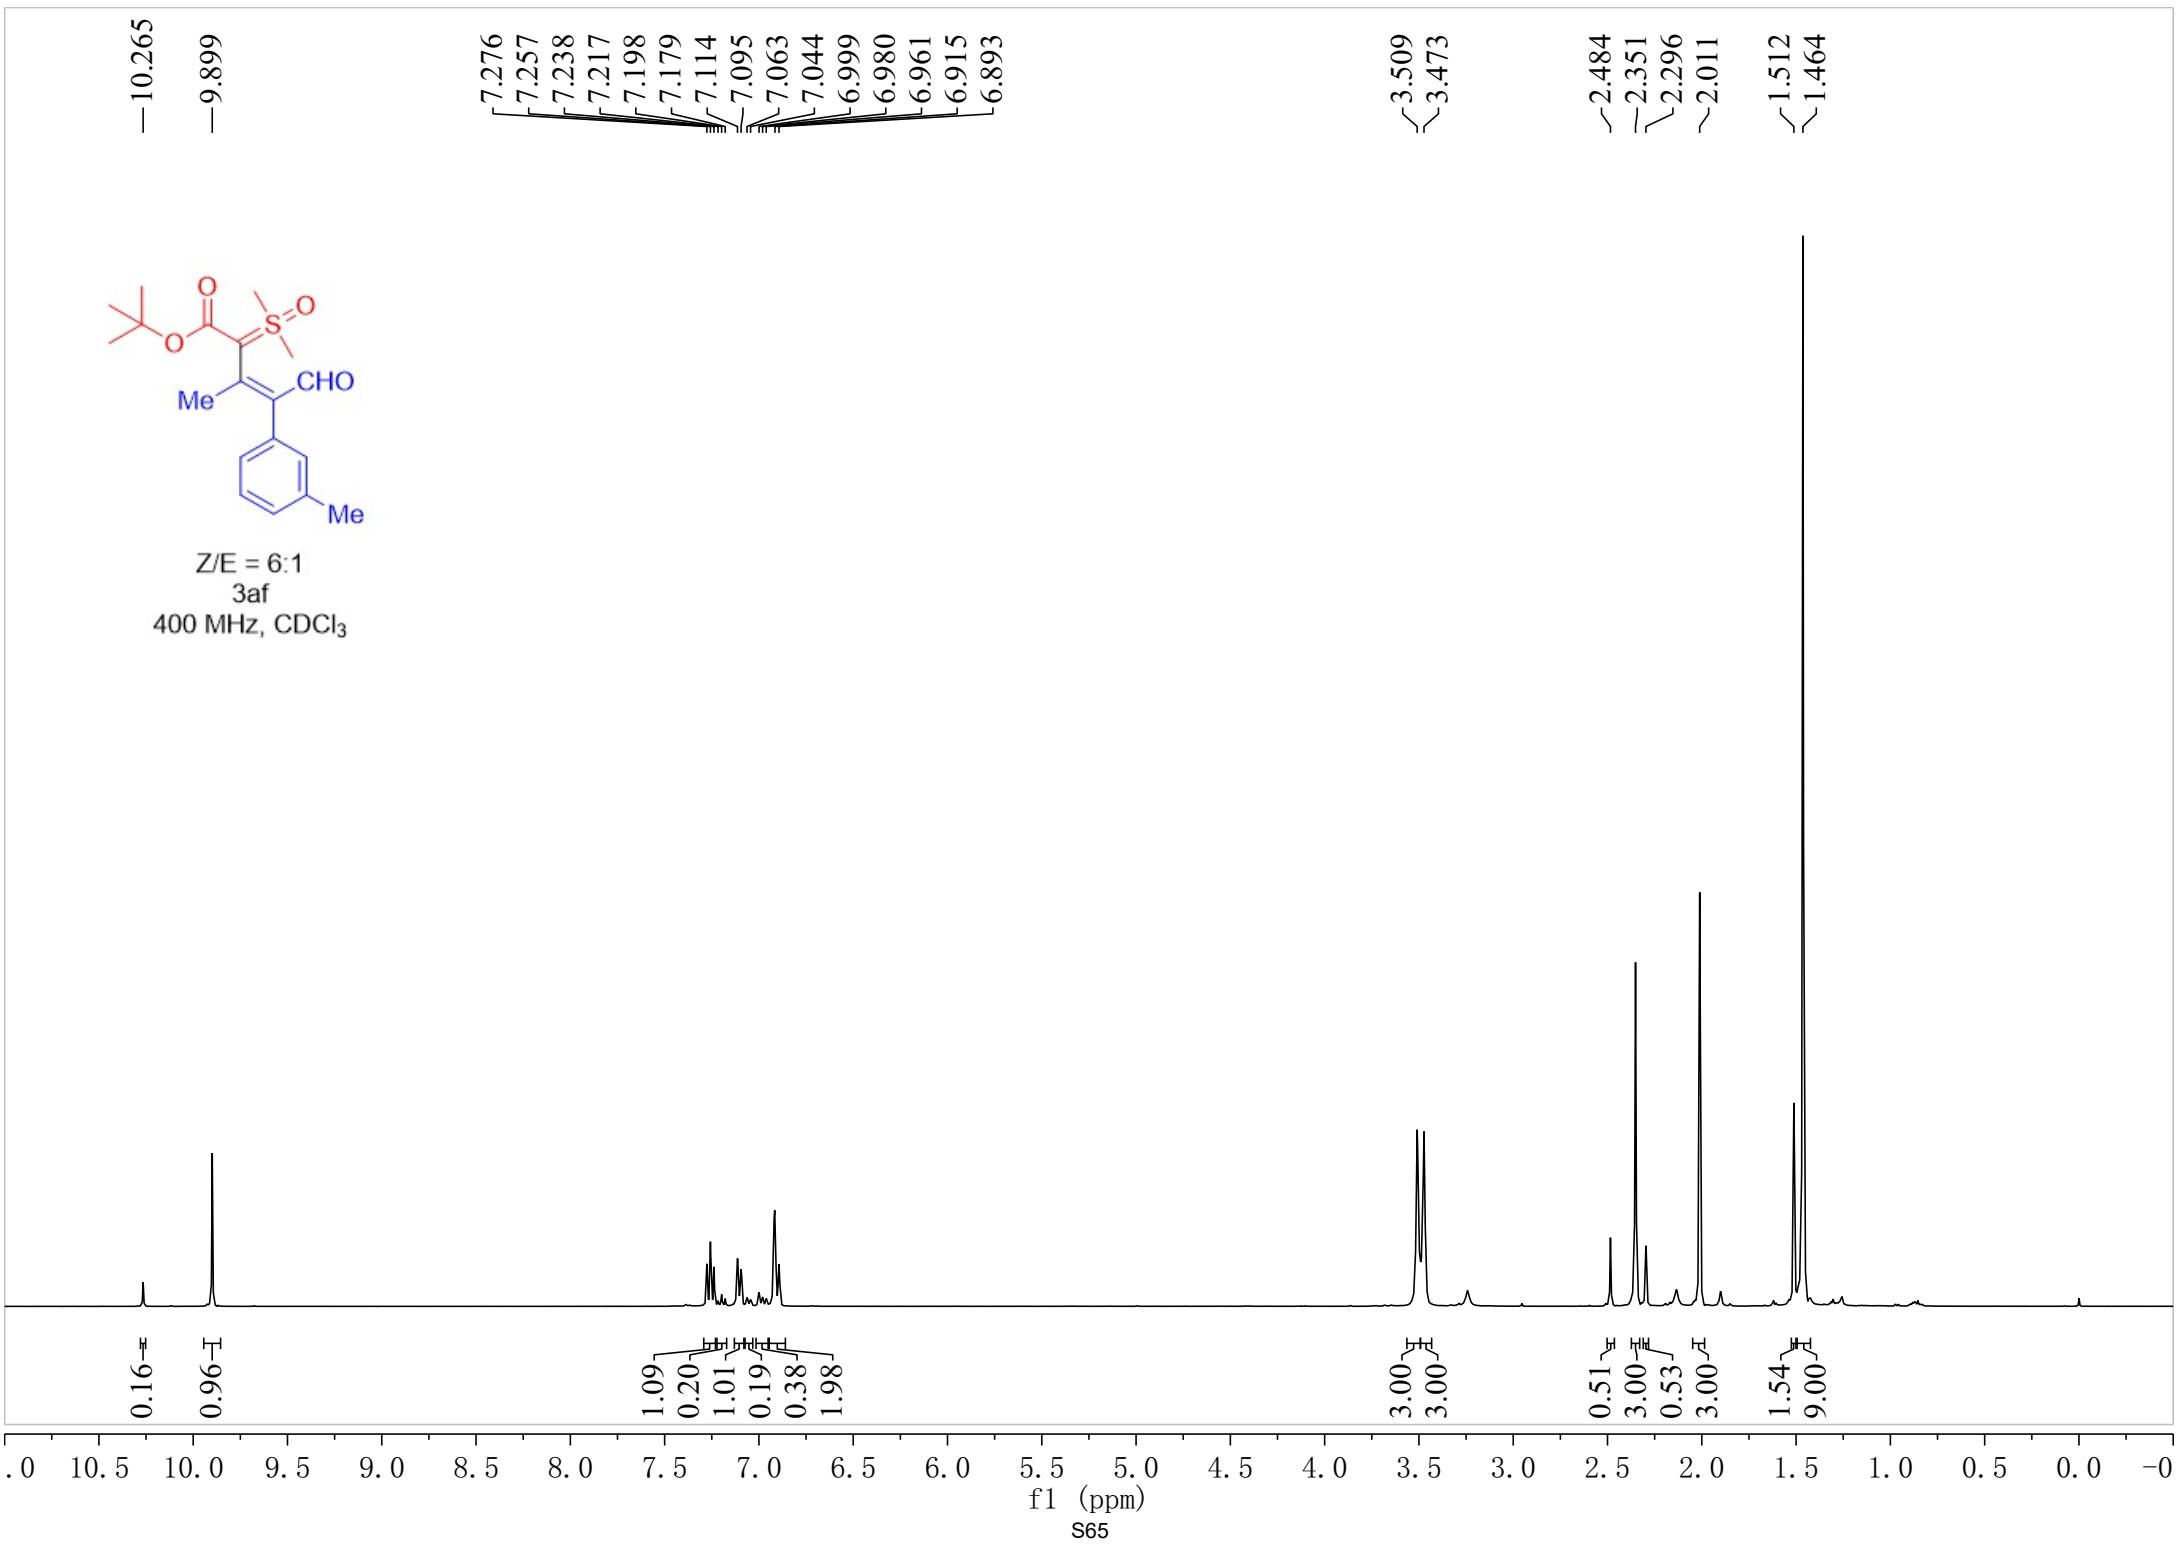

-191.67

-165.53

-149.31

-143.32

-137.68

-136.38

-130.46

-128.09

-127.91

-126.88

-79.79

-68.16

-43.97

-43.72

-28.76

-24.70

-21.51

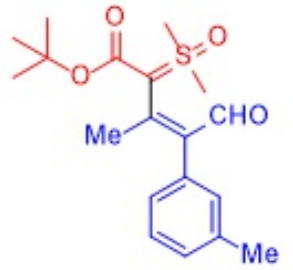

3af

101 MHz, CDCl<sub>3</sub>

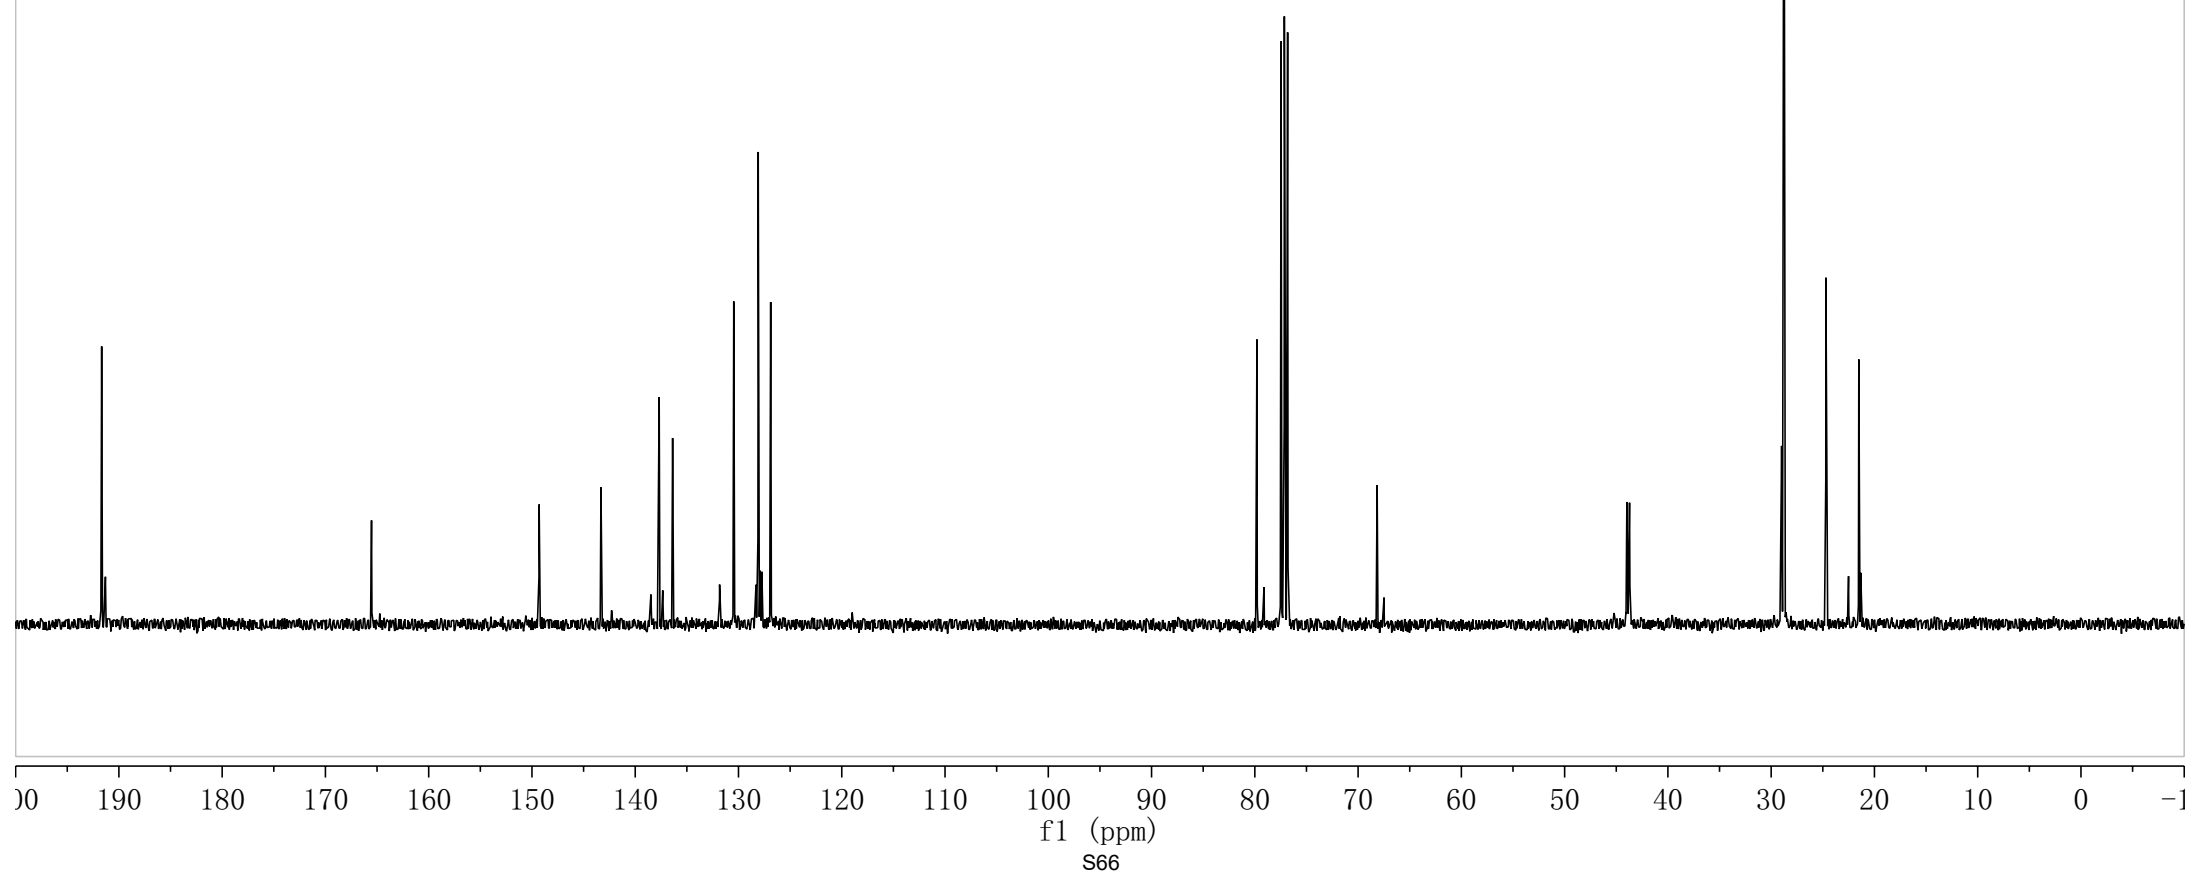

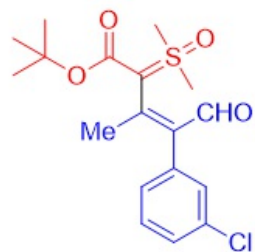

Z/E = 7:1  
 3ag  
 400 MHz, CDCl<sub>3</sub>

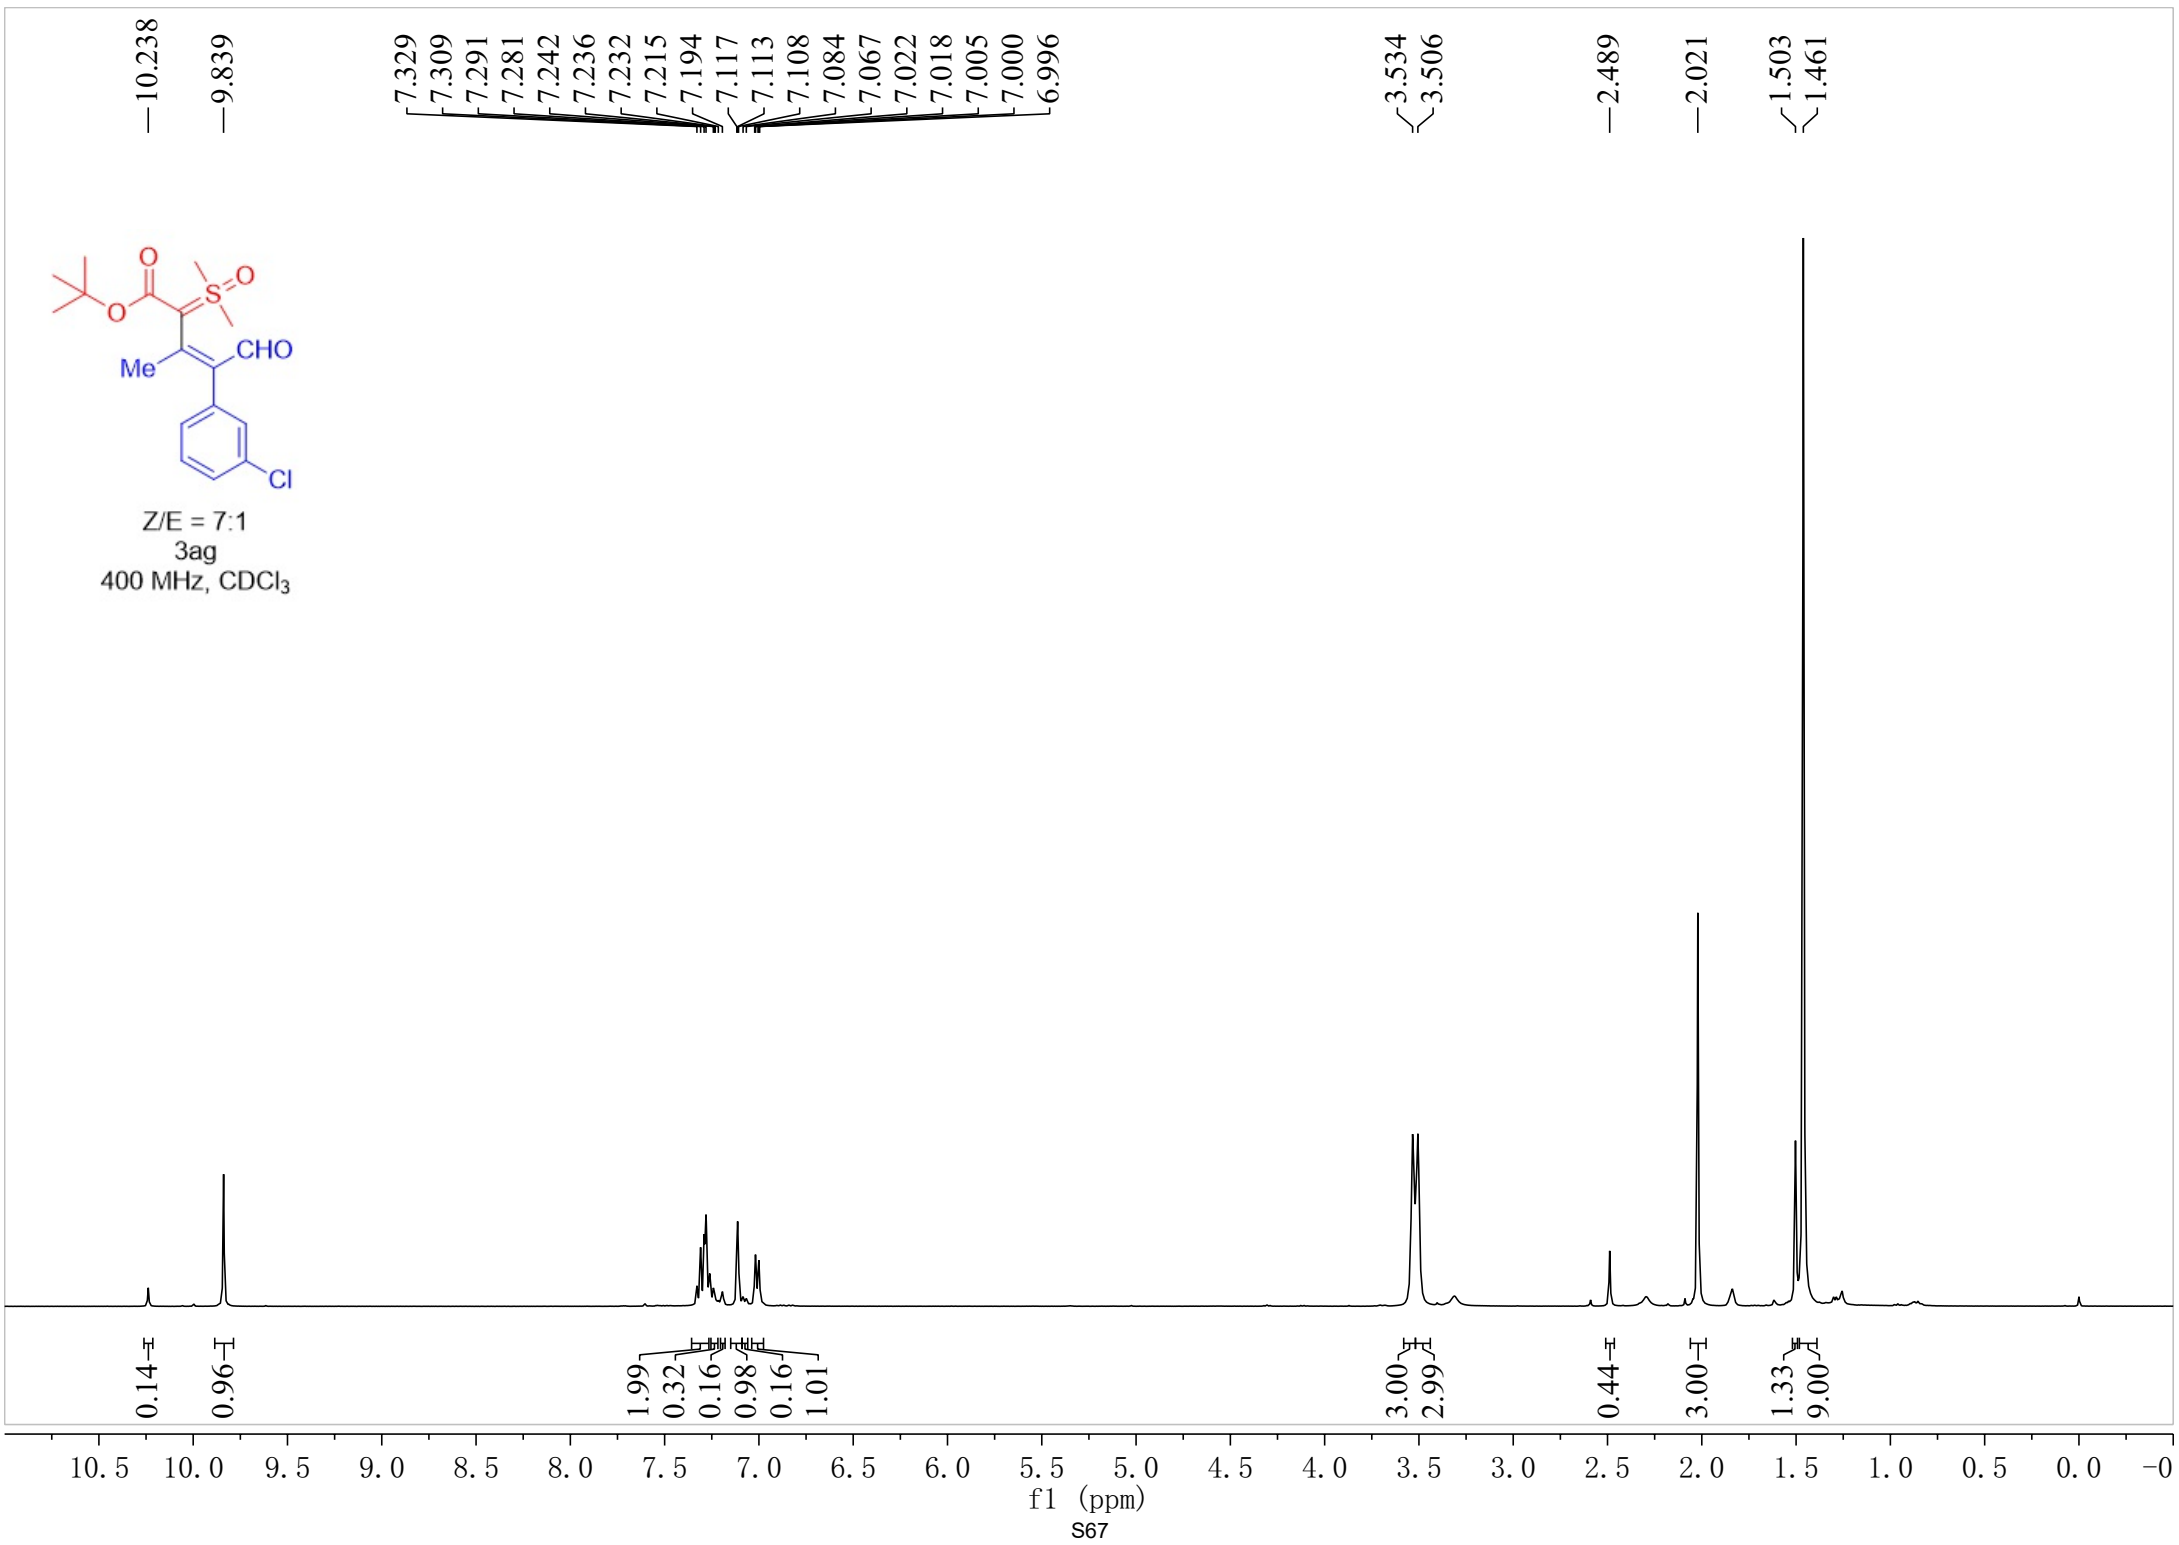

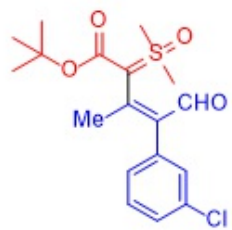

3ag  
101 MHz, CDCl<sub>3</sub>

—190.79

—165.48

—149.88

141.38

138.41

133.92

129.98

129.49

128.28

127.41

—80.06

—68.06

44.23

43.95

—28.73

—24.56

210 200 190 180 170 160 150 140 130 120 110 100 90 80 70 60 50 40 30 20 10 0 -10

f1 (ppm)

S68

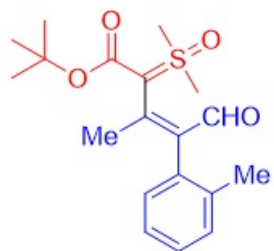

3ah  
300 MHz, (CD<sub>3</sub>)<sub>2</sub>SO

9.839

7.252  
7.242  
7.230  
7.225  
7.219  
7.209  
7.202  
7.197  
7.187  
7.175  
7.164  
7.152  
7.143  
6.918  
6.895

3.681  
3.585

2.059  
1.799

1.403

0.96

3.12

1.05

3.00

3.00

3.05

3.00

9.11

10.5 10.0 9.5 9.0 8.5 8.0 7.5 7.0 6.5 6.0 5.5 5.0 4.5 4.0 3.5 3.0 2.5 2.0 1.5 1.0 0.5 0.0 -0

f1 (ppm)  
S69

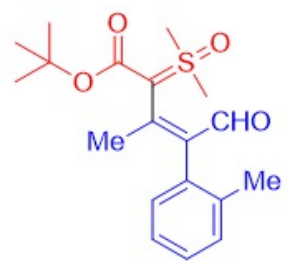

3ah  
75 MHz, (CD<sub>3</sub>)<sub>2</sub>SO

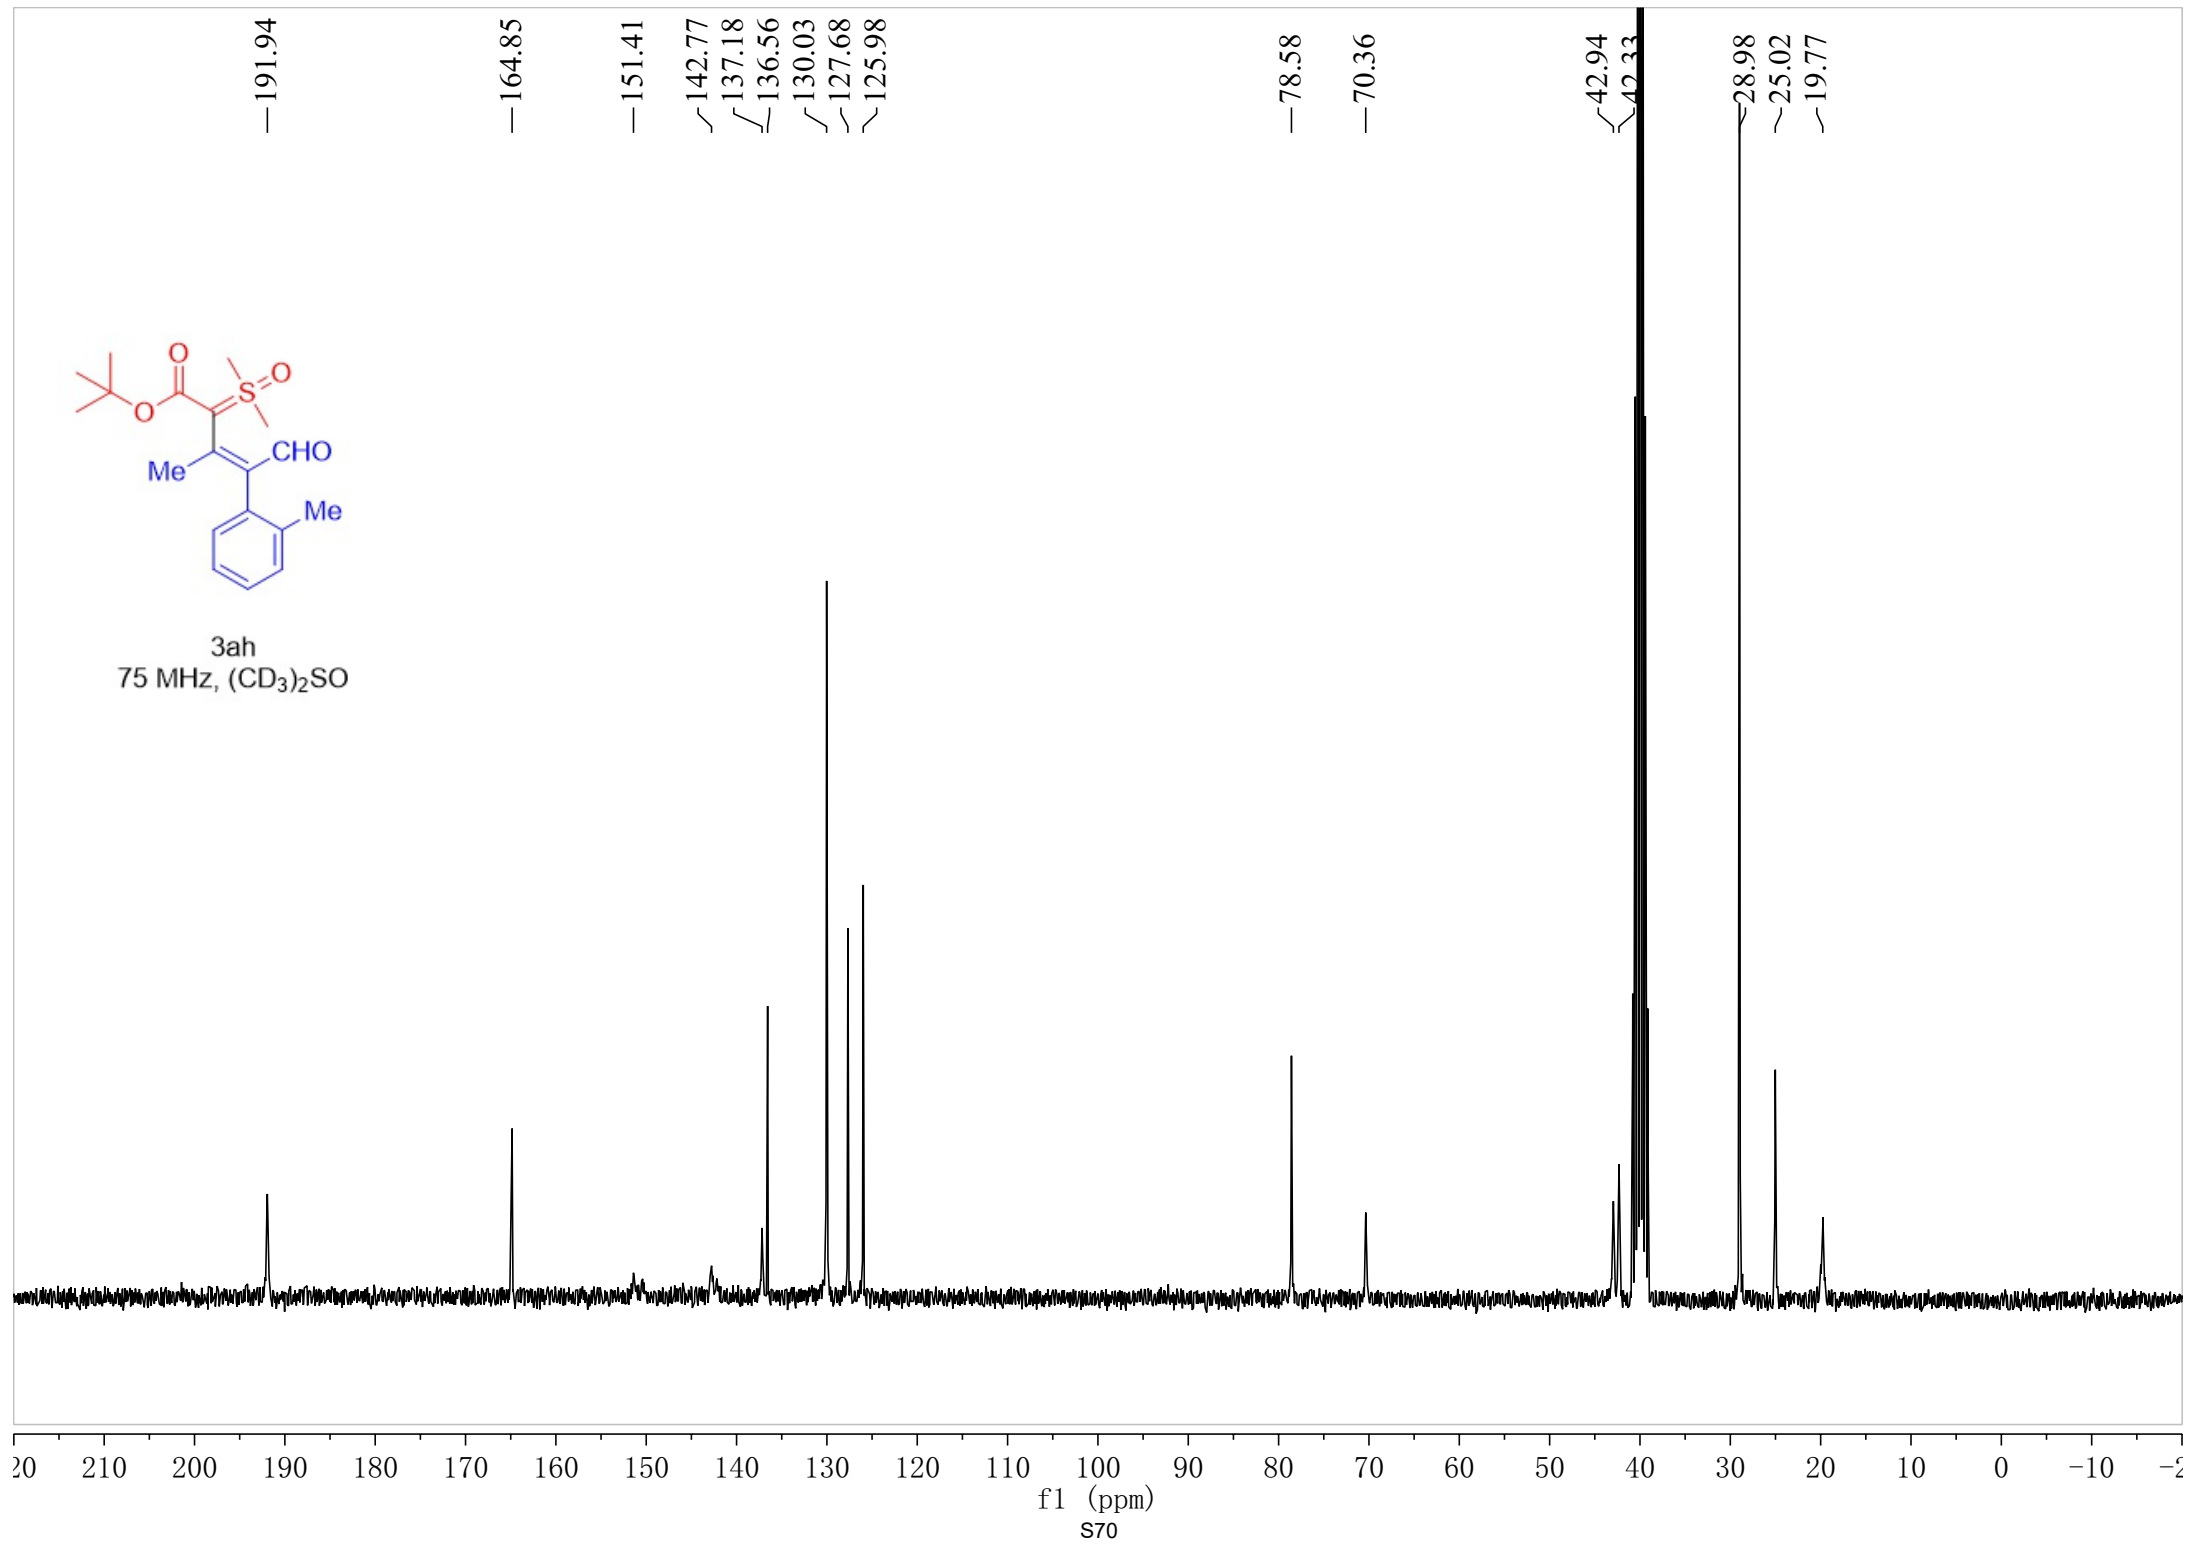

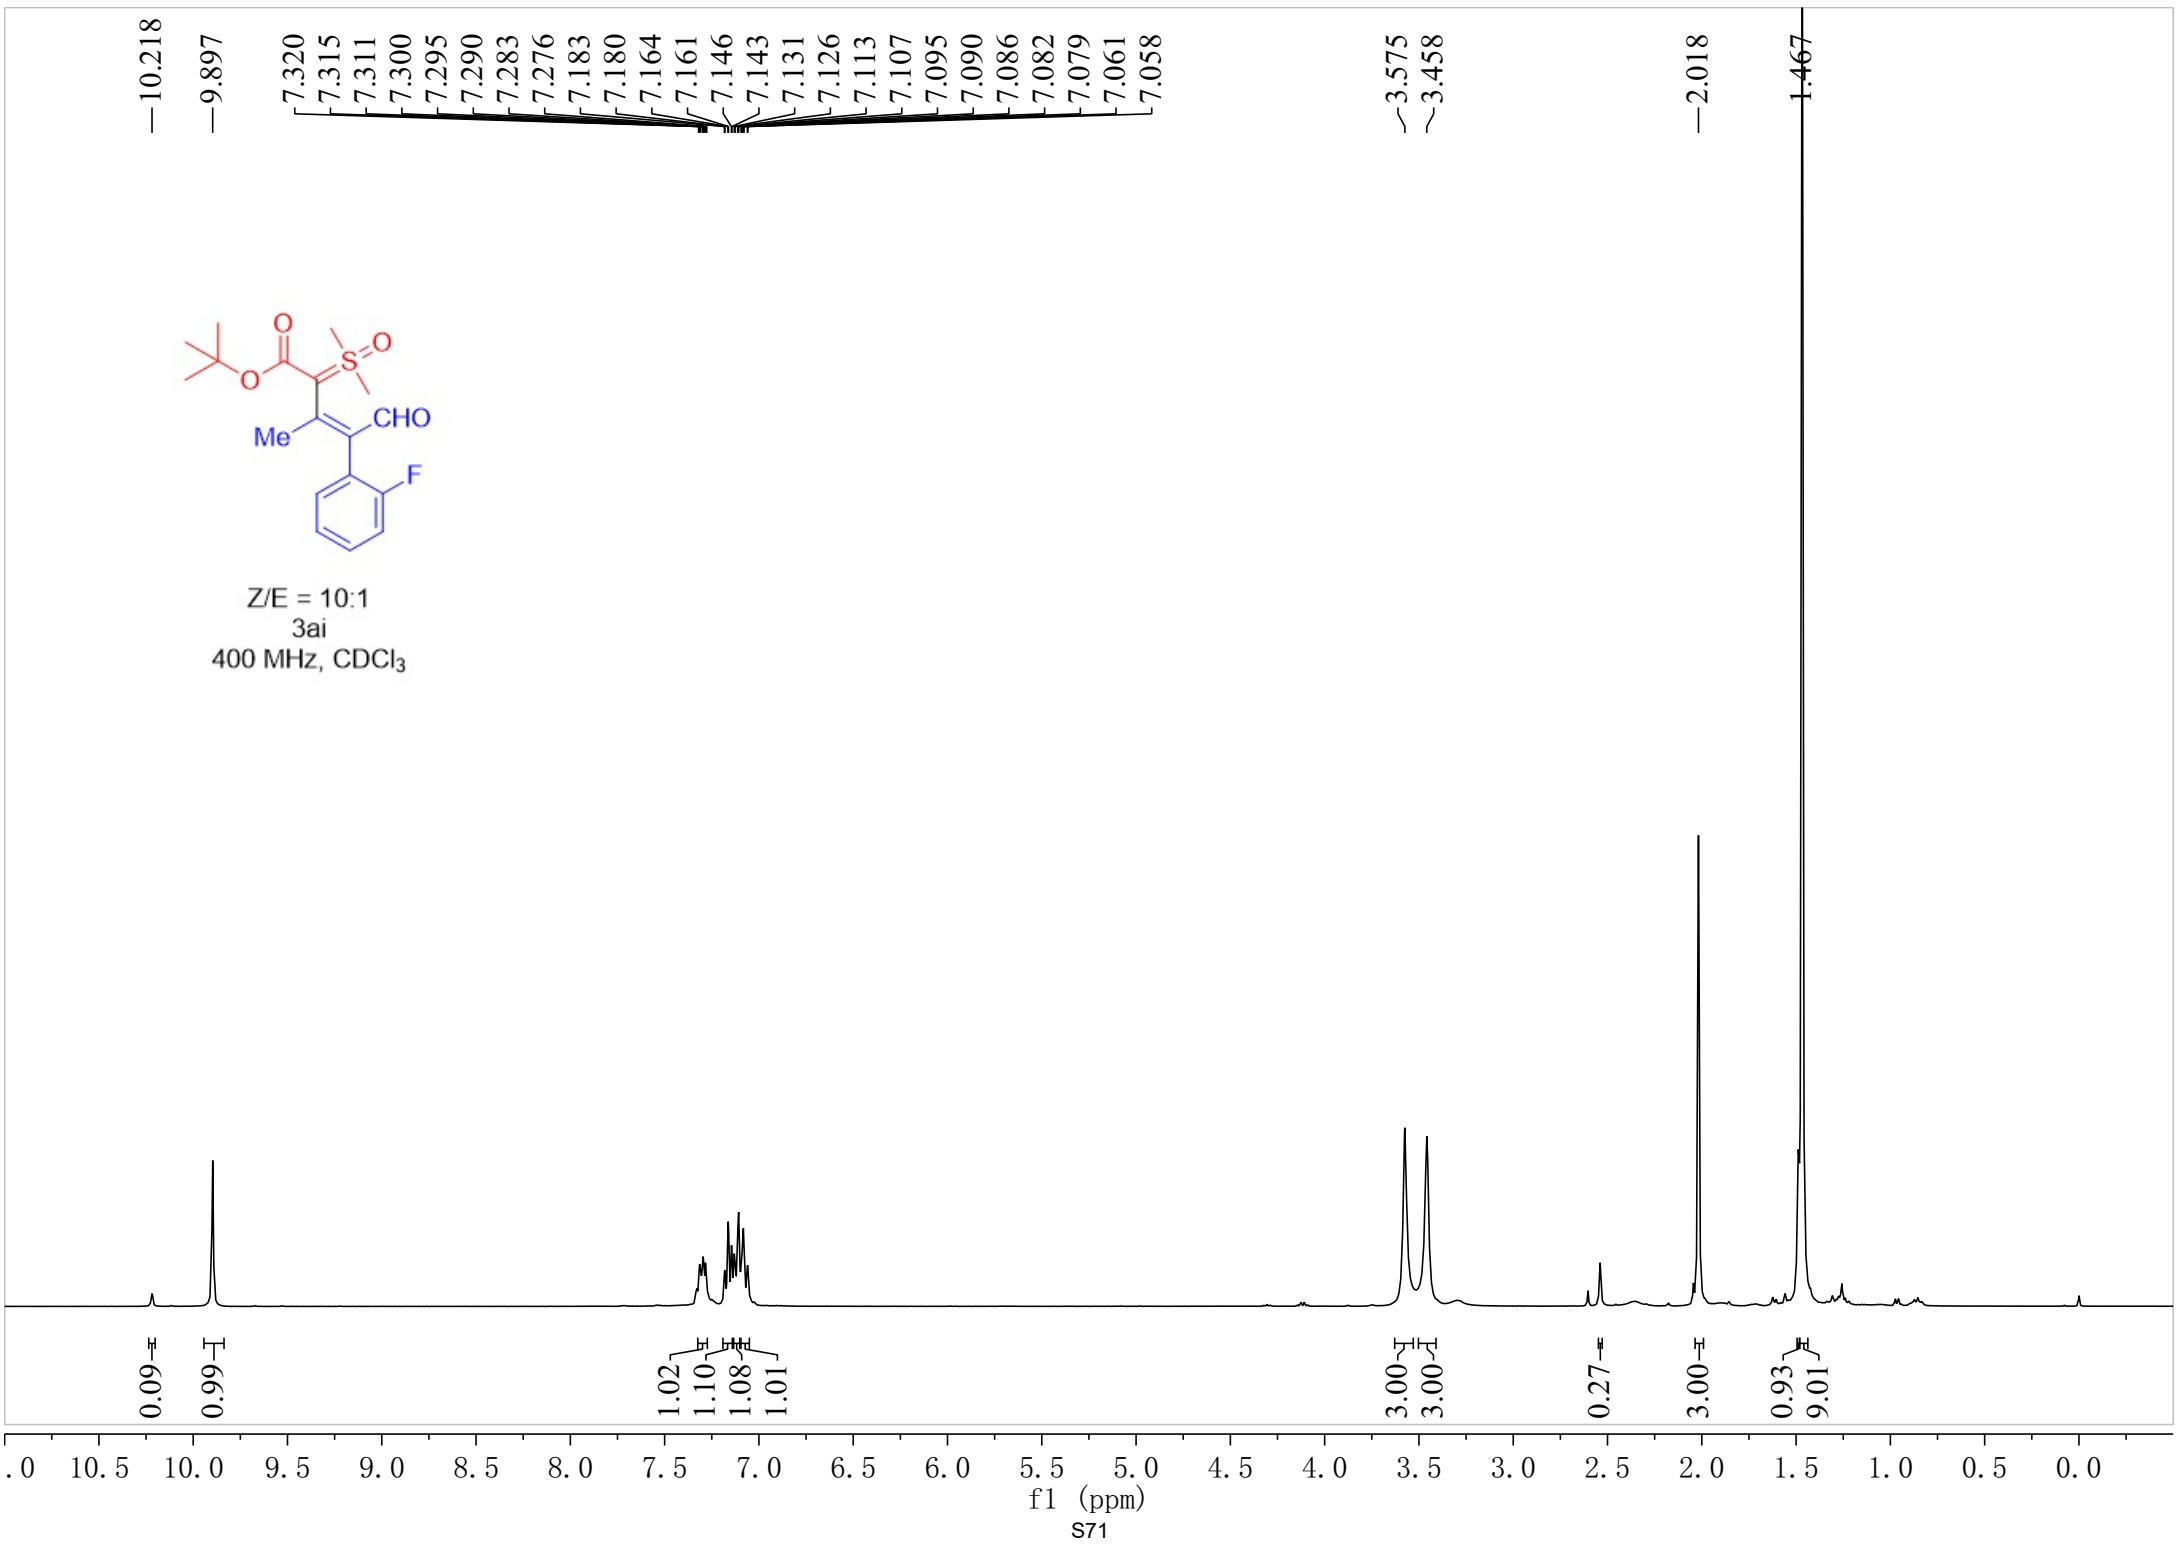

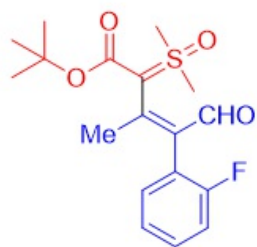

3ai  
101 MHz, CDCl<sub>3</sub>

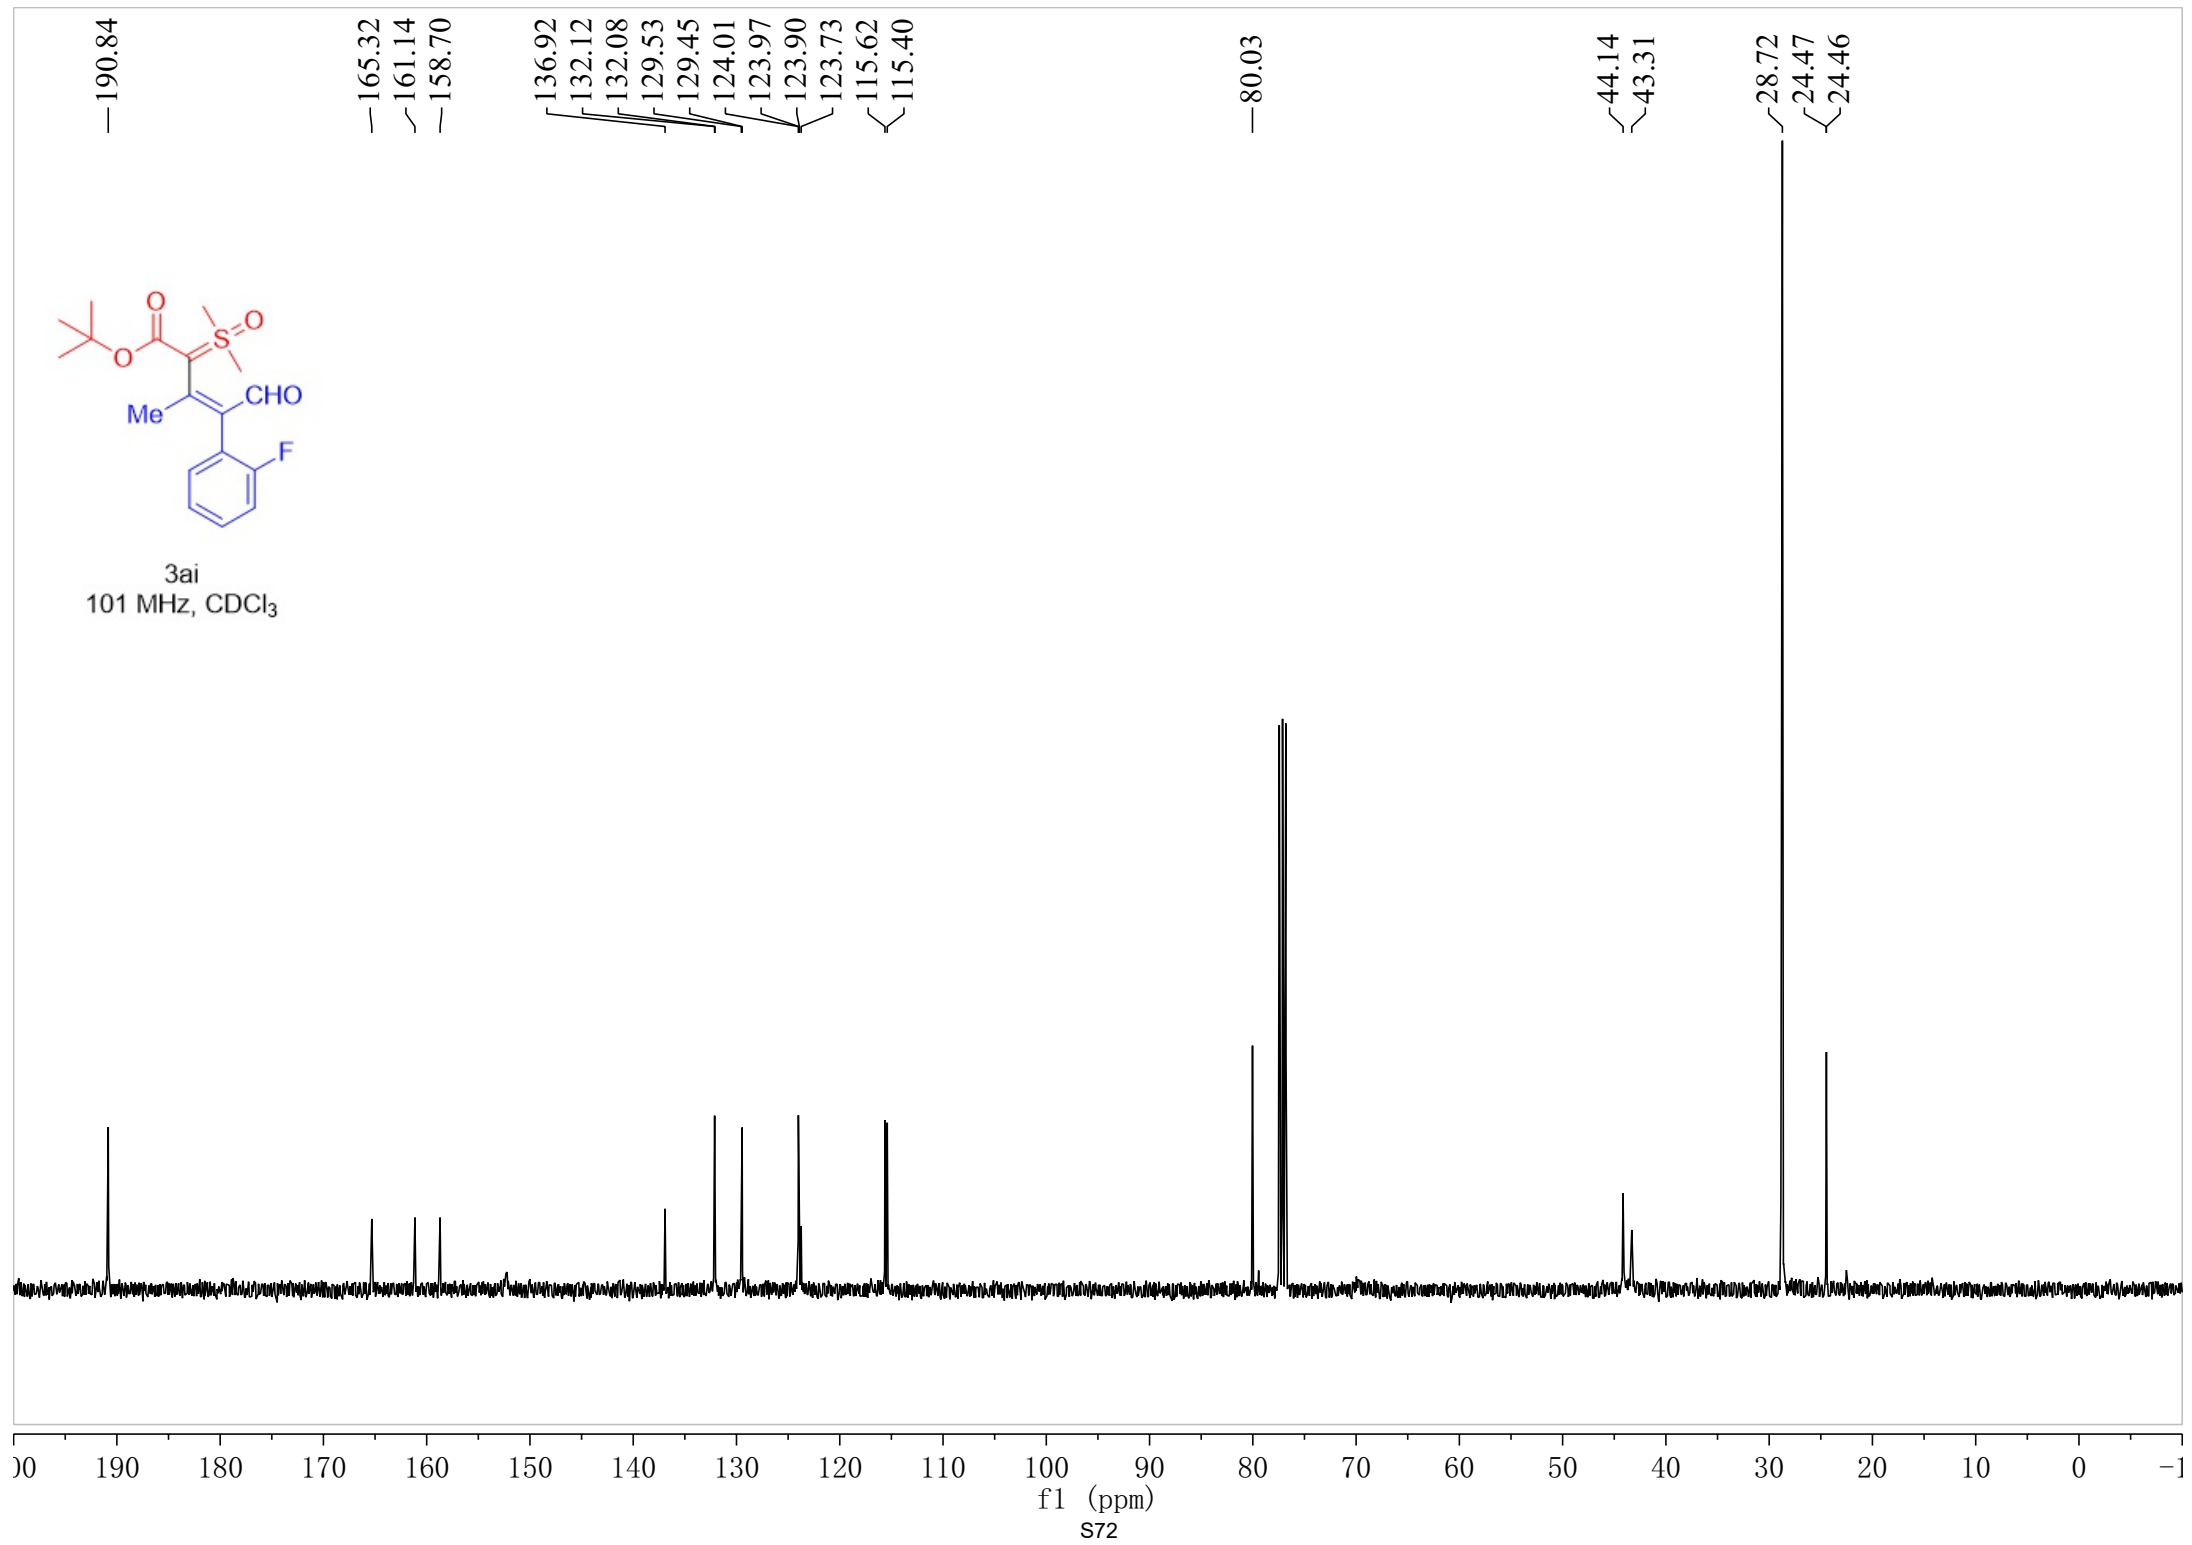

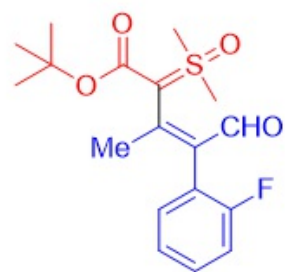

3ai  
282 MHz, CDCl<sub>3</sub>

--113.799

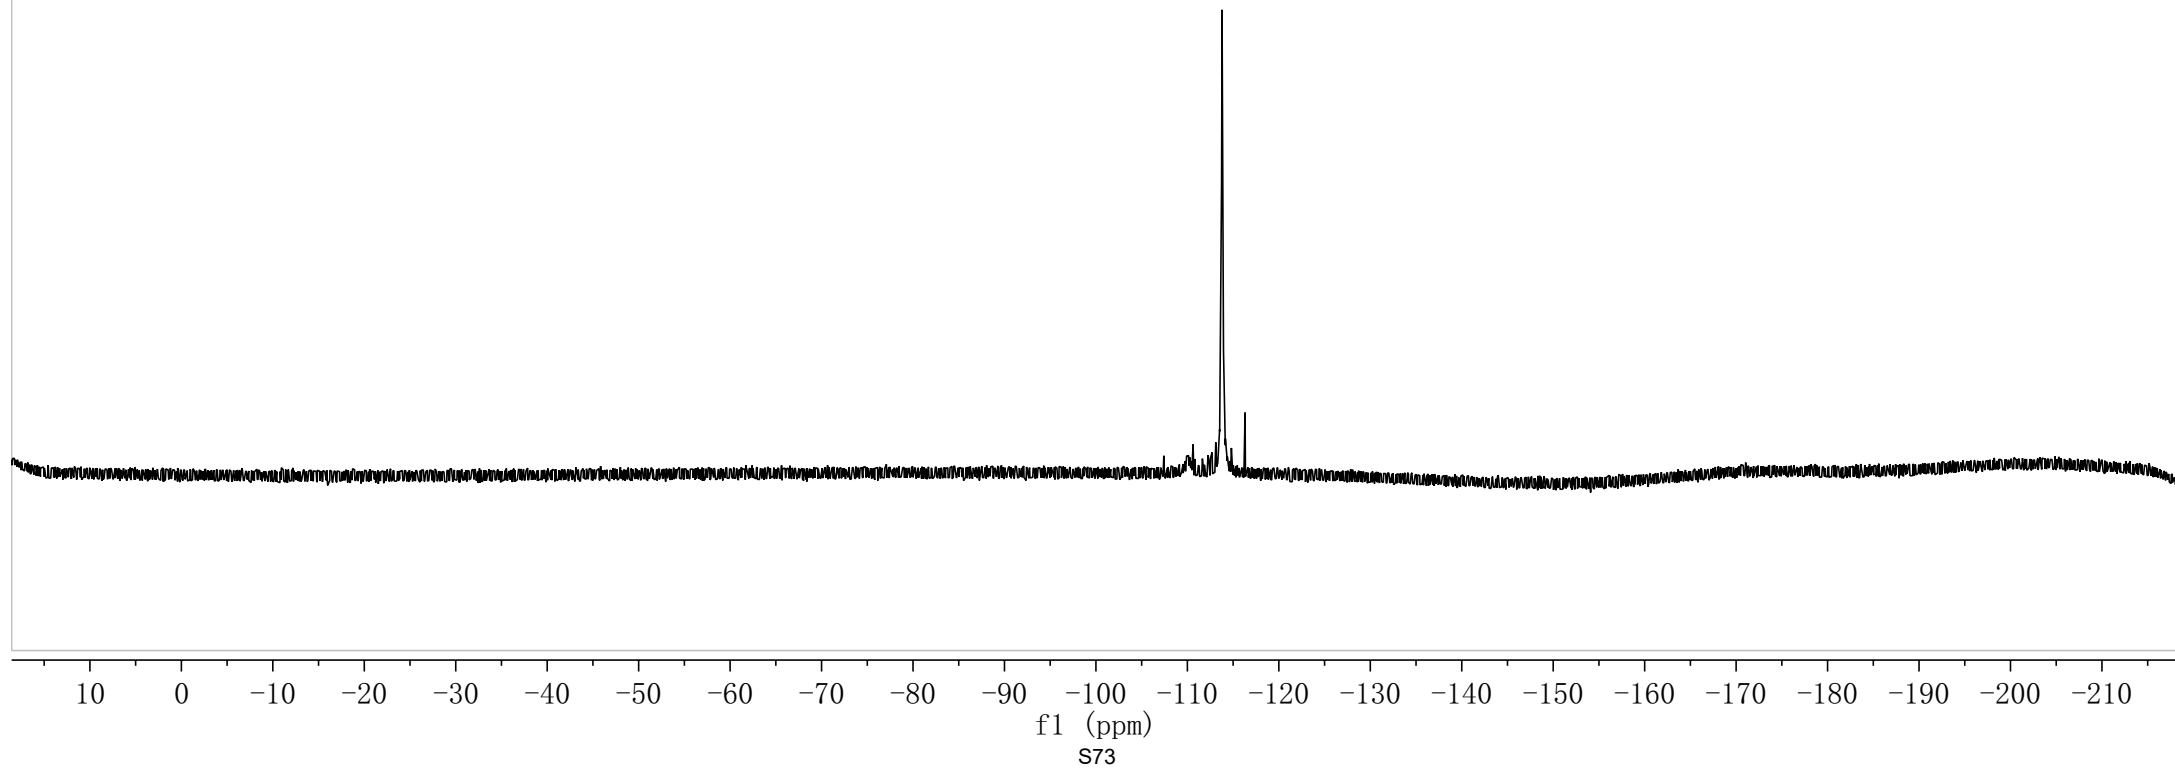

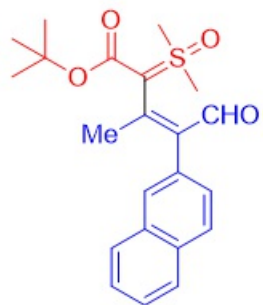

Z/E = 7:1  
 3aj  
 400 MHz, CDCl<sub>3</sub>

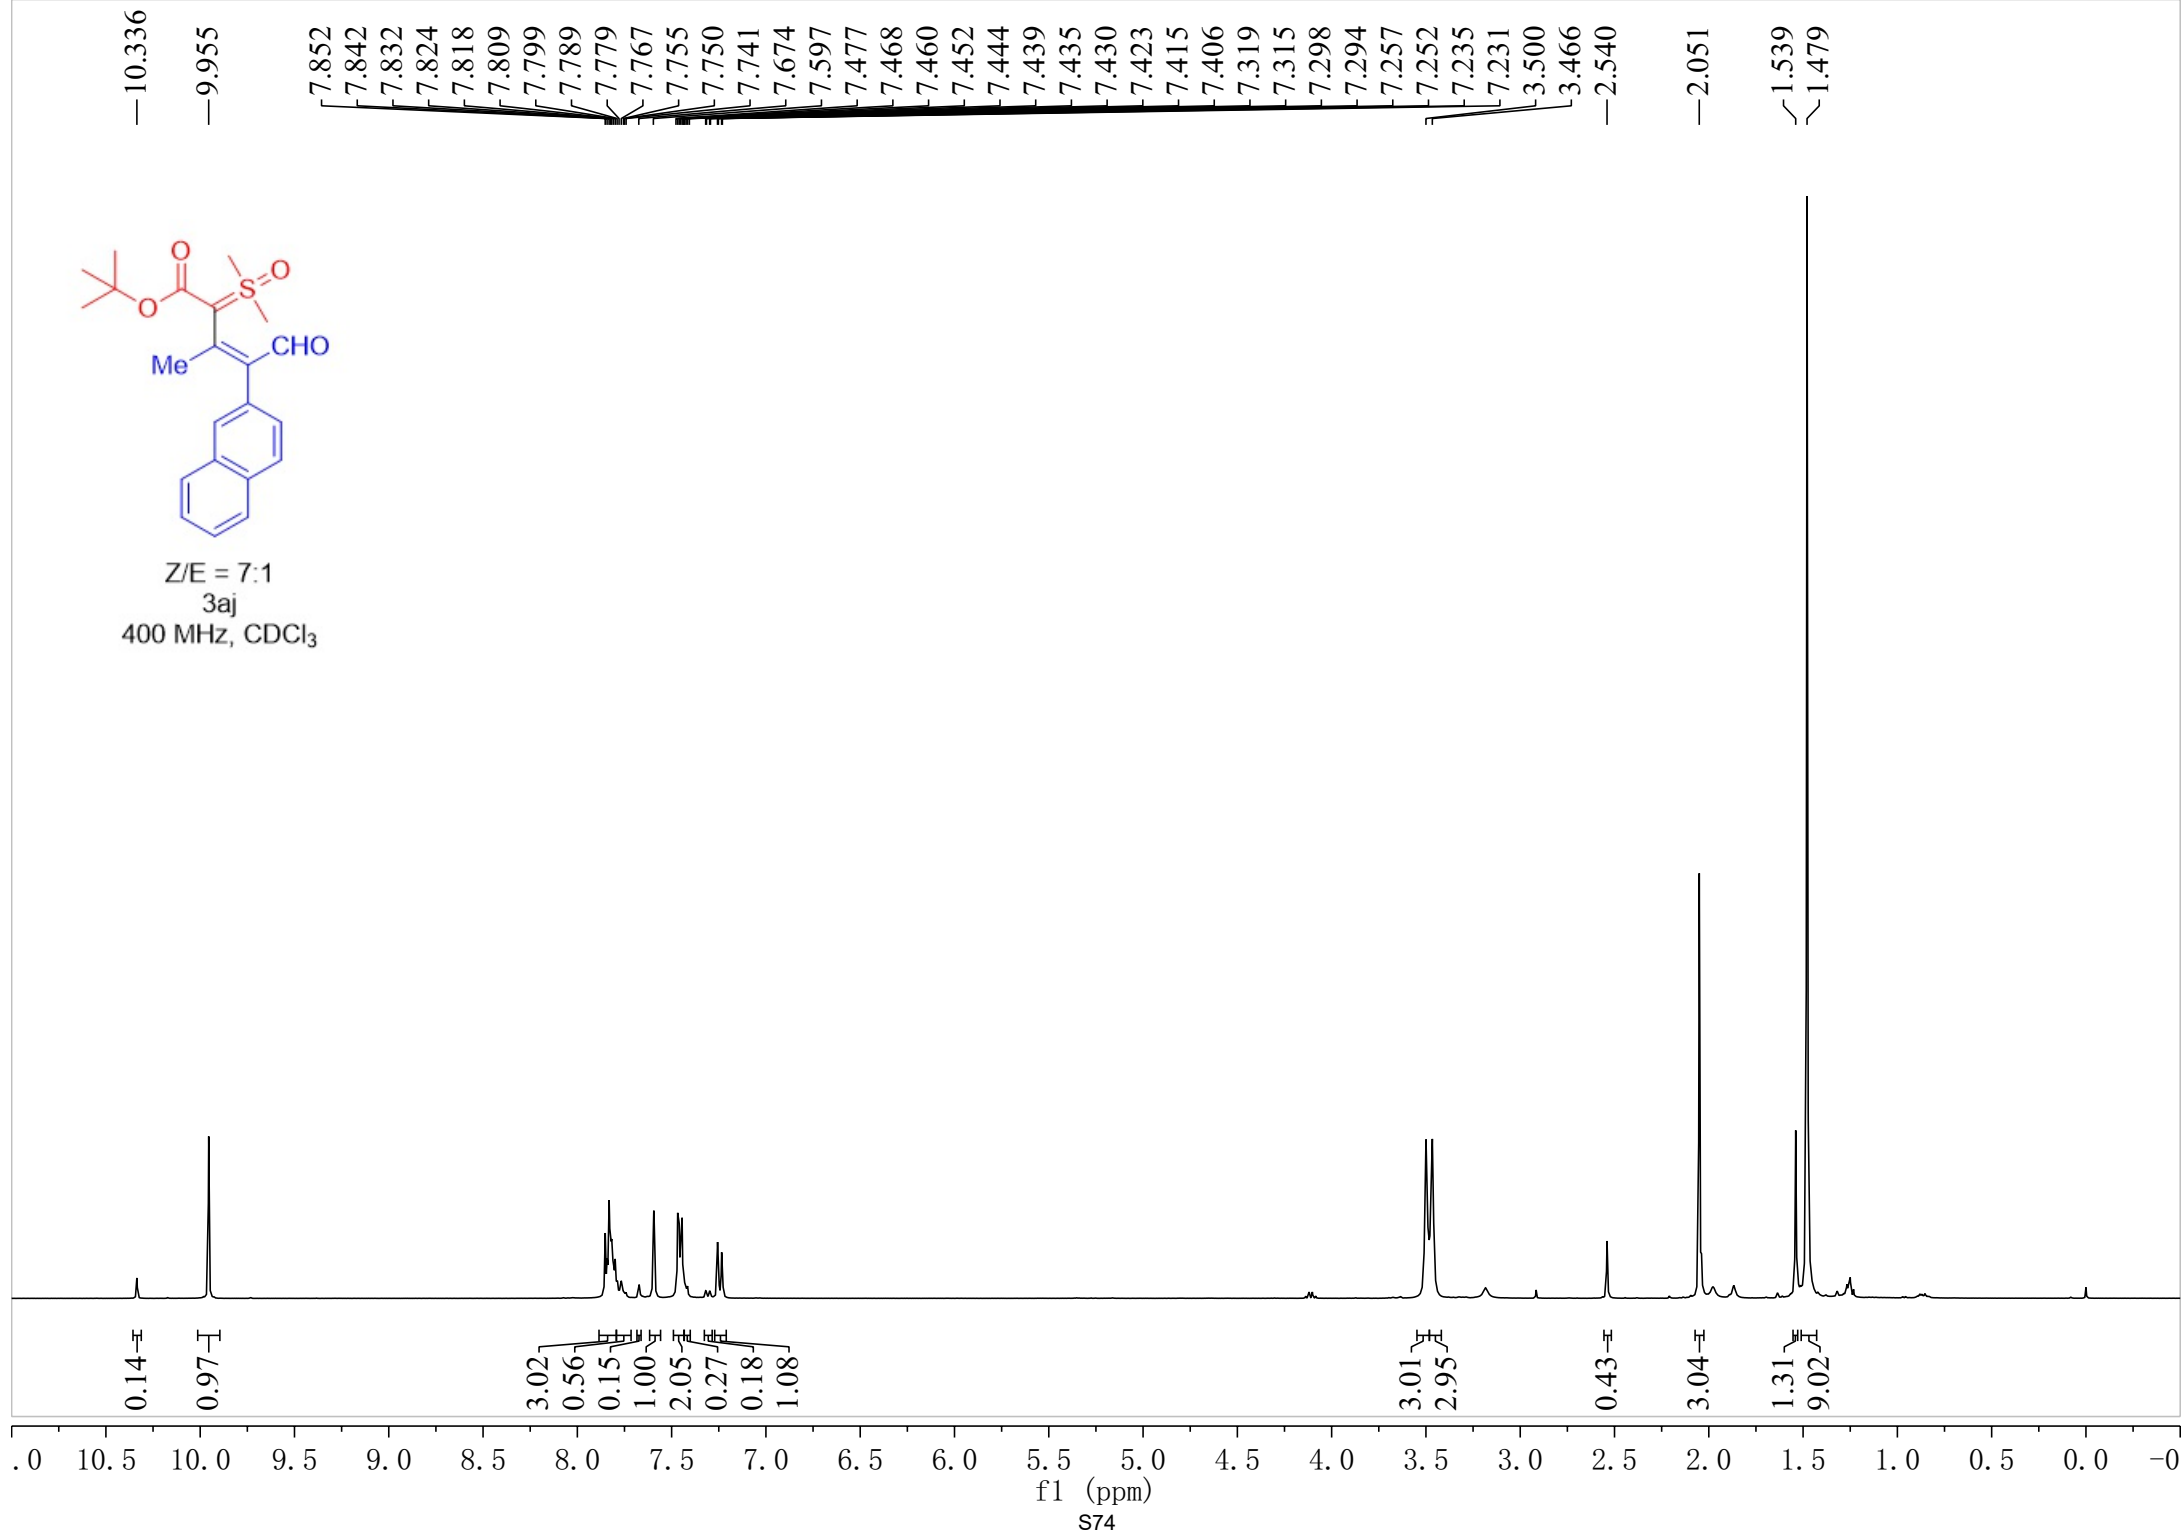

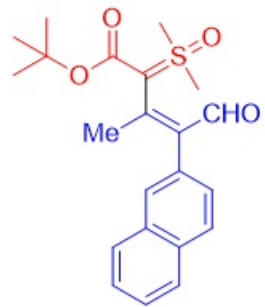

3aj  
101 MHz, CDCl<sub>3</sub>

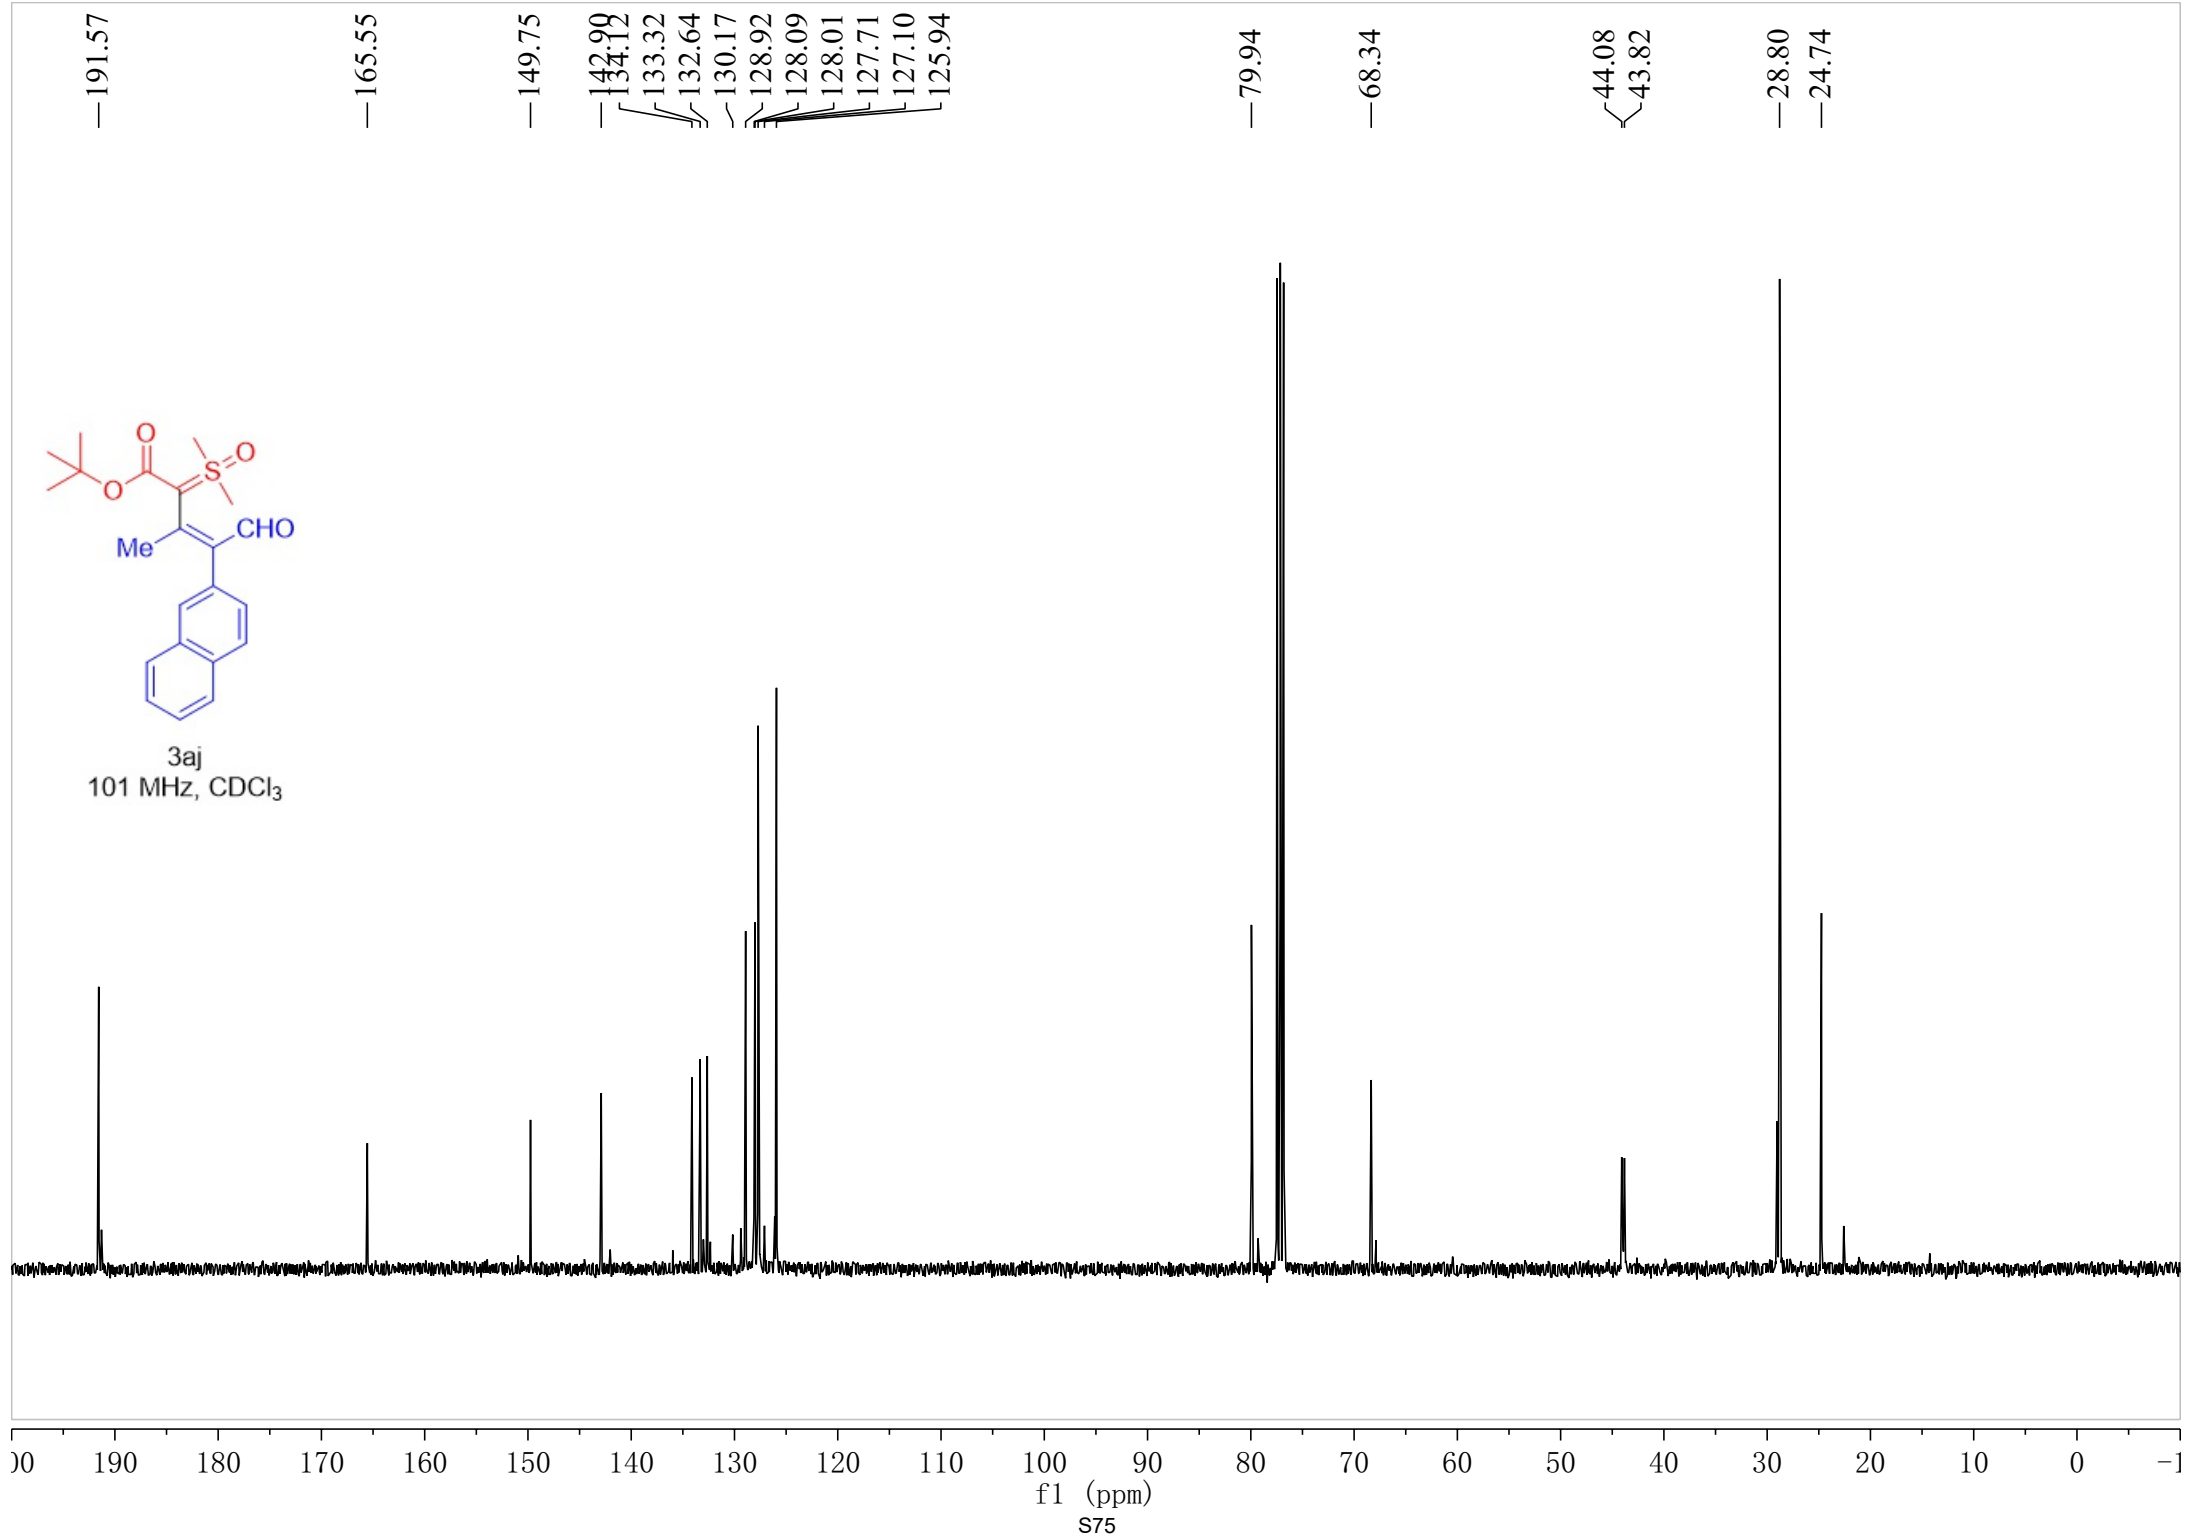

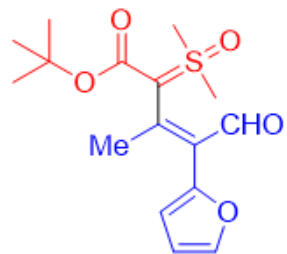

Z/E = 10:1  
 3ak  
 400 MHz, CDCl<sub>3</sub>

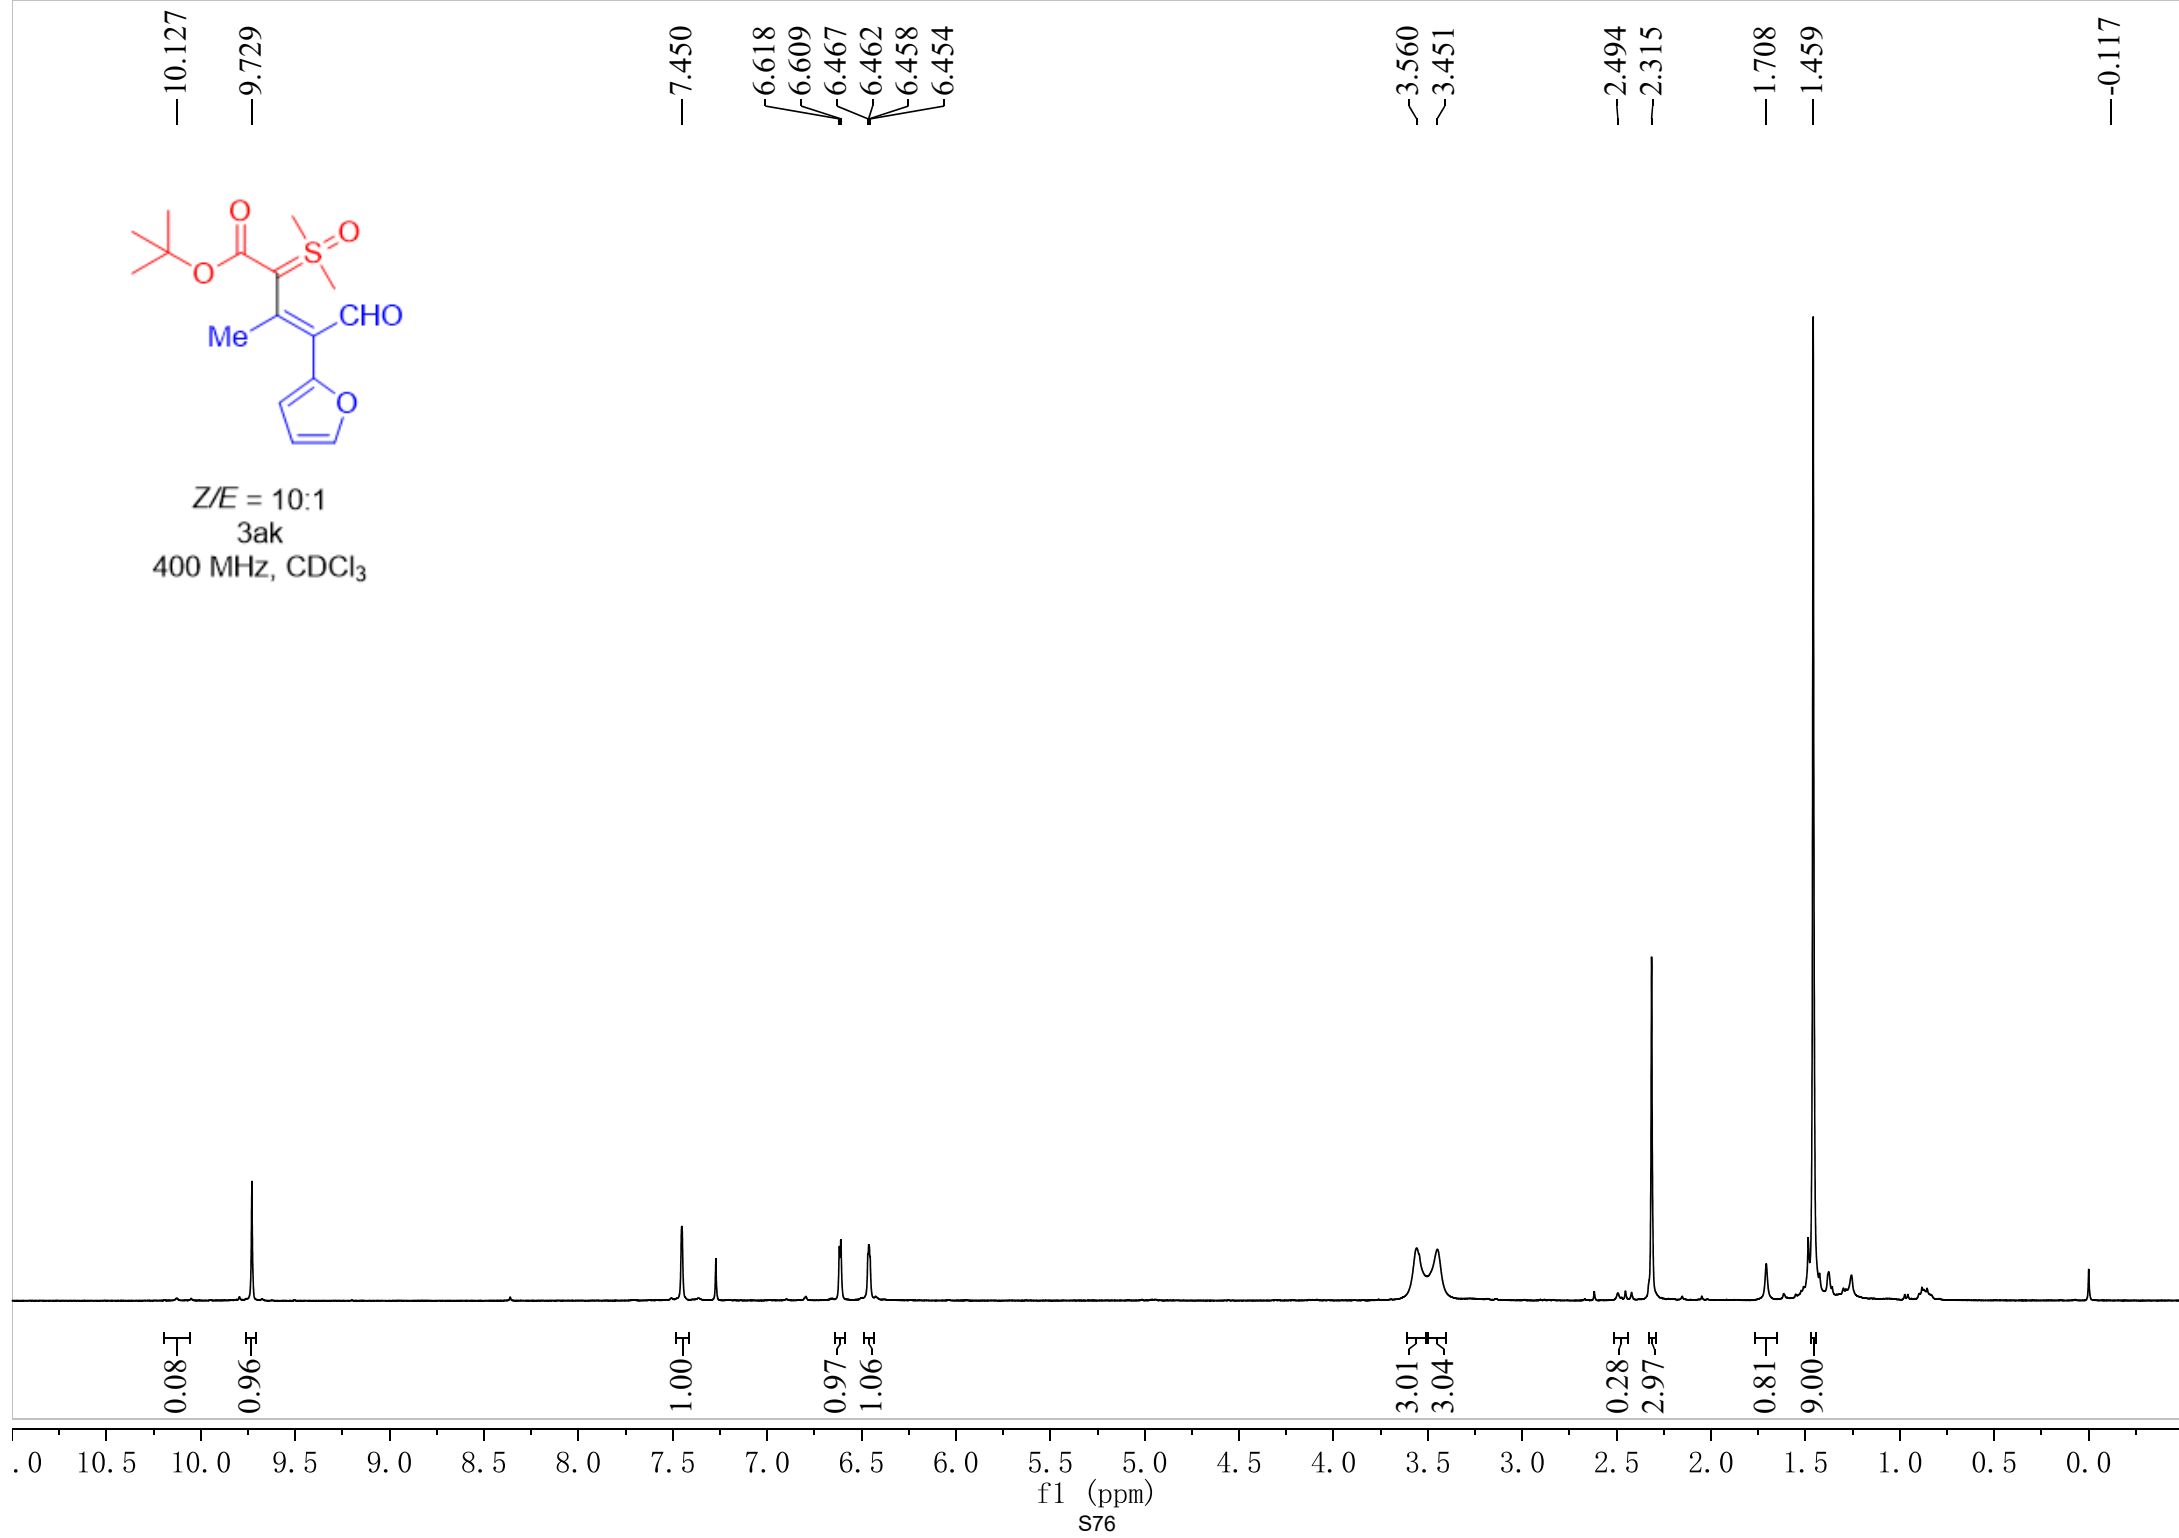

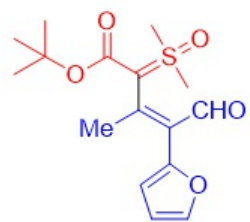

3ak  
101 MHz, CDCl<sub>3</sub>

—189.567

—165.258

~150.484

~149.268

—141.652

—131.351

~111.257

~111.025

—80.251

—71.911

~43.994

~43.826

—28.706

—24.721

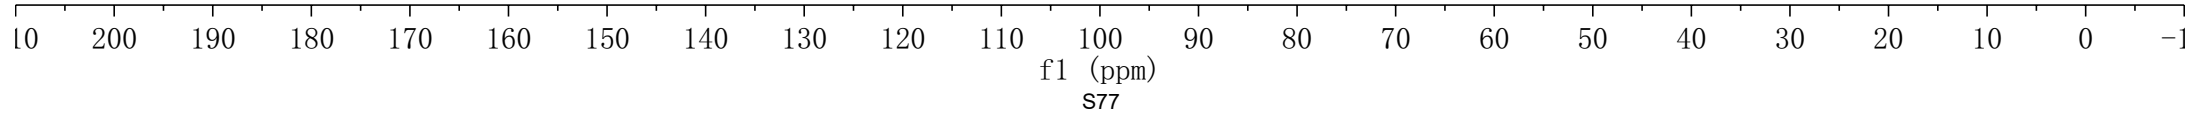

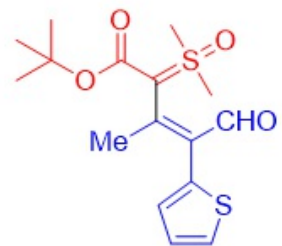

Z/E = 10:1  
3al  
400 MHz, CDCl<sub>3</sub>

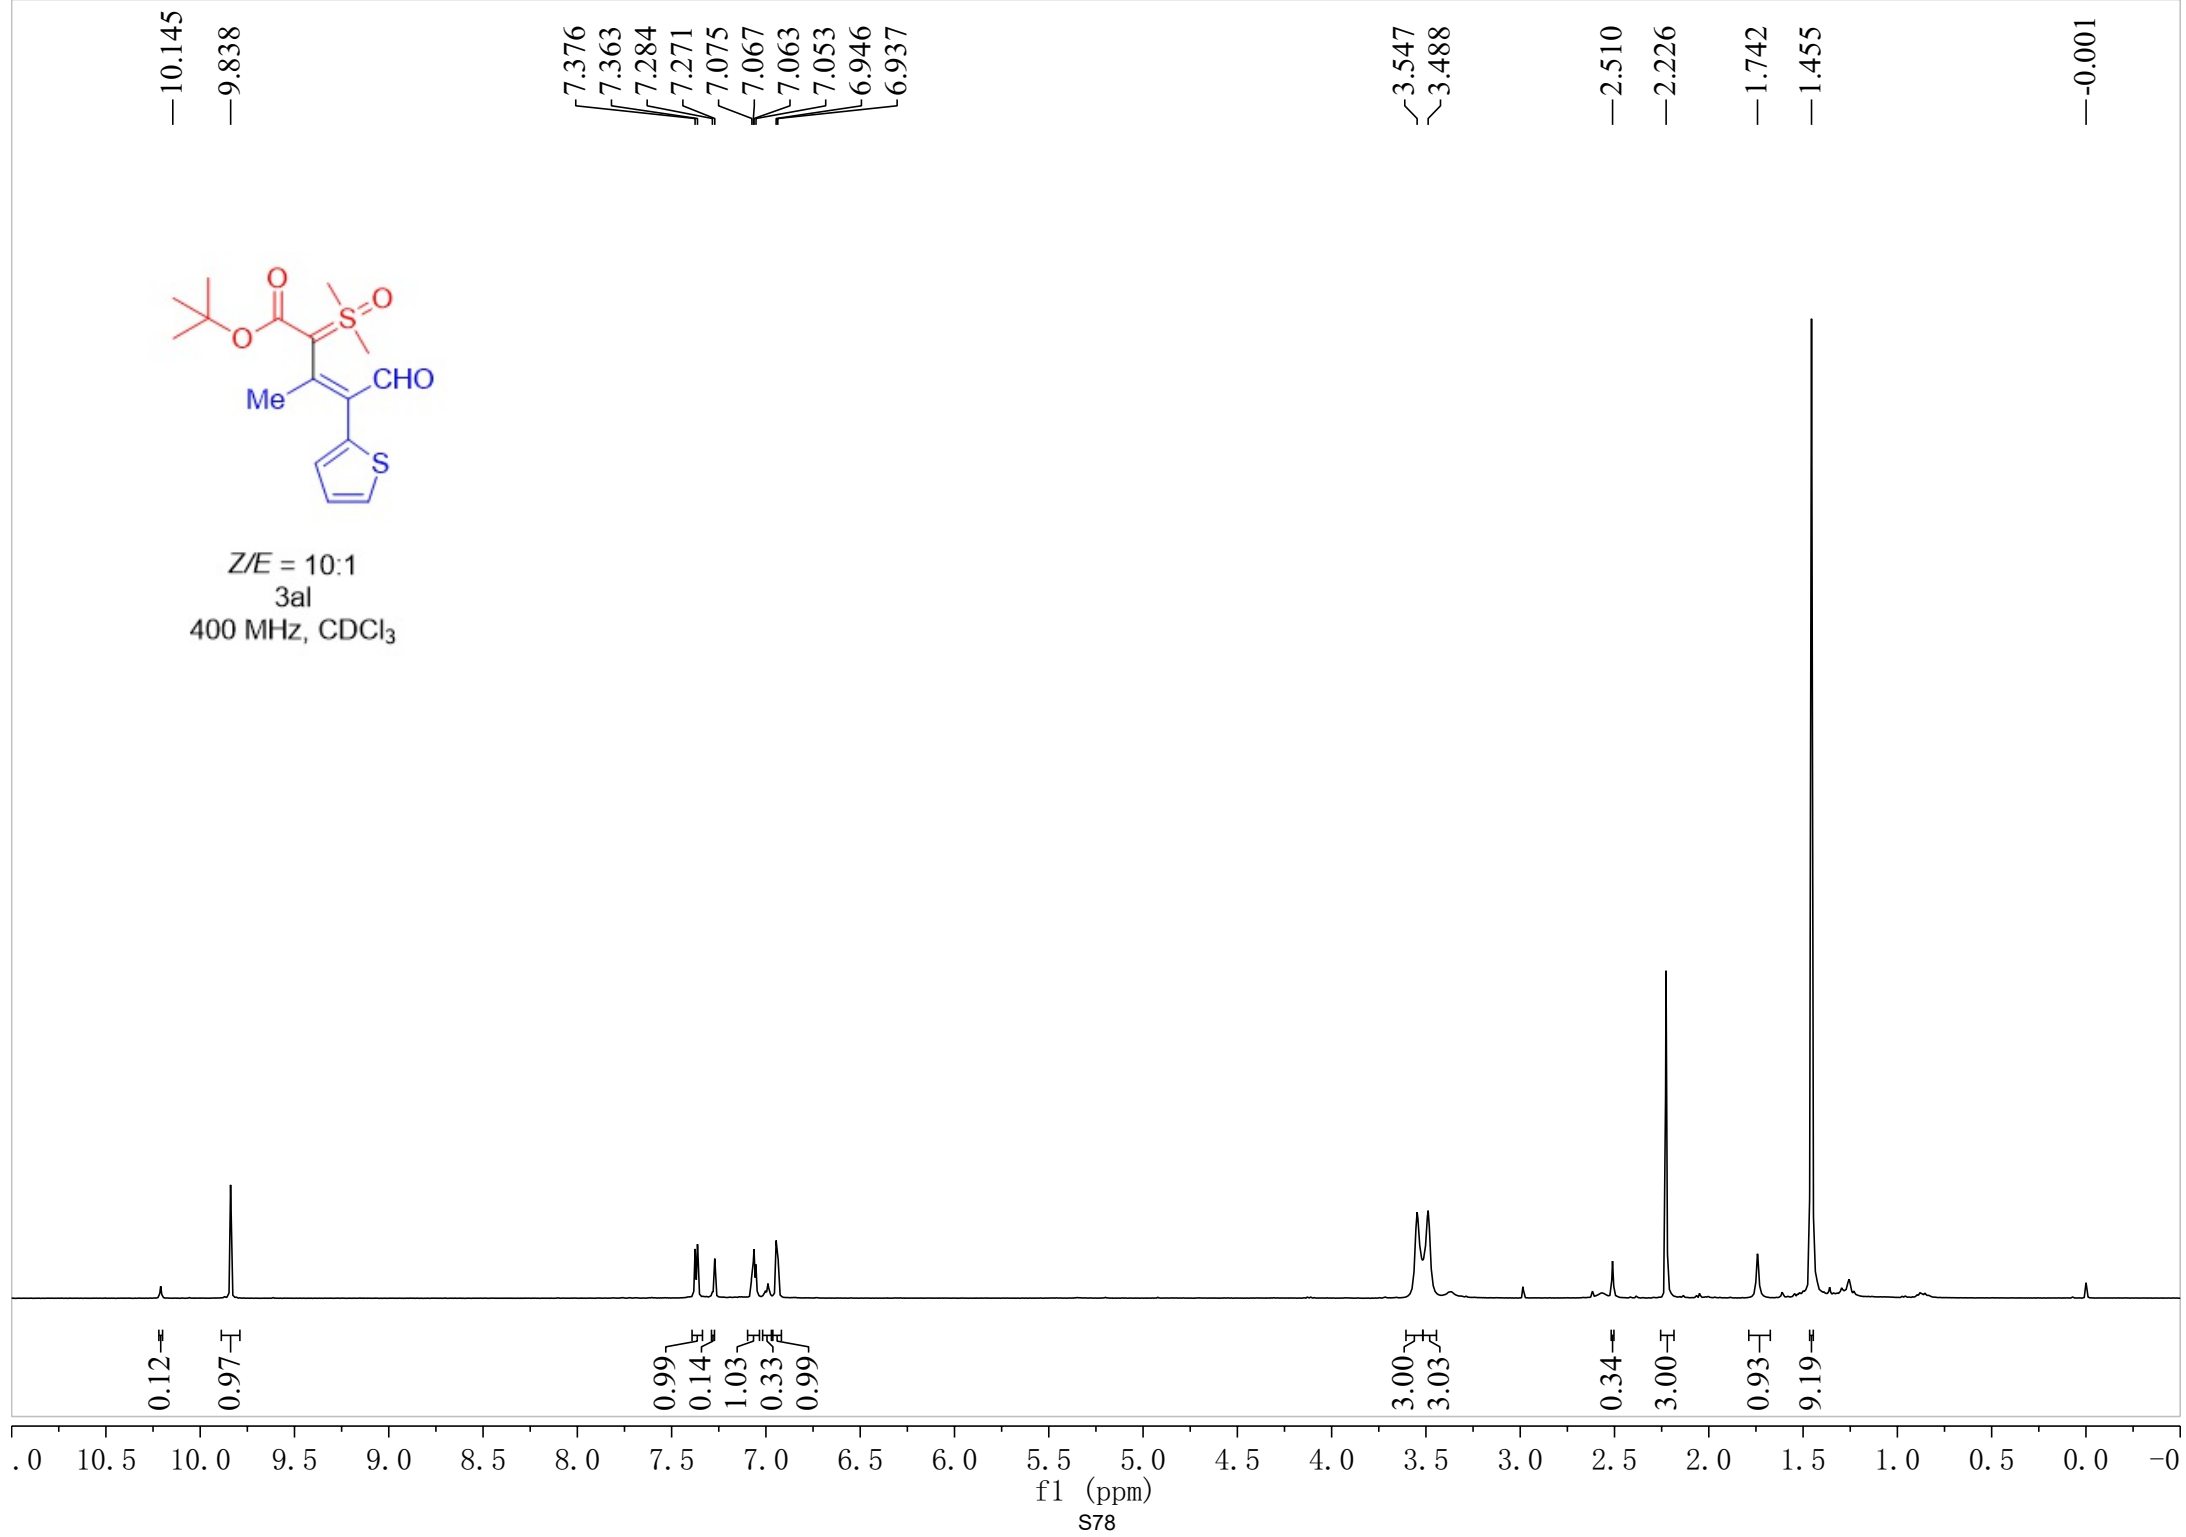

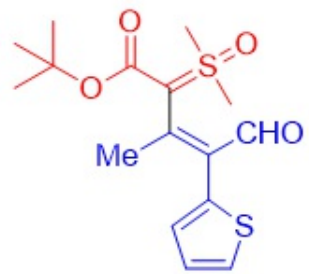

3al  
101 MHz, CDCl<sub>3</sub>

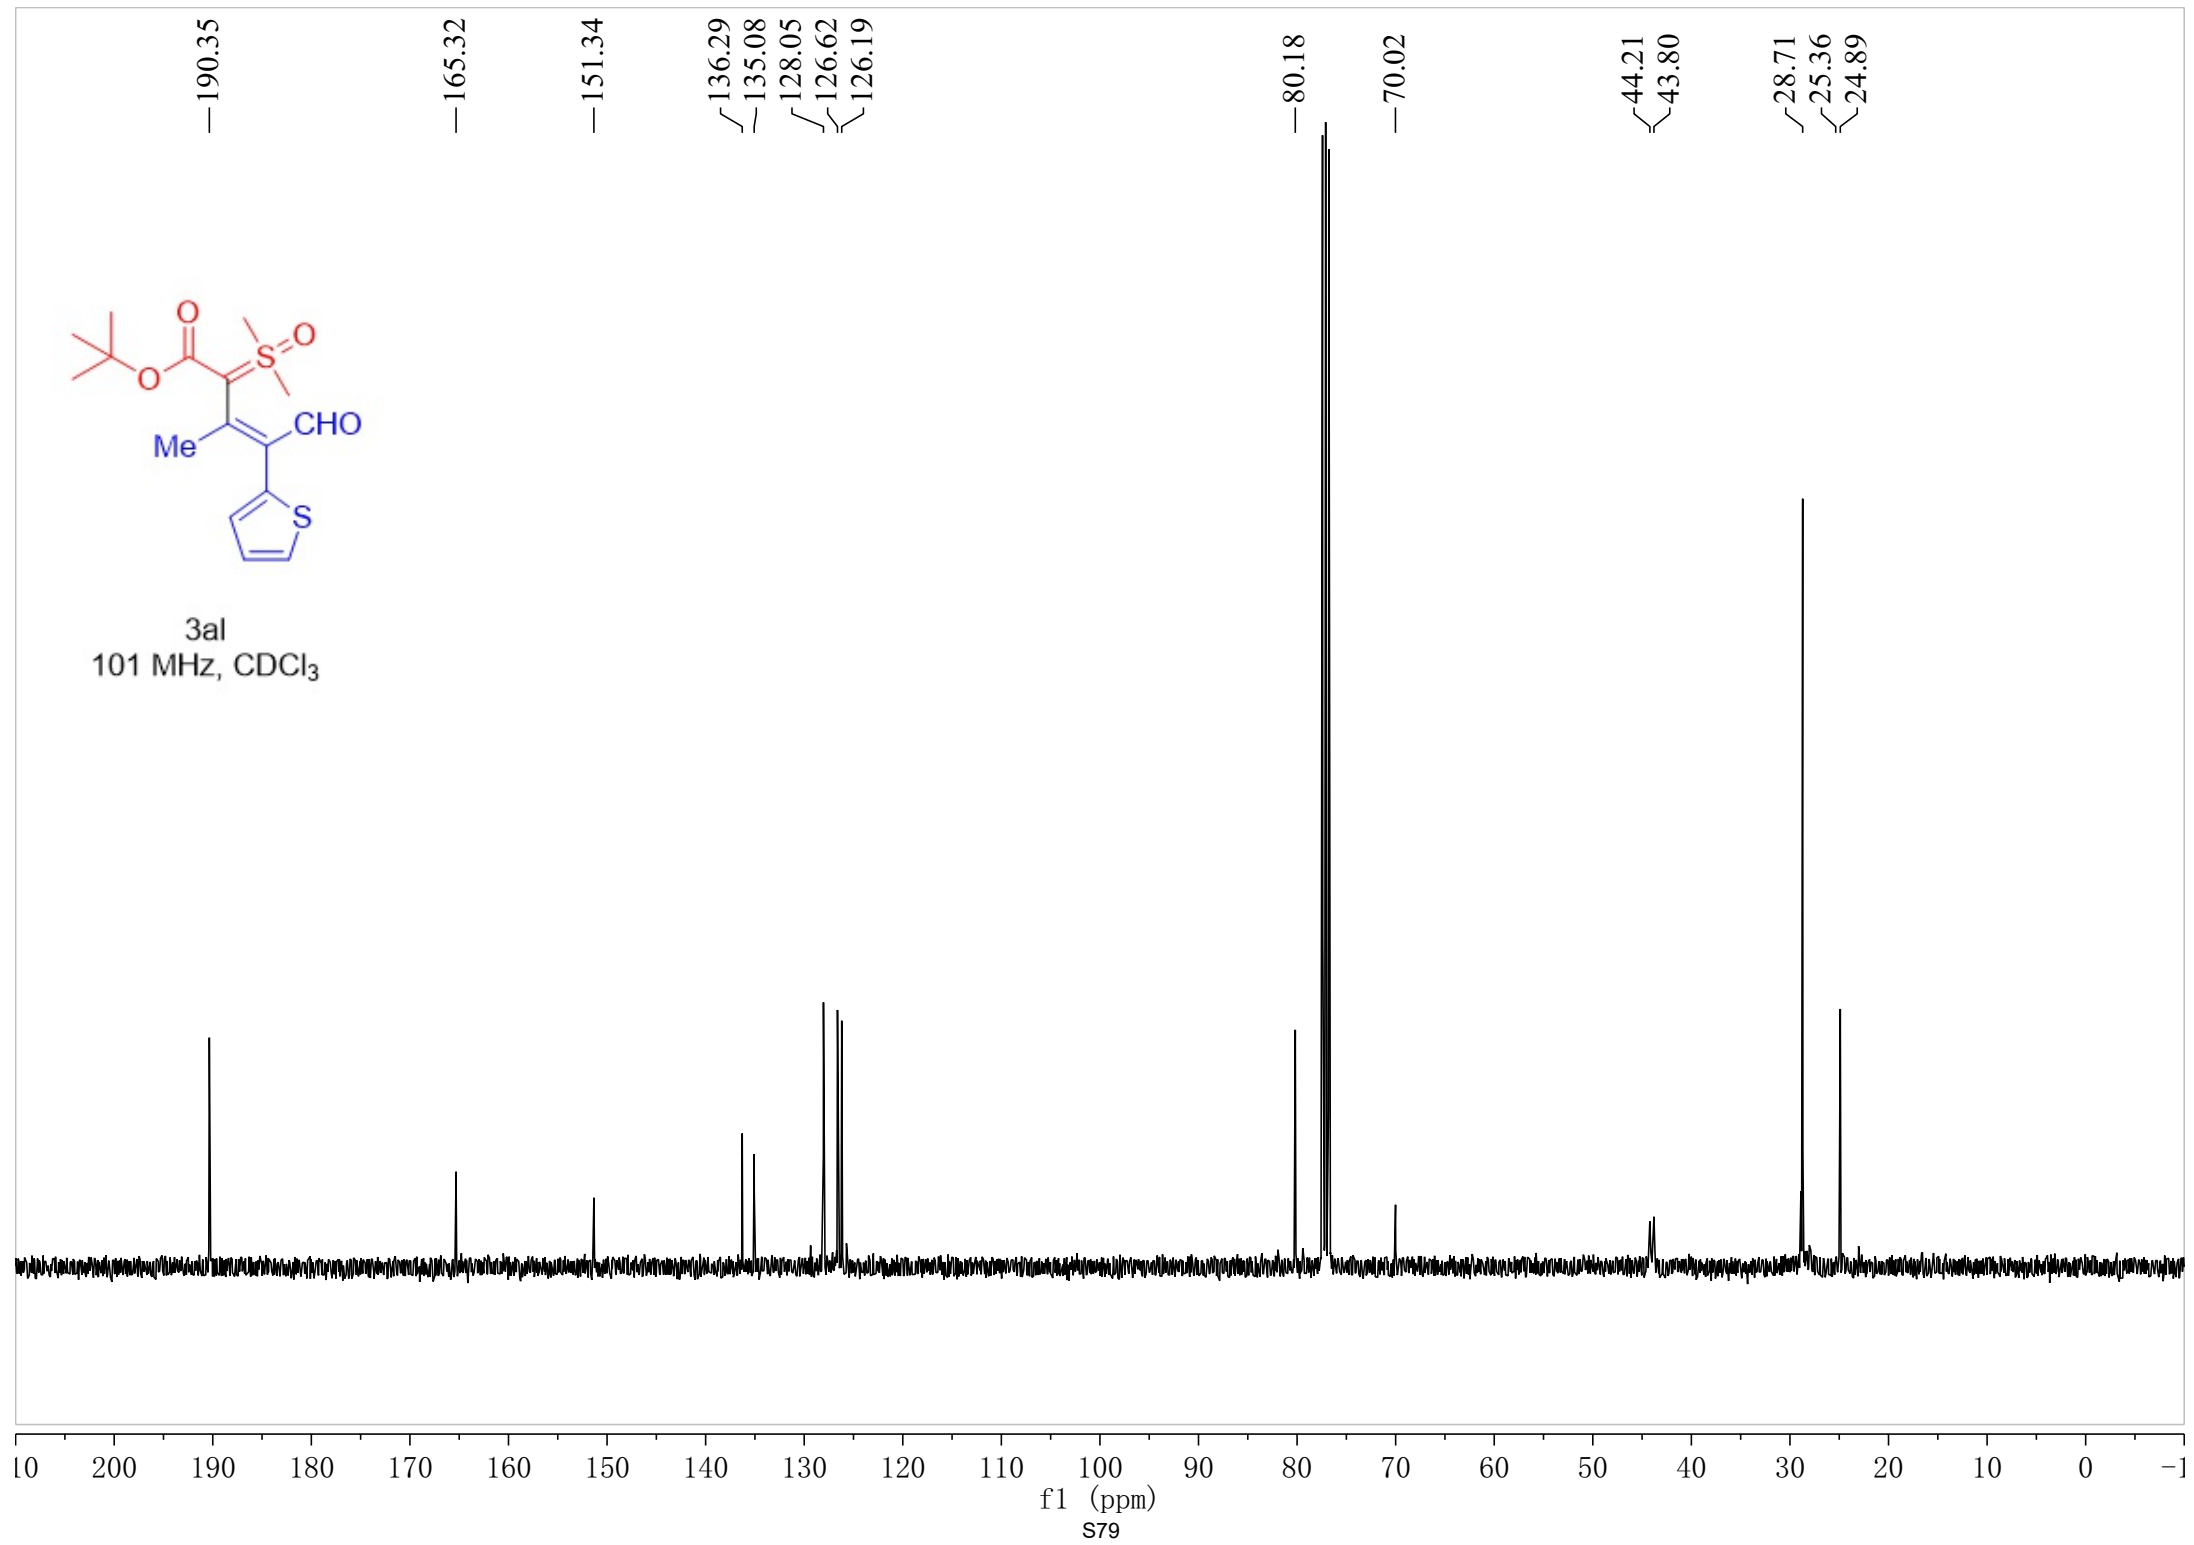

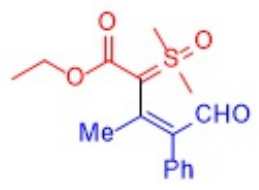

Z/E = 5:1  
3ba  
400 MHz, CDCl<sub>3</sub>

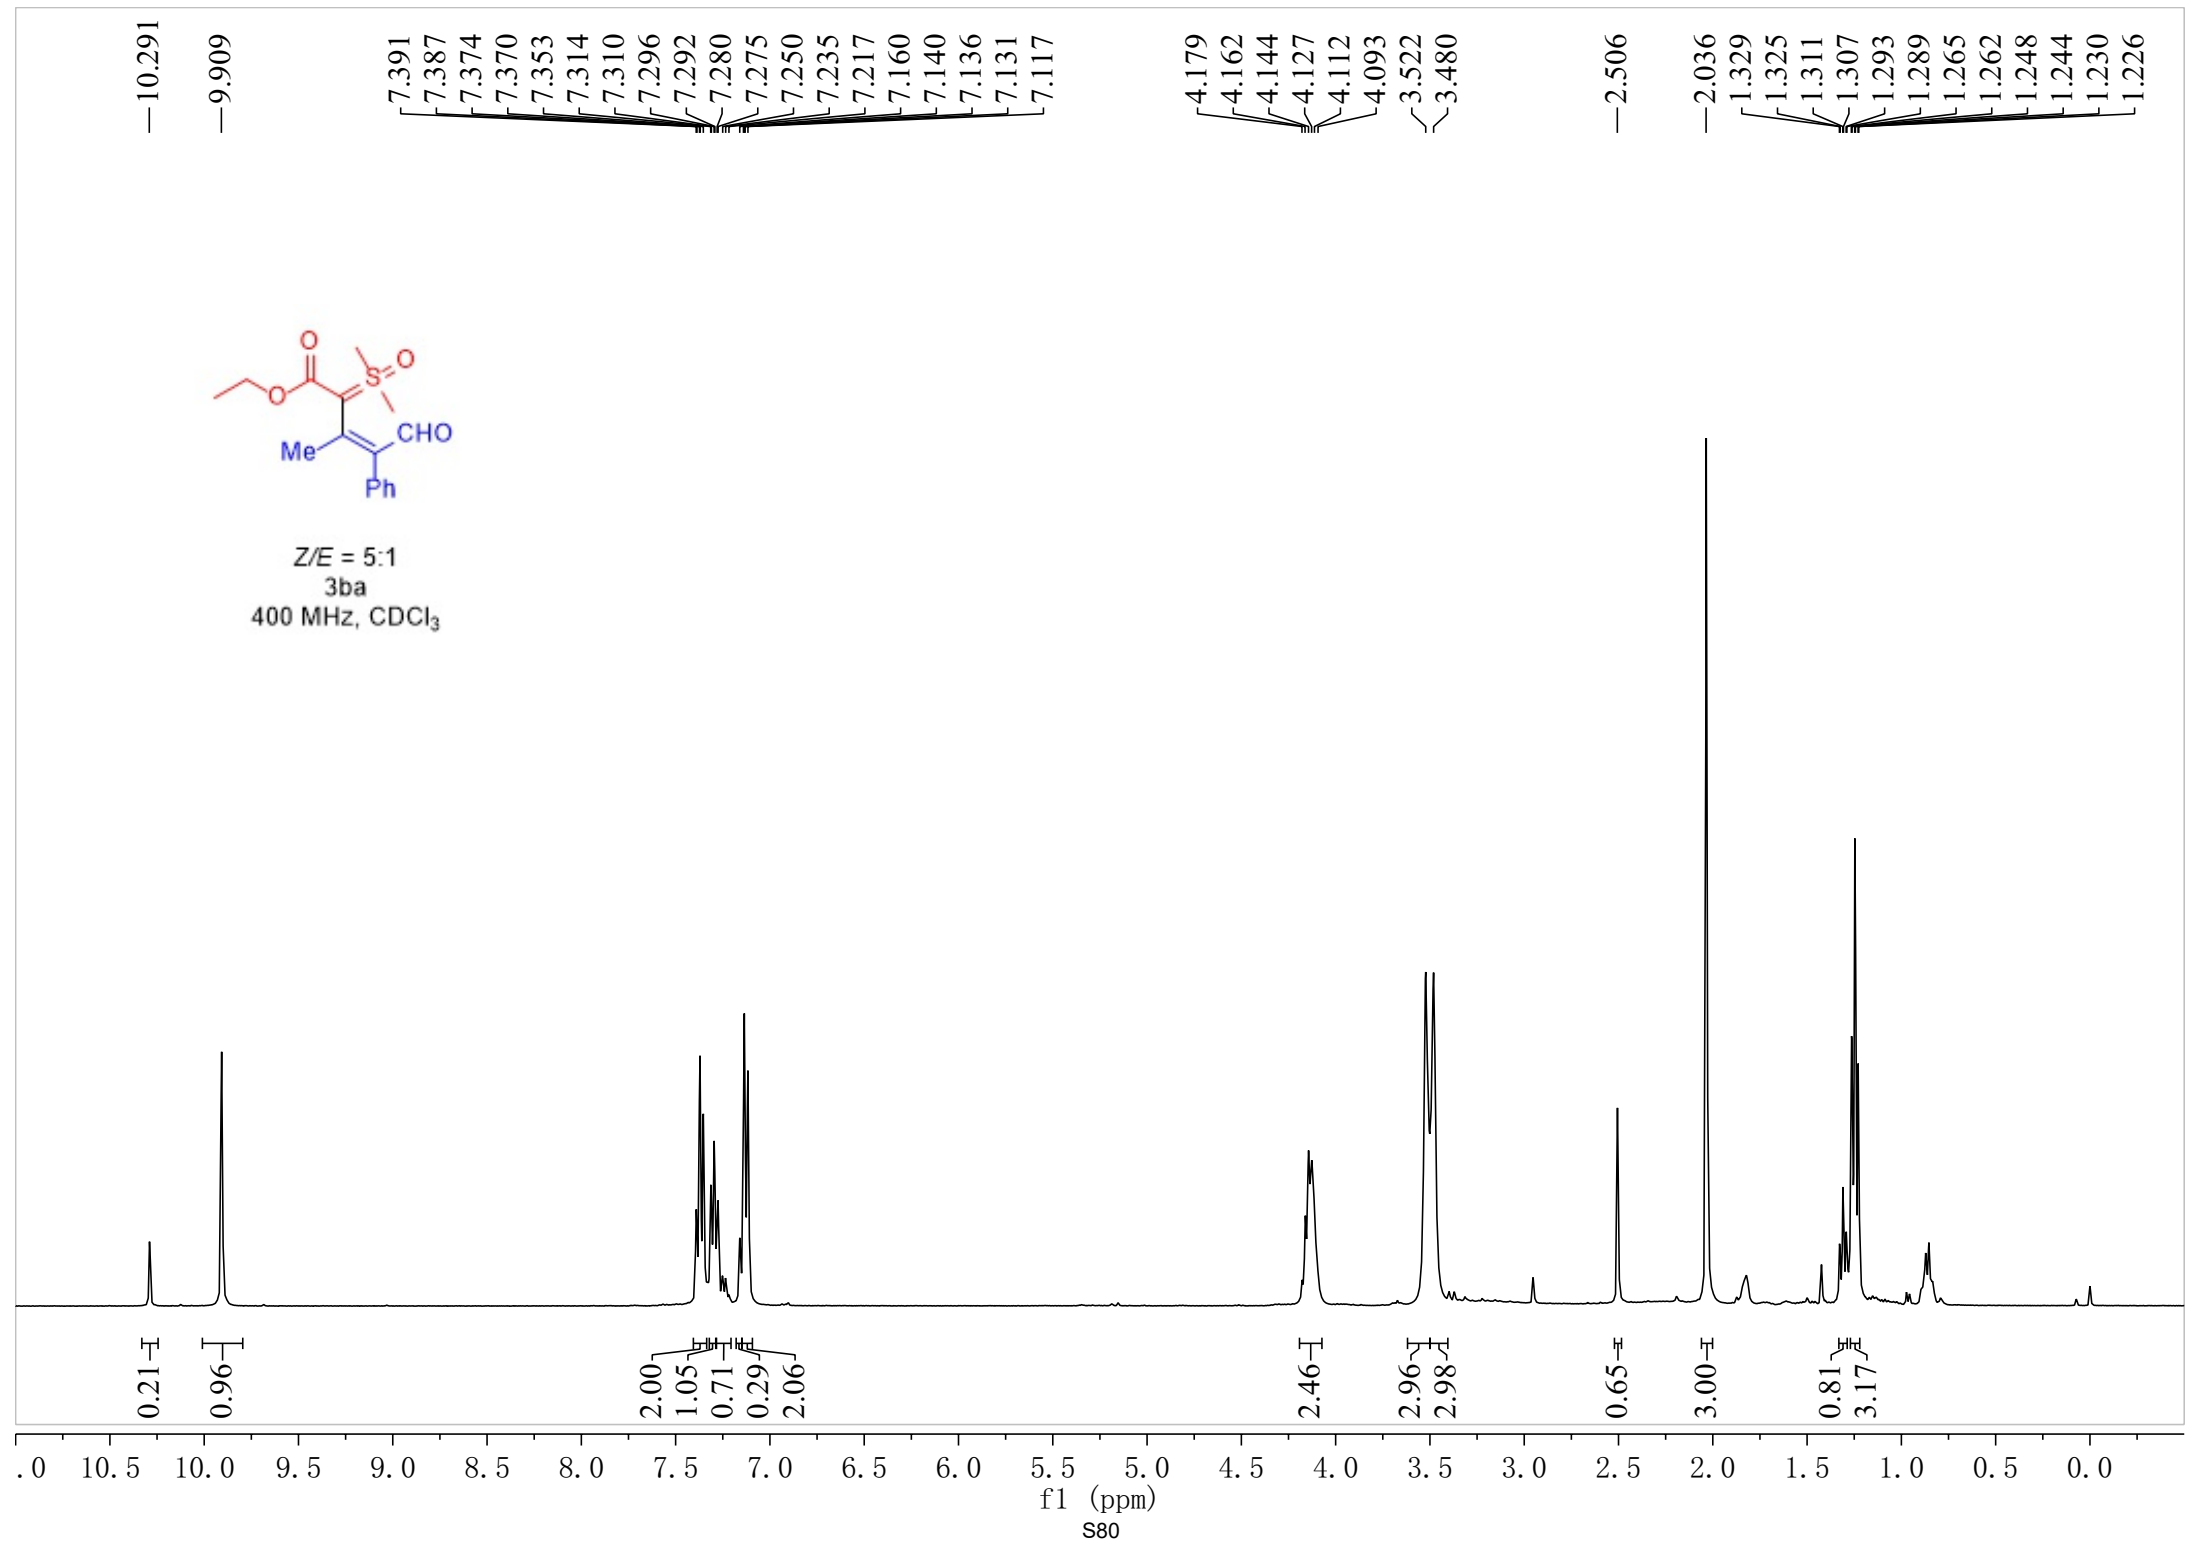

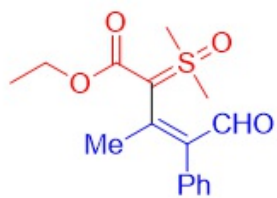

3ba  
101 MHz, CDCl<sub>3</sub>

—191.35  
—165.58  
~148.53  
—143.64  
/ 136.31  
/ 129.92  
/ 128.17  
/ 127.35

—67.22  
—59.43  
—43.73  
—24.59  
—14.59

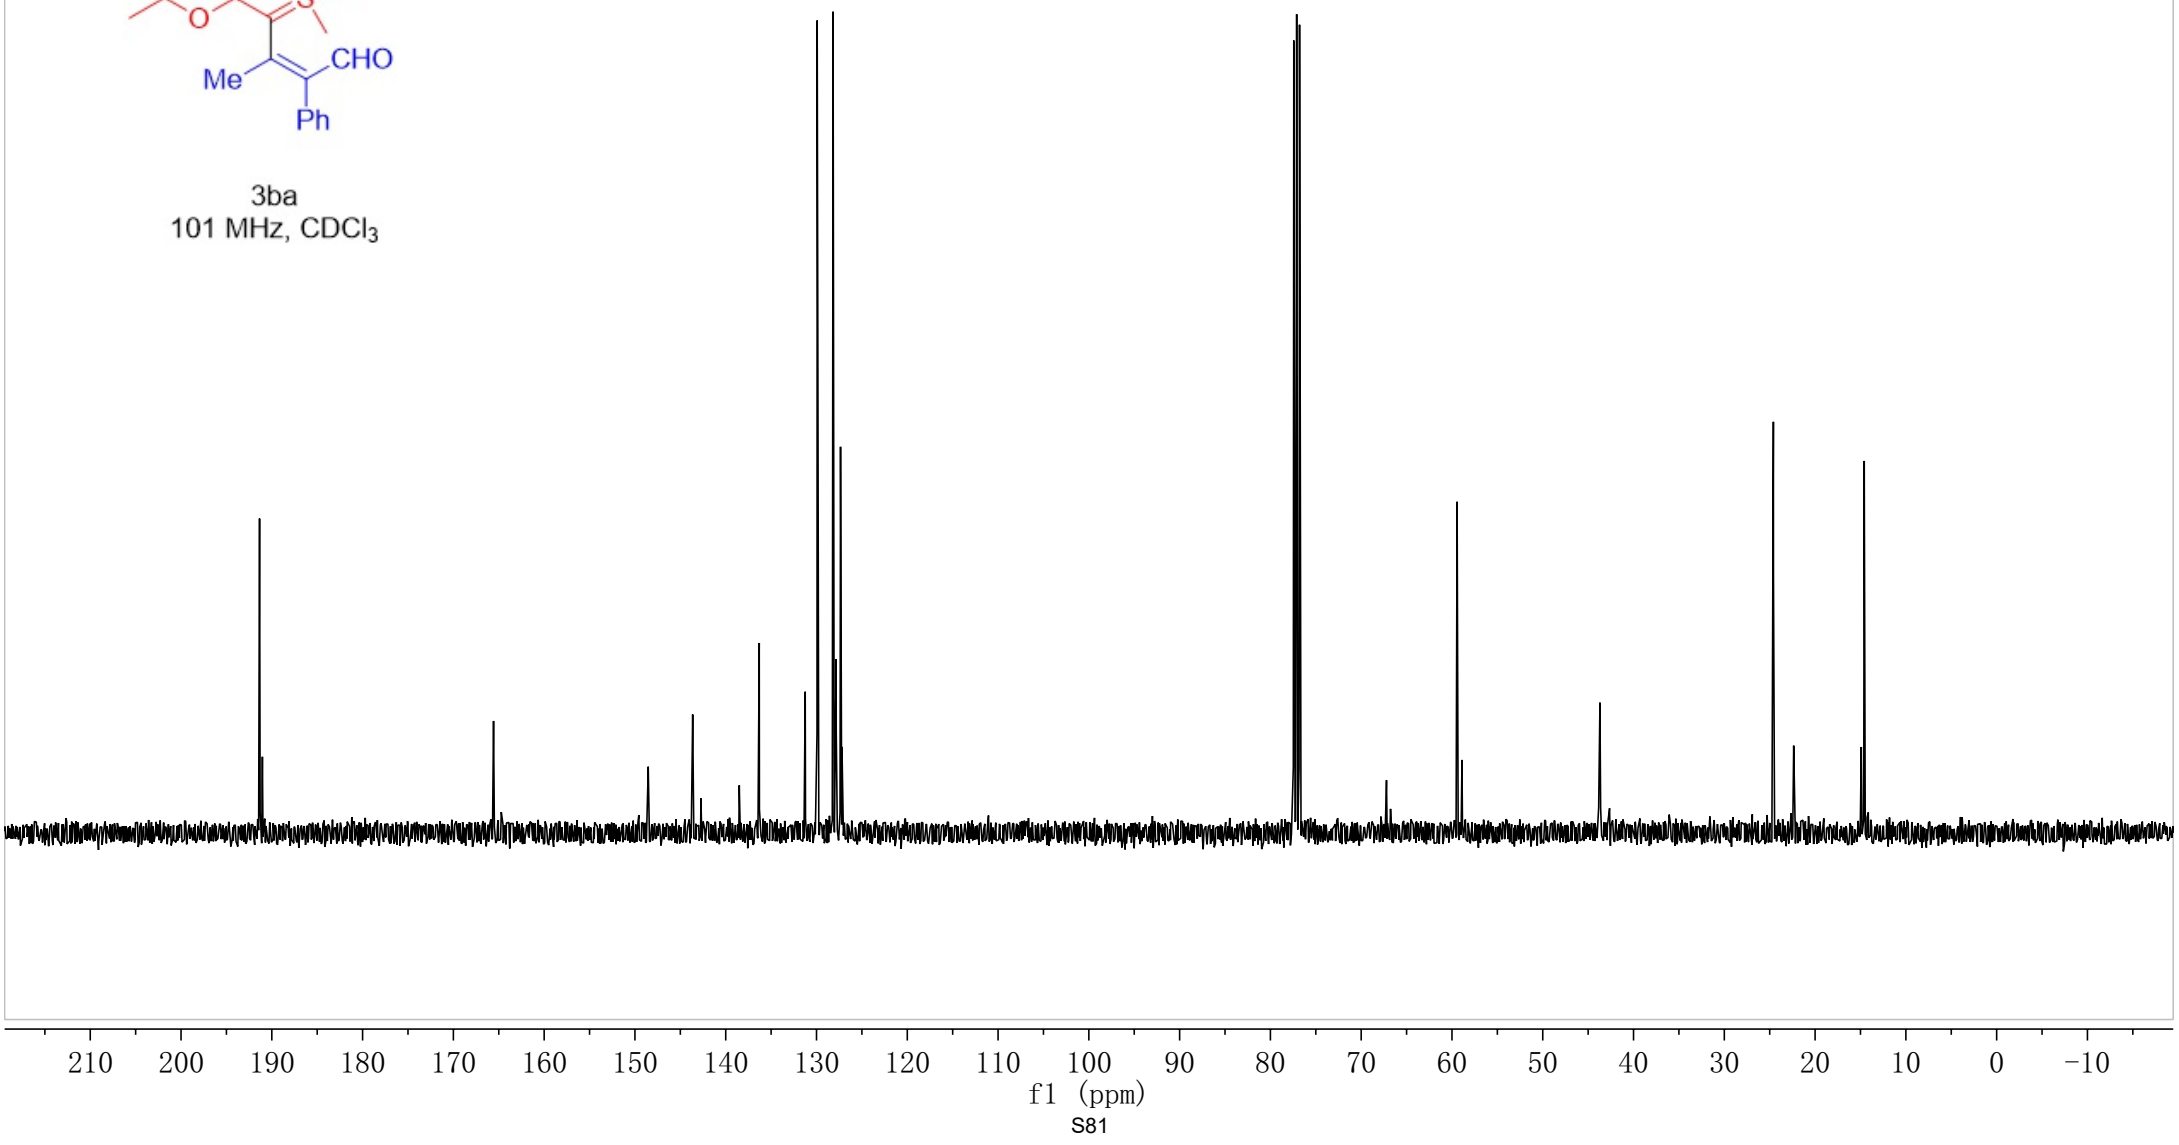

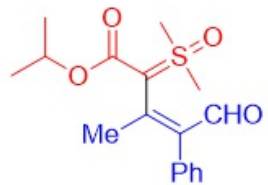

3ca  
101 MHz, CDCl<sub>3</sub>

—191.40  
—165.28  
—148.66  
—143.57  
~136.33  
/129.92  
/128.18  
~127.34  
{67.18  
{66.76  
—43.90  
~24.64  
~22.18

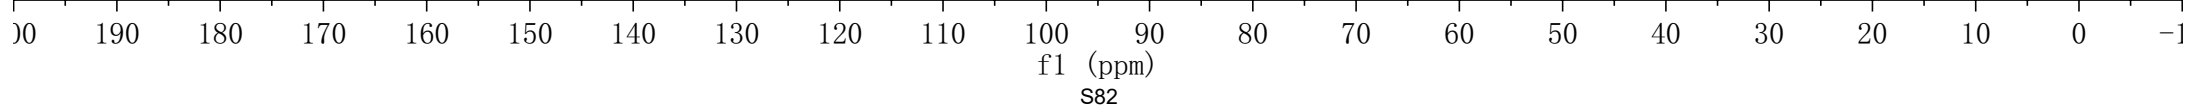

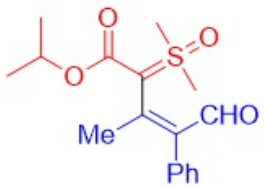

$Z/E = 4:1$   
3ca  
400 MHz, CDCl<sub>3</sub>

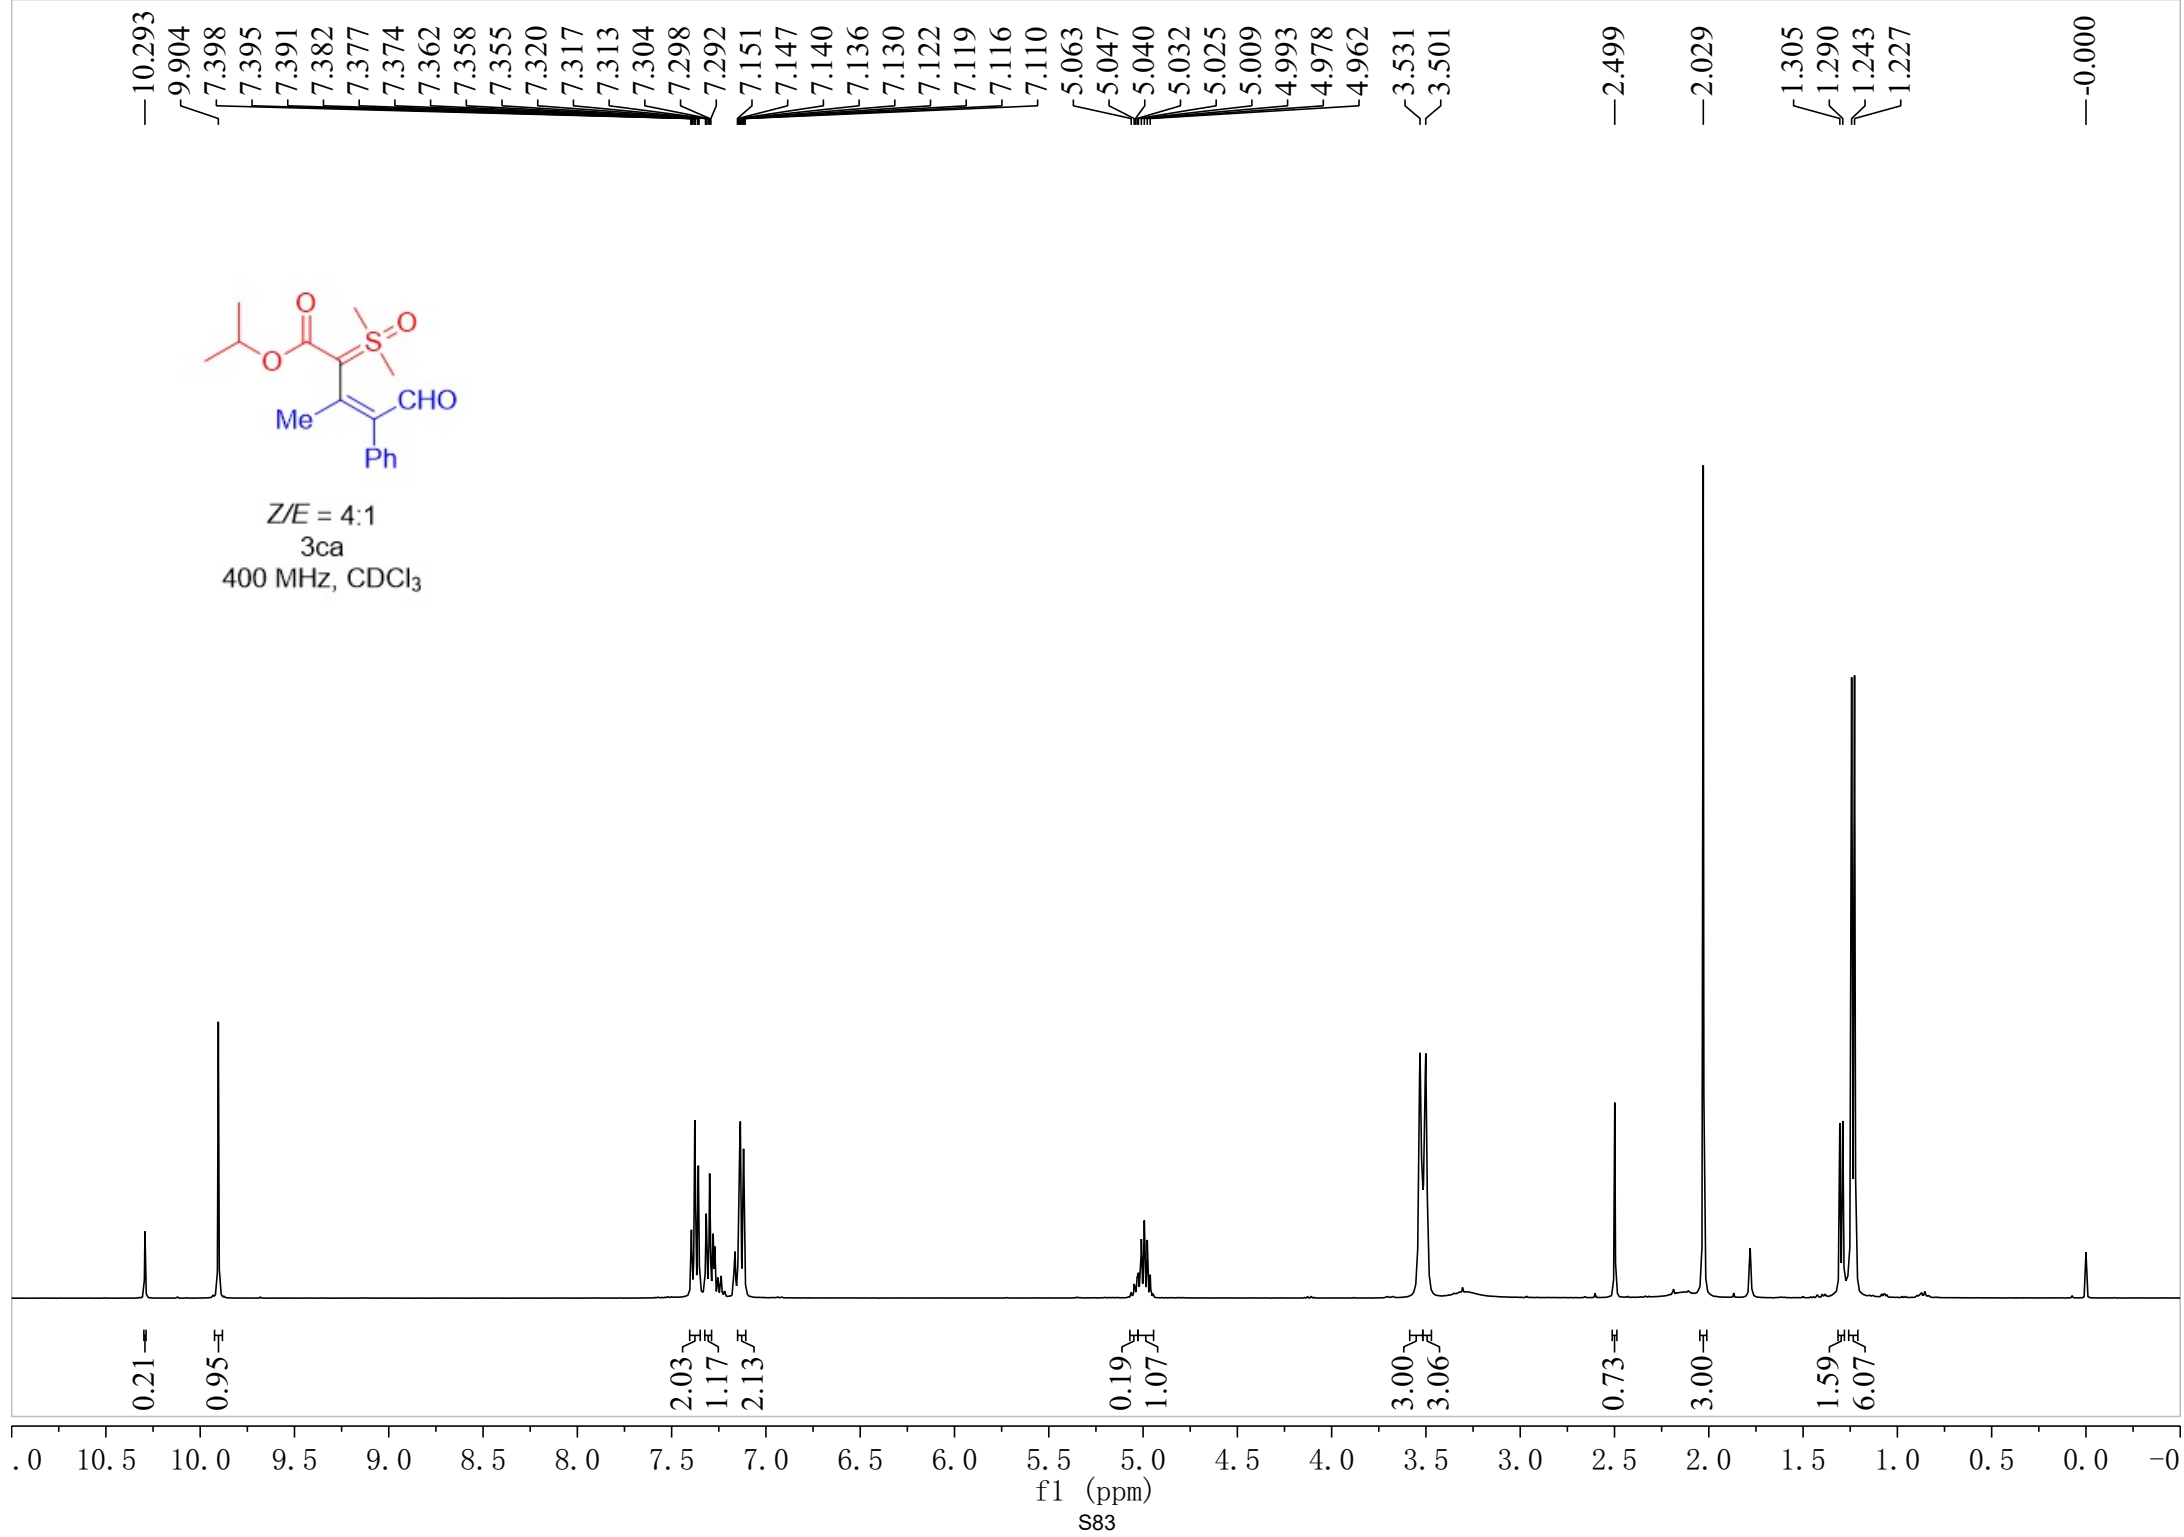

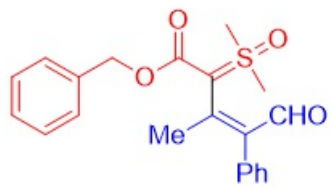

3da  
300 MHz, (CD<sub>3</sub>)<sub>2</sub>SO

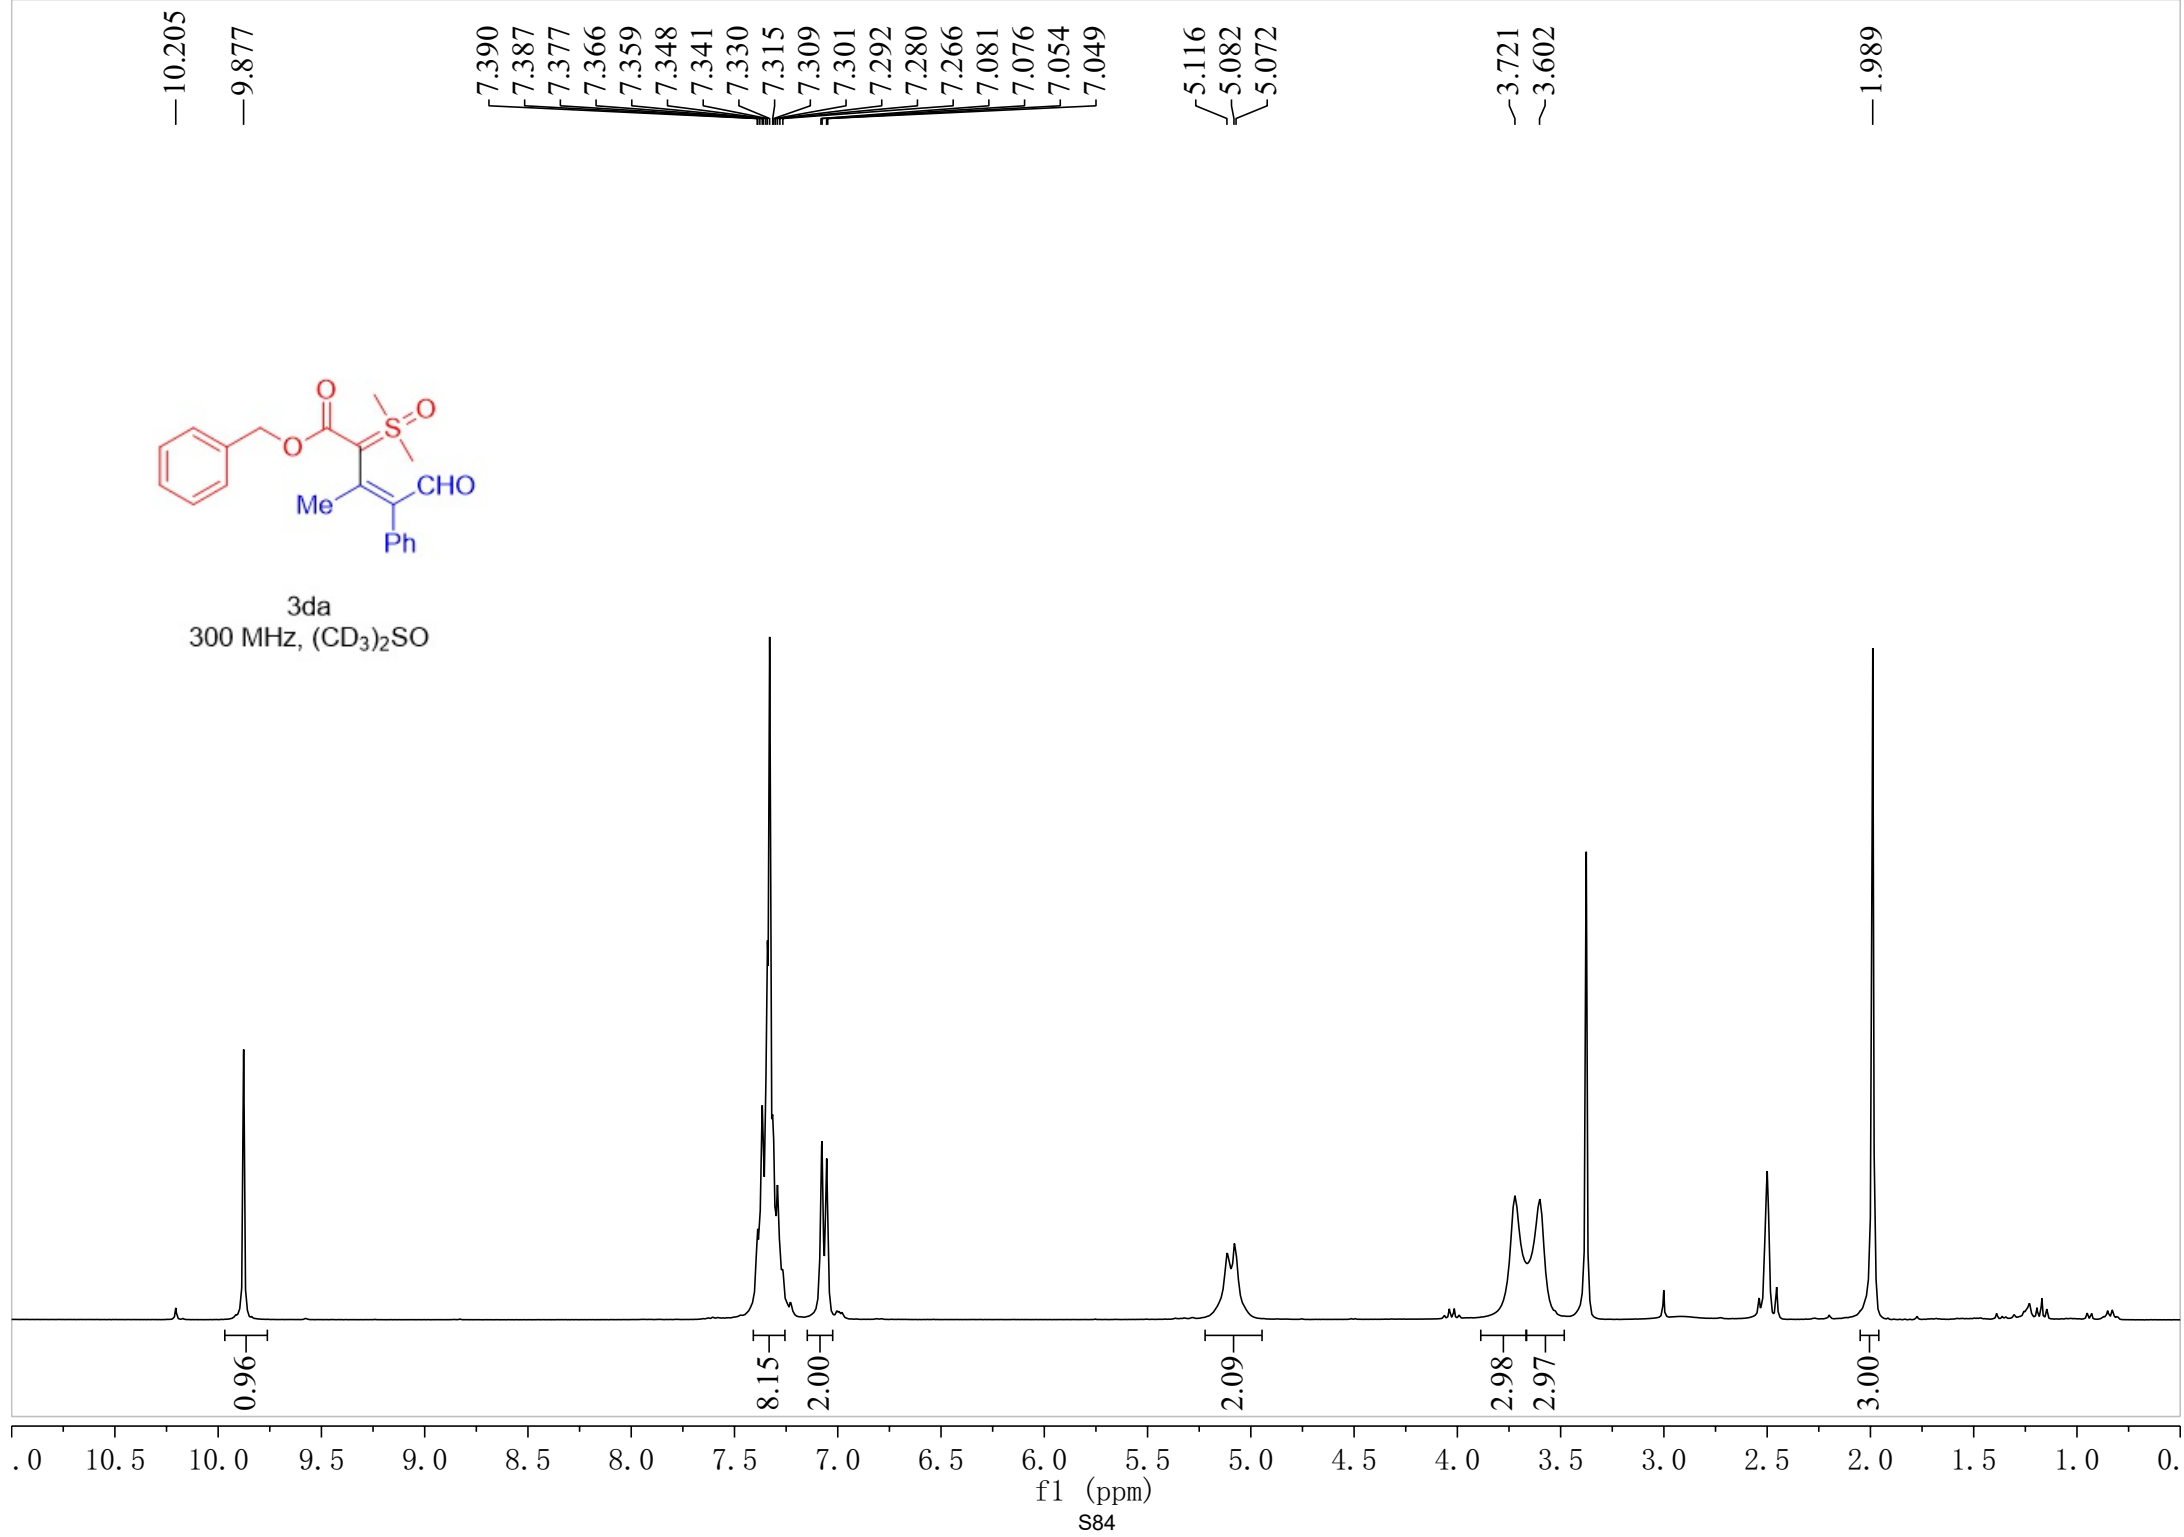

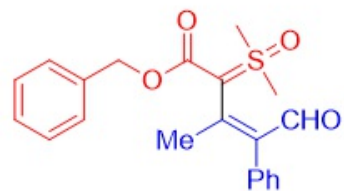

3da  
101MHz, CDCl<sub>3</sub>

—191.45  
—165.12  
—148.40  
—144.11  
—136.86  
—136.13  
—131.26  
—129.89  
—128.50  
—128.18  
—127.86  
—127.68  
—127.41  
—65.26  
—43.58  
—24.84

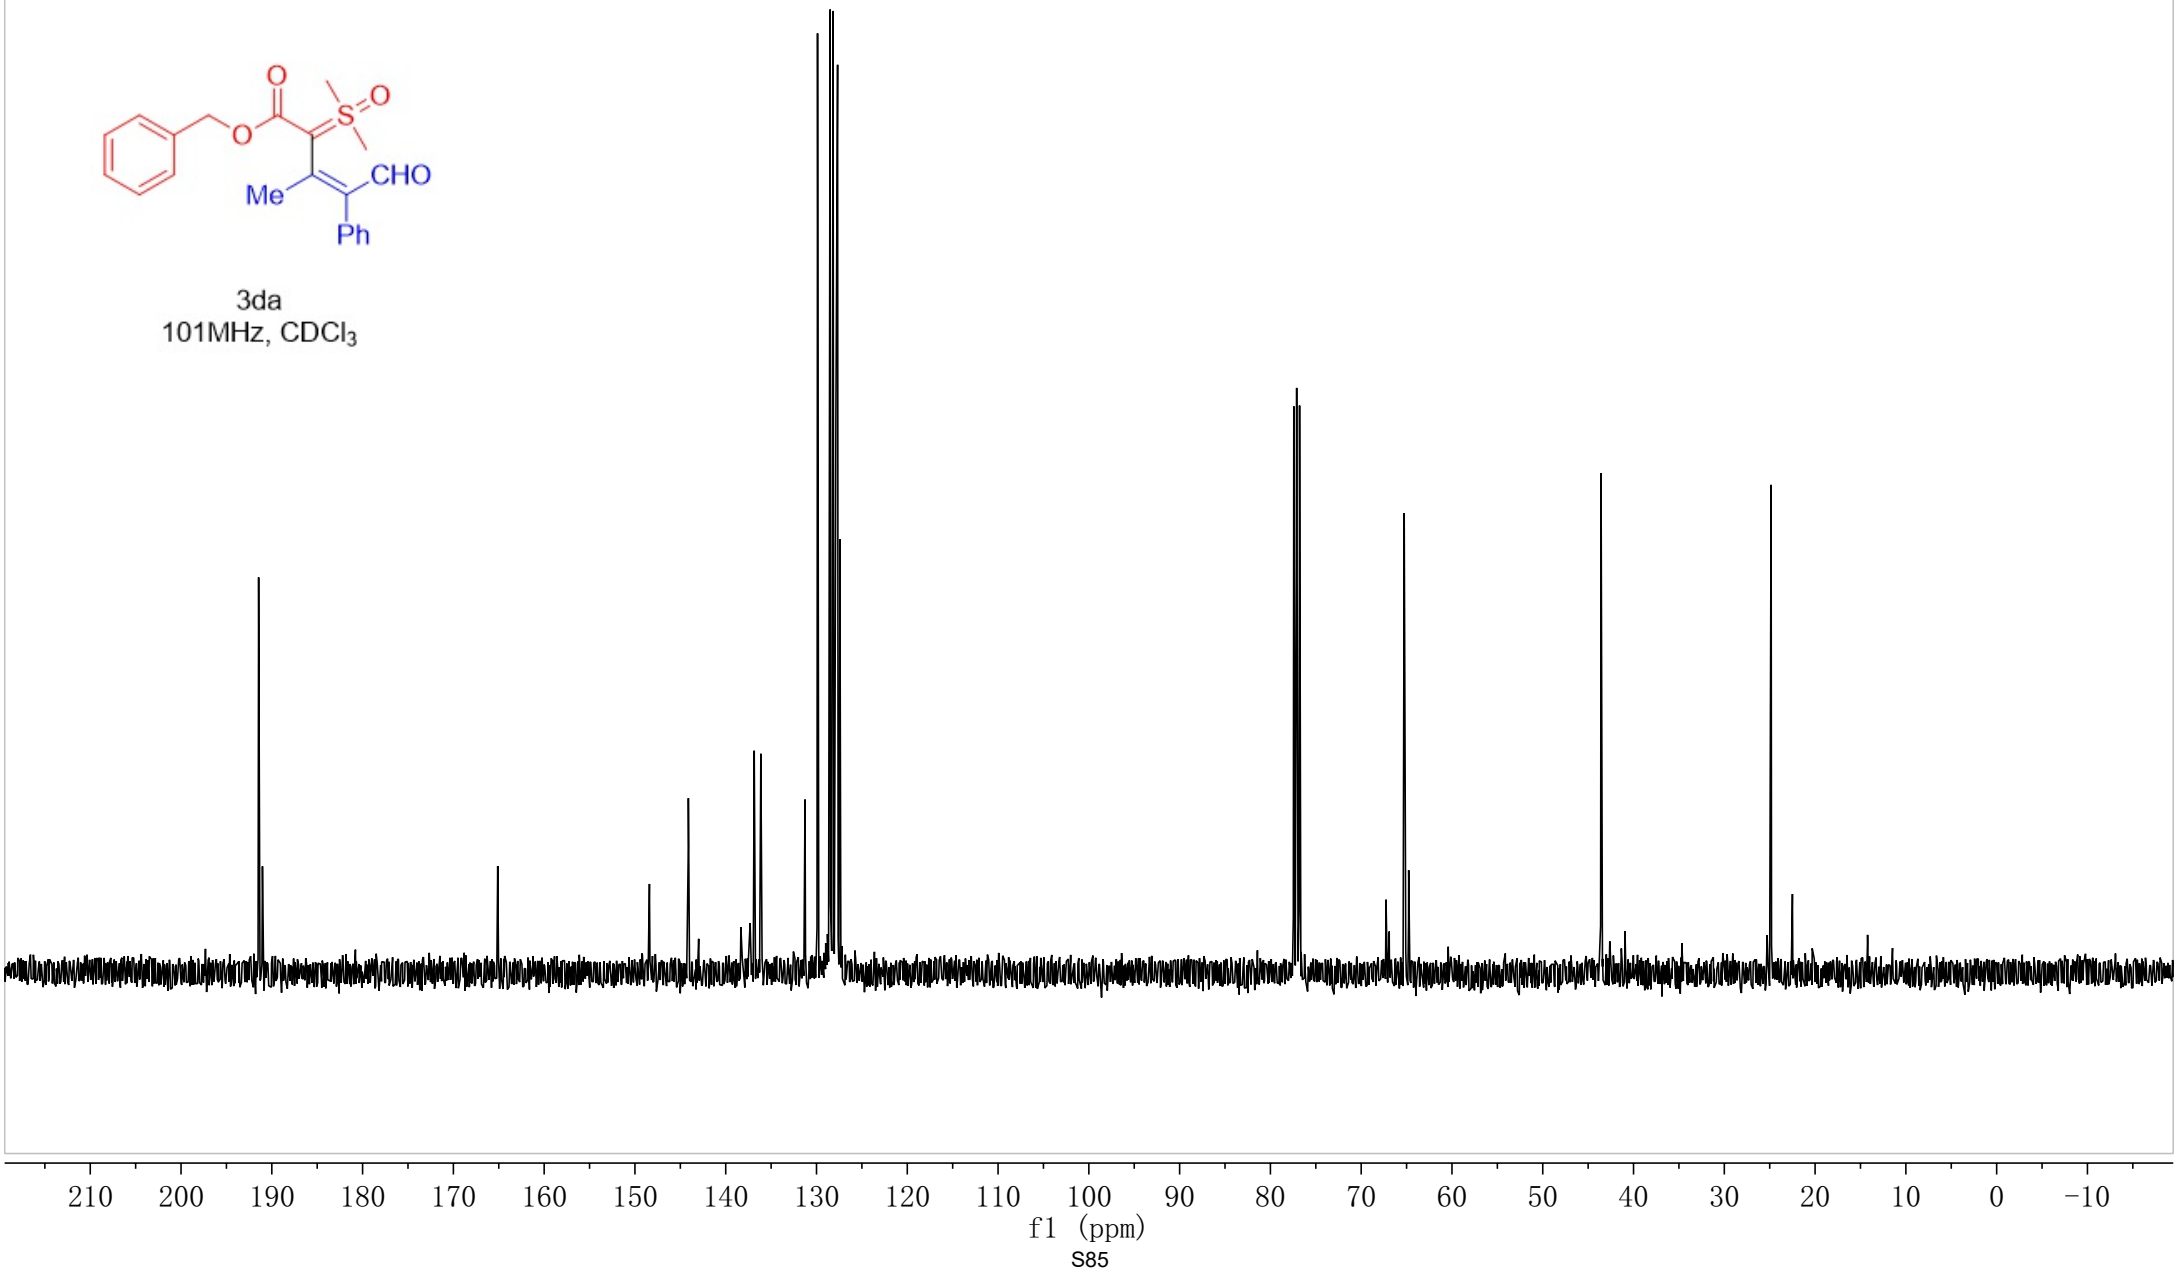

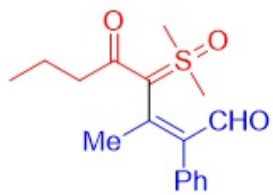

3ea  
400 MHz, (CD<sub>3</sub>)<sub>2</sub>SO

9.892  
7.423  
7.420  
7.416  
7.407  
7.402  
7.399  
7.387  
7.384  
7.382  
7.379  
7.345  
7.341  
7.338  
7.328  
7.323  
7.317  
7.304  
7.301  
7.103  
7.099  
7.094  
7.086  
7.082  
7.079

3.683  
3.652  
2.234  
2.215  
2.198  
2.179  
2.161  
2.090  
2.079  
2.062  
2.044  
2.026  
2.008  
1.989  
1.984

1.536  
1.517  
1.511  
1.499  
1.493  
1.480  
1.474  
0.844  
0.826  
0.826  
0.807

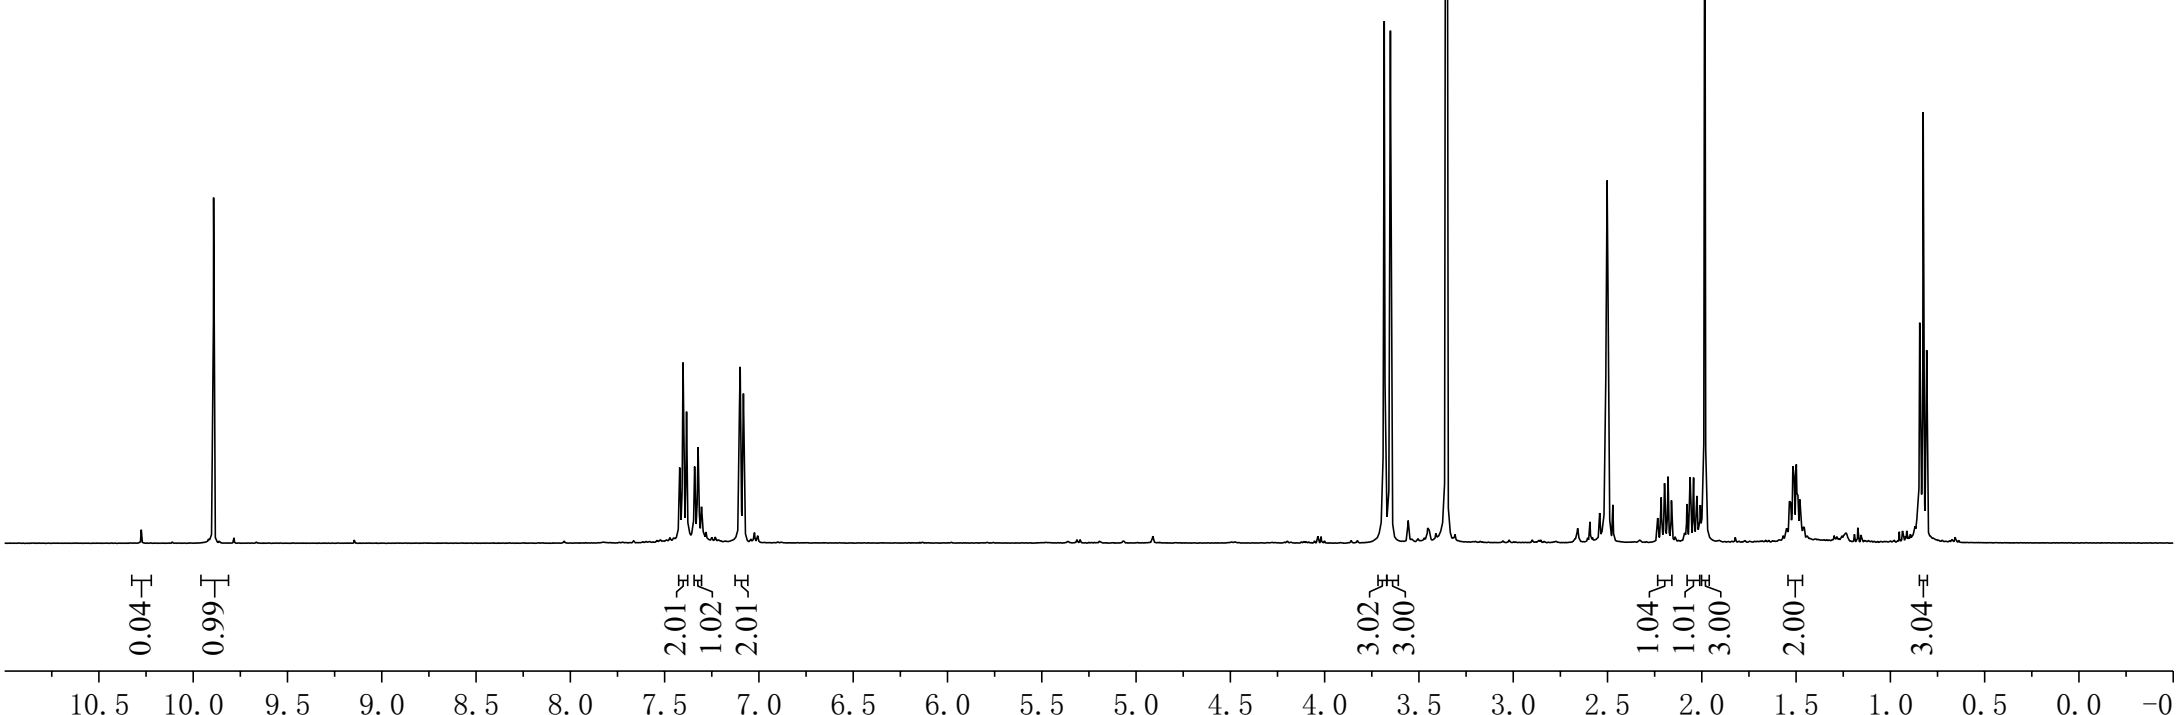

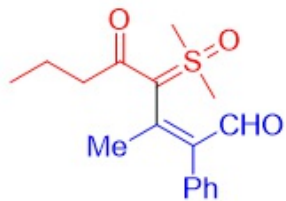

3ea  
101 MHz, (CD<sub>3</sub>)<sub>2</sub>SO

—192.230  
—187.145

—151.328  
—144.885  
~136.511  
~130.052  
~128.567  
~127.702

—85.532

~42.422  
~41.891  
~39.599

~26.083  
~18.982  
~14.304

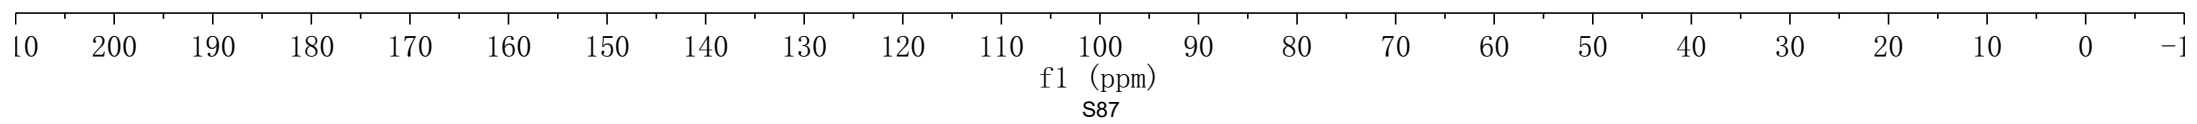

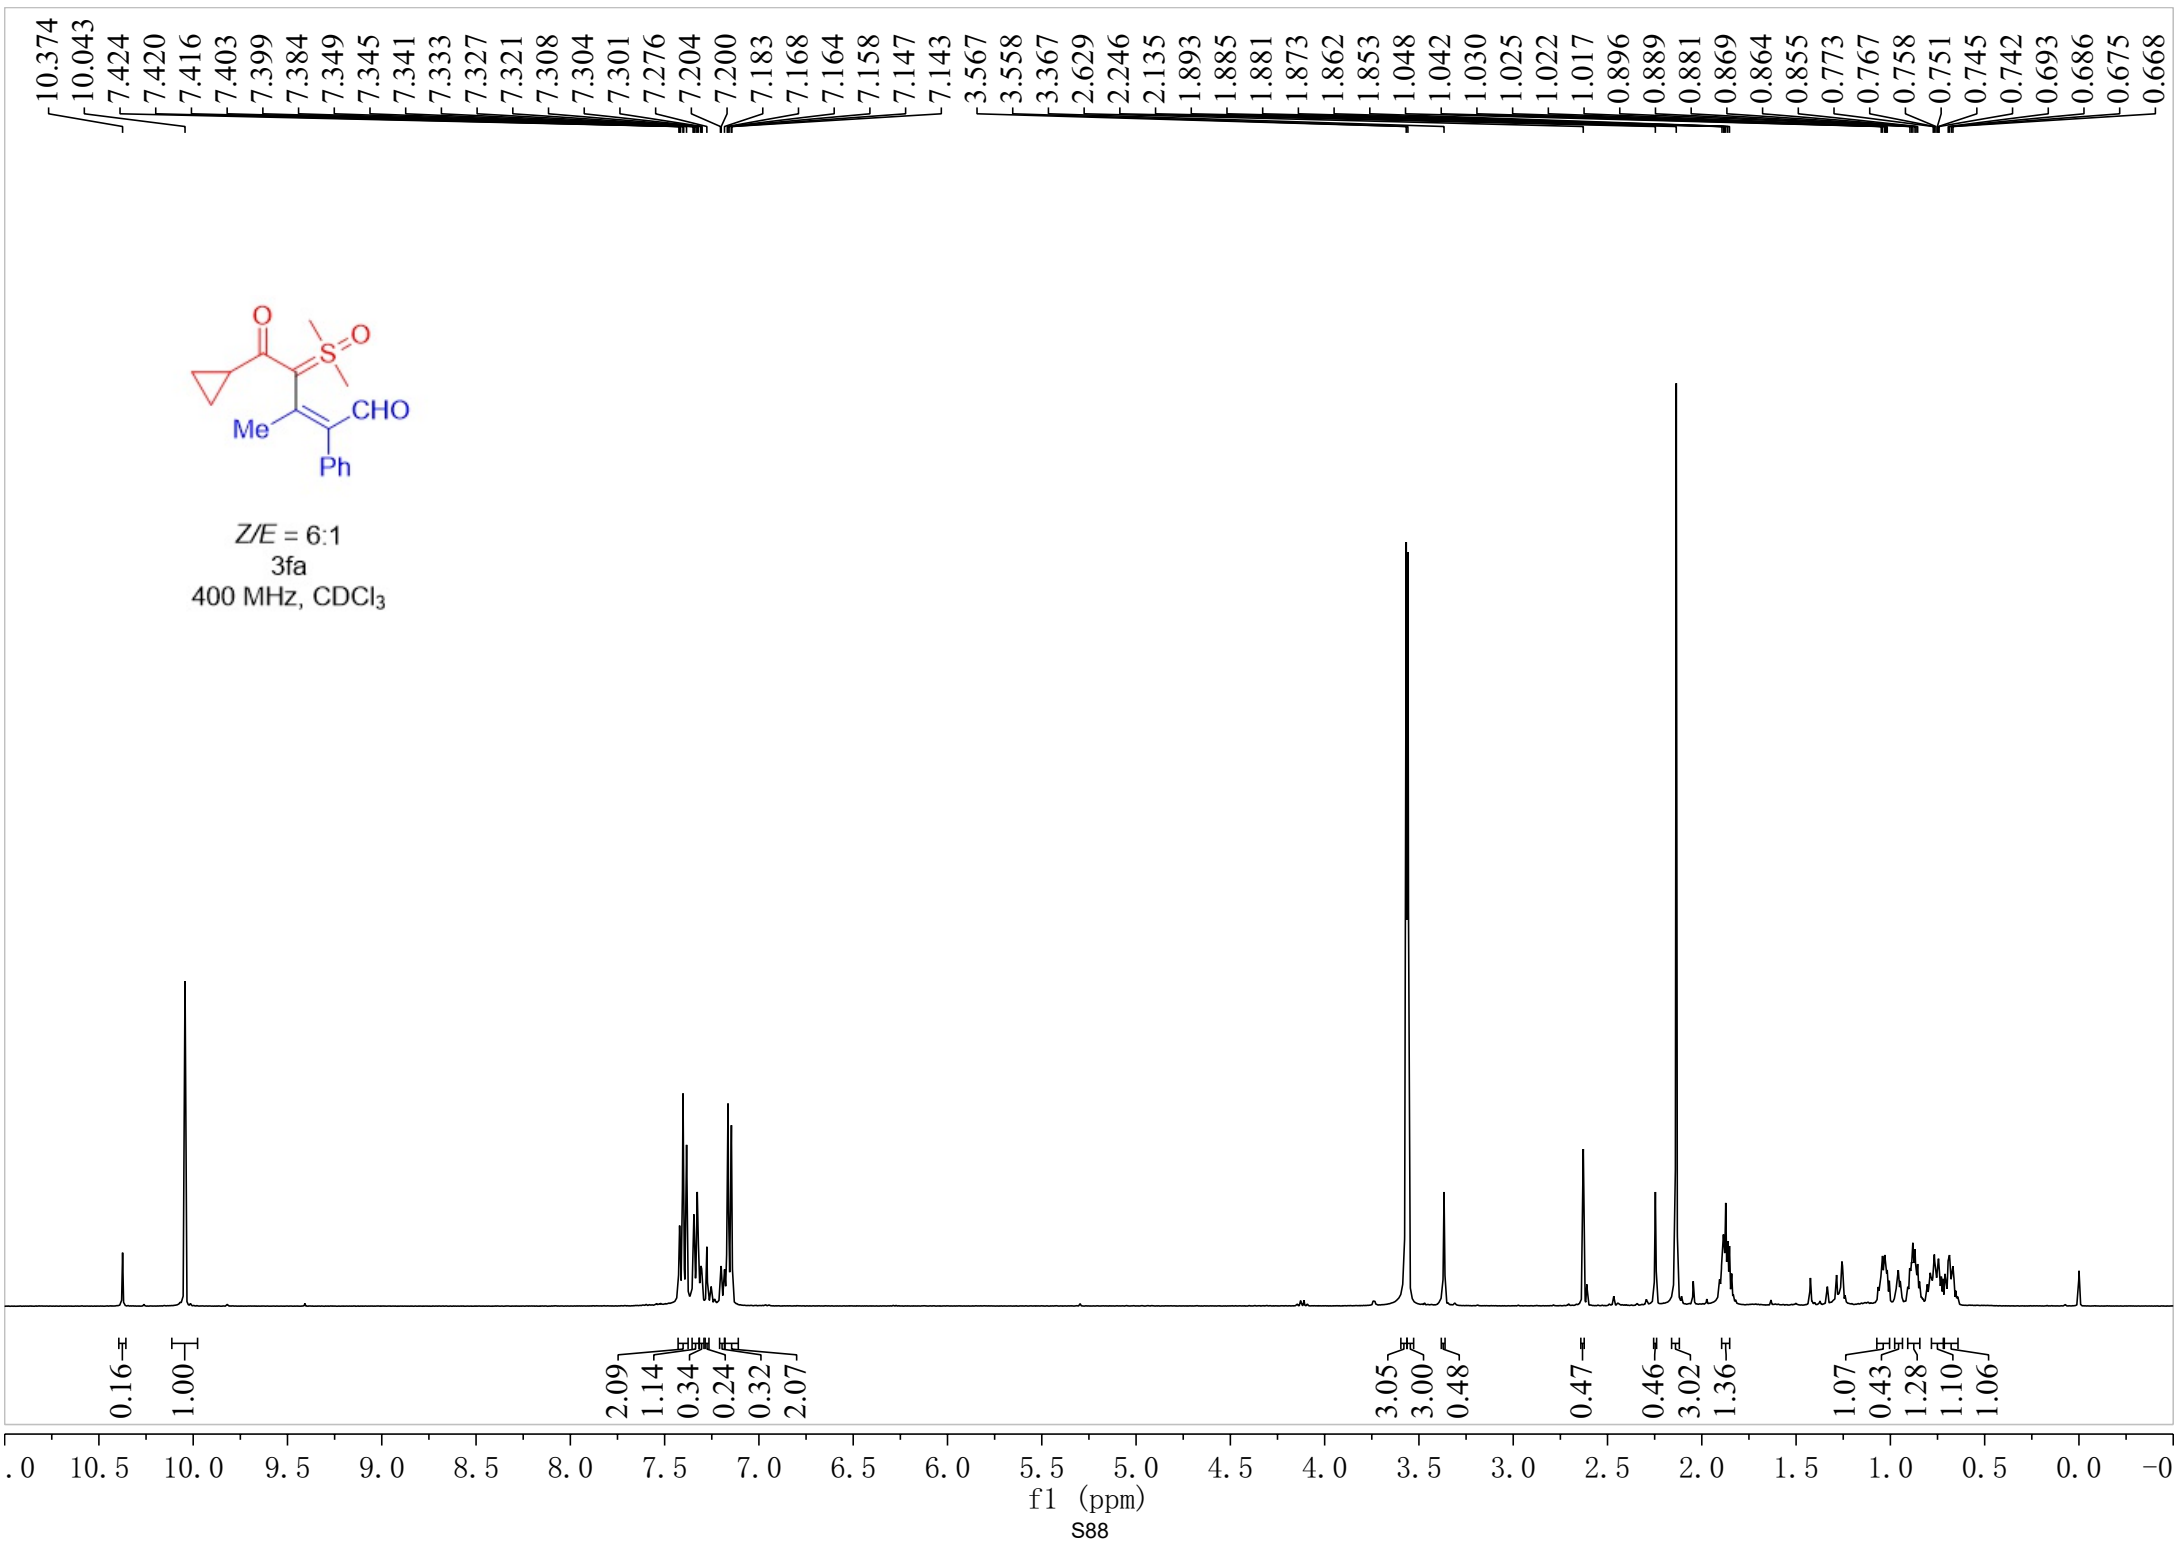

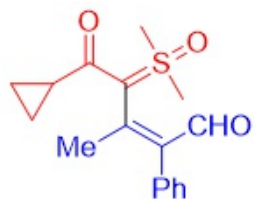

3fa  
101 MHz, CDCl<sub>3</sub>

— 191.63  
— 188.25

— 149.73  
— 145.61

— 135.70  
— 129.73  
— 128.30  
— 127.64

— 82.66

— 43.83  
— 43.59

— 25.85

— 16.89

— 8.77  
— 8.03

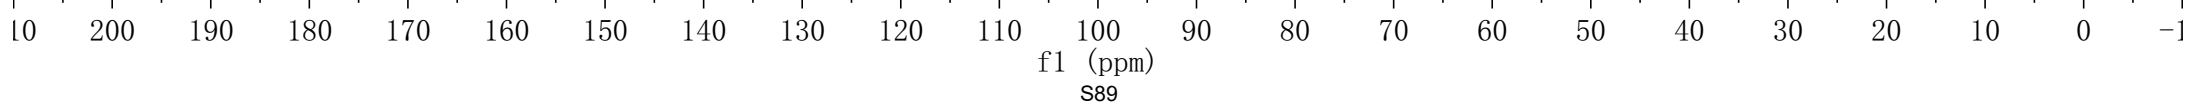

10.341  
 9.878  
 7.423  
 7.420  
 7.416  
 7.402  
 7.398  
 7.387  
 7.383  
 7.354  
 7.344  
 7.341  
 7.337  
 7.328  
 7.322  
 7.316  
 7.311  
 7.307  
 7.304  
 7.300  
 7.294  
 7.269  
 7.252  
 7.248  
 7.244  
 7.236  
 7.230  
 7.149  
 7.145  
 7.140  
 7.137  
 7.132  
 7.128  
 7.125  
 7.120  
 7.116  
 7.112  
 5.985  
 5.981  
 5.978  
 5.895  
 5.891  
 5.888  
 5.884  
 5.881  
 3.630  
 3.619  
 3.433  
 2.529  
 2.328  
 2.120  
 2.117  
 2.089  
 2.085  
 2.053  
 2.044  
 1.903  
 1.900  
 1.801  
 1.798

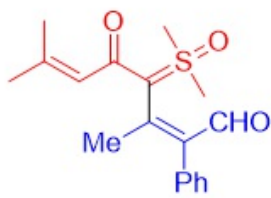

Z/E = 6:1  
 3ga  
 400 MHz, CDCl<sub>3</sub>

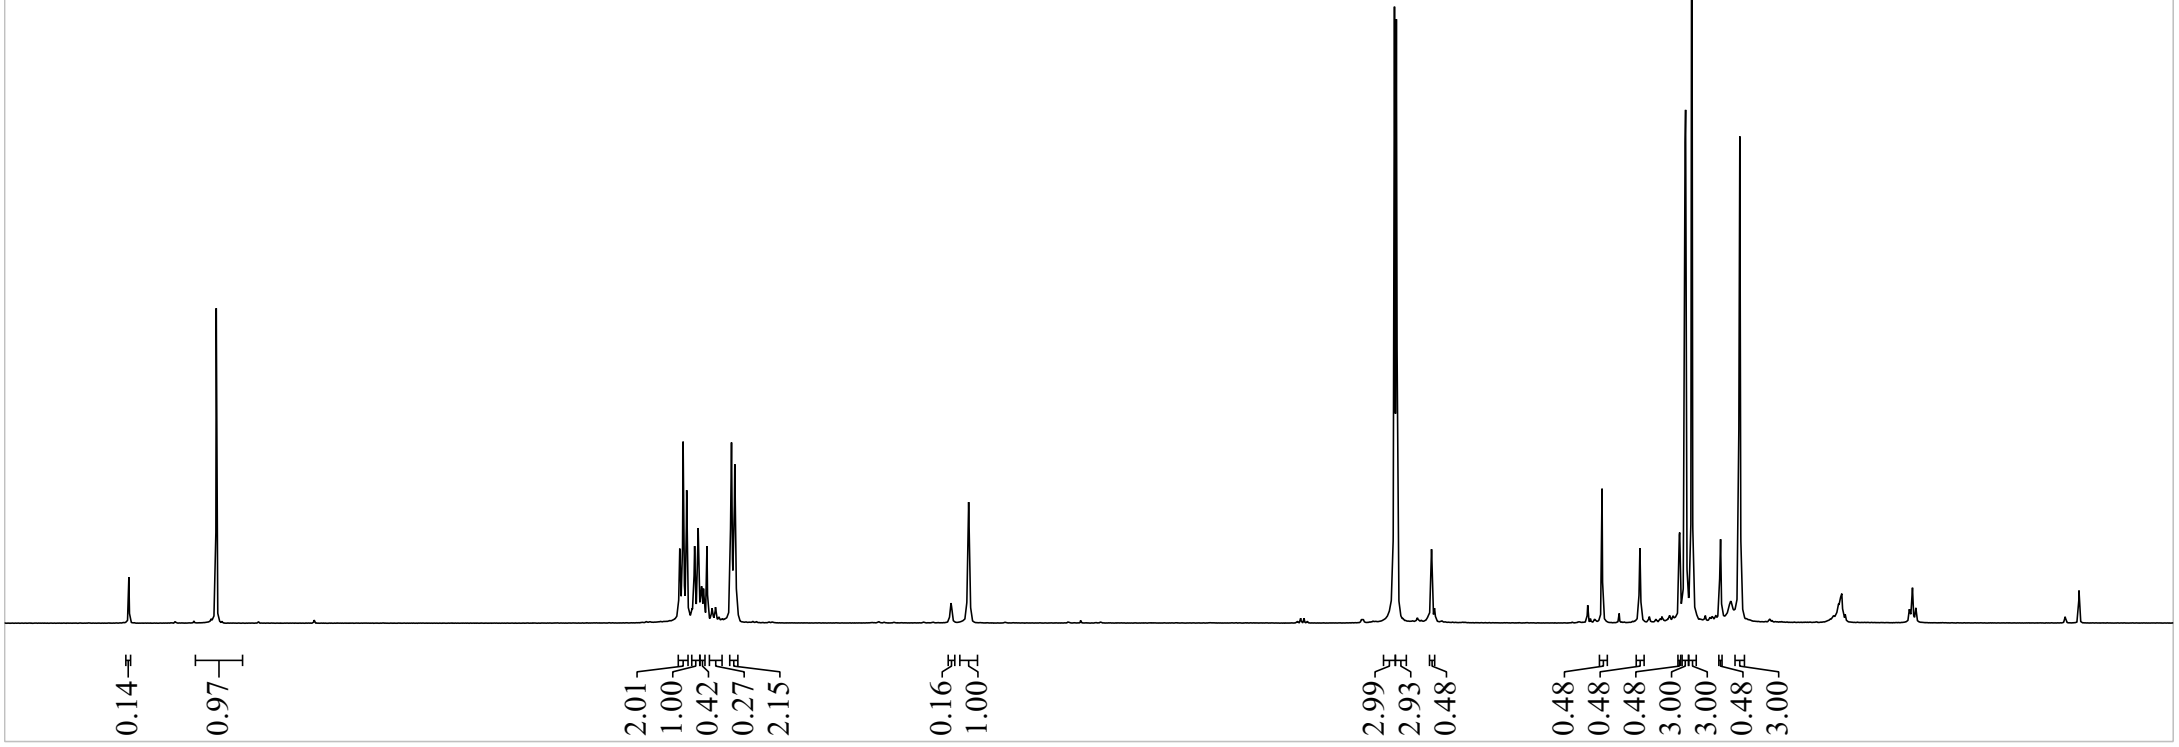

10.5 10.0 9.5 9.0 8.5 8.0 7.5 7.0 6.5 6.0 5.5 5.0 4.5 4.0 3.5 3.0 2.5 2.0 1.5 1.0 0.5 0.0 -0

f1 (ppm)  
 S90

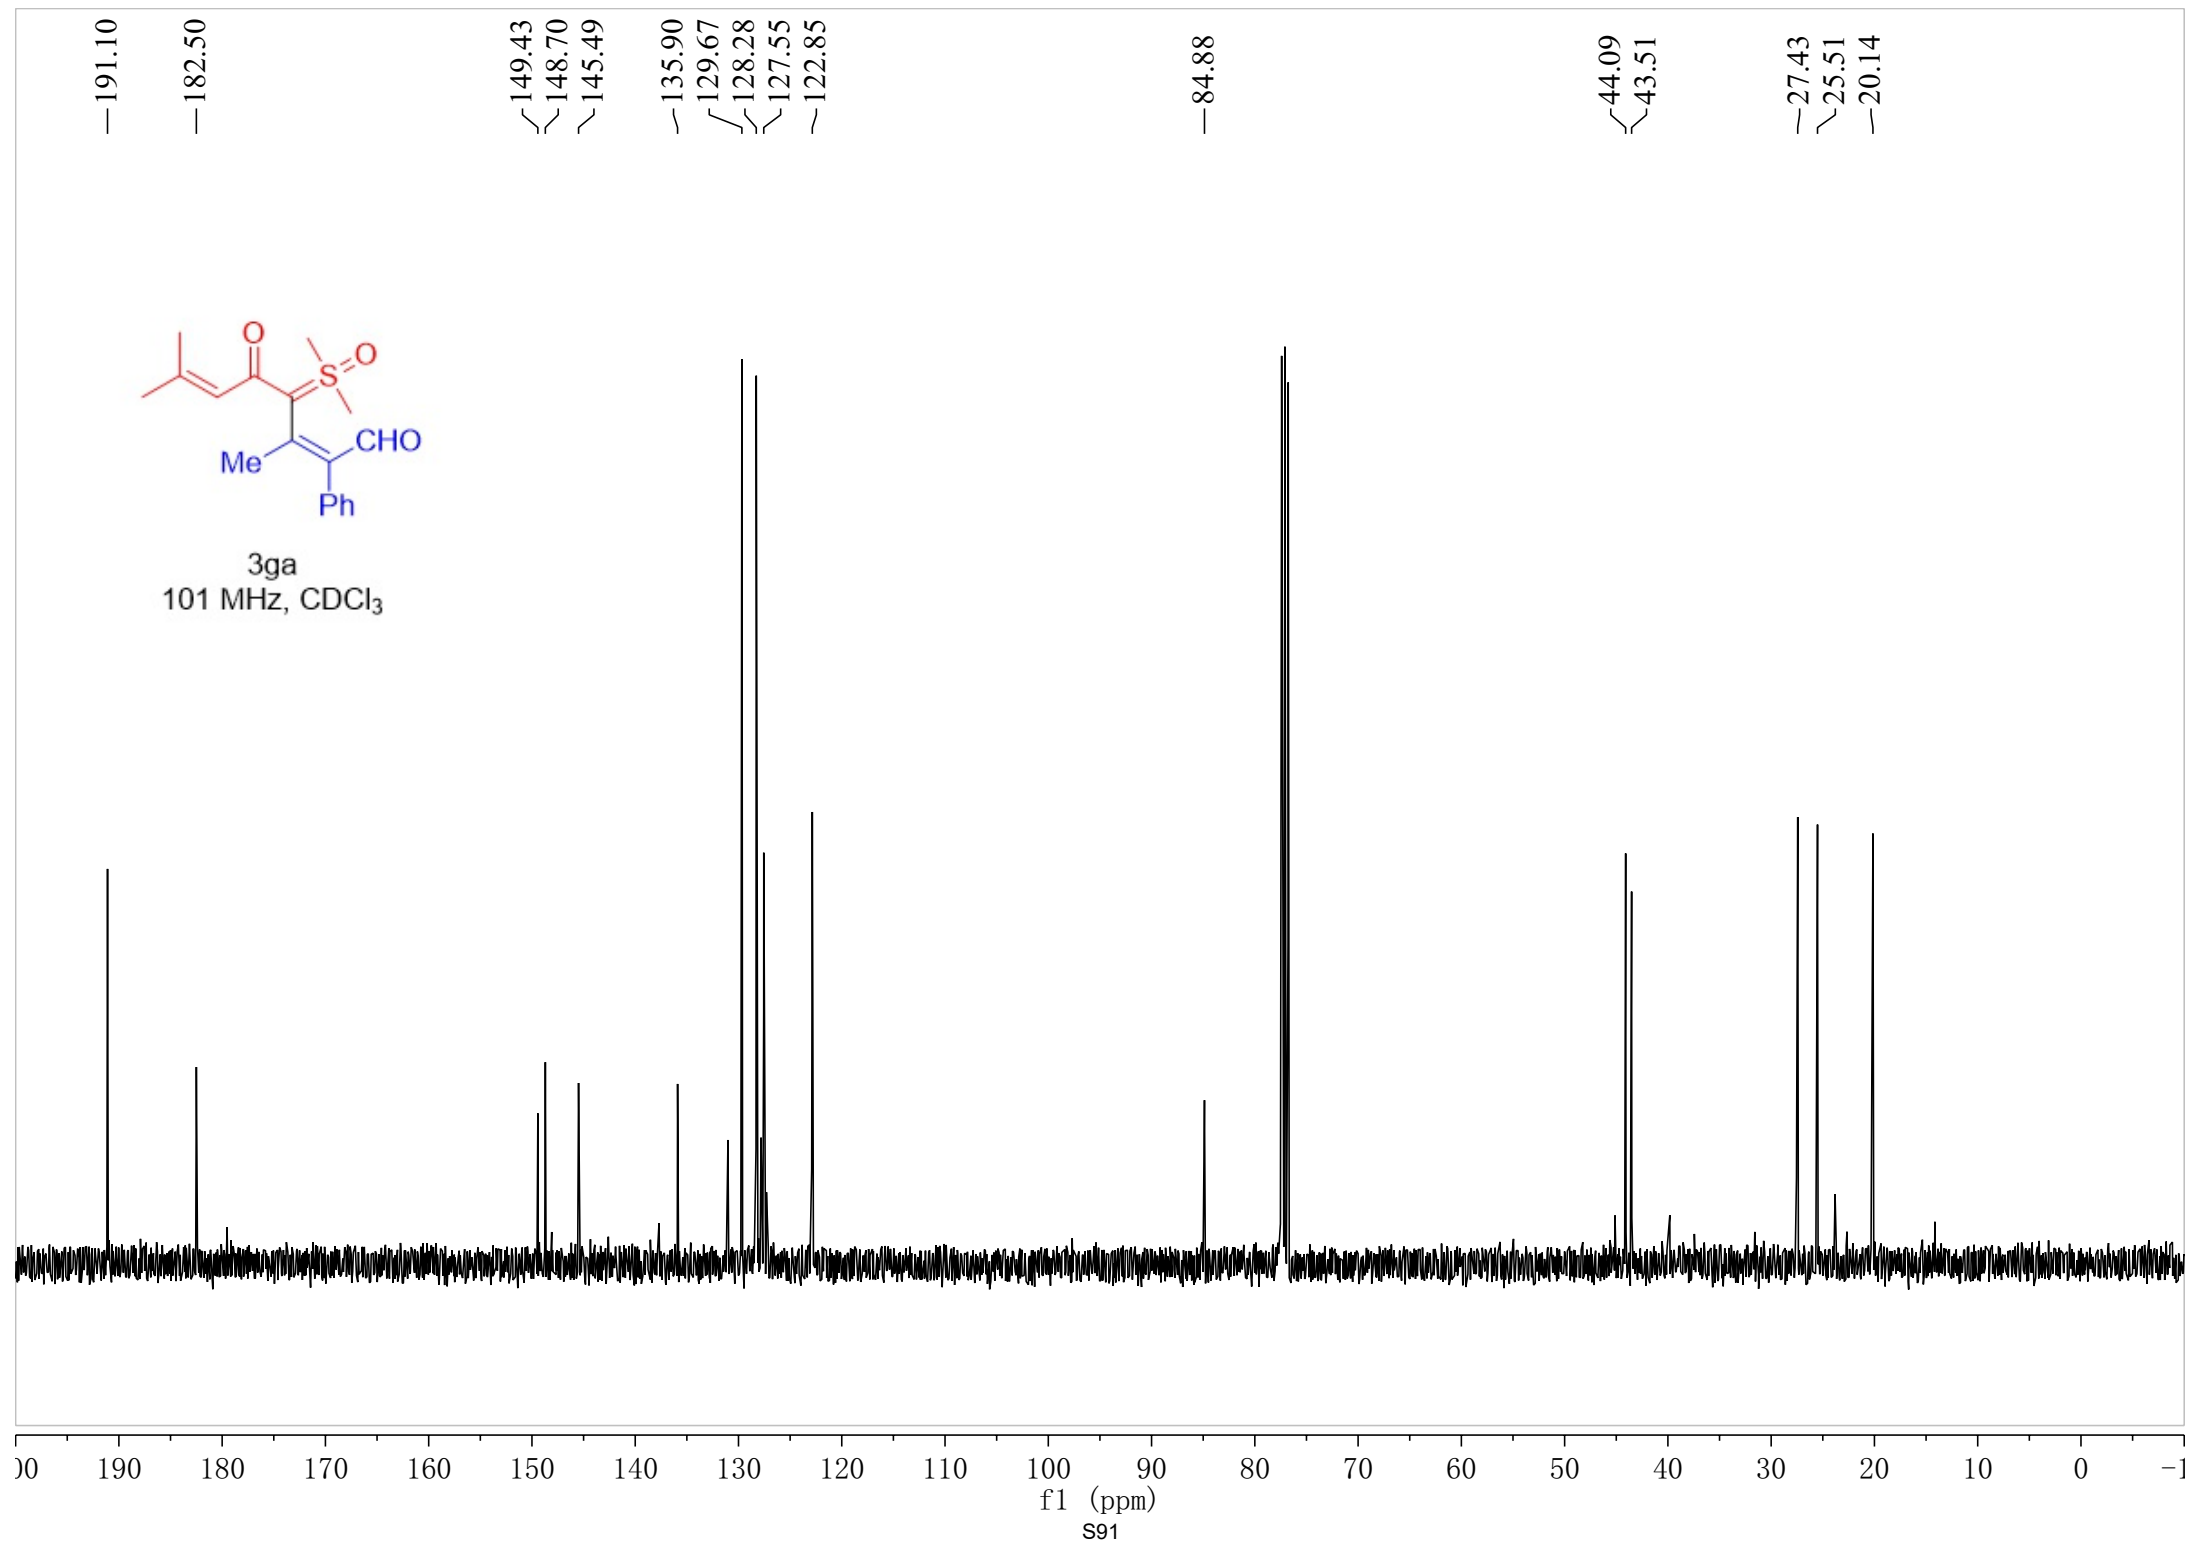

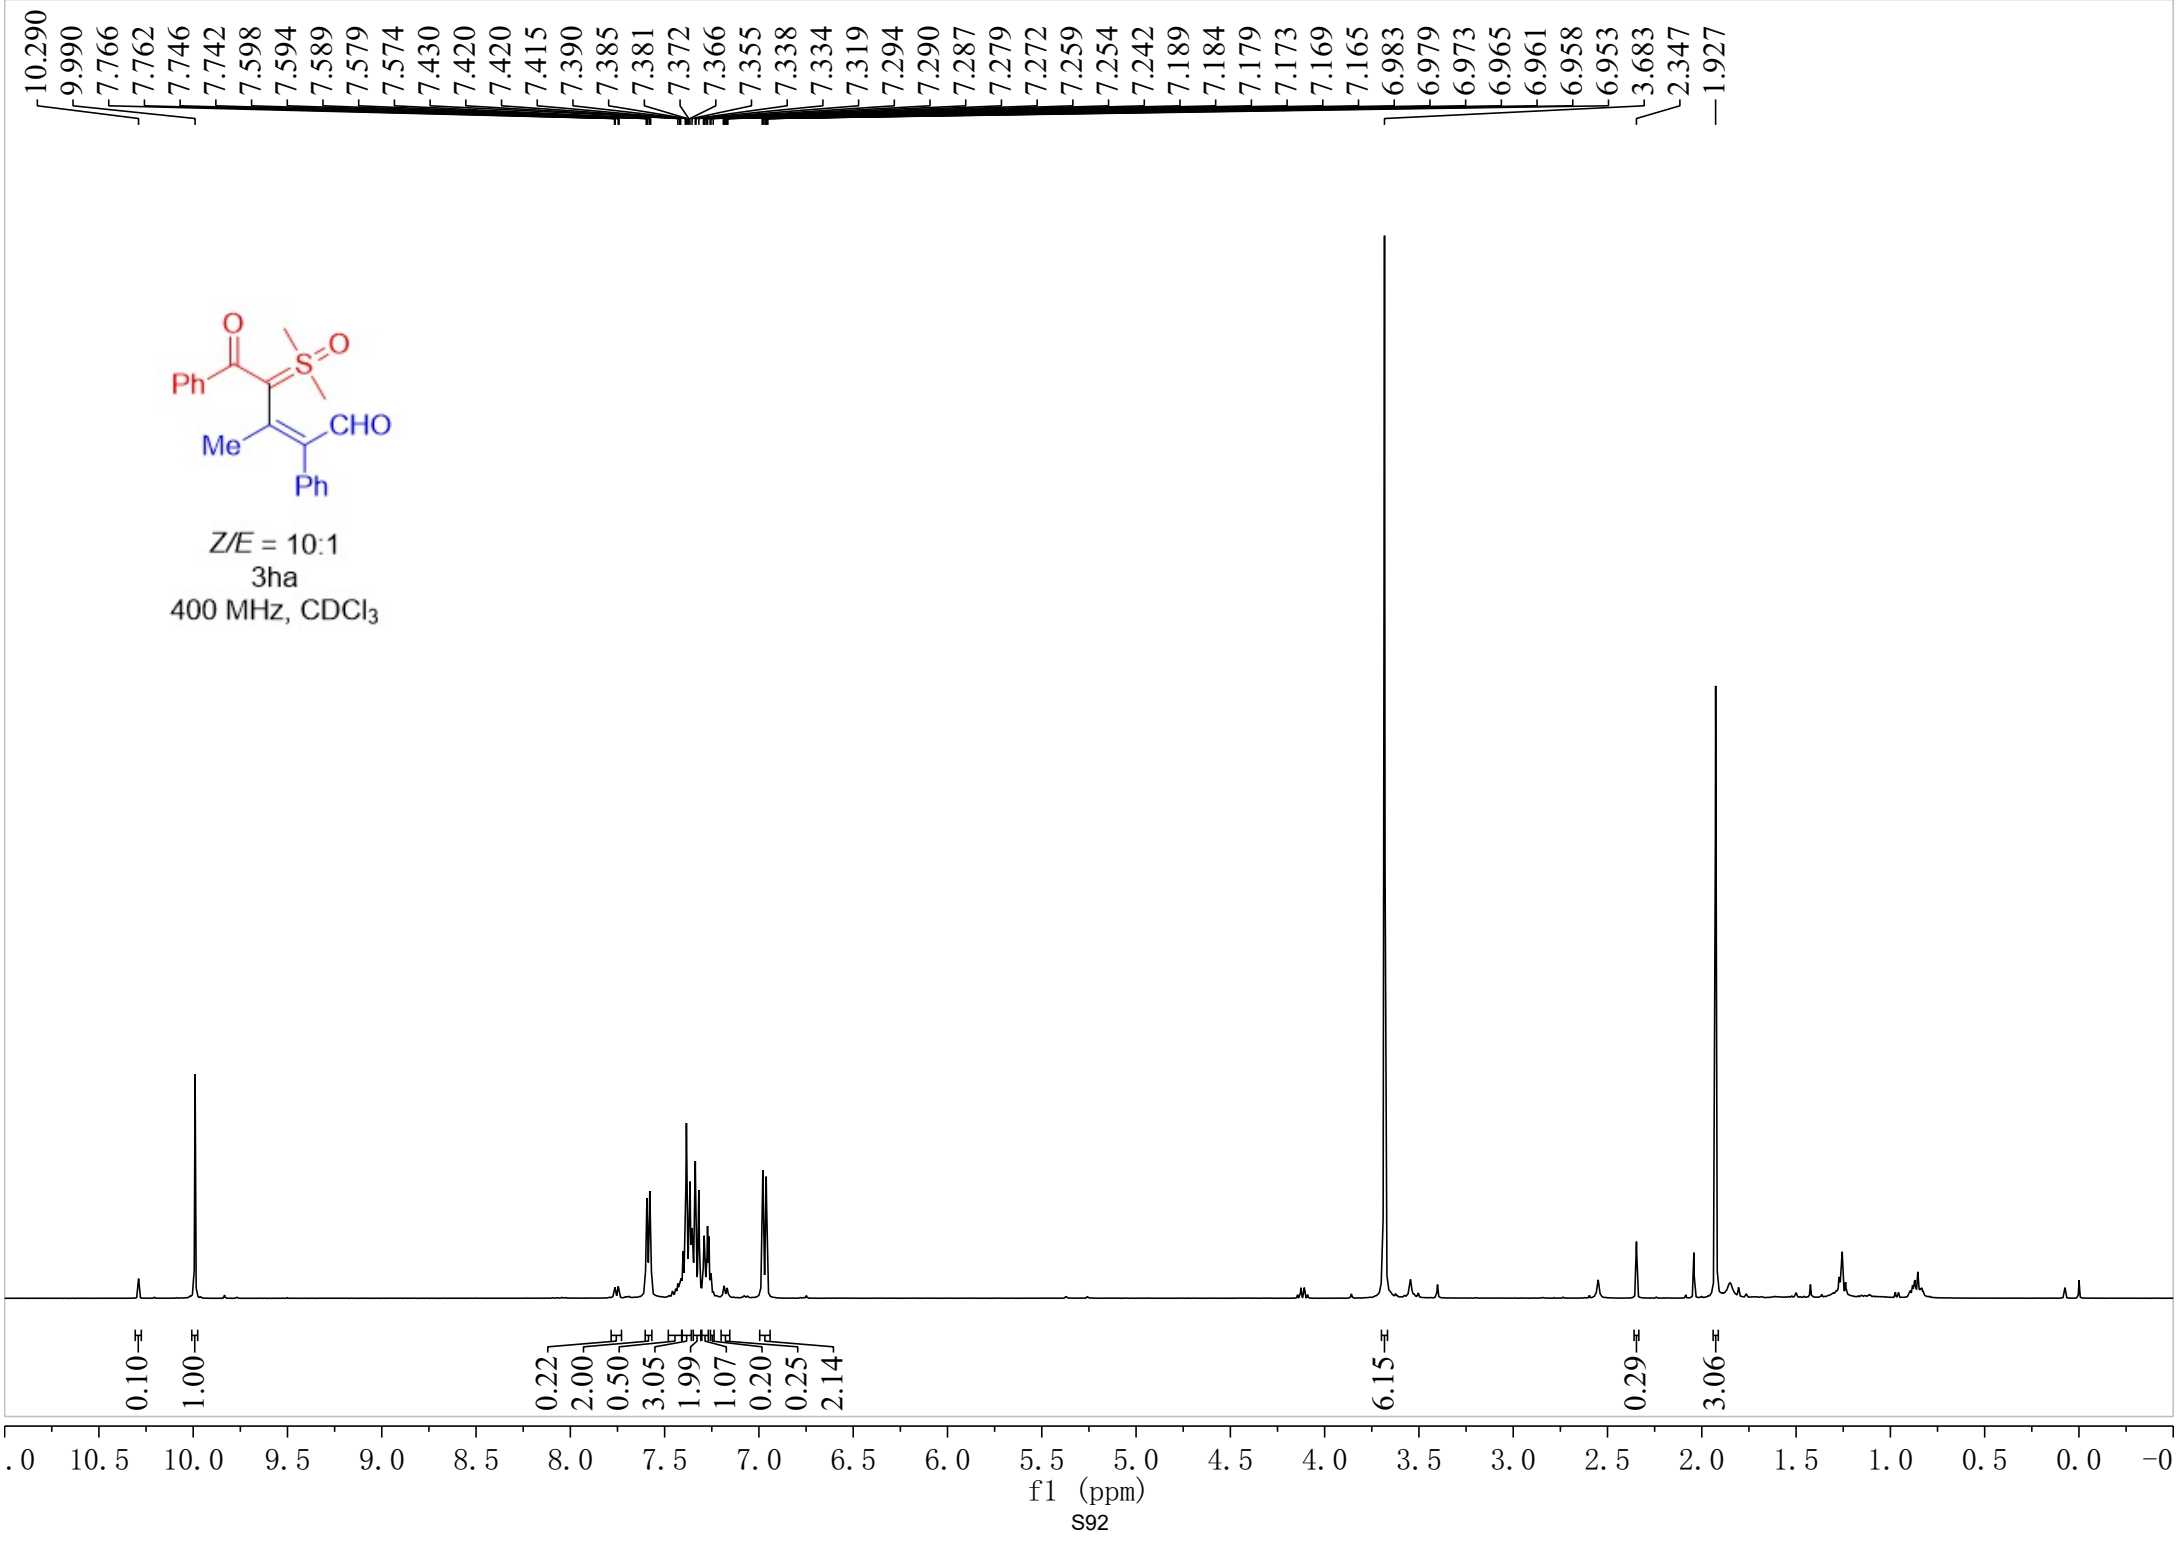



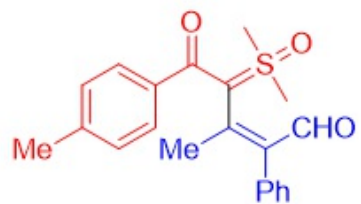

Z/E = 10:1  
3ia  
400 MHz, CDCl<sub>3</sub>

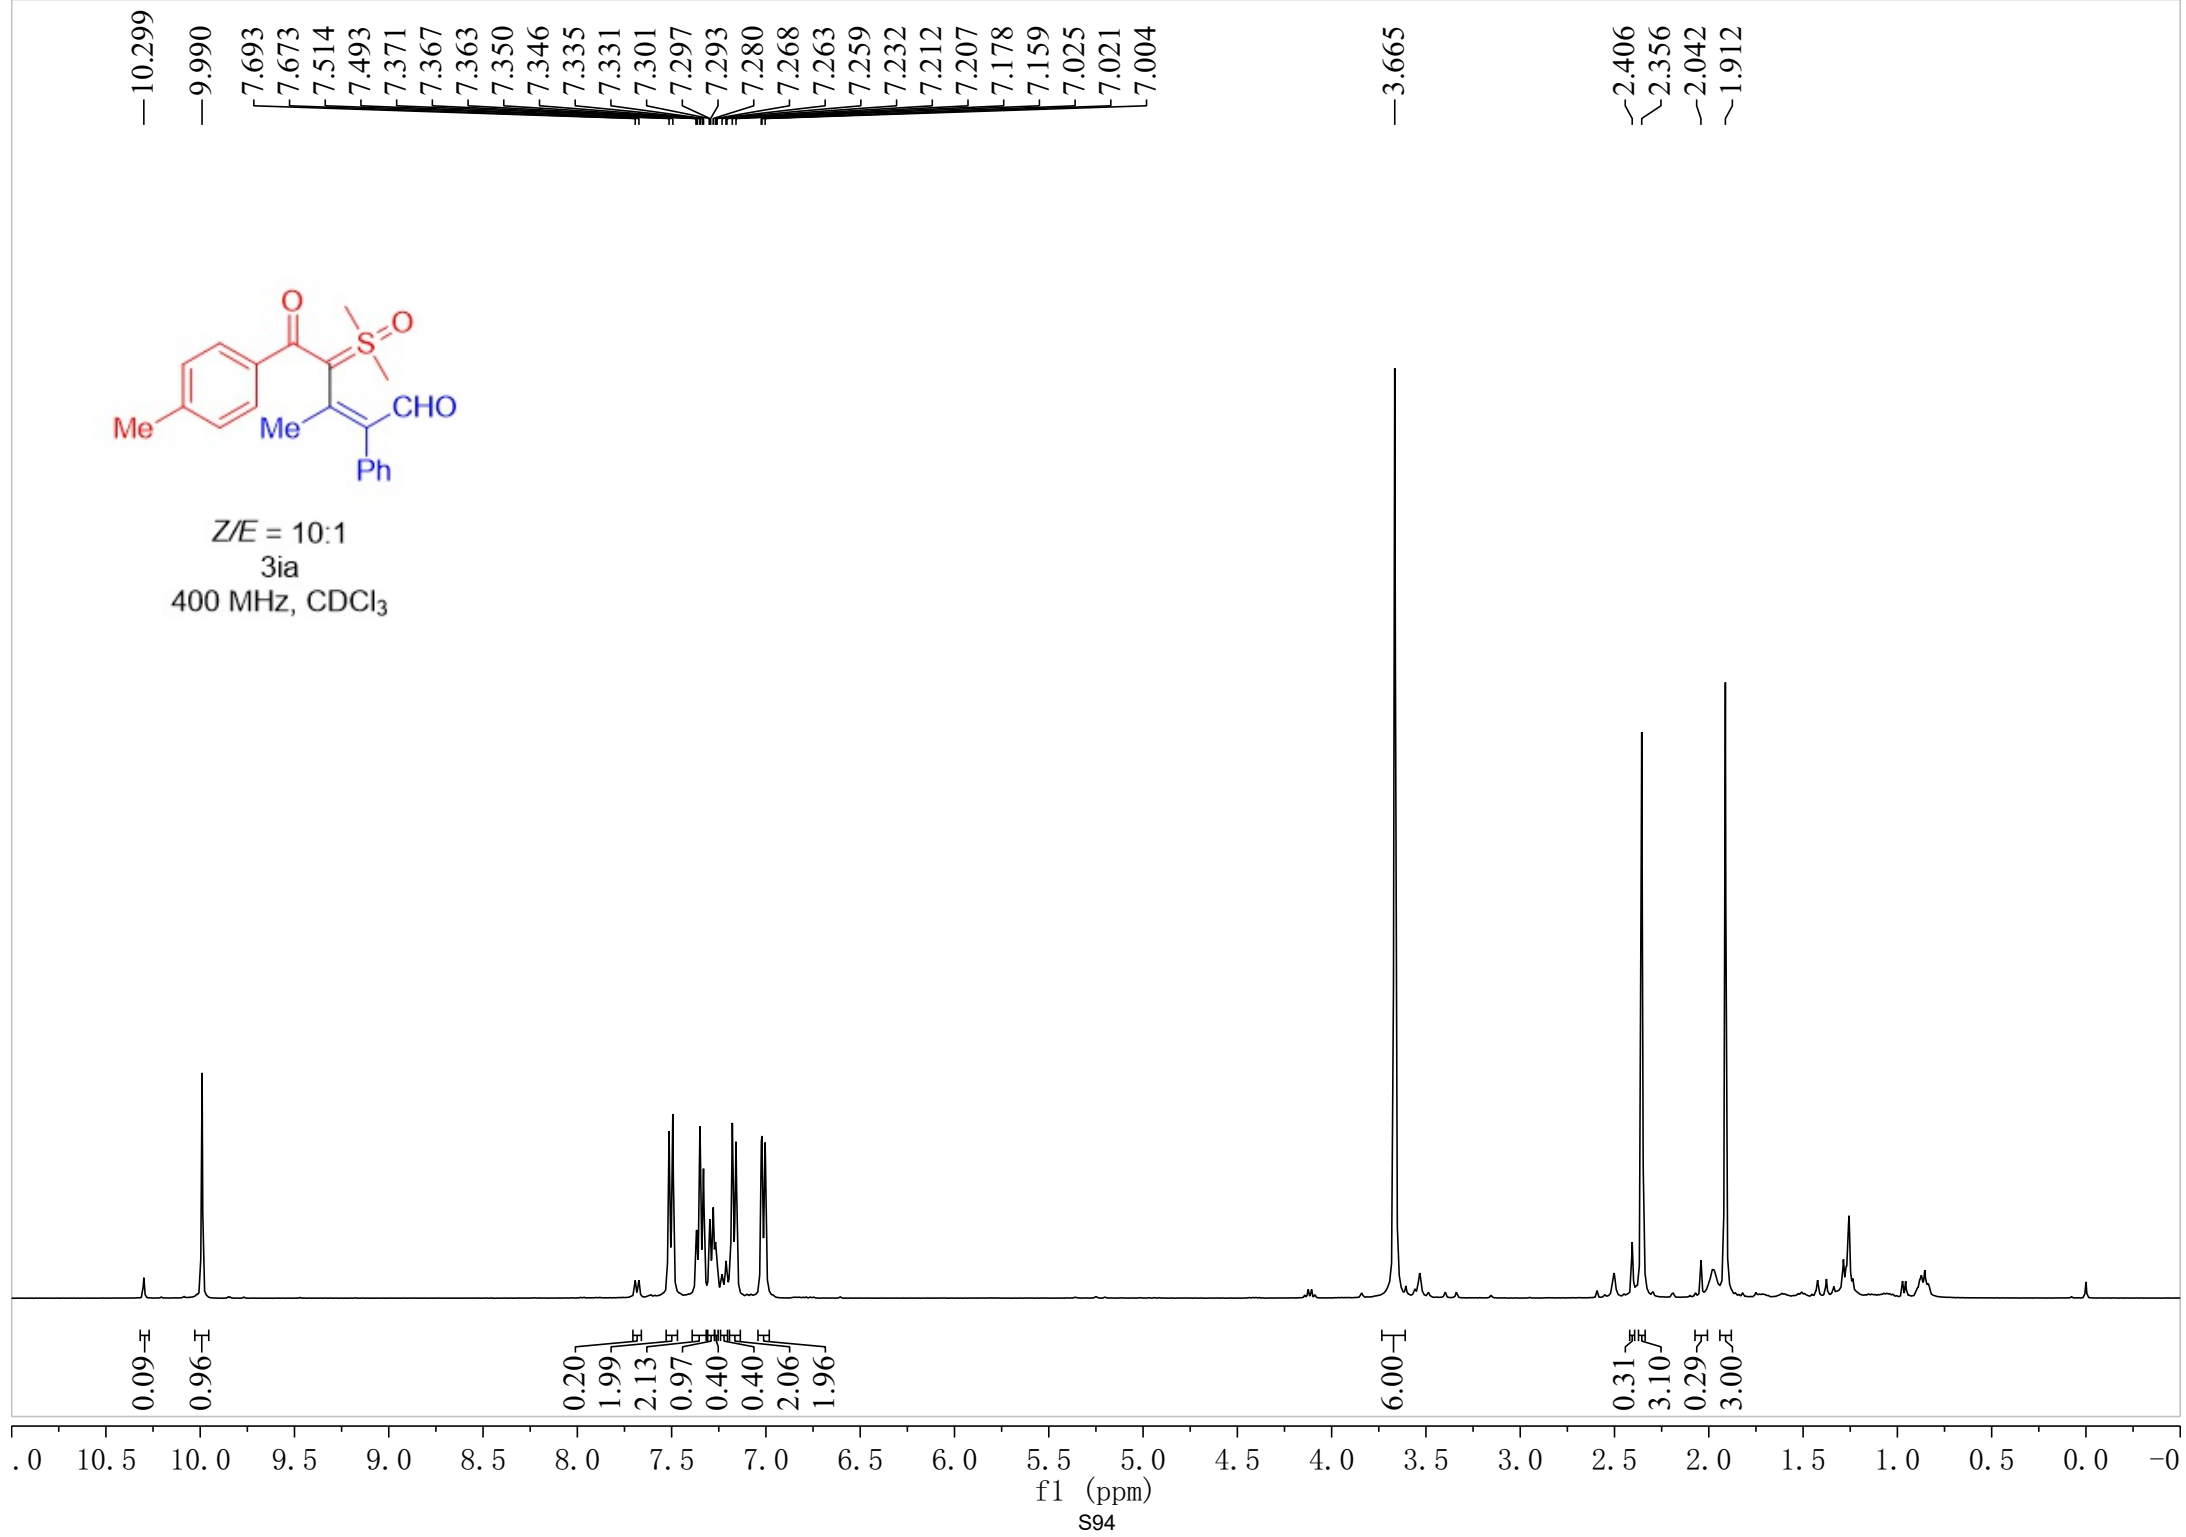

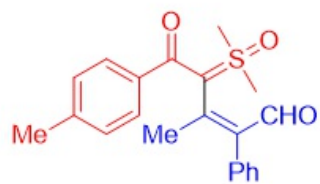

3ia  
101 MHz, CDCl<sub>3</sub>

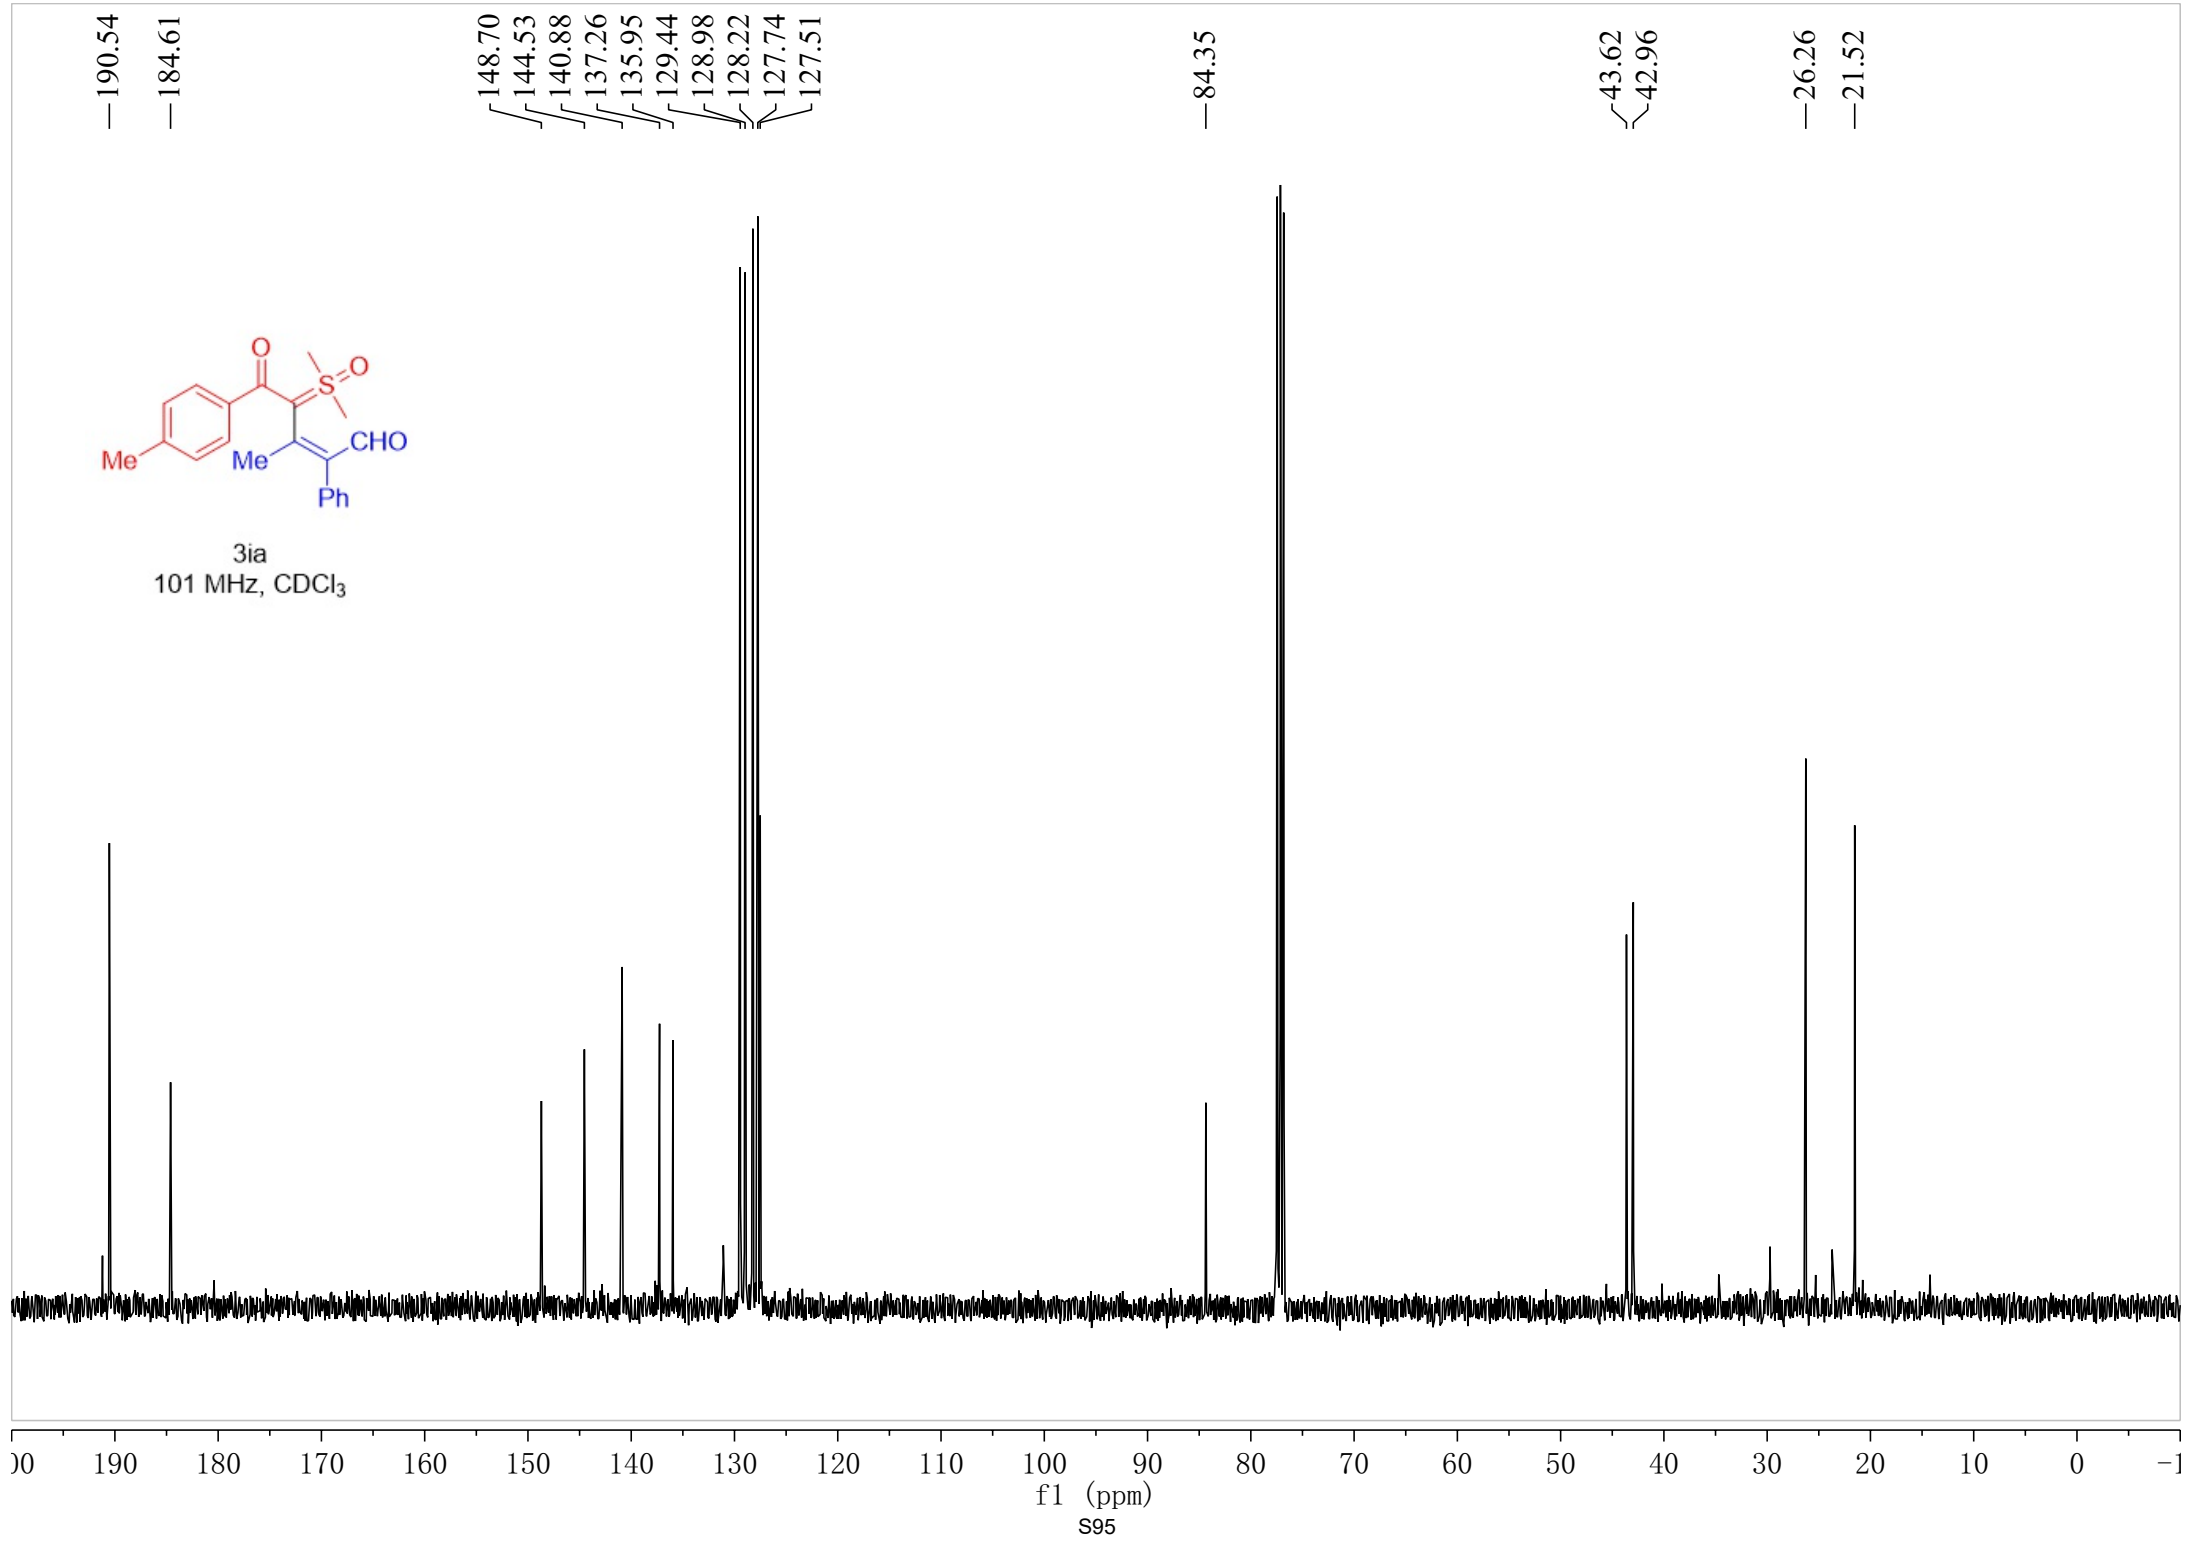

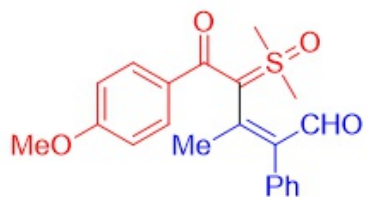

Z/E = 10:1  
3ja  
400 MHz, CDCl<sub>3</sub>

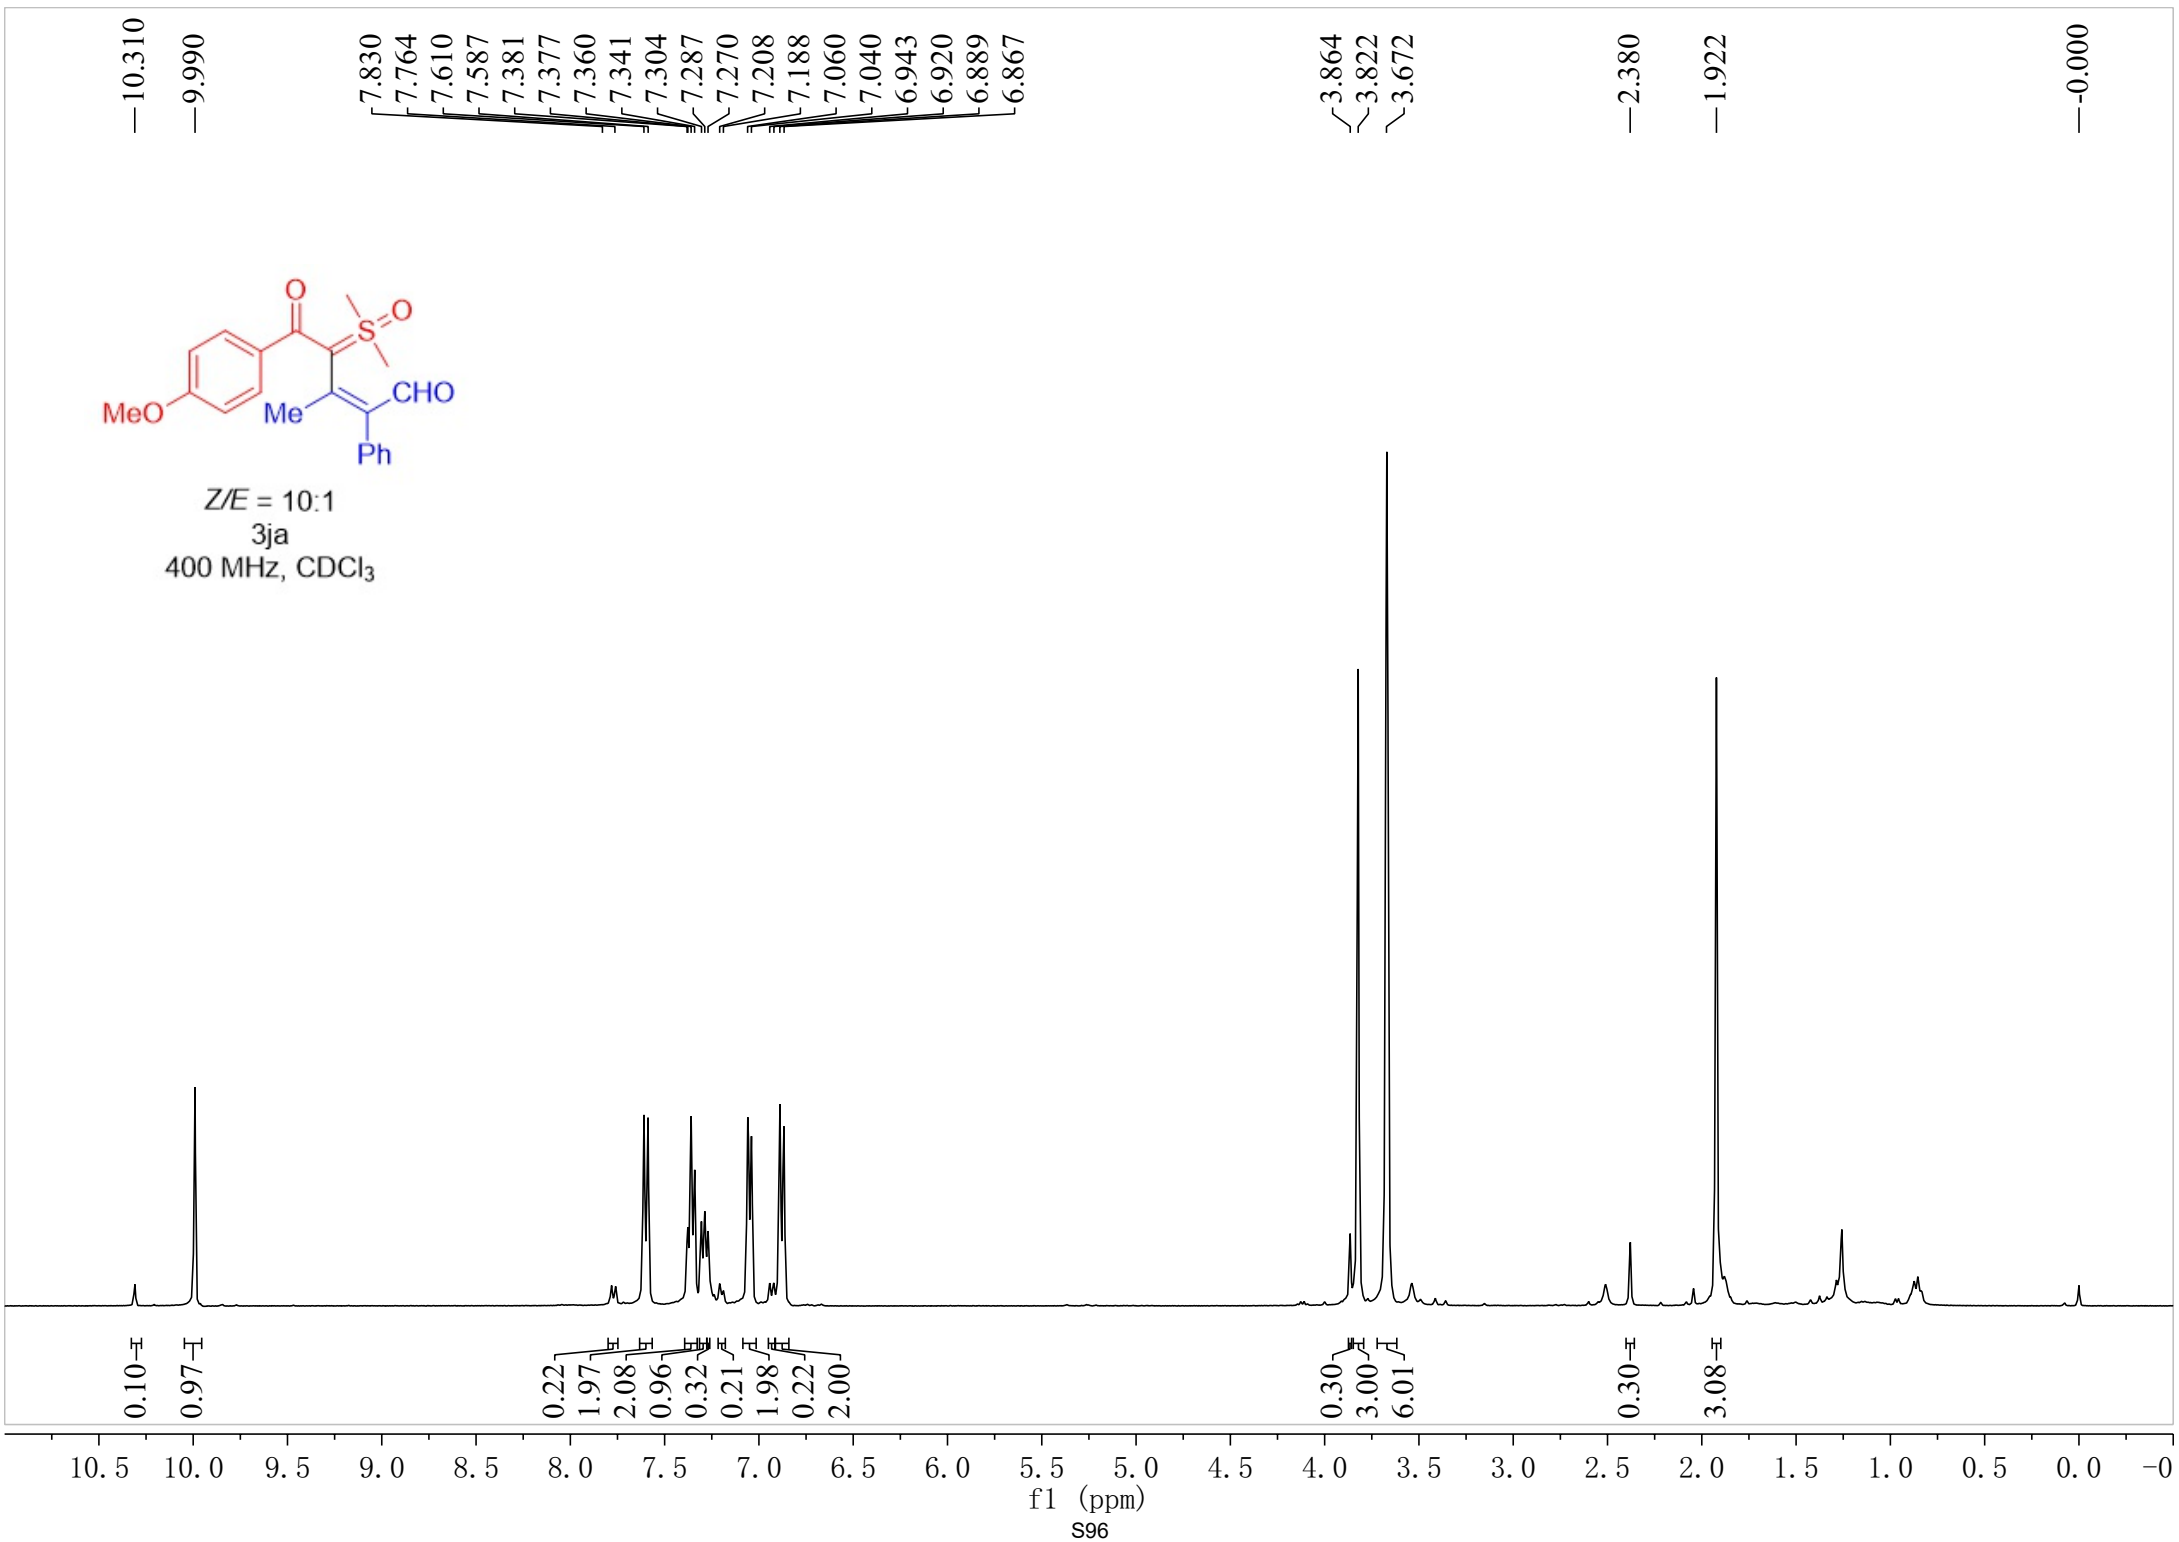

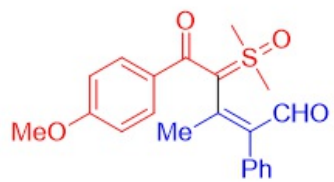

3ja  
101 MHz, CDCl<sub>3</sub>

—190.47  
—183.94  
  
—161.49  
—148.63  
—144.47  
—135.96  
—132.43  
—129.63  
—129.49  
—128.23  
—127.52  
  
—113.53  
  
—83.99  
  
—55.36  
—43.83  
—43.06  
  
—26.21

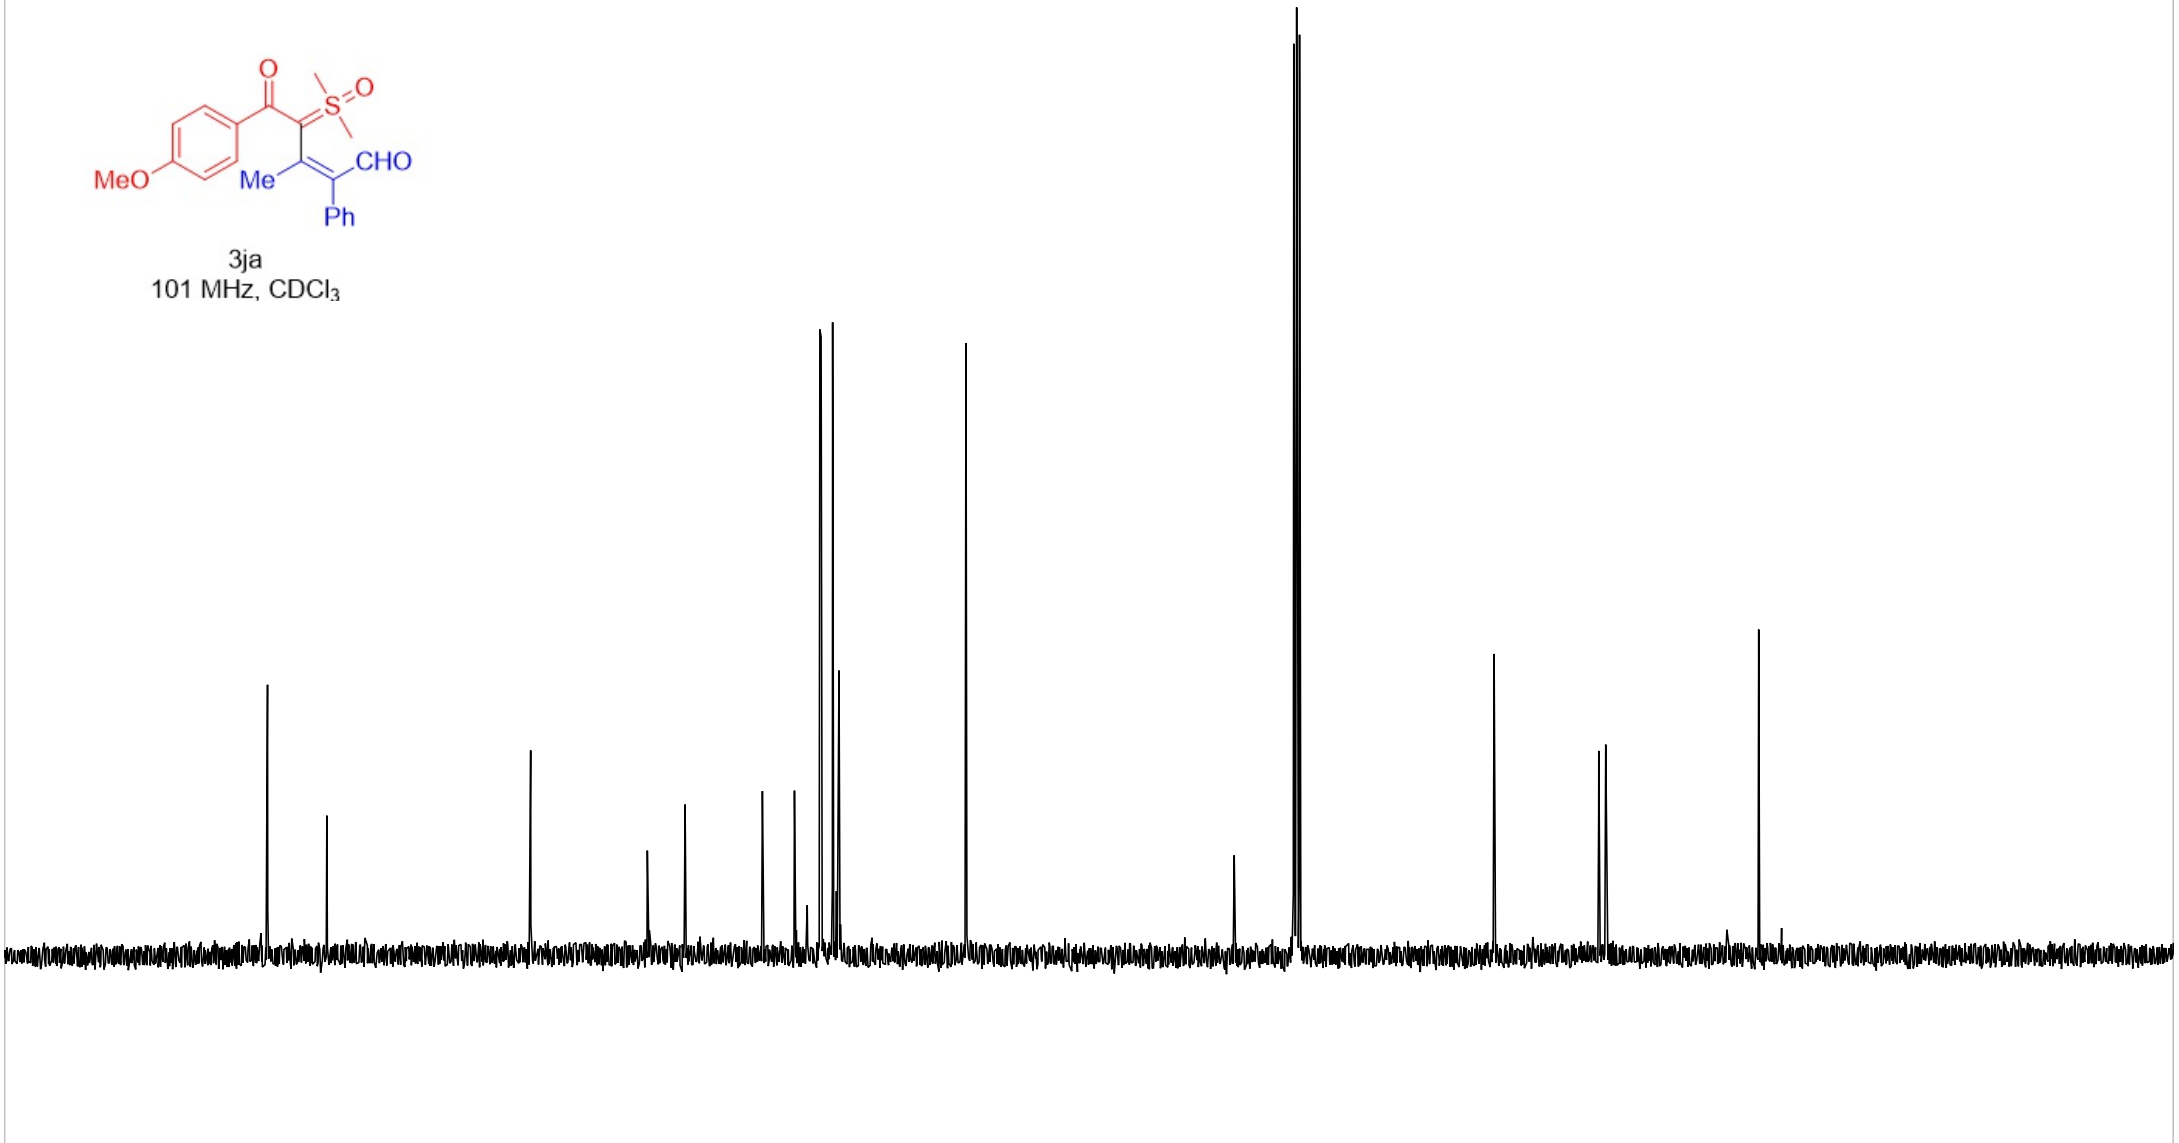

210 200 190 180 170 160 150 140 130 120 110 100 90 80 70 60 50 40 30 20 10 0 -10

f1 (ppm)  
S97

10.282  
 9.967  
 7.605  
 7.555  
 7.534  
 7.526  
 7.521  
 7.520  
 7.516  
 7.505  
 7.499  
 7.495  
 7.484  
 7.479  
 7.473  
 7.463  
 7.458  
 7.453  
 7.382  
 7.379  
 7.374  
 7.366  
 7.361  
 7.357  
 7.346  
 7.343  
 7.341  
 7.337  
 7.316  
 7.312  
 7.309  
 7.300  
 7.294  
 7.287  
 7.284  
 7.279  
 7.275  
 7.134  
 7.129  
 7.118  
 7.114  
 7.110  
 6.996  
 6.992  
 6.987  
 6.979  
 6.975  
 6.972  
 6.966  
 3.670  
 2.413  
 1.918

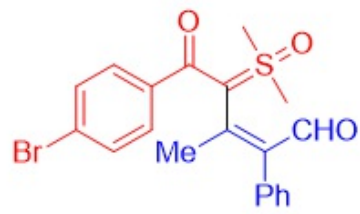

Z/E = 10:1  
 3ka  
 400 MHz, CDCl<sub>3</sub>

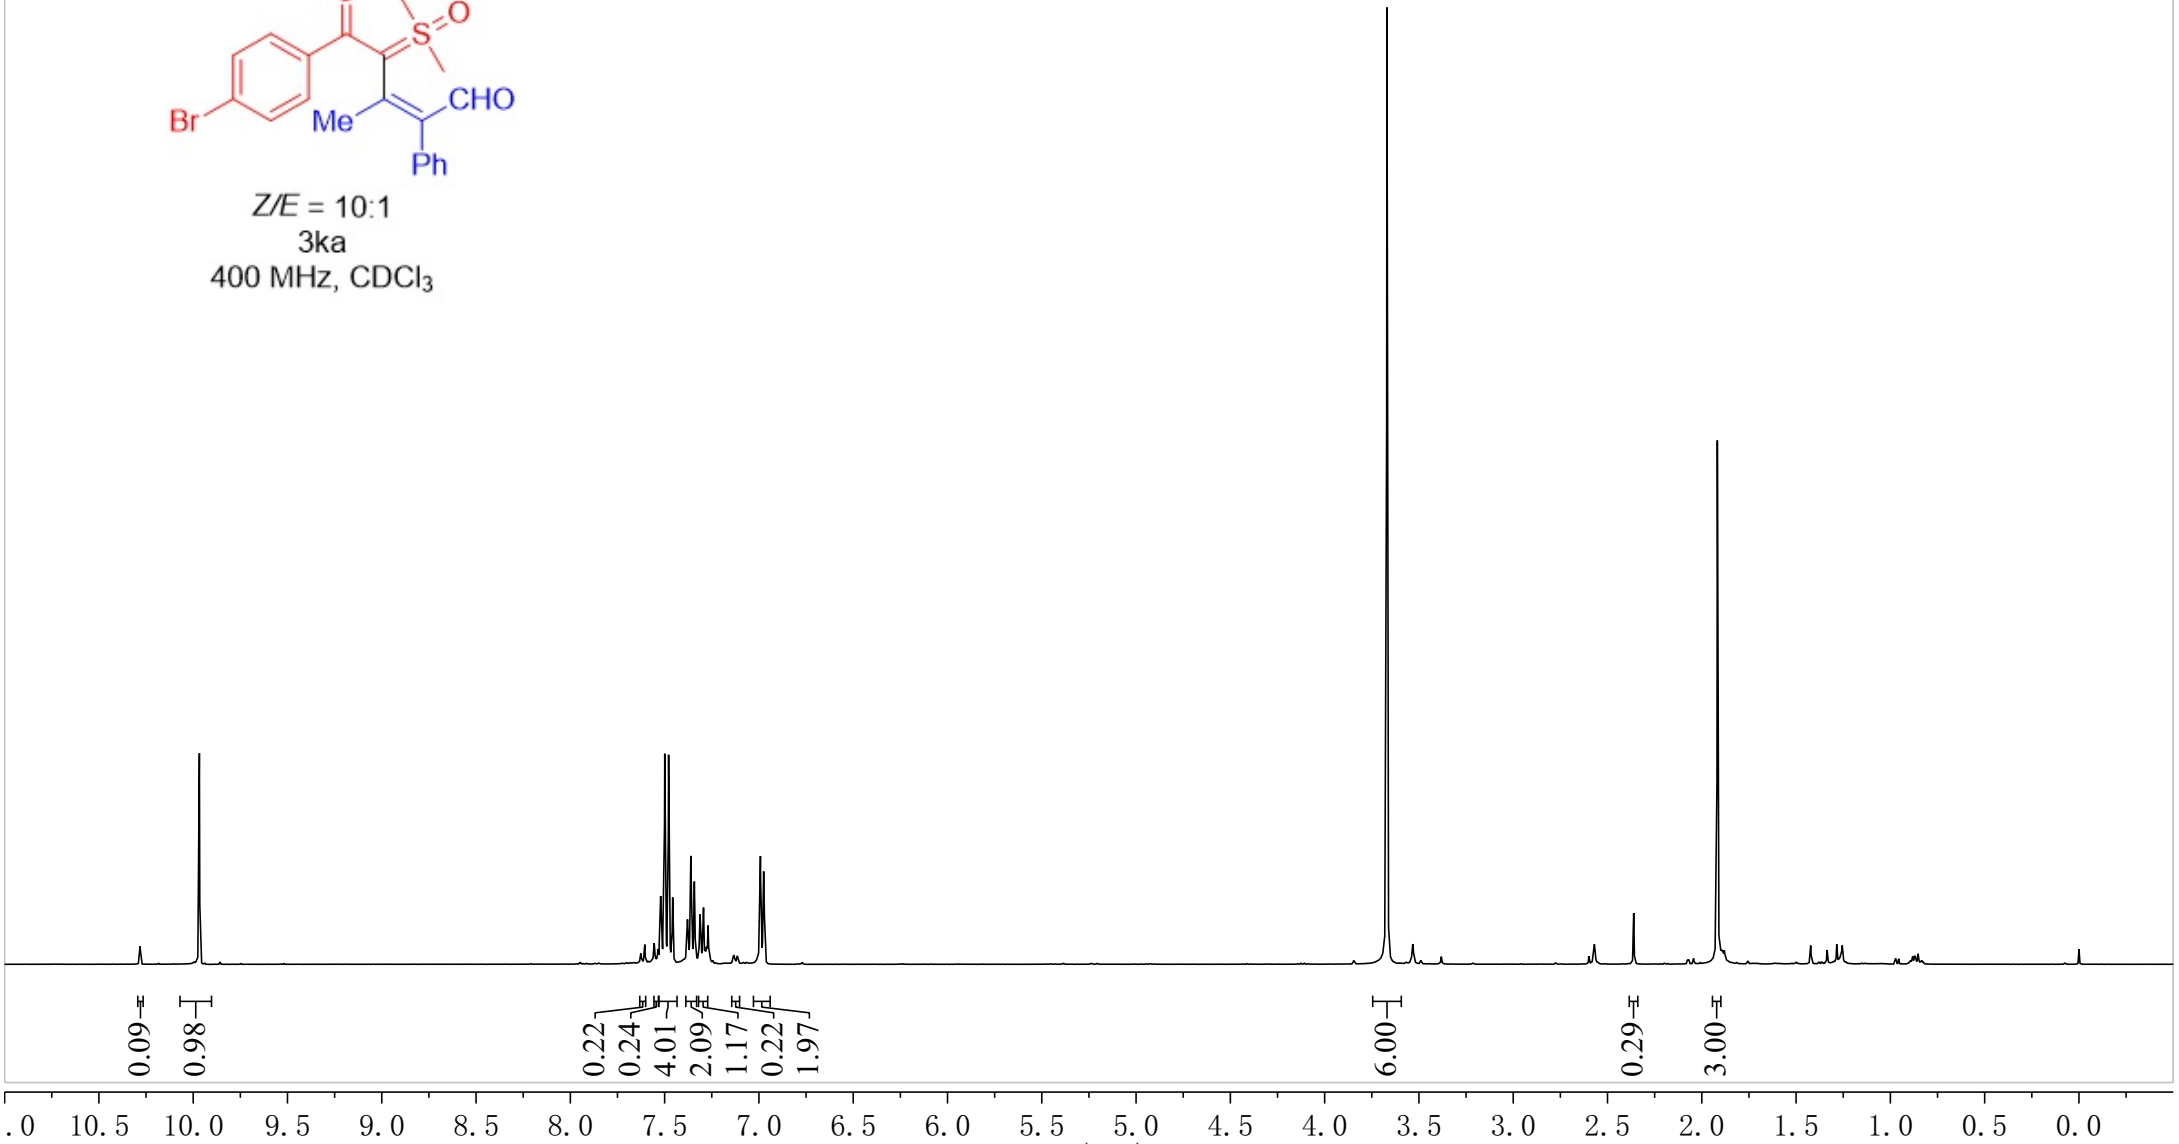

0.09  
 0.98

0.22  
 0.24  
 4.01  
 2.09  
 1.17  
 0.22  
 1.97

6.00

0.29

3.00

f1 (ppm)  
 S98

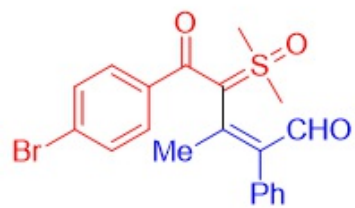

3ka  
101 MHz, CDCl<sub>3</sub>

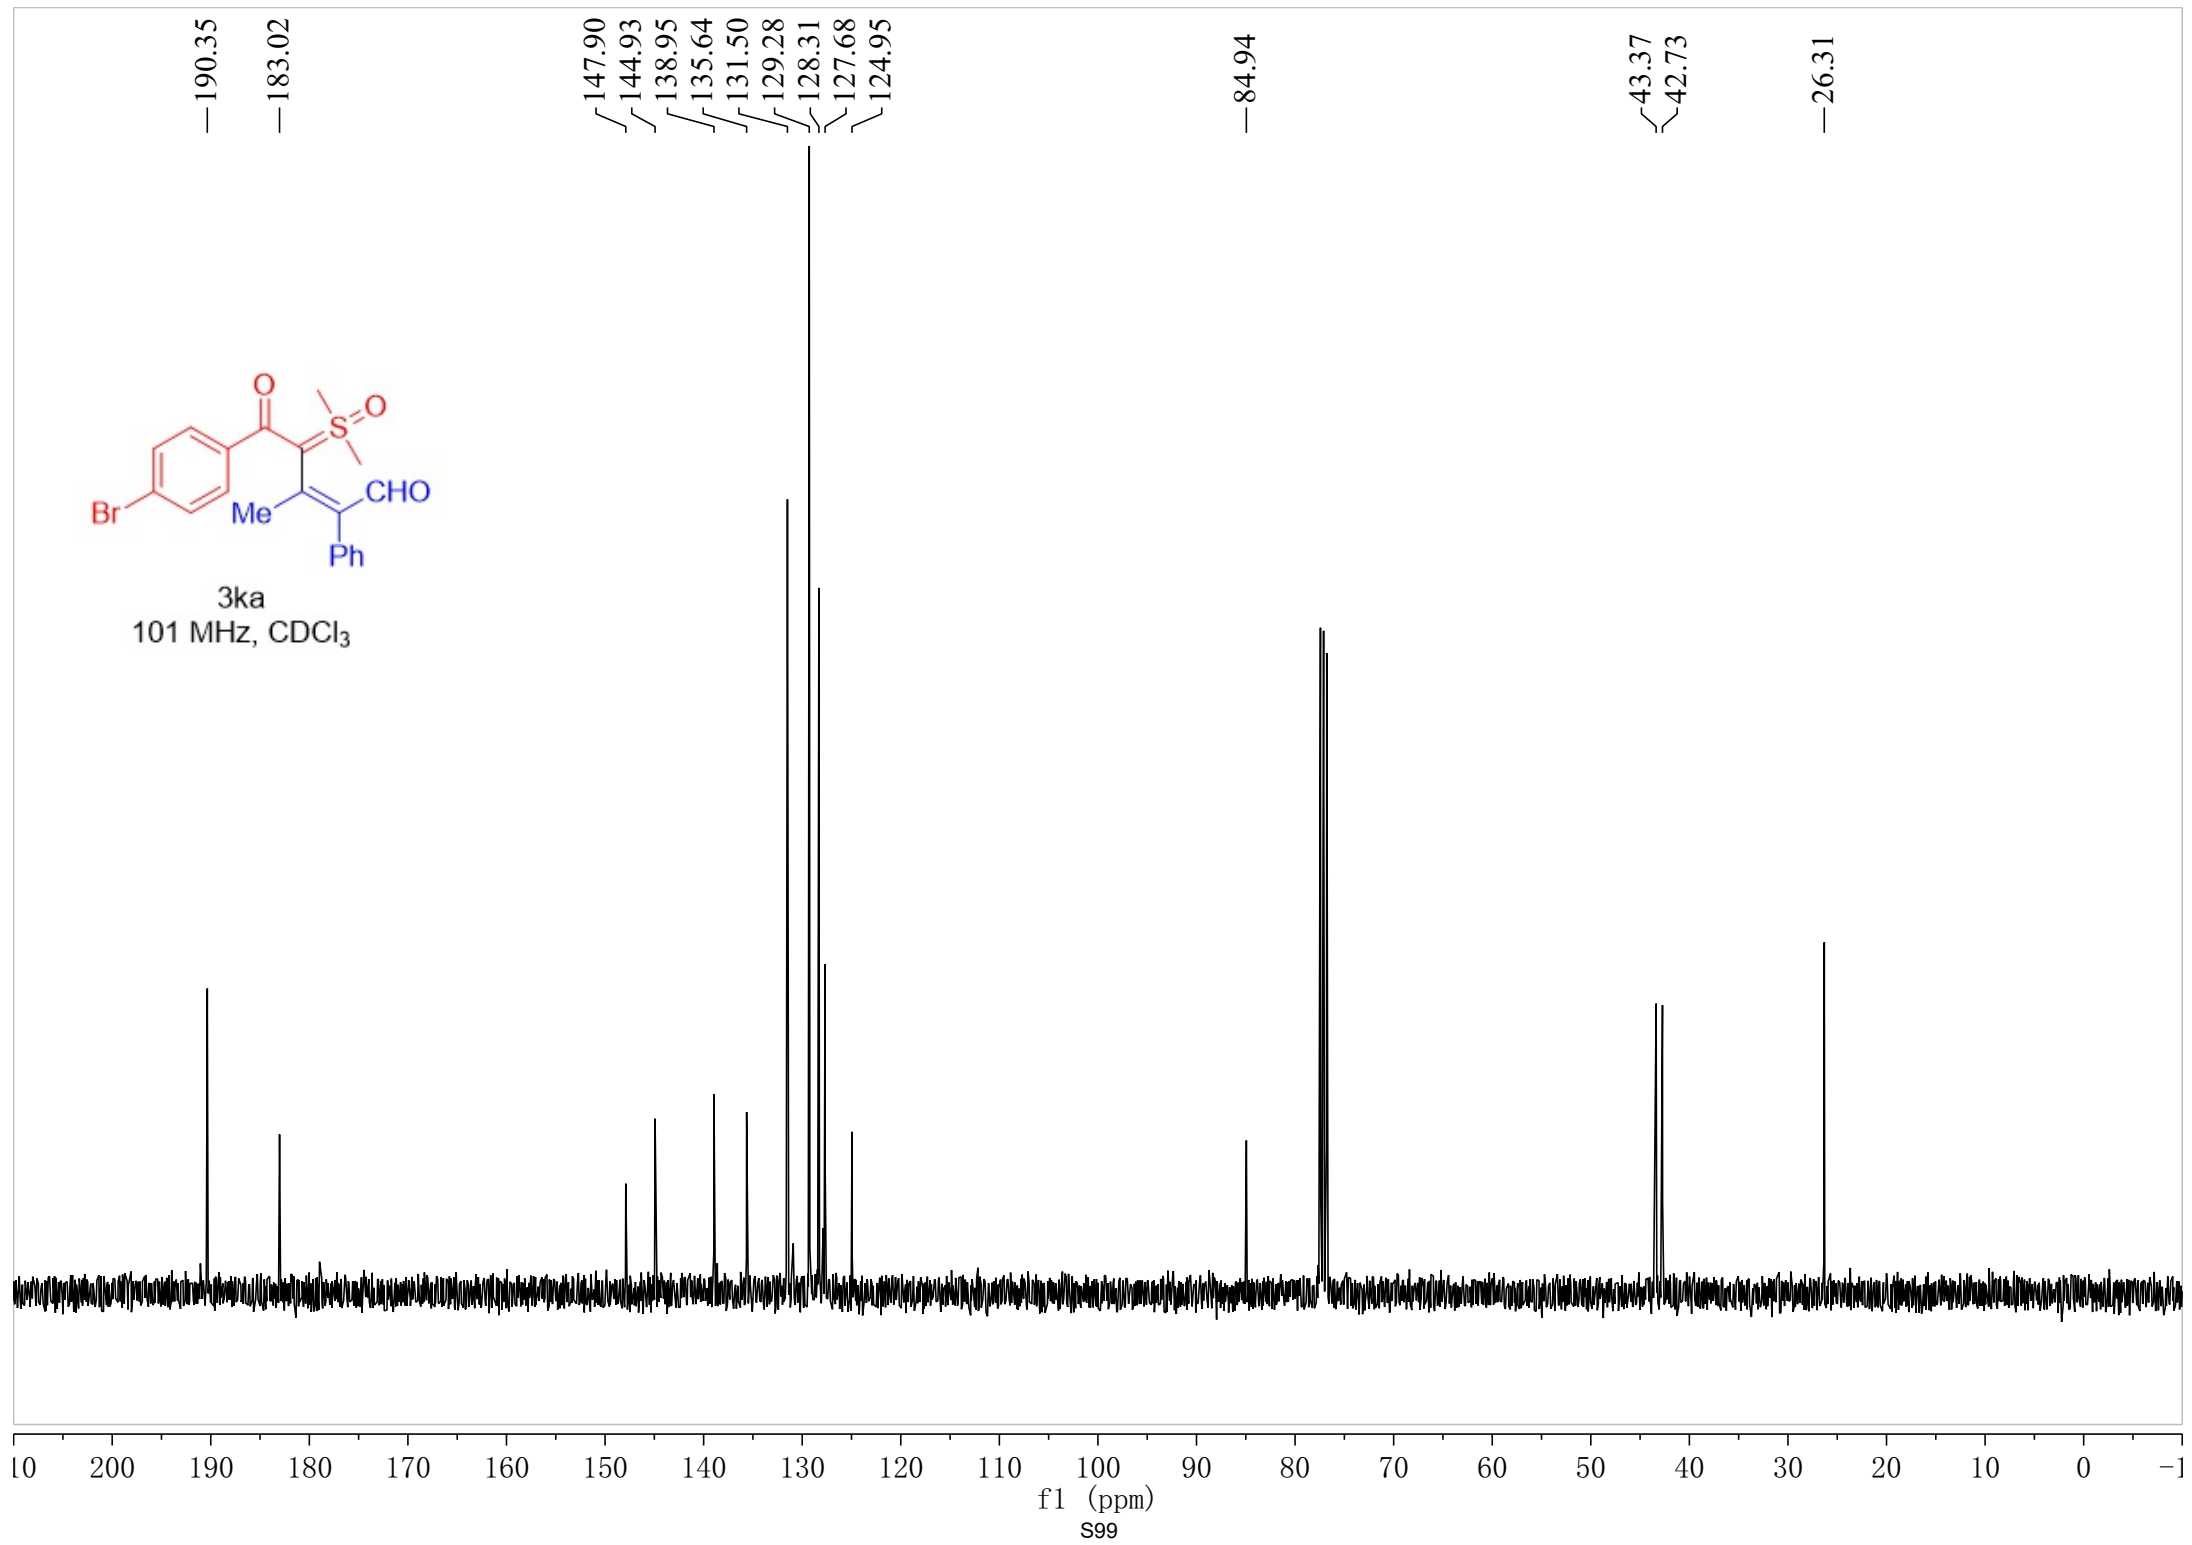

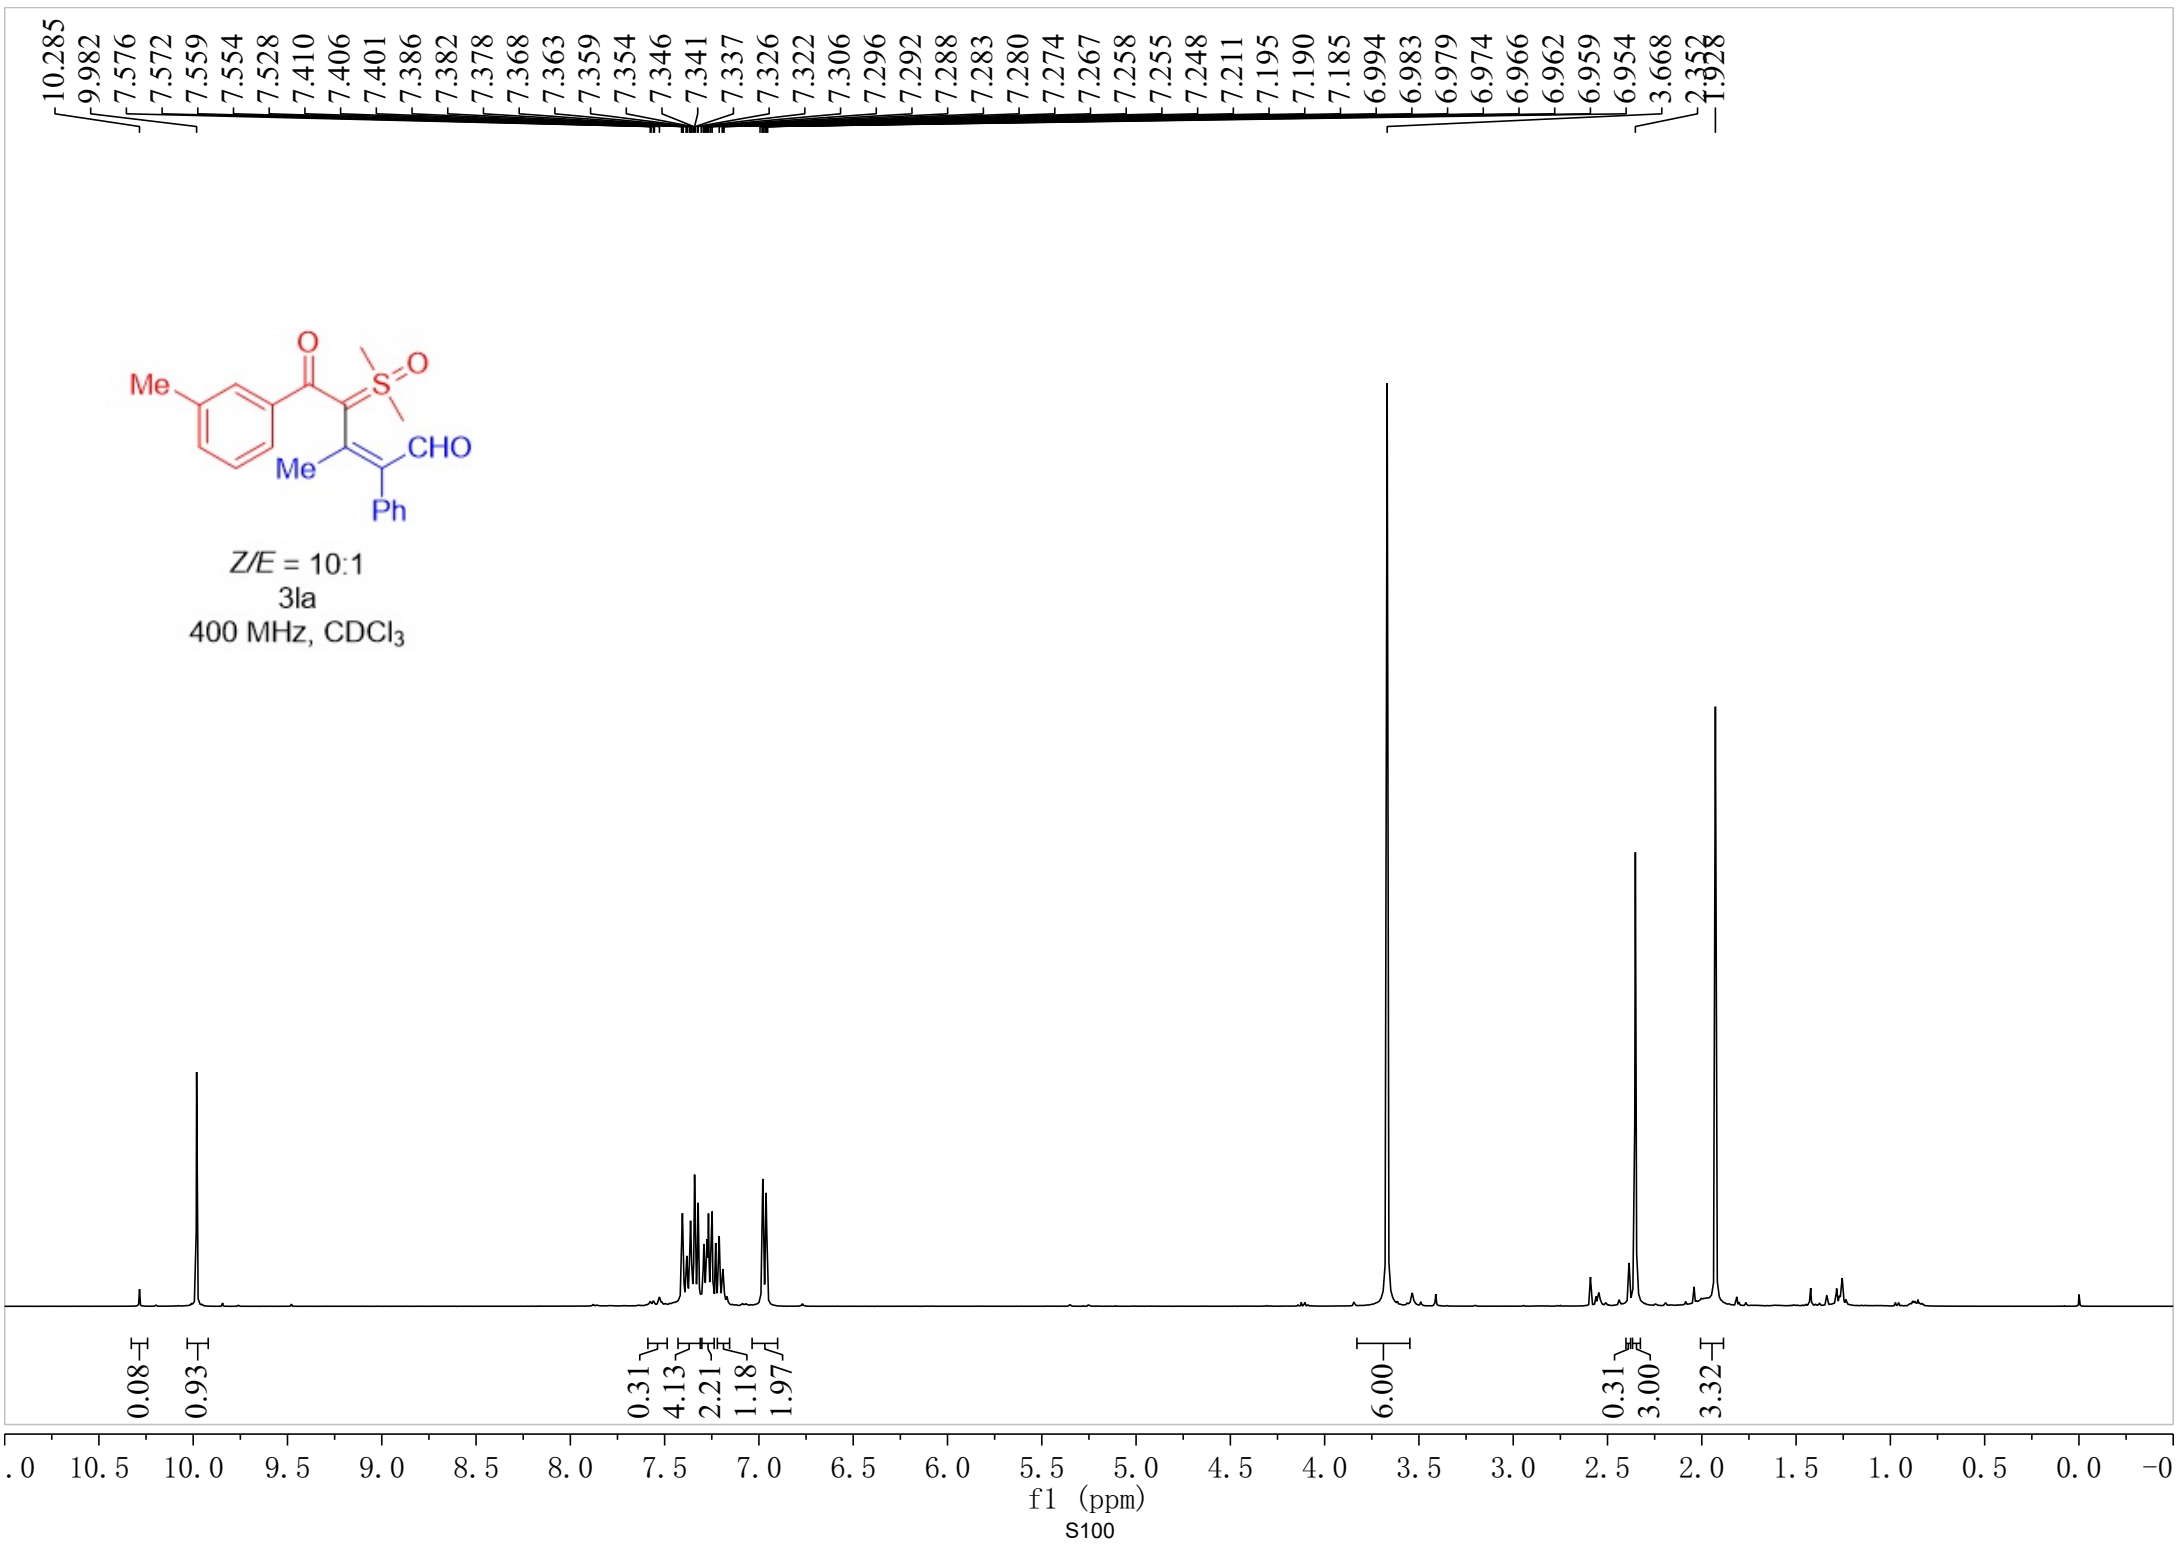

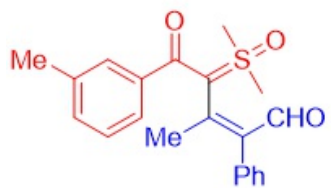

3a  
101 MHz, CDCl<sub>3</sub>

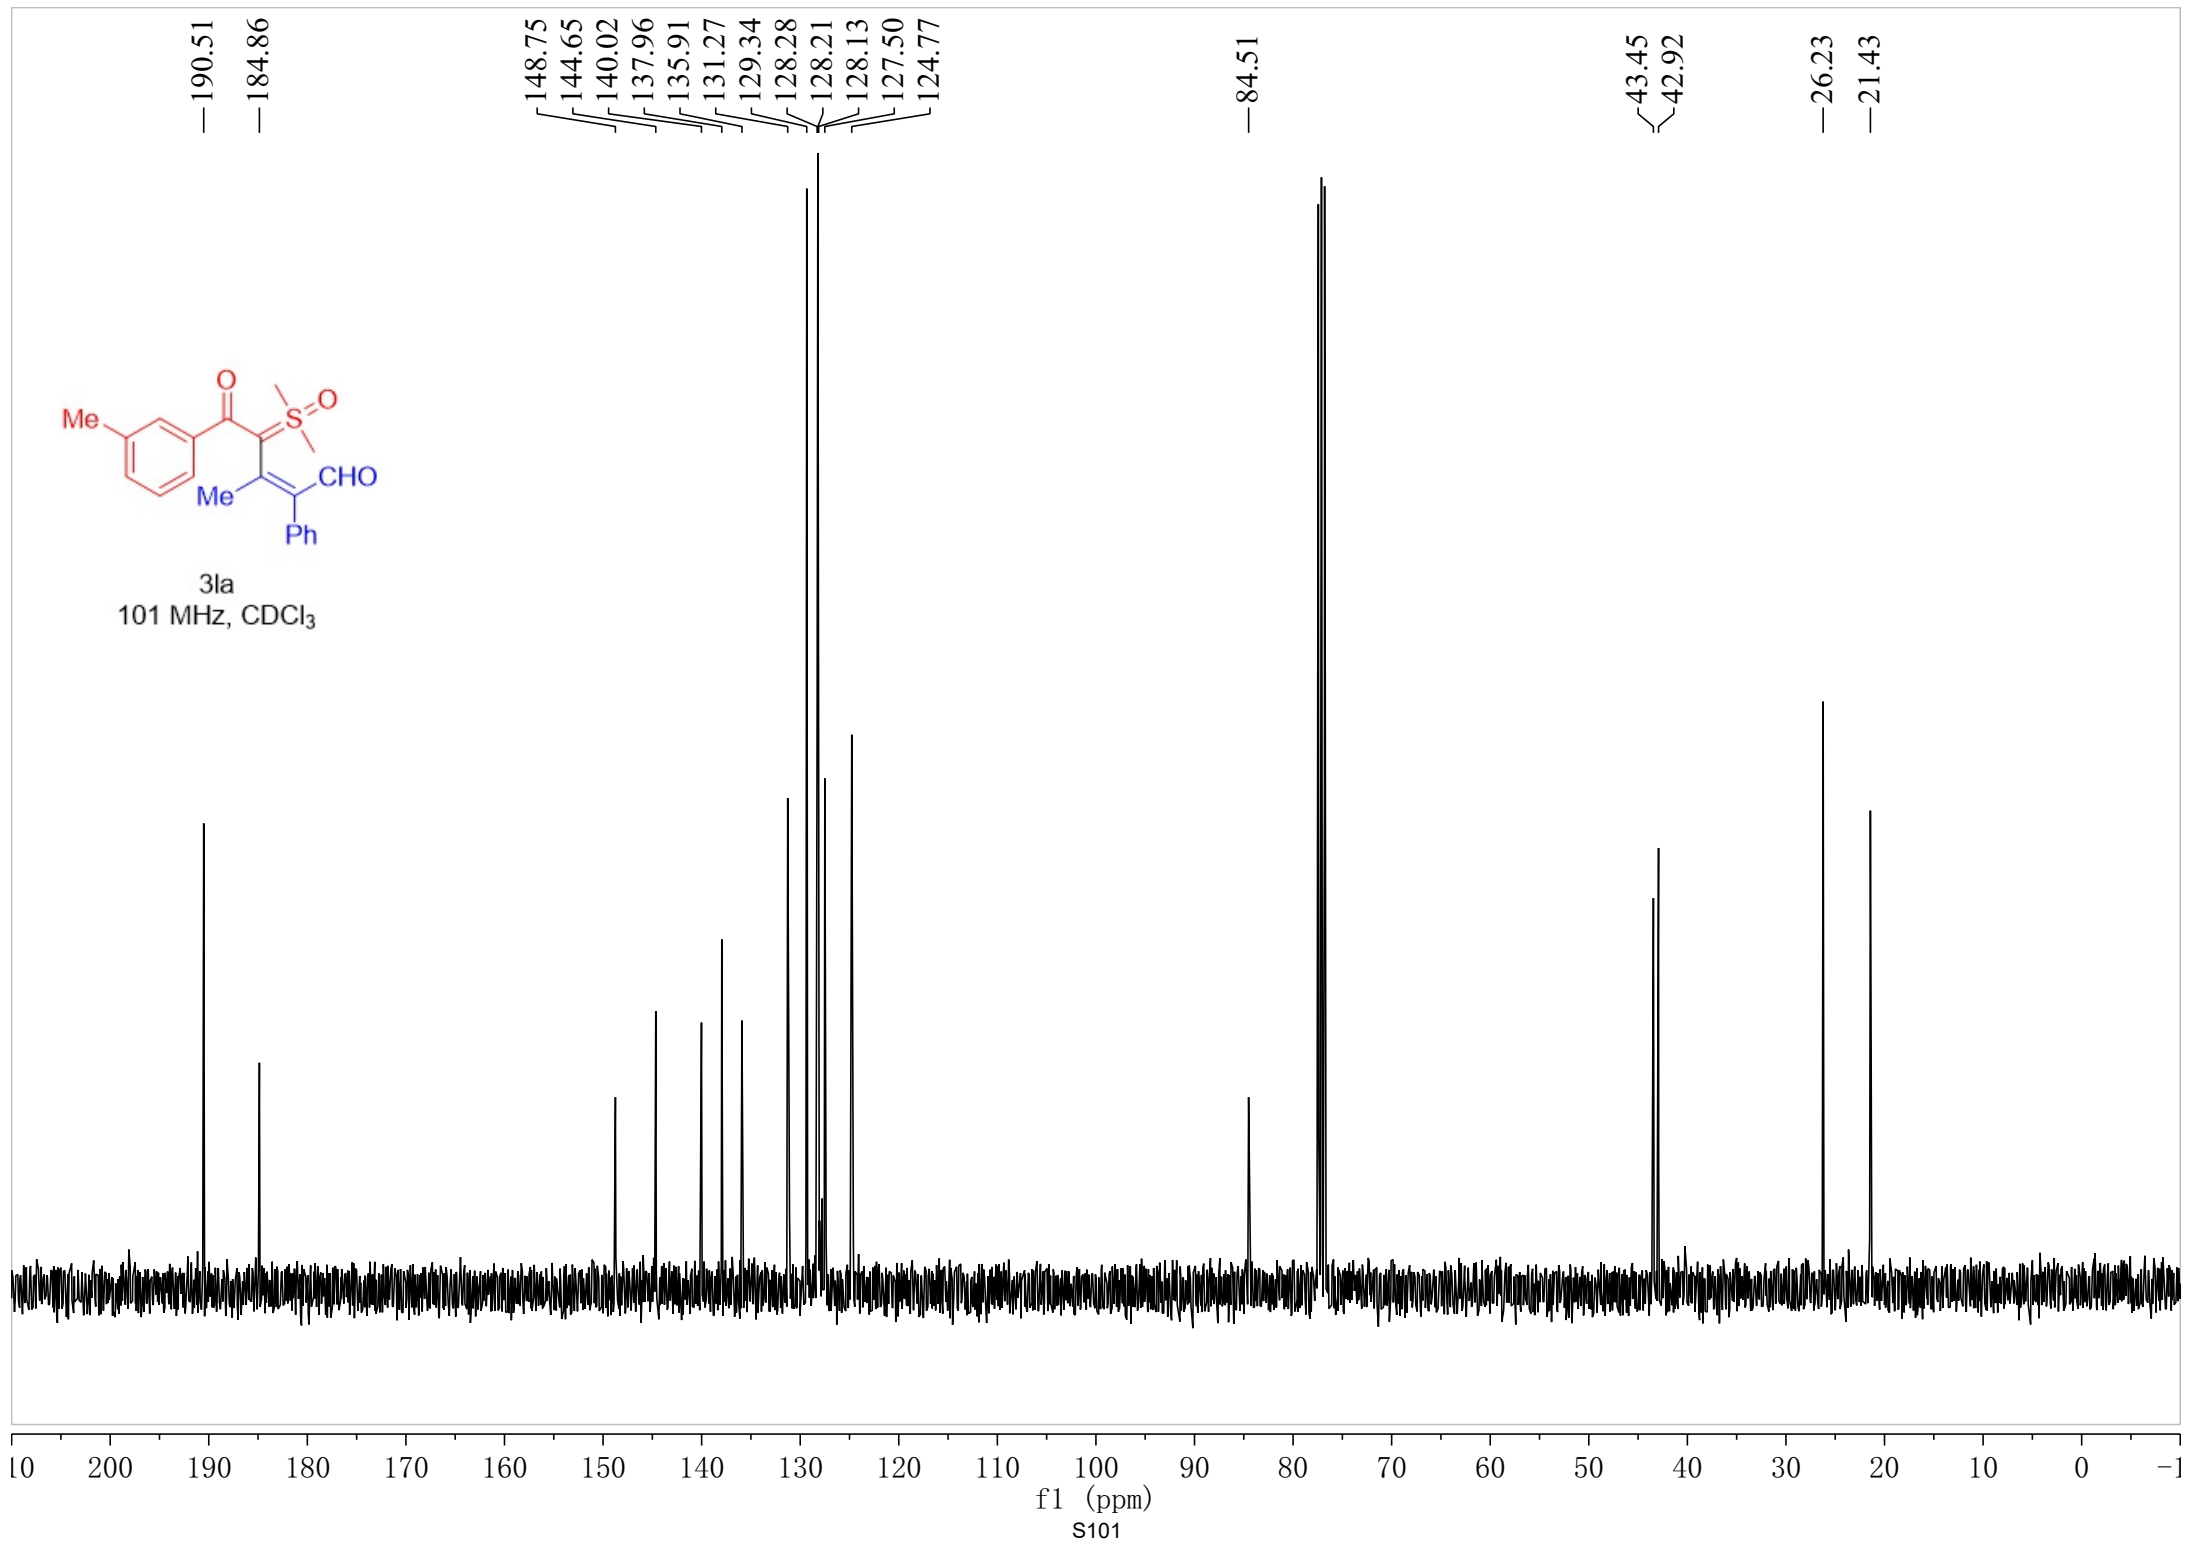

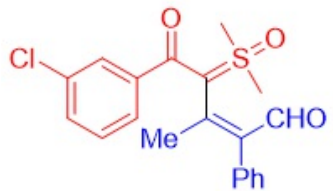

3ma  
400 MHz, (CD<sub>3</sub>)<sub>2</sub>SO

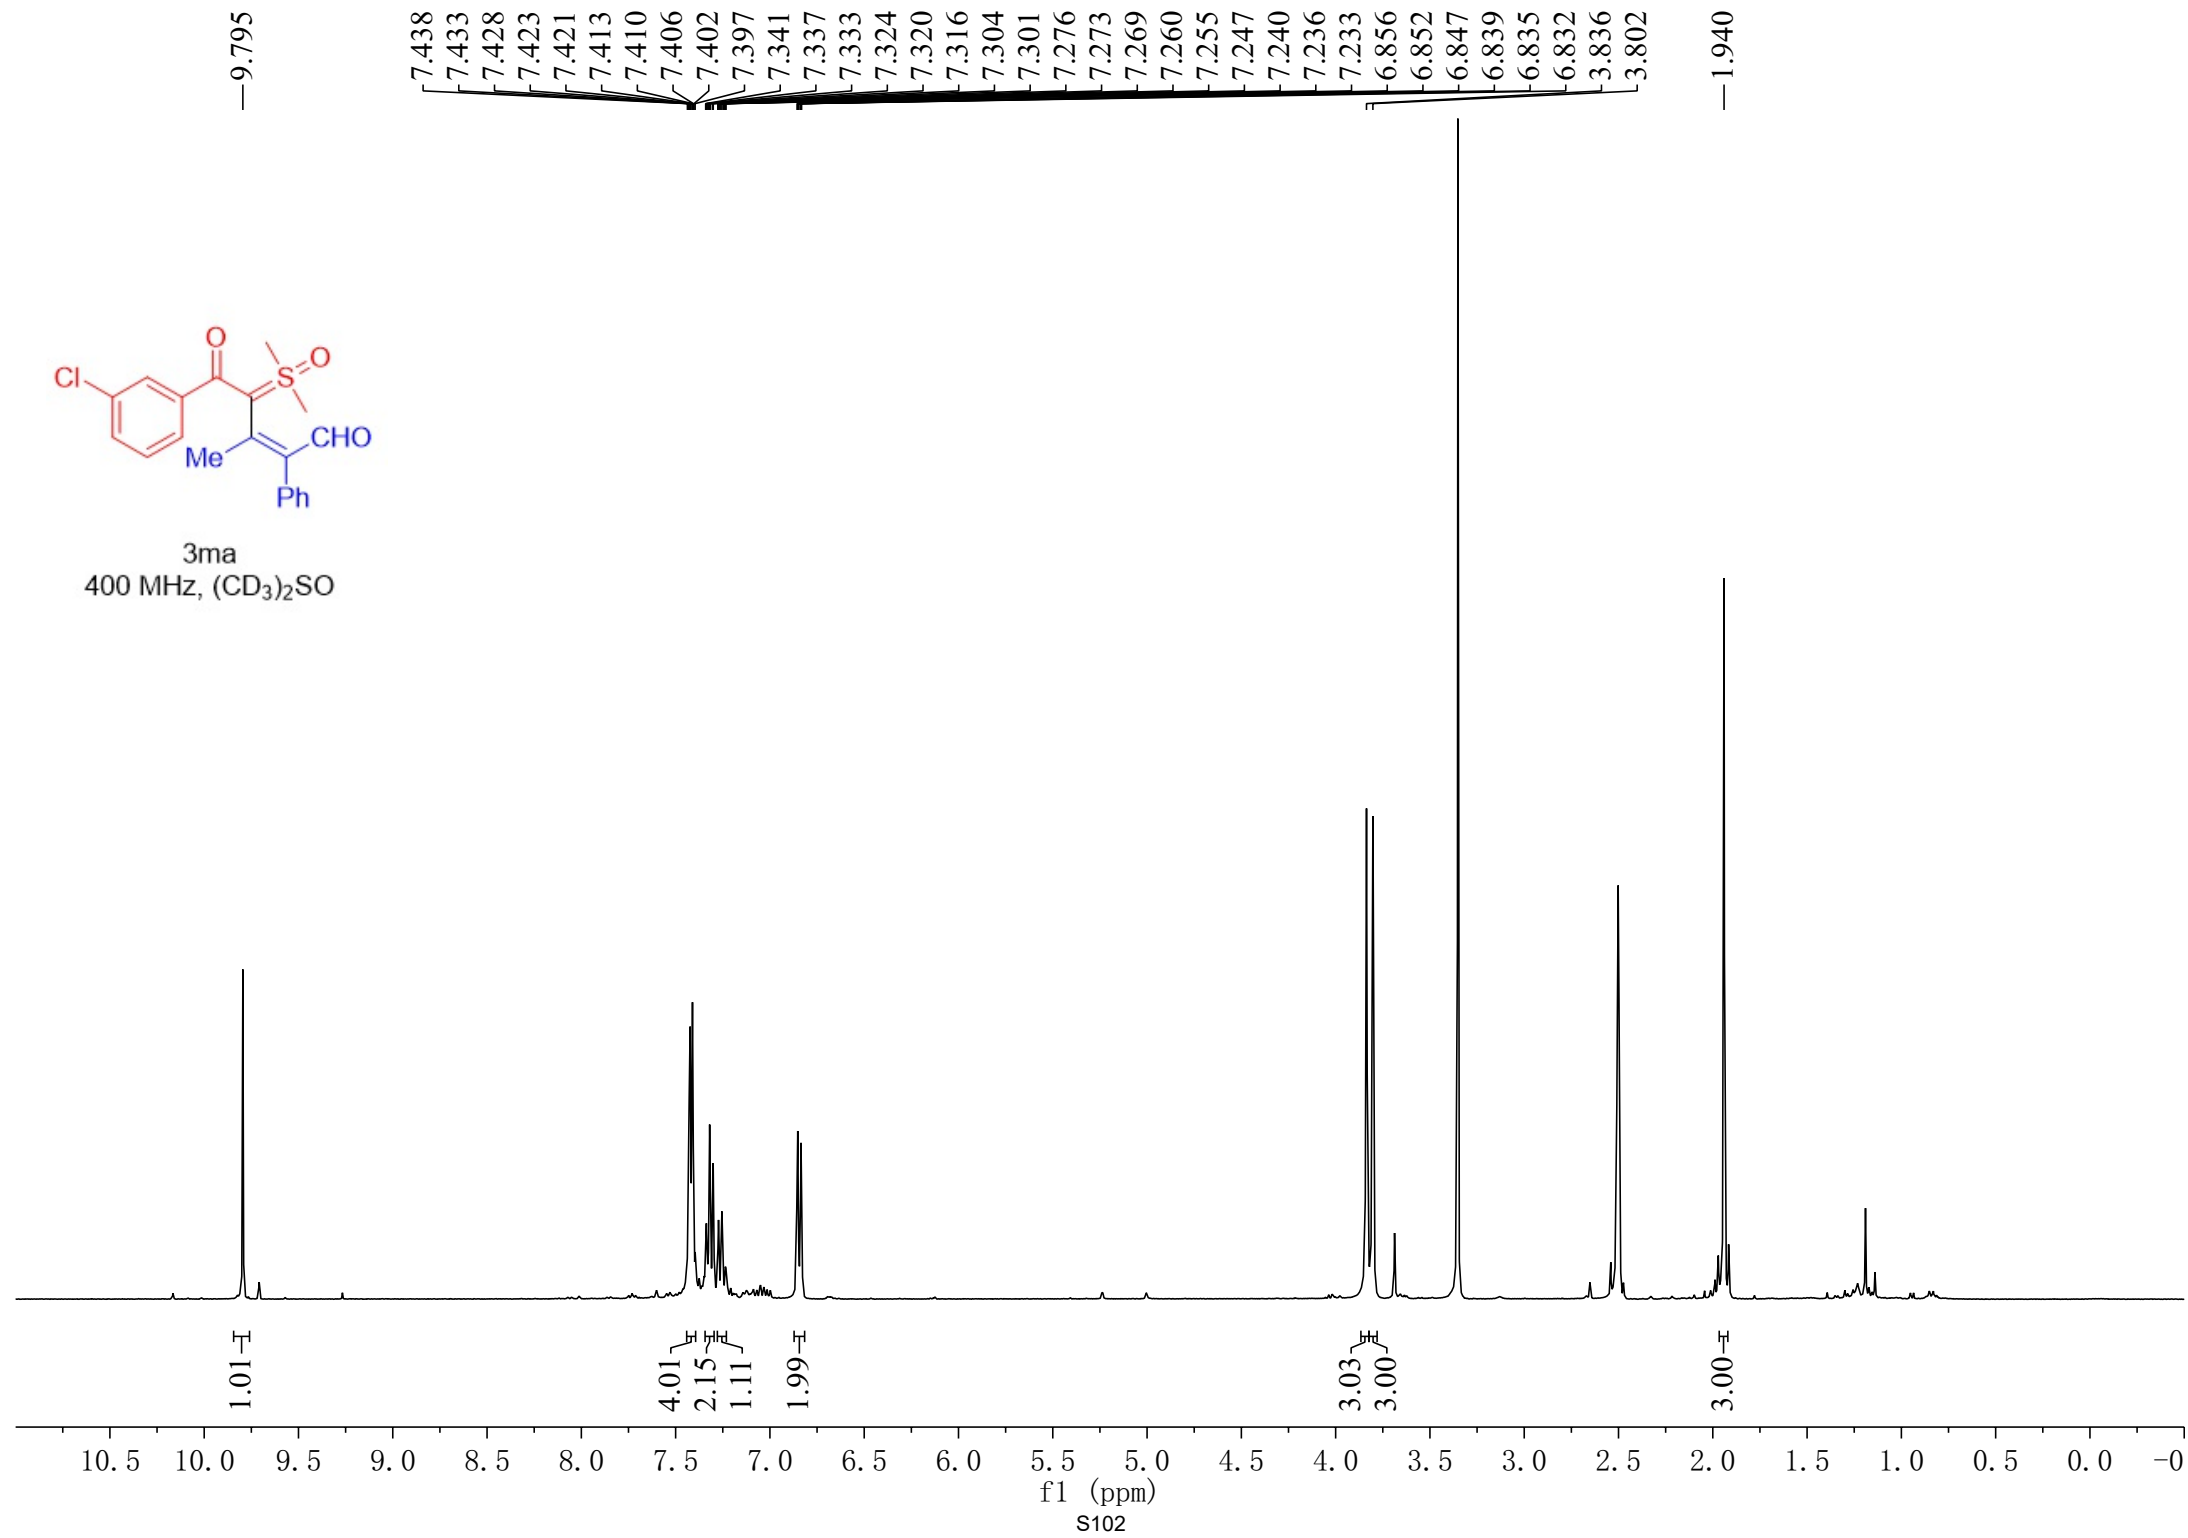

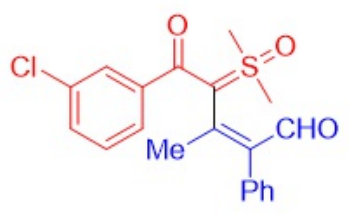

3ma  
101 MHz, CDCl<sub>3</sub>

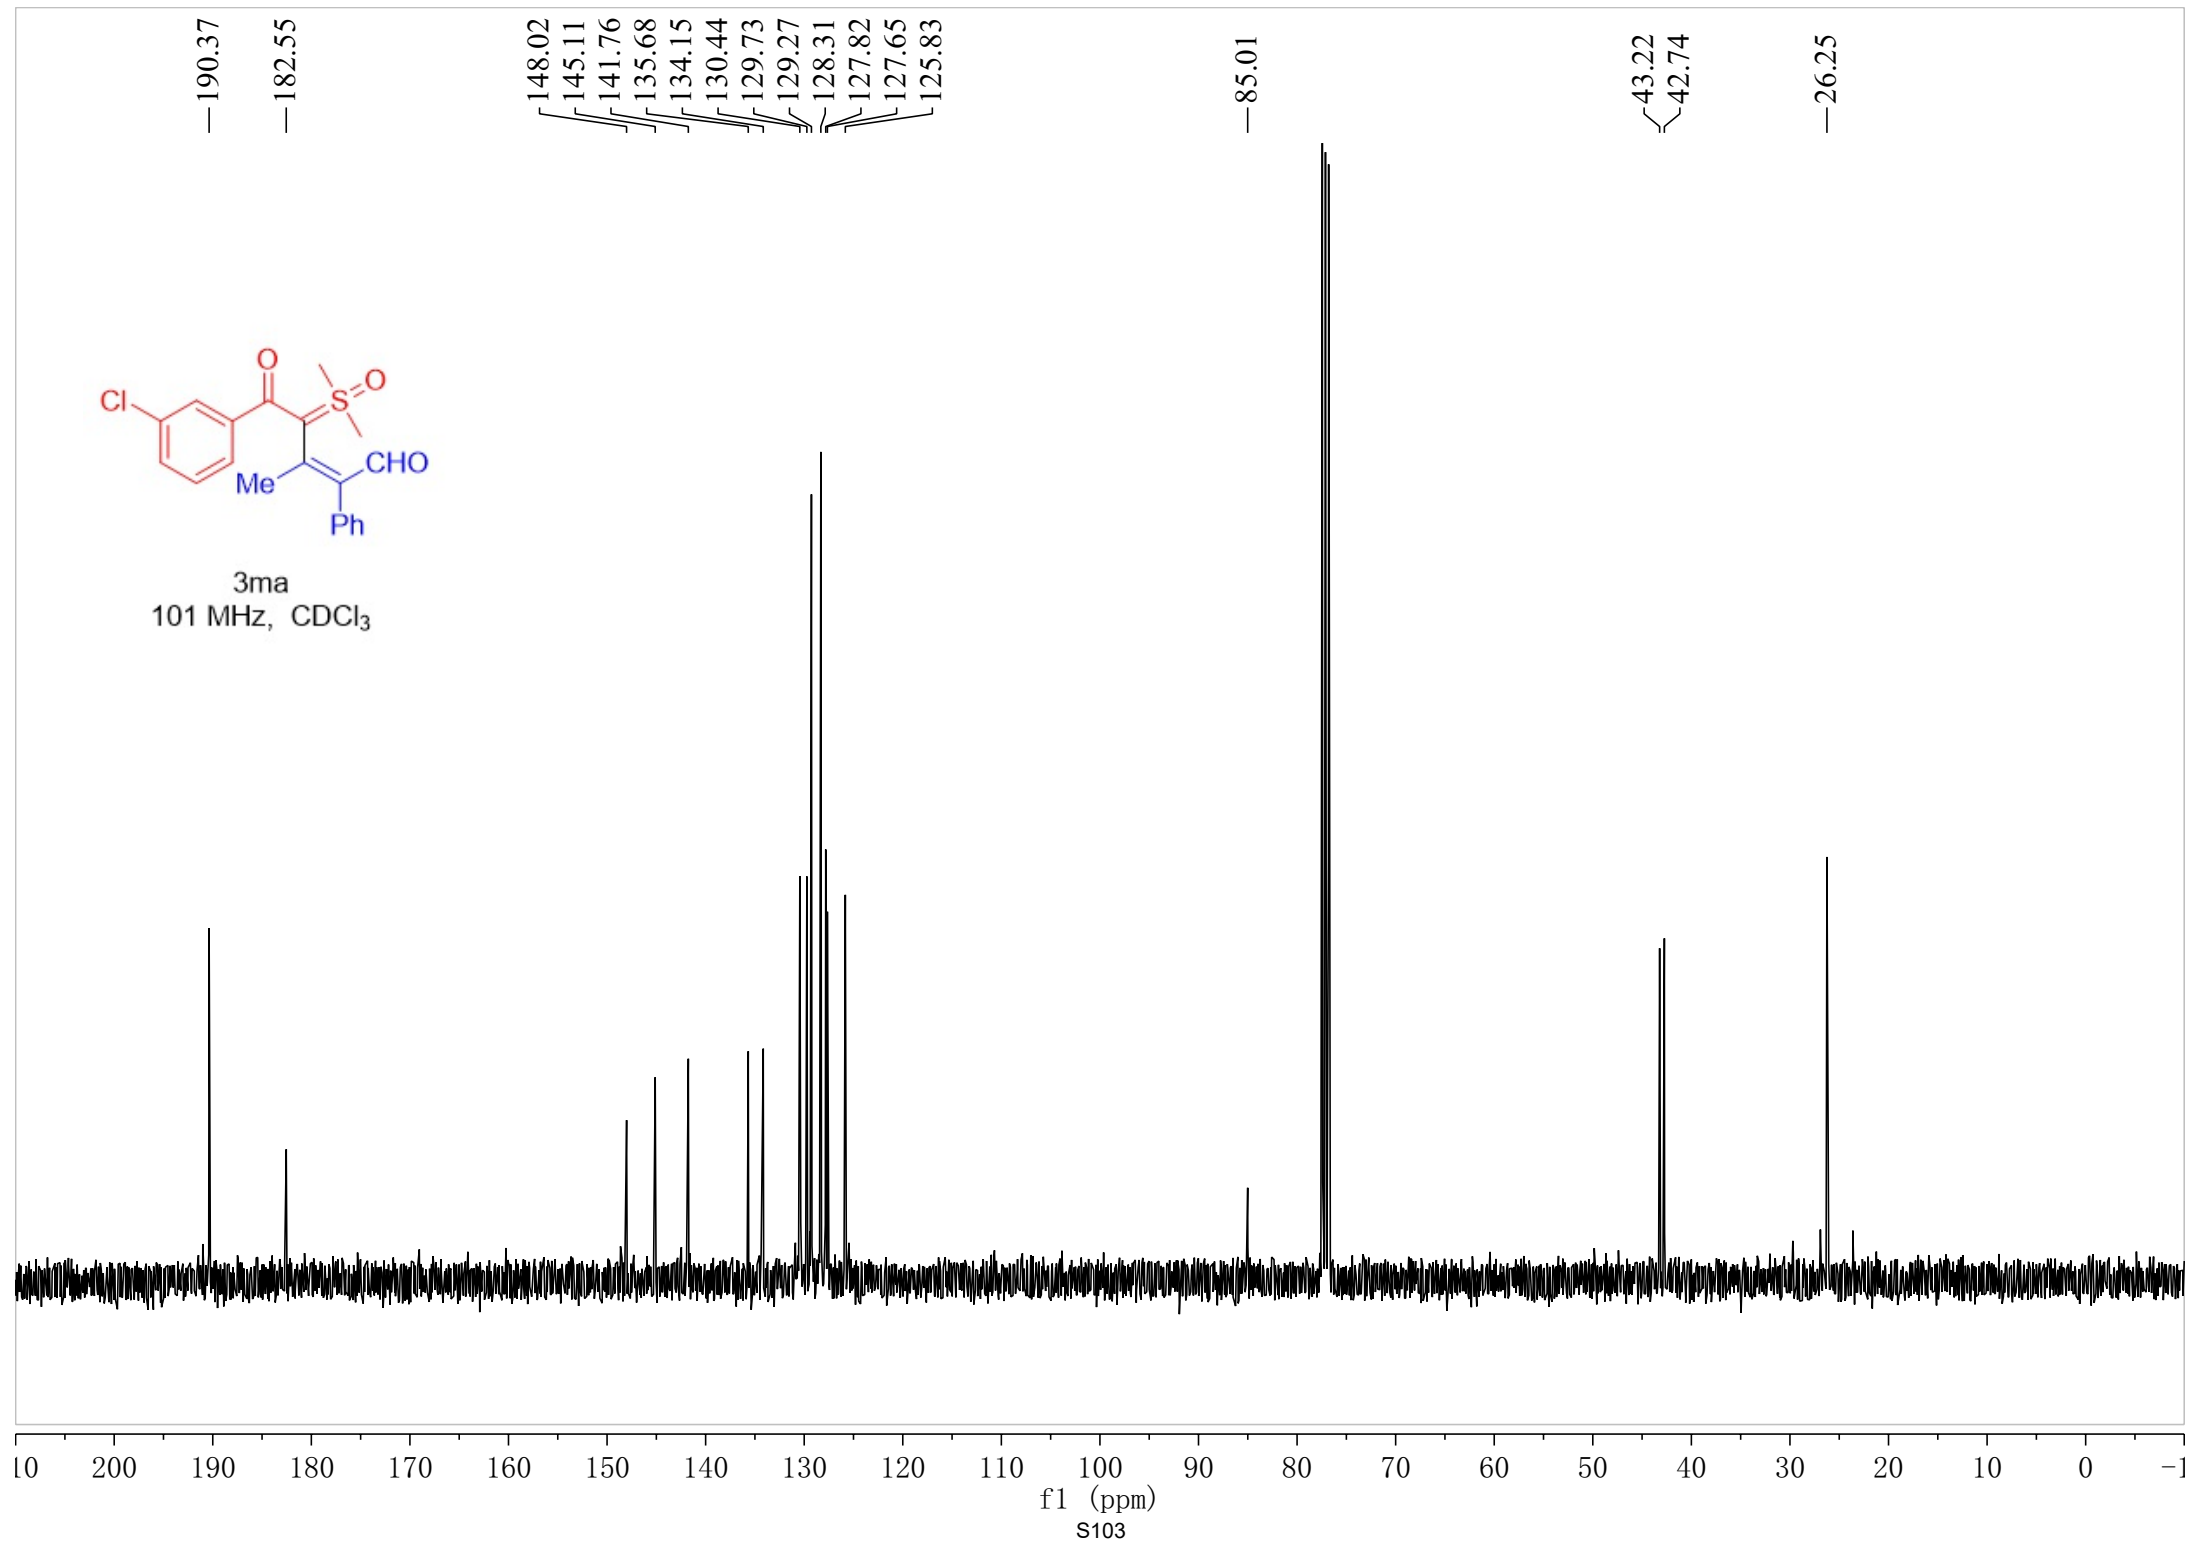

9.872  
7.276  
7.272  
7.255  
7.250  
7.237  
7.226  
7.222  
7.219  
7.212  
7.205  
7.197  
7.191  
7.185  
7.182  
7.176  
7.144  
7.139  
7.133  
7.130  
7.117  
6.671  
6.667  
6.655  
6.651  
6.647

3.851  
3.819

2.274

1.855

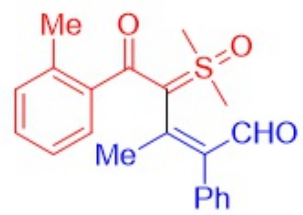

3na  
400 MHz, (CD<sub>3</sub>)<sub>2</sub>SO

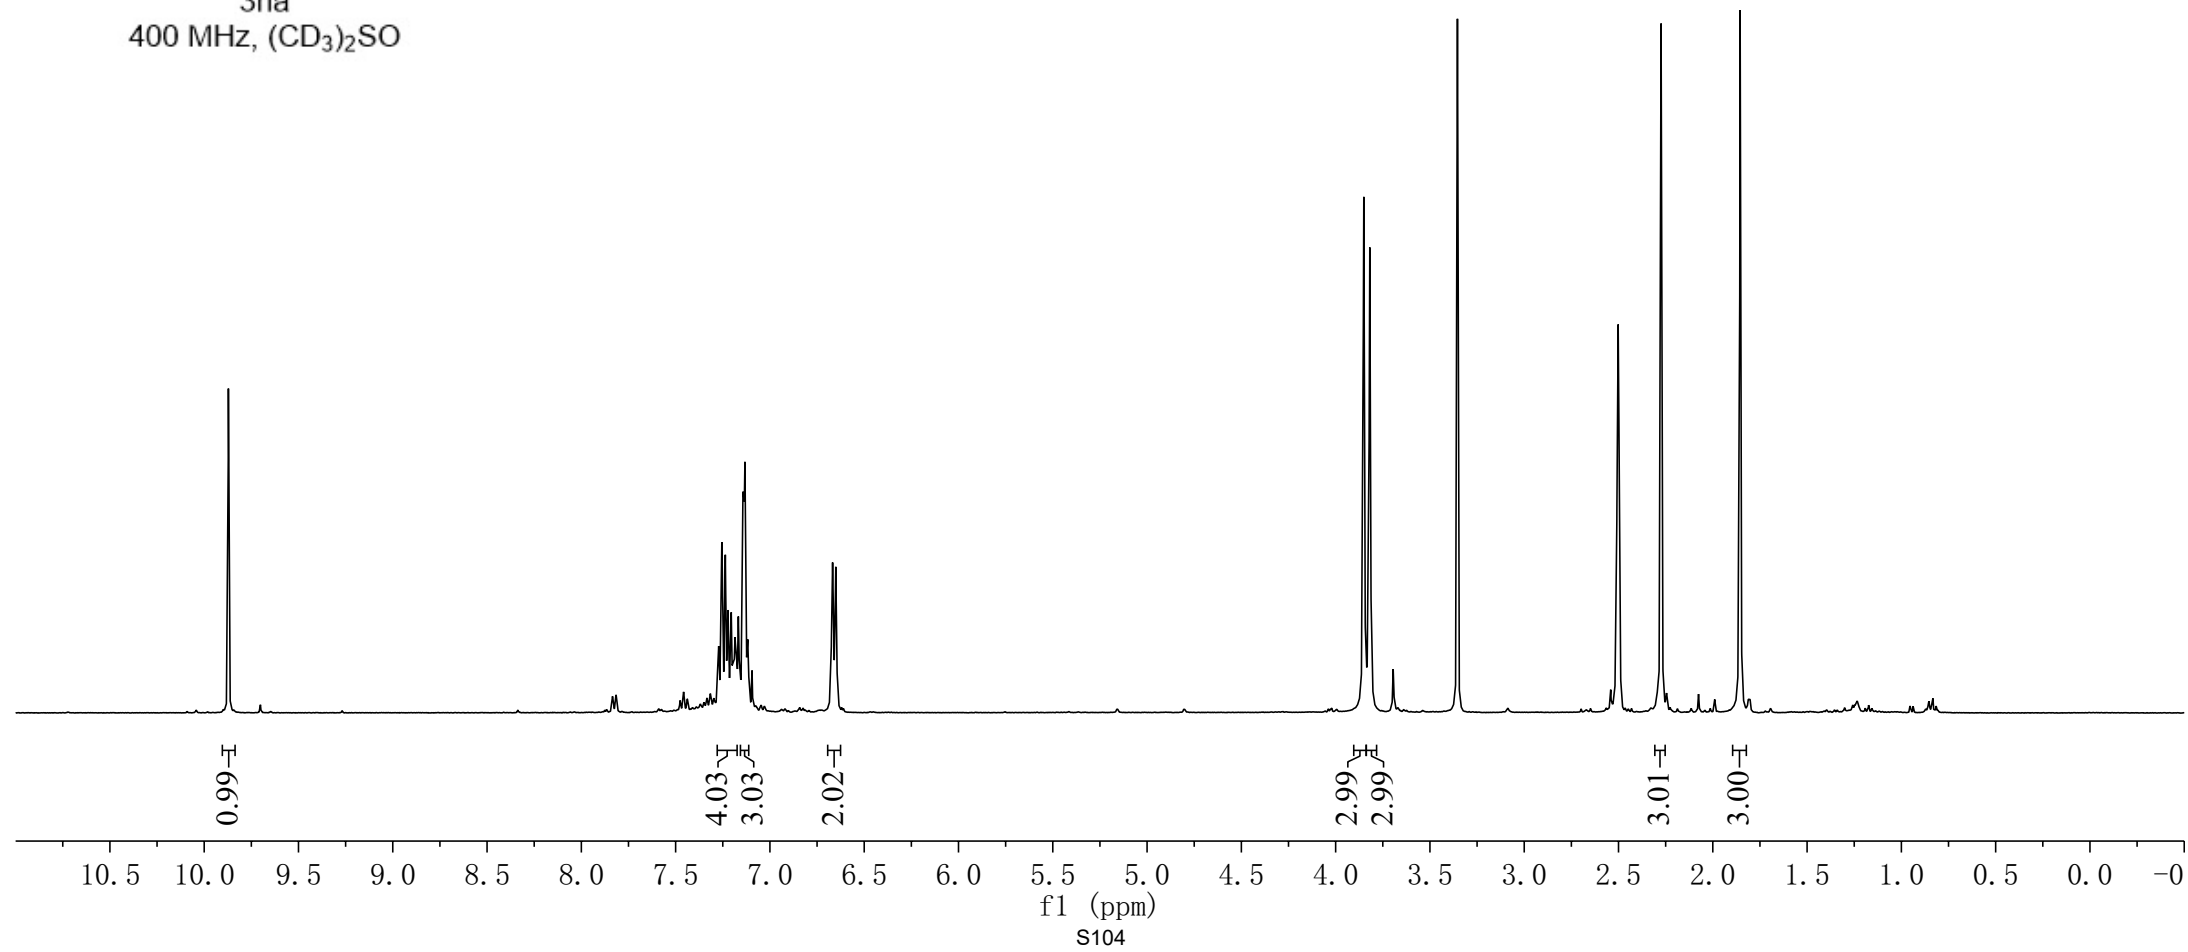

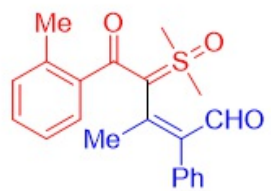

3na  
101 MHz, CDCl<sub>3</sub>

190.334  
186.652  
148.571  
145.038  
140.063  
135.819  
135.616  
131.127  
129.329  
129.112  
128.123  
127.419  
126.937  
125.244

86.205

43.133  
43.076

25.692  
19.554

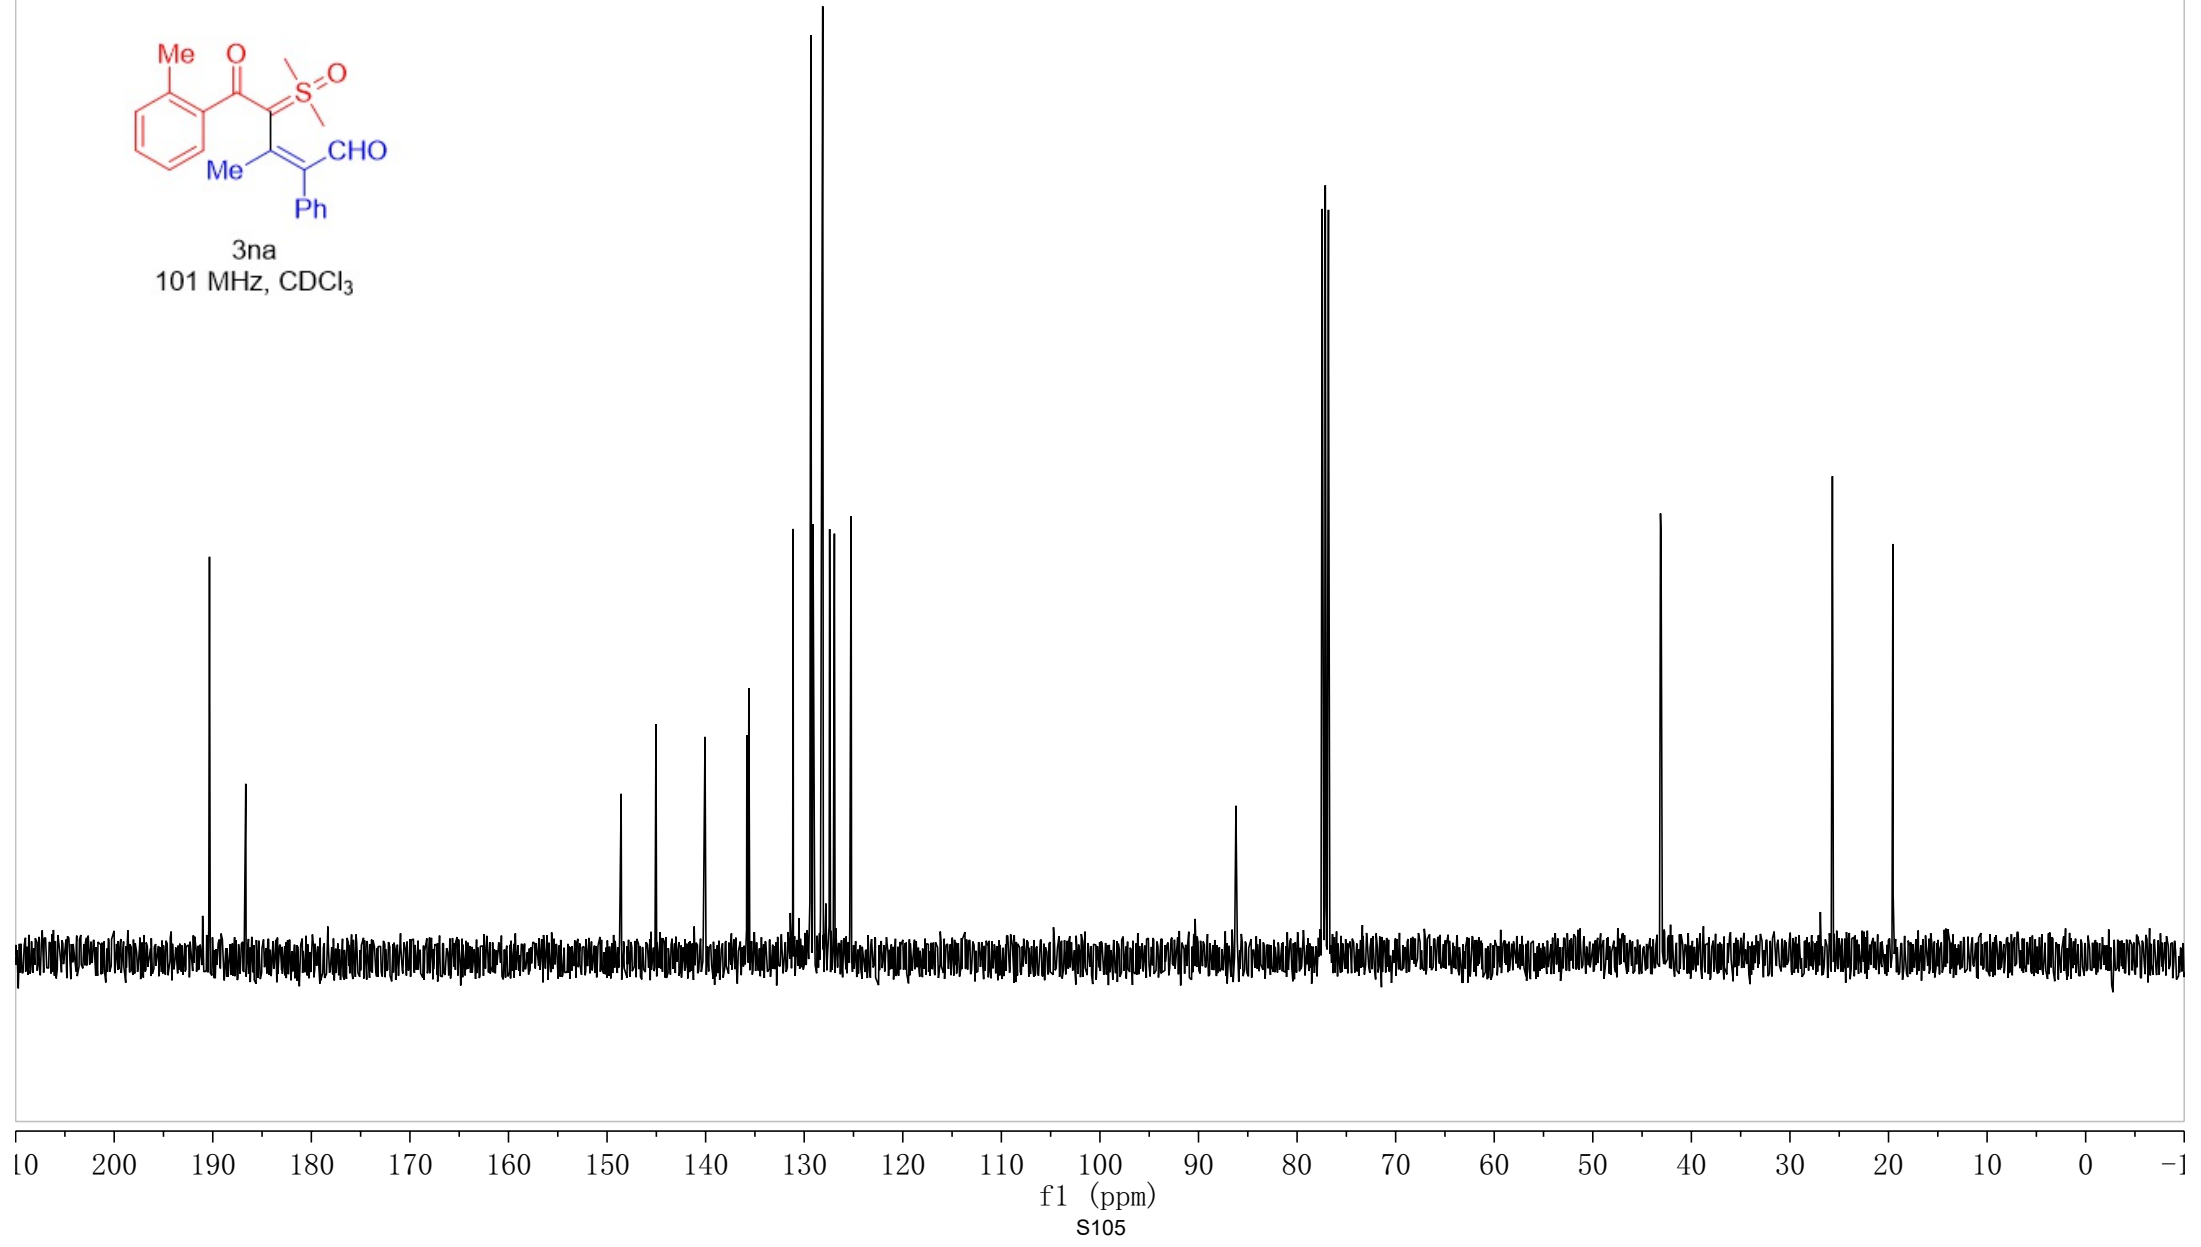

~10.151  
~10.035

7.373  
7.364  
7.354  
7.297  
7.292  
7.276  
7.257  
7.251  
7.247  
7.242  
7.232  
6.760  
6.742

3.733  
3.713

1.941

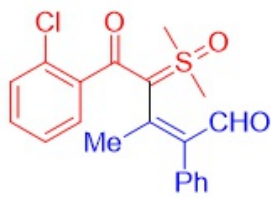

Z/E = 14:1  
3oa  
400 MHz, CDCl<sub>3</sub>

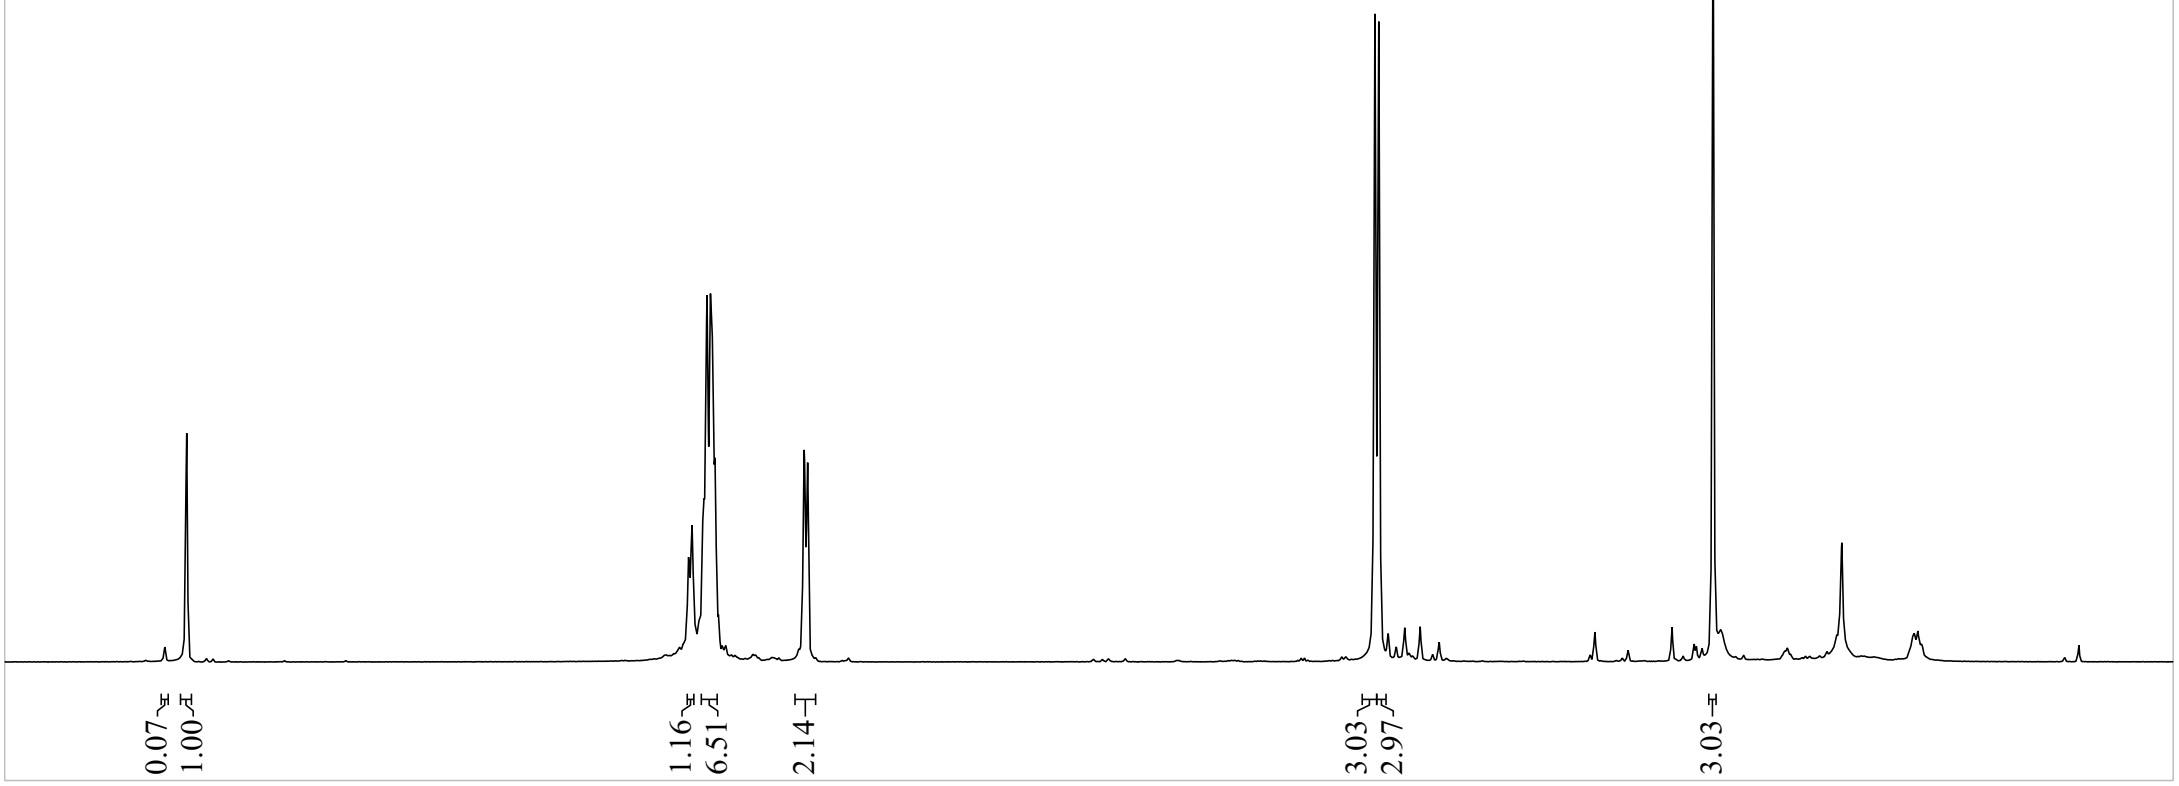

0.07  
1.00

1.16  
6.51

2.14

3.03  
2.97

3.03

10.5 10.0 9.5 9.0 8.5 8.0 7.5 7.0 6.5 6.0 5.5 5.0 4.5 4.0 3.5 3.0 2.5 2.0 1.5 1.0 0.5 0.0 -0

f1 (ppm)  
S106

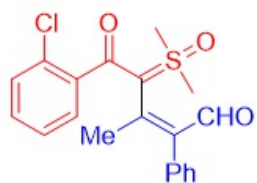

3a  
101 MHz, CDCl<sub>3</sub>

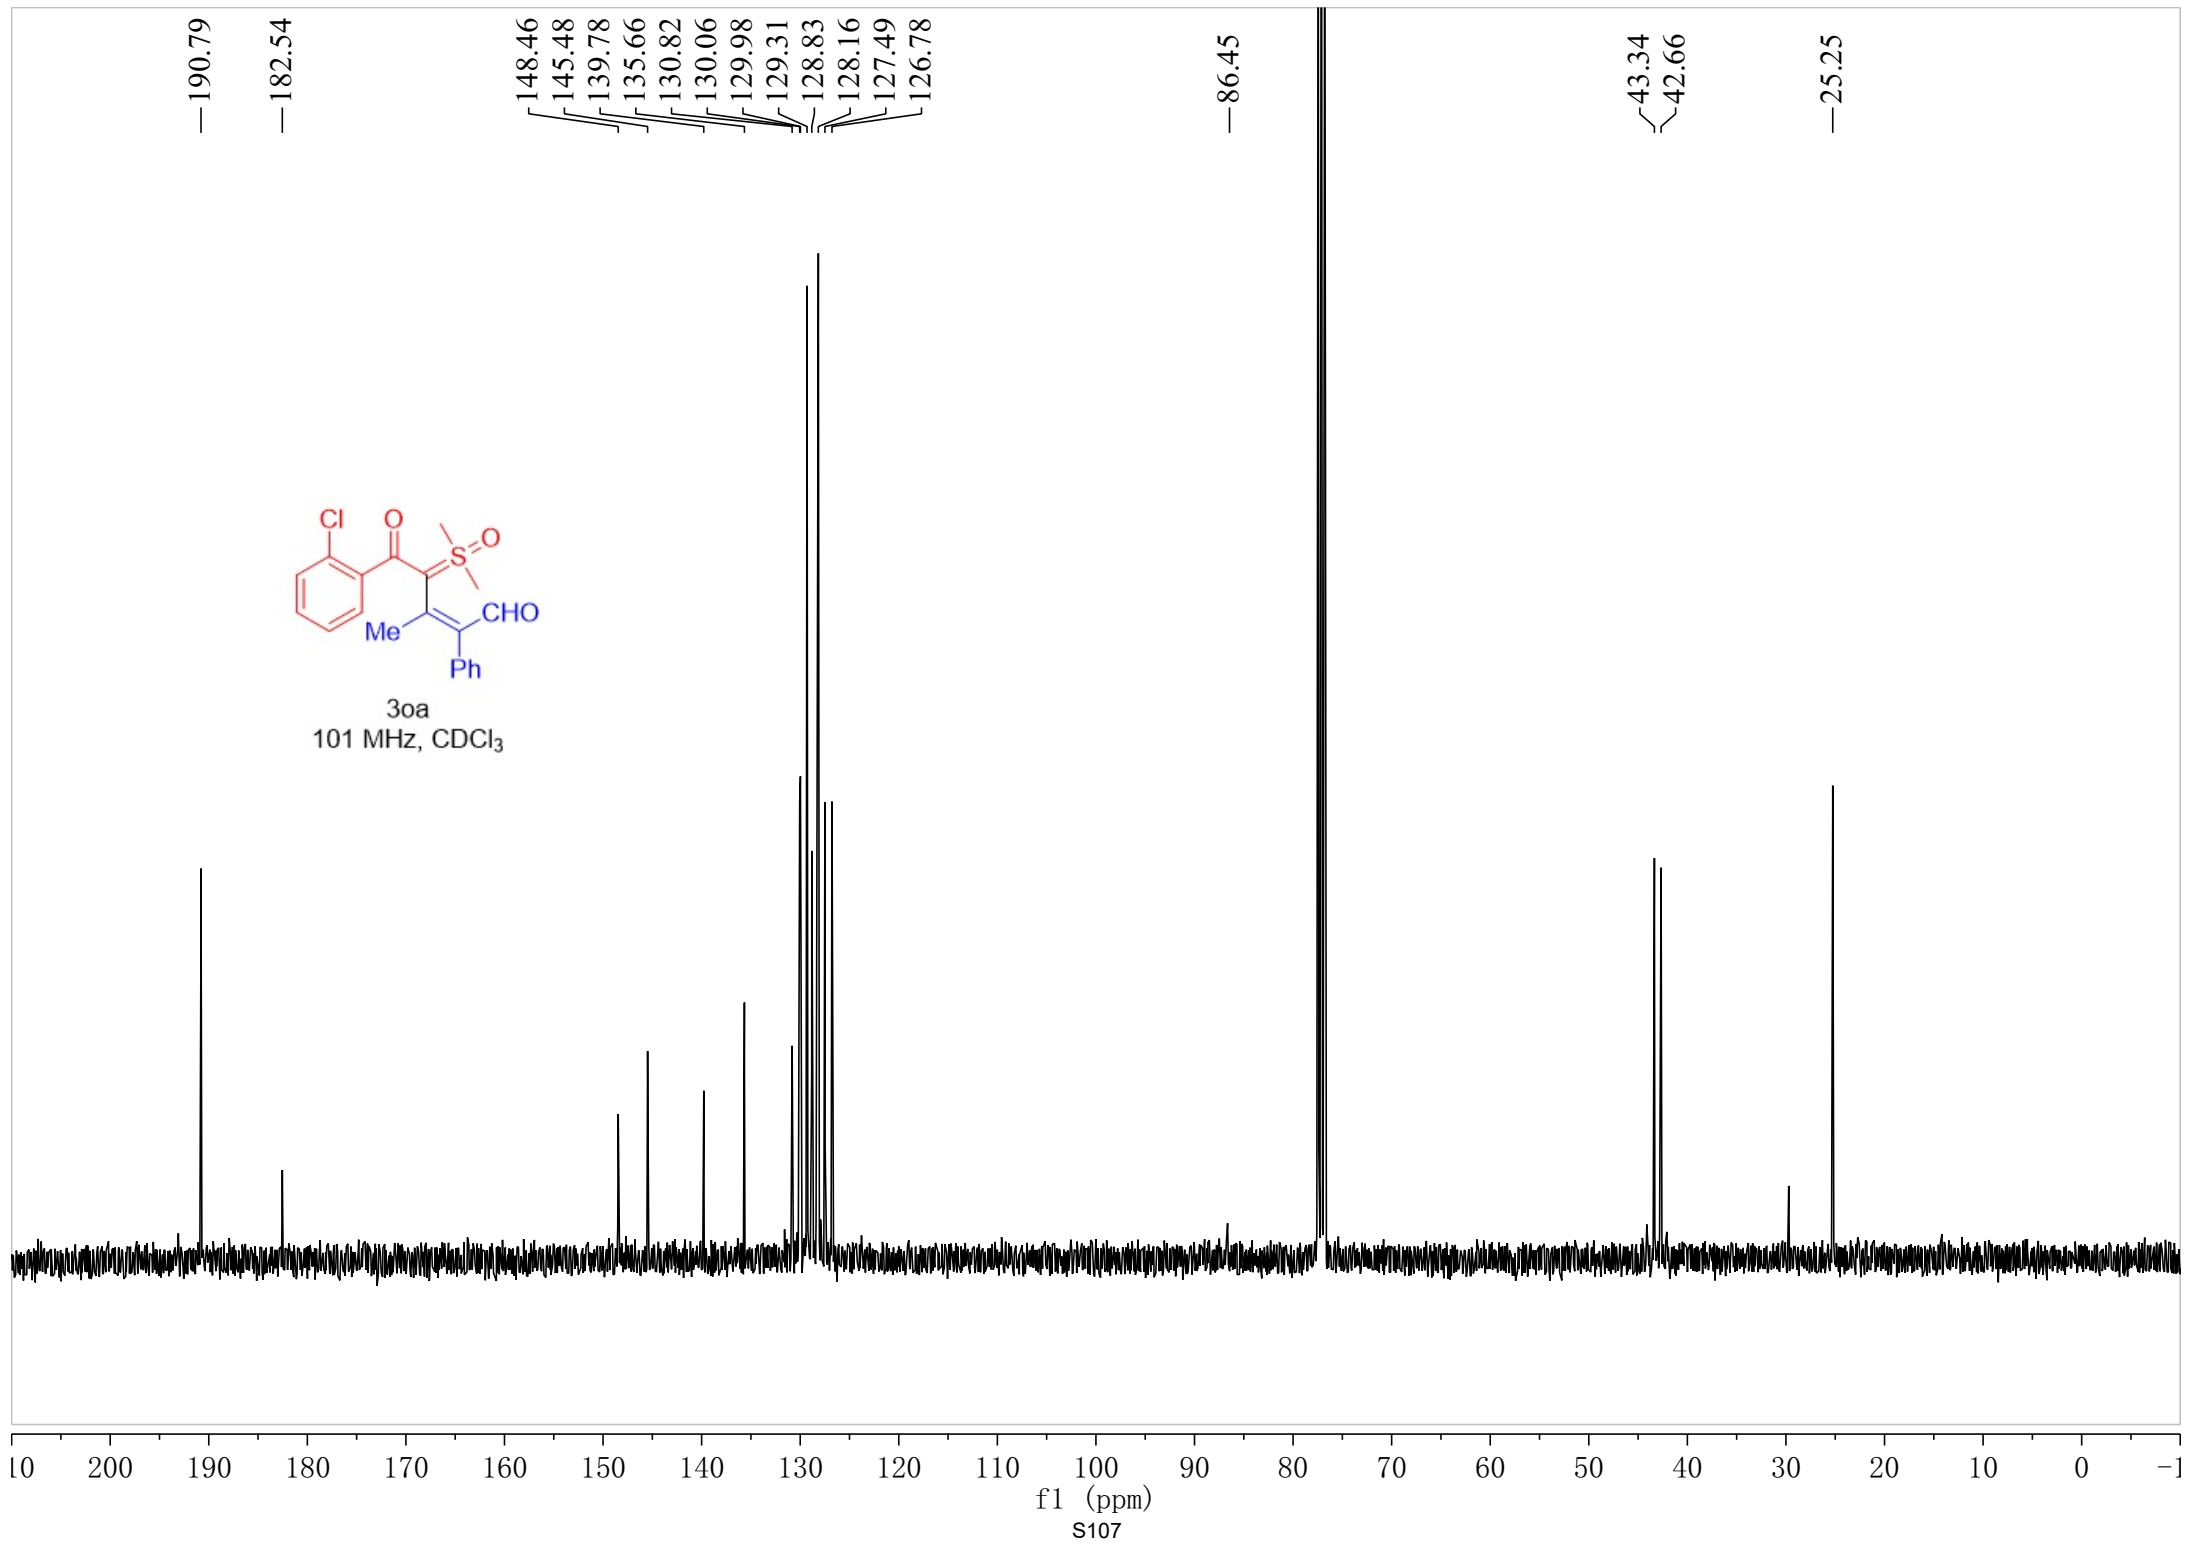

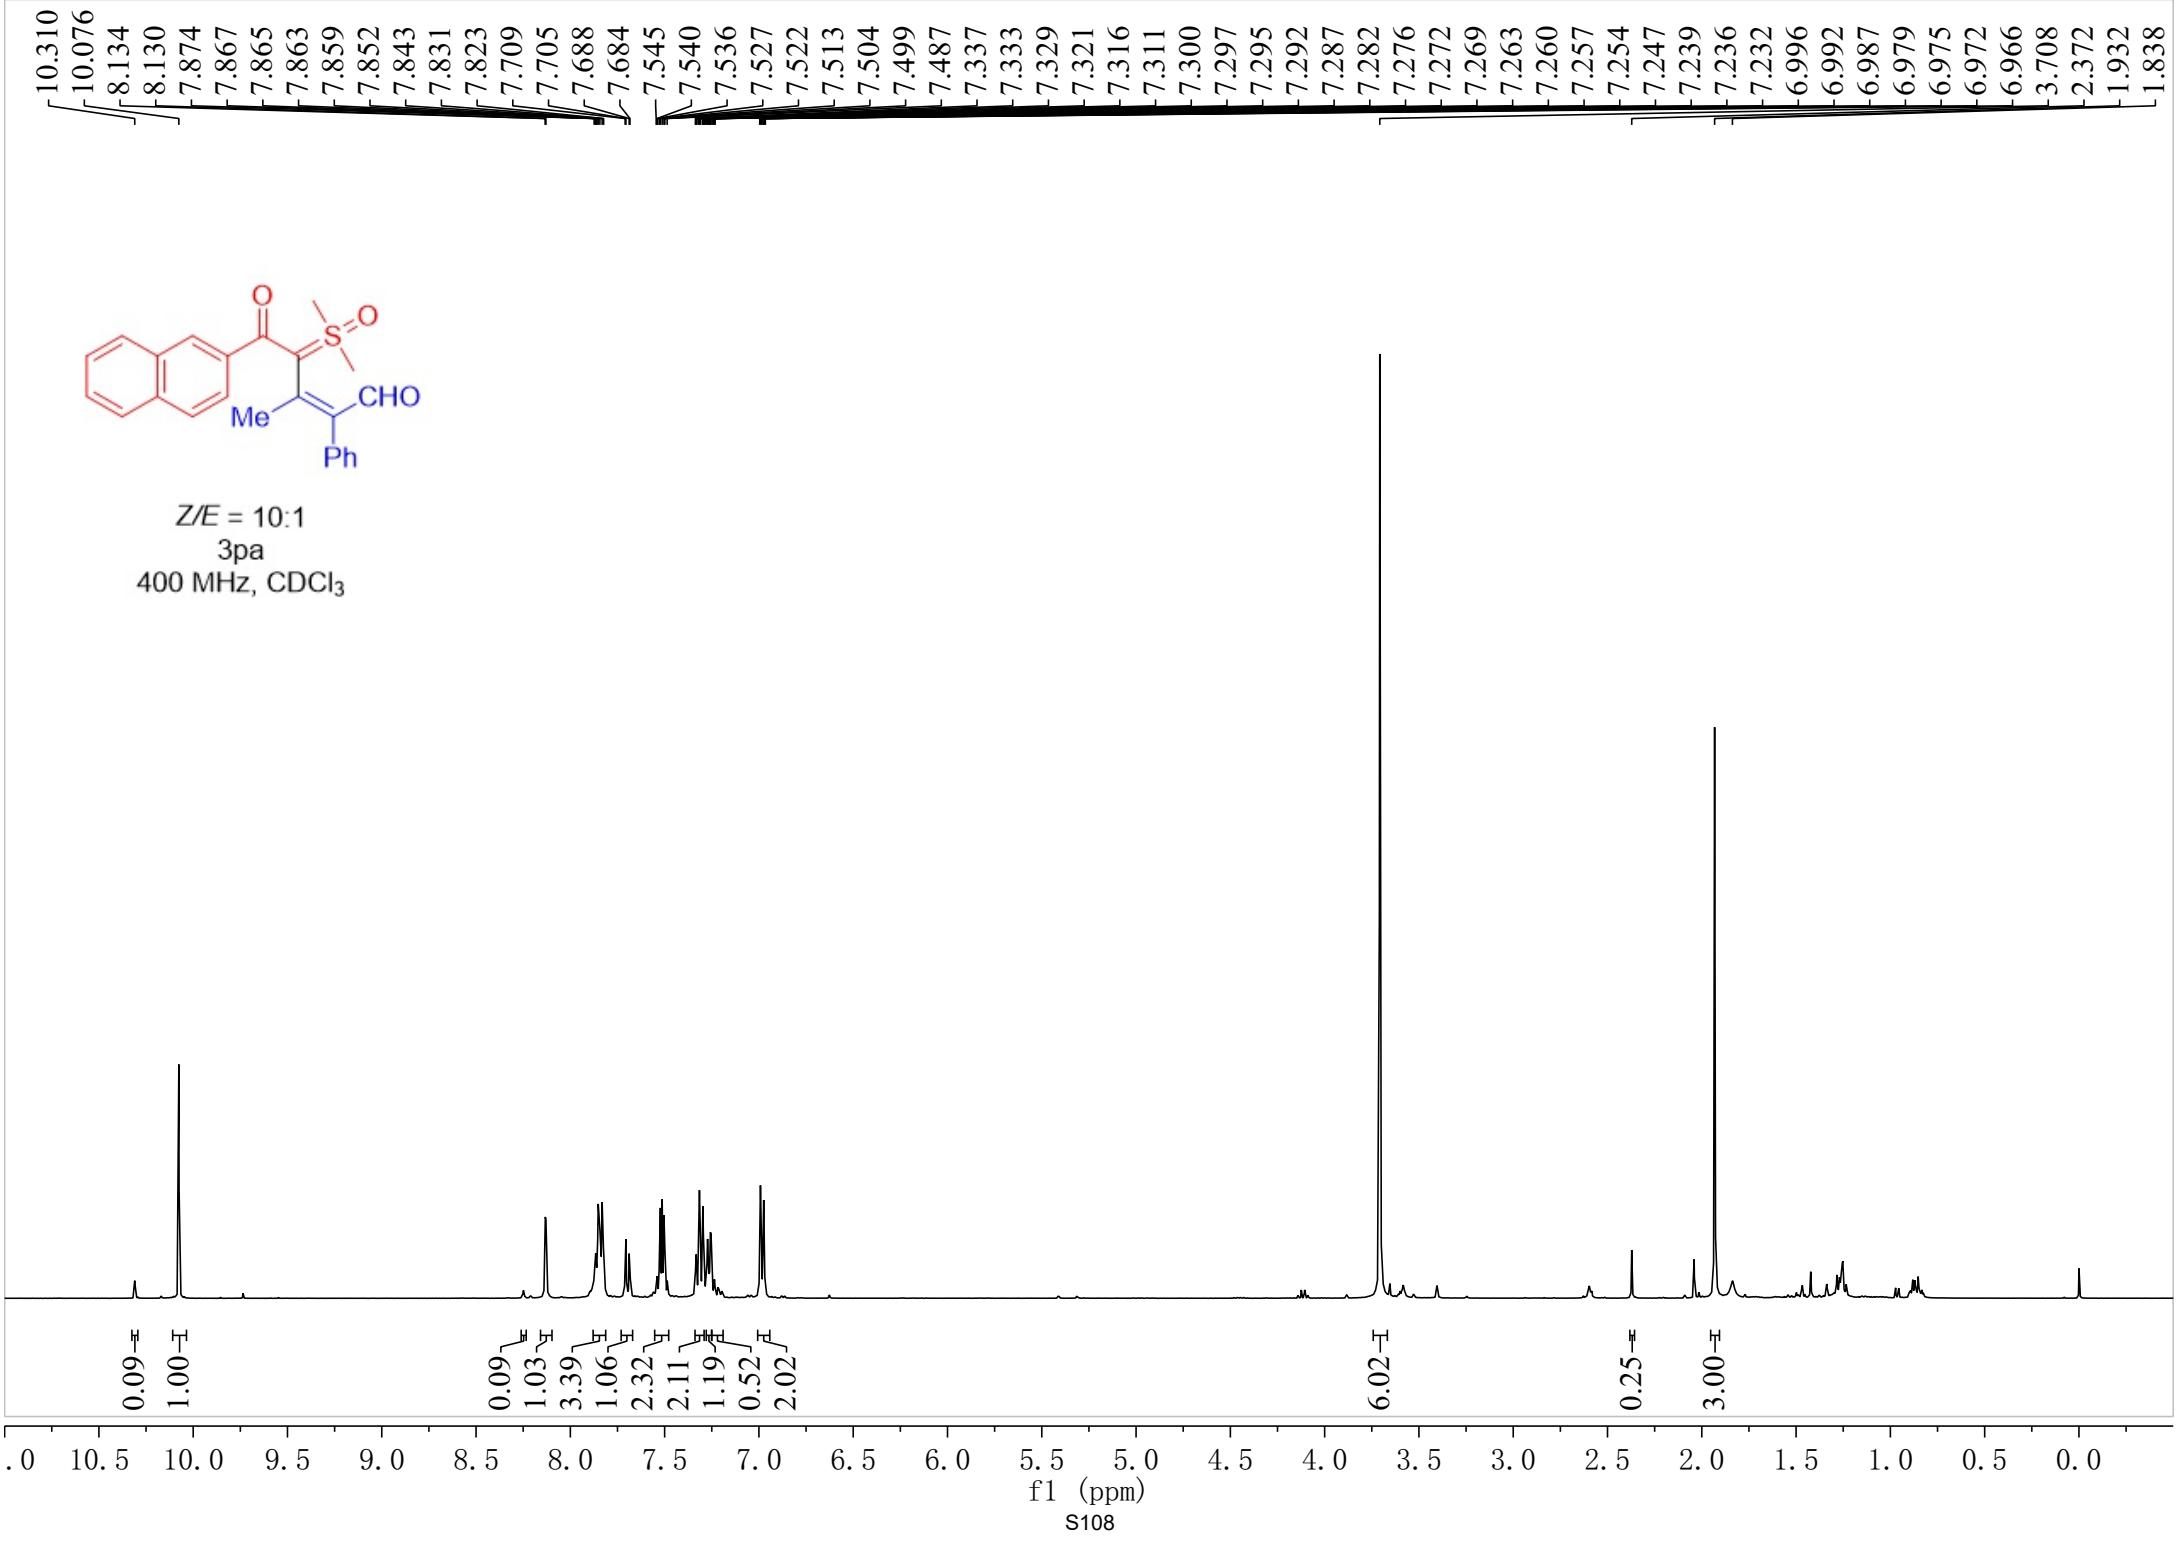

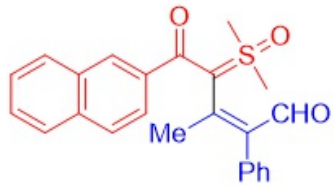

3pa  
101 MHz, CDCl<sub>3</sub>

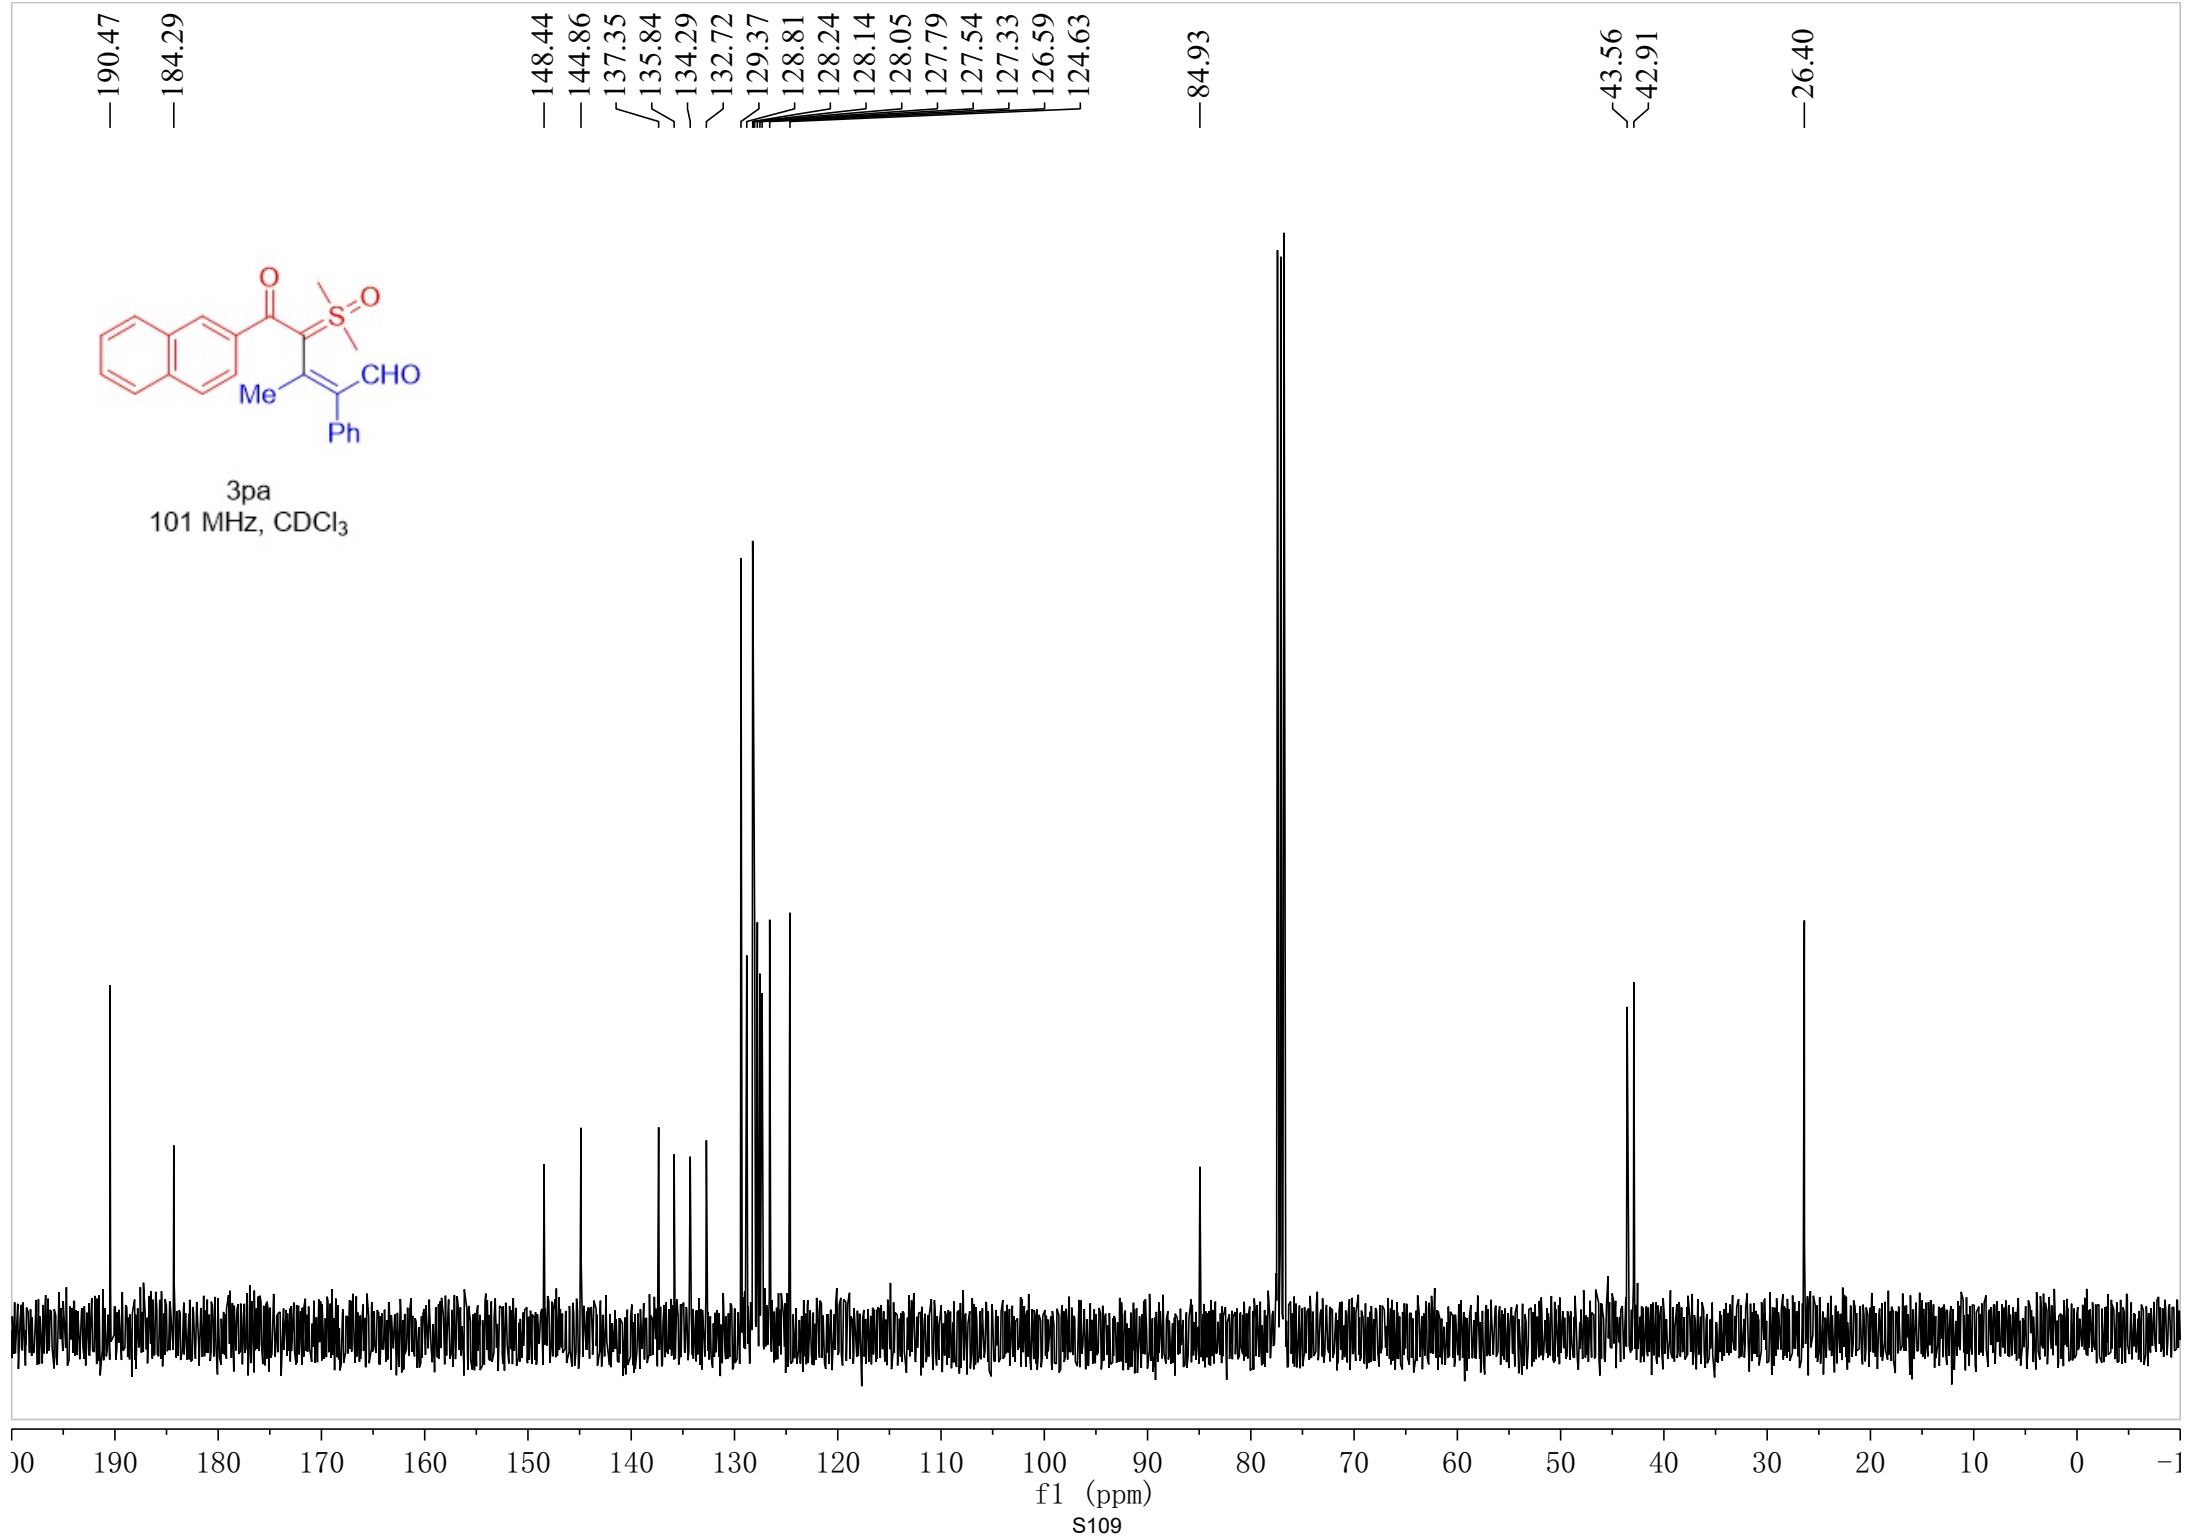

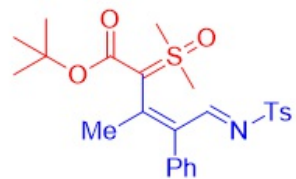

Z/E > 20:1  
5aa  
300 MHz, CDCl<sub>3</sub>

9.026  
7.731  
7.725  
7.709  
7.703  
7.299  
7.293  
7.280  
7.275  
7.267  
7.263  
7.257  
7.249  
7.240  
7.222  
7.102  
7.096  
7.089  
7.081  
7.075  
7.070  
7.061  
3.575  
3.481  
2.376  
2.085  
1.473

0.98

2.06

5.02

2.08

3.06

3.00

3.00

3.00

9.10

9.5 9.0 8.5 8.0 7.5 7.0 6.5 6.0 5.5 5.0 4.5 4.0 3.5 3.0 2.5 2.0 1.5 1.0 0.5 0.0 -0

f1 (ppm)  
S110

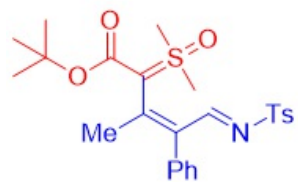

5aa  
75 MHz, CDCl<sub>3</sub>

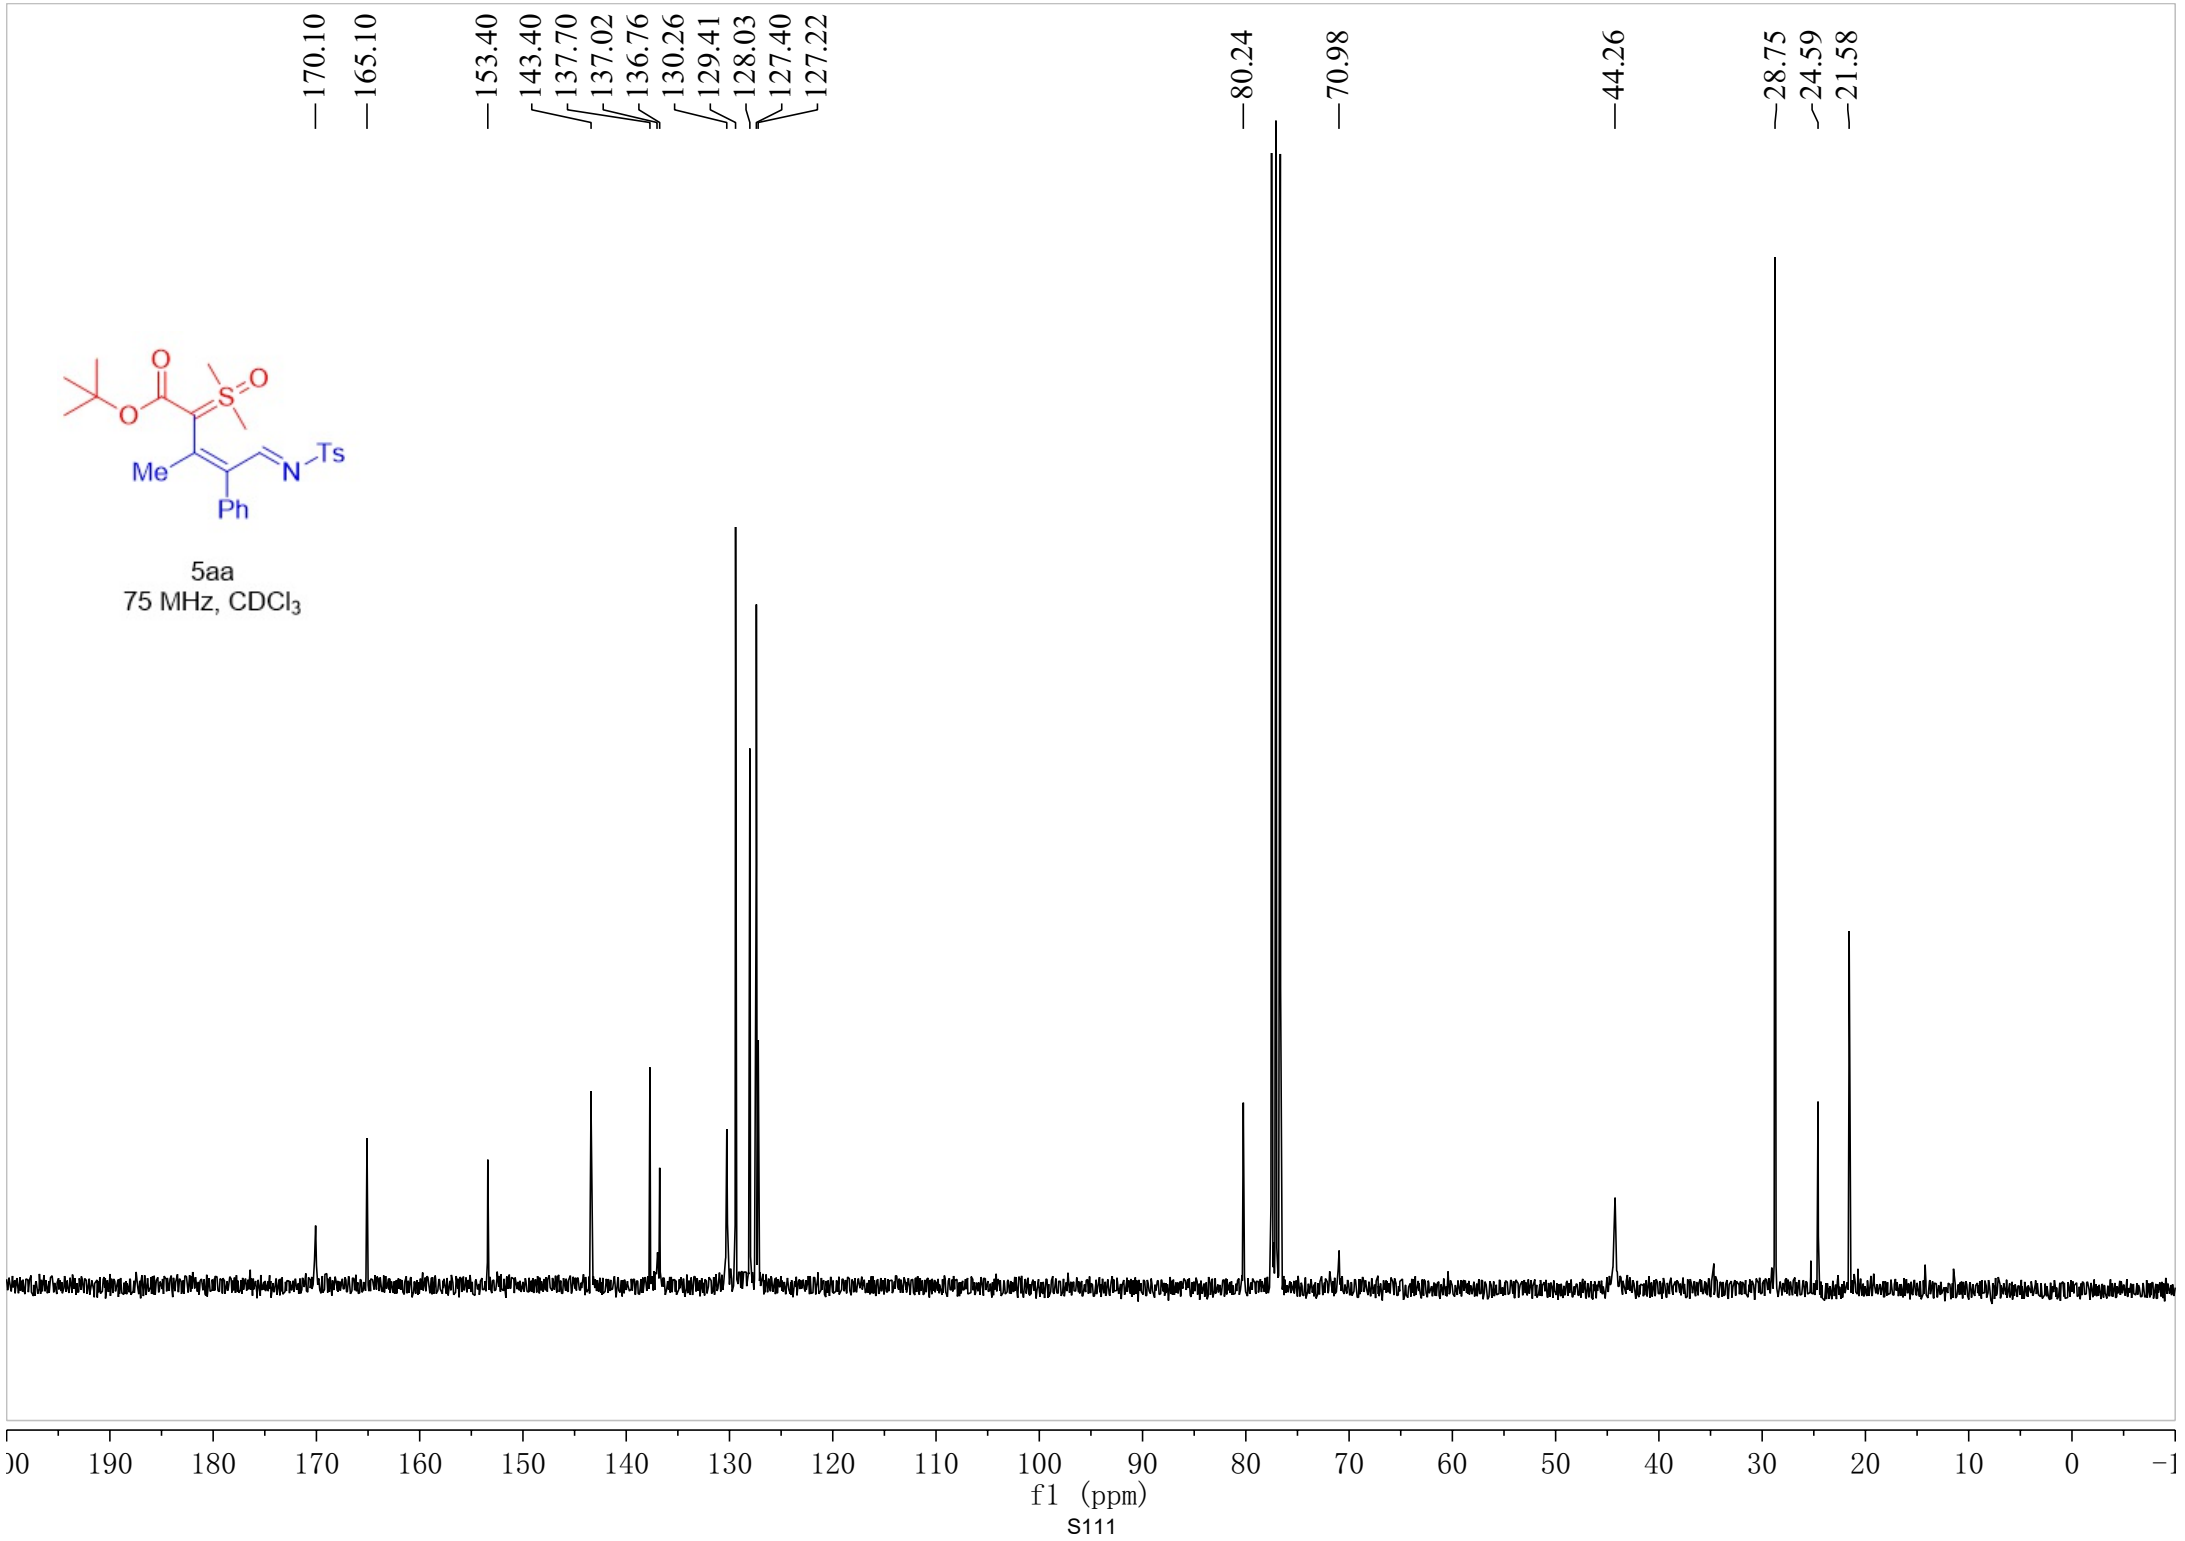

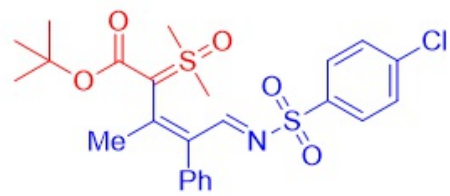

Z/E > 20:1  
5ab  
400 MHz, CDCl<sub>3</sub>

9.016  
7.780  
7.759  
7.416  
7.394  
7.330  
7.325  
7.308  
7.304  
7.290  
7.271  
7.266  
7.253  
7.088  
7.071

3.603  
3.451

2.098

1.478

1.00

2.03

2.10

3.22

2.05

3.00

3.03

3.00

9.08

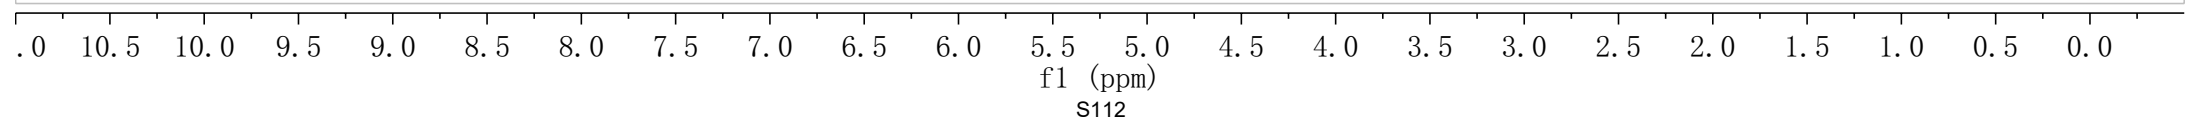

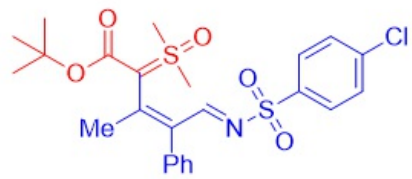

5ab  
101 MHz, CDCl<sub>3</sub>

—170.54  
—165.09  
—154.46  
141.17  
139.03  
138.46  
137.25  
130.21  
129.04  
128.80  
128.10  
127.31

—80.44  
—71.69  
—44.42  
—28.73  
—24.59

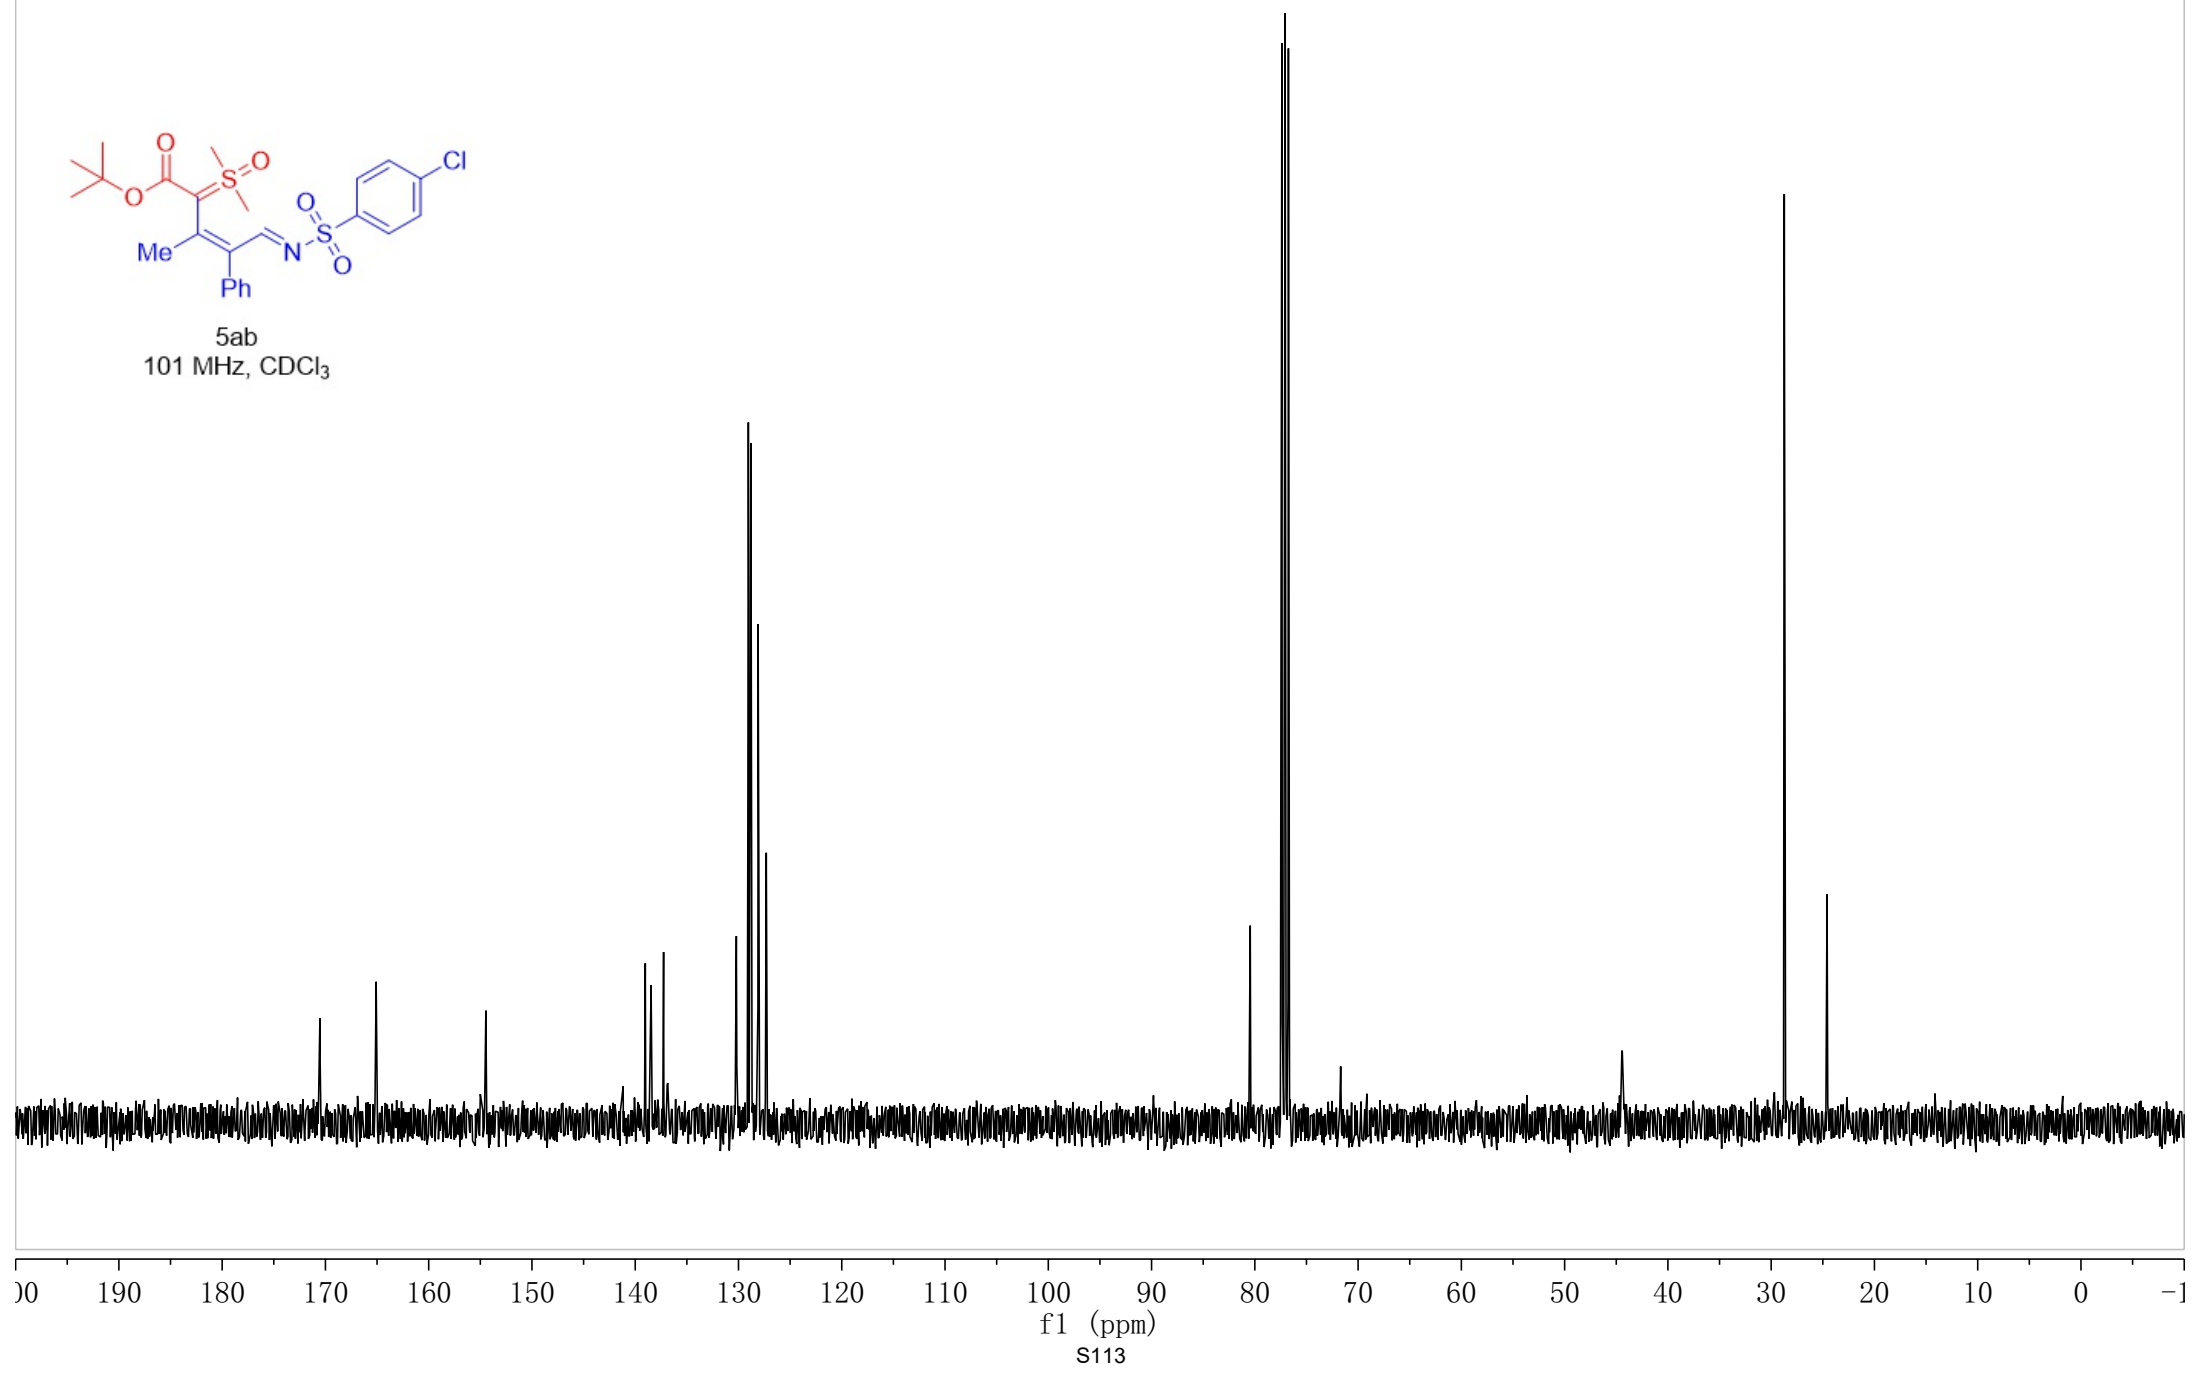

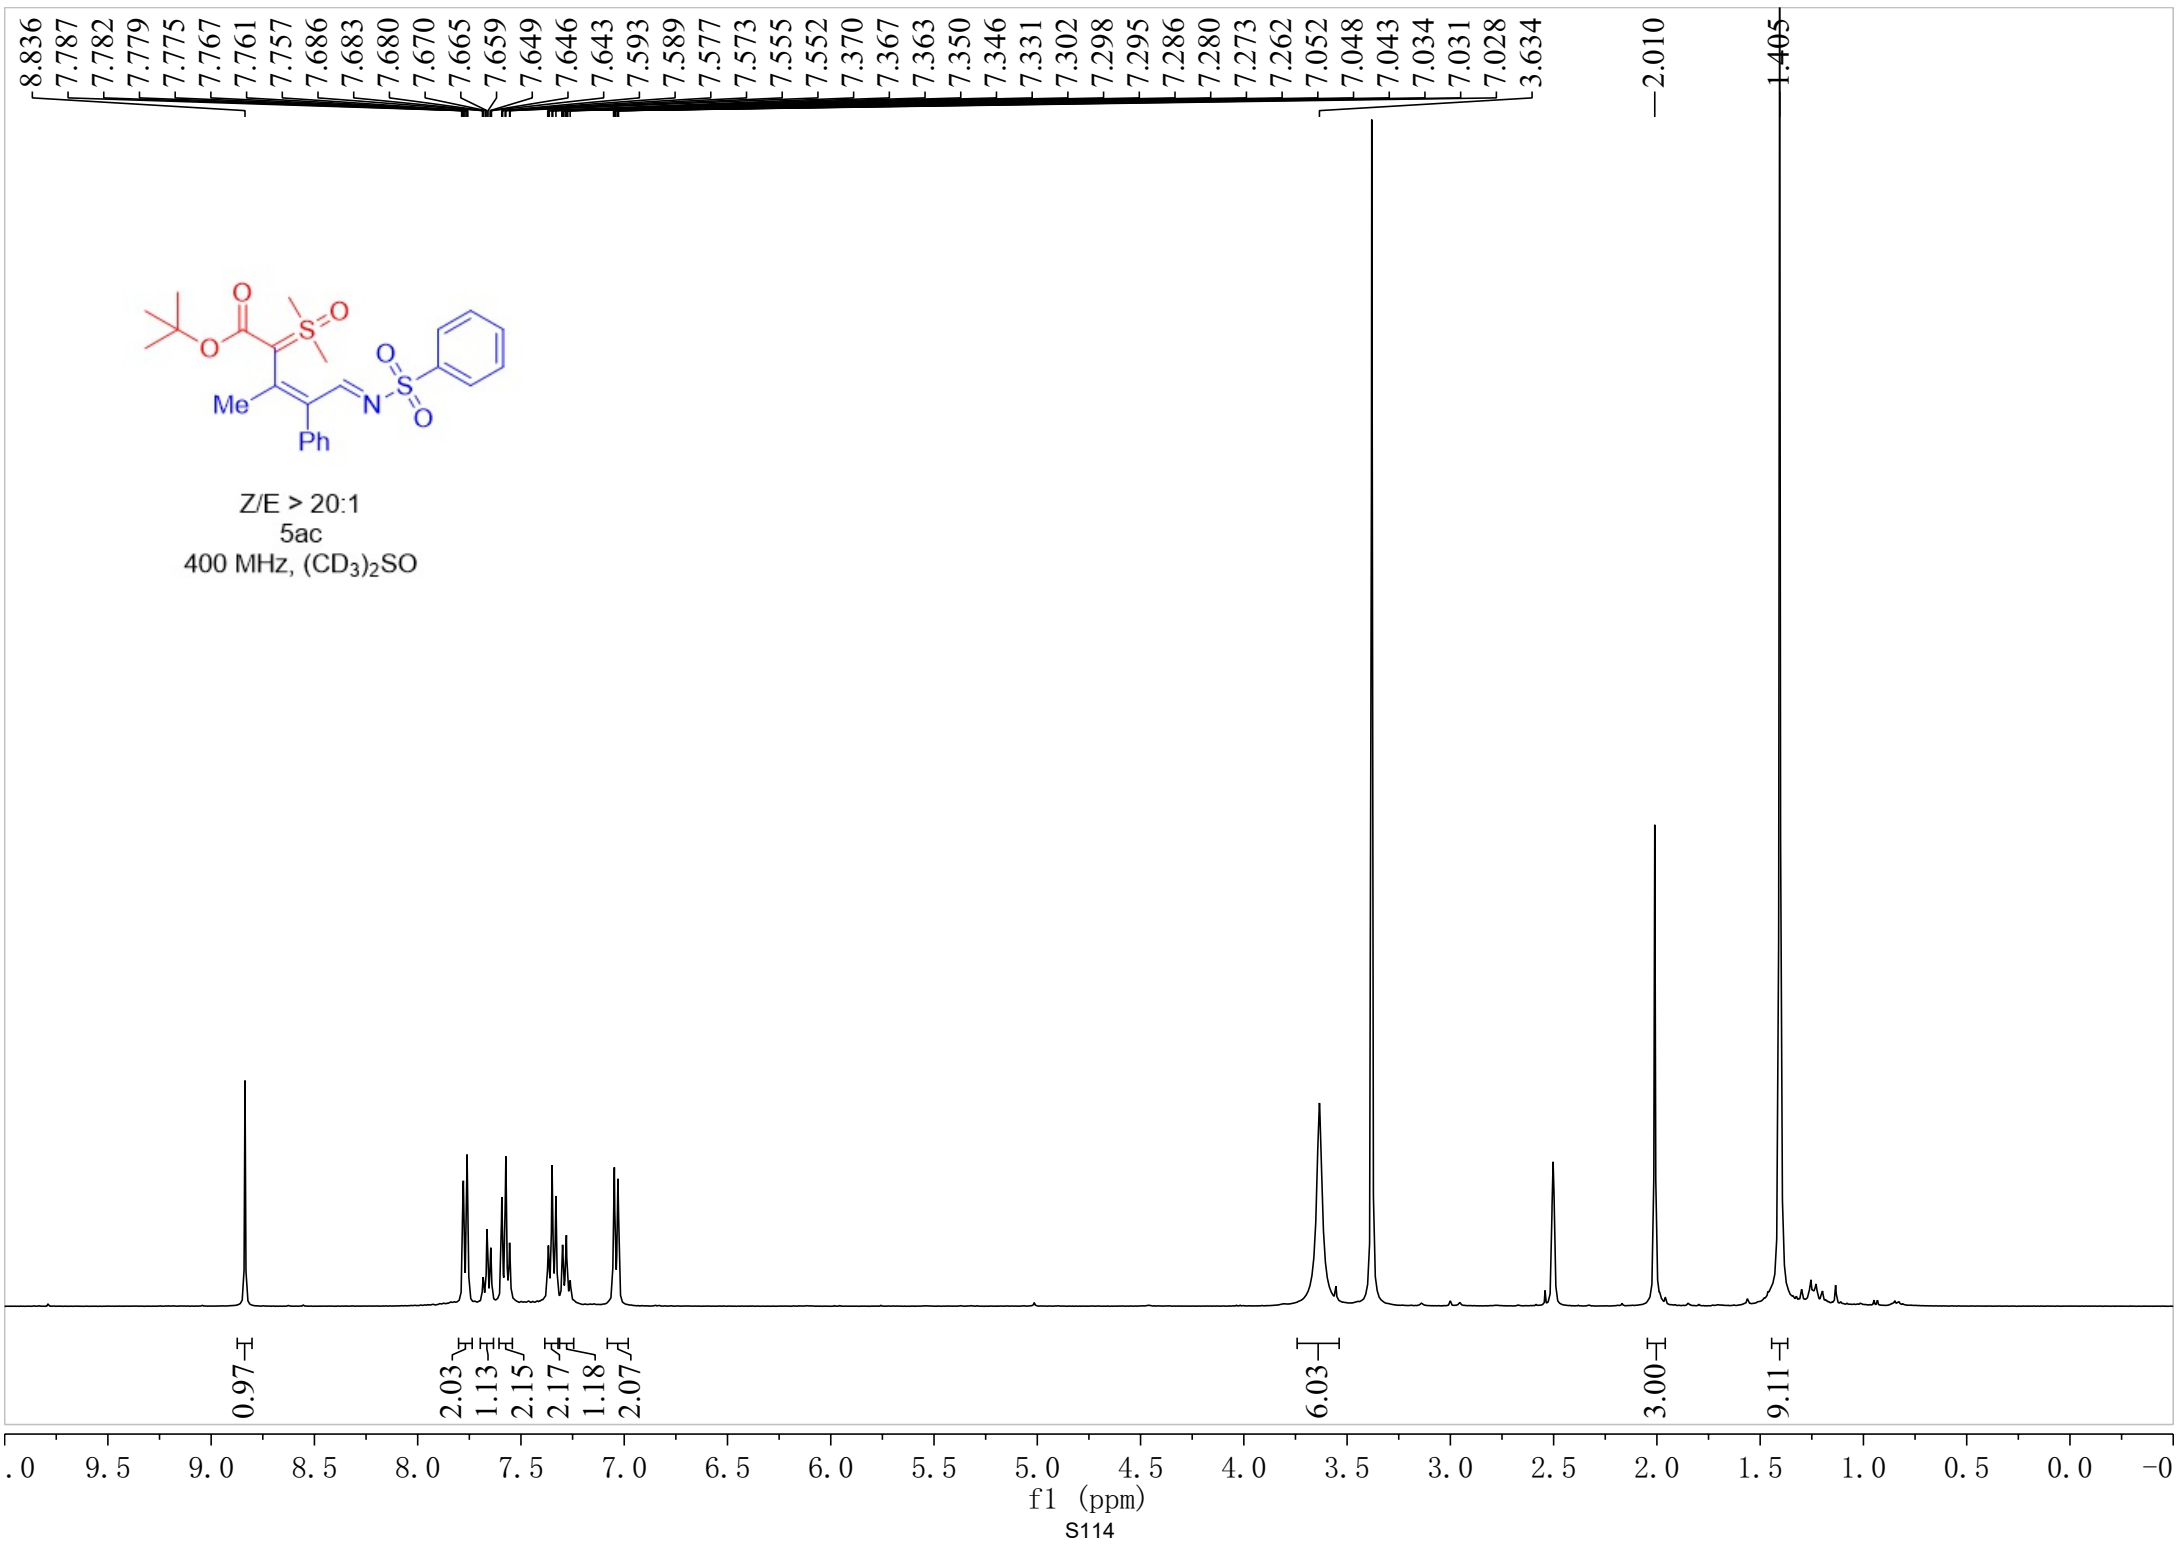

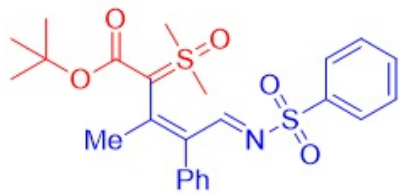

5ac  
101MHz, (CD<sub>3</sub>)<sub>2</sub>SO

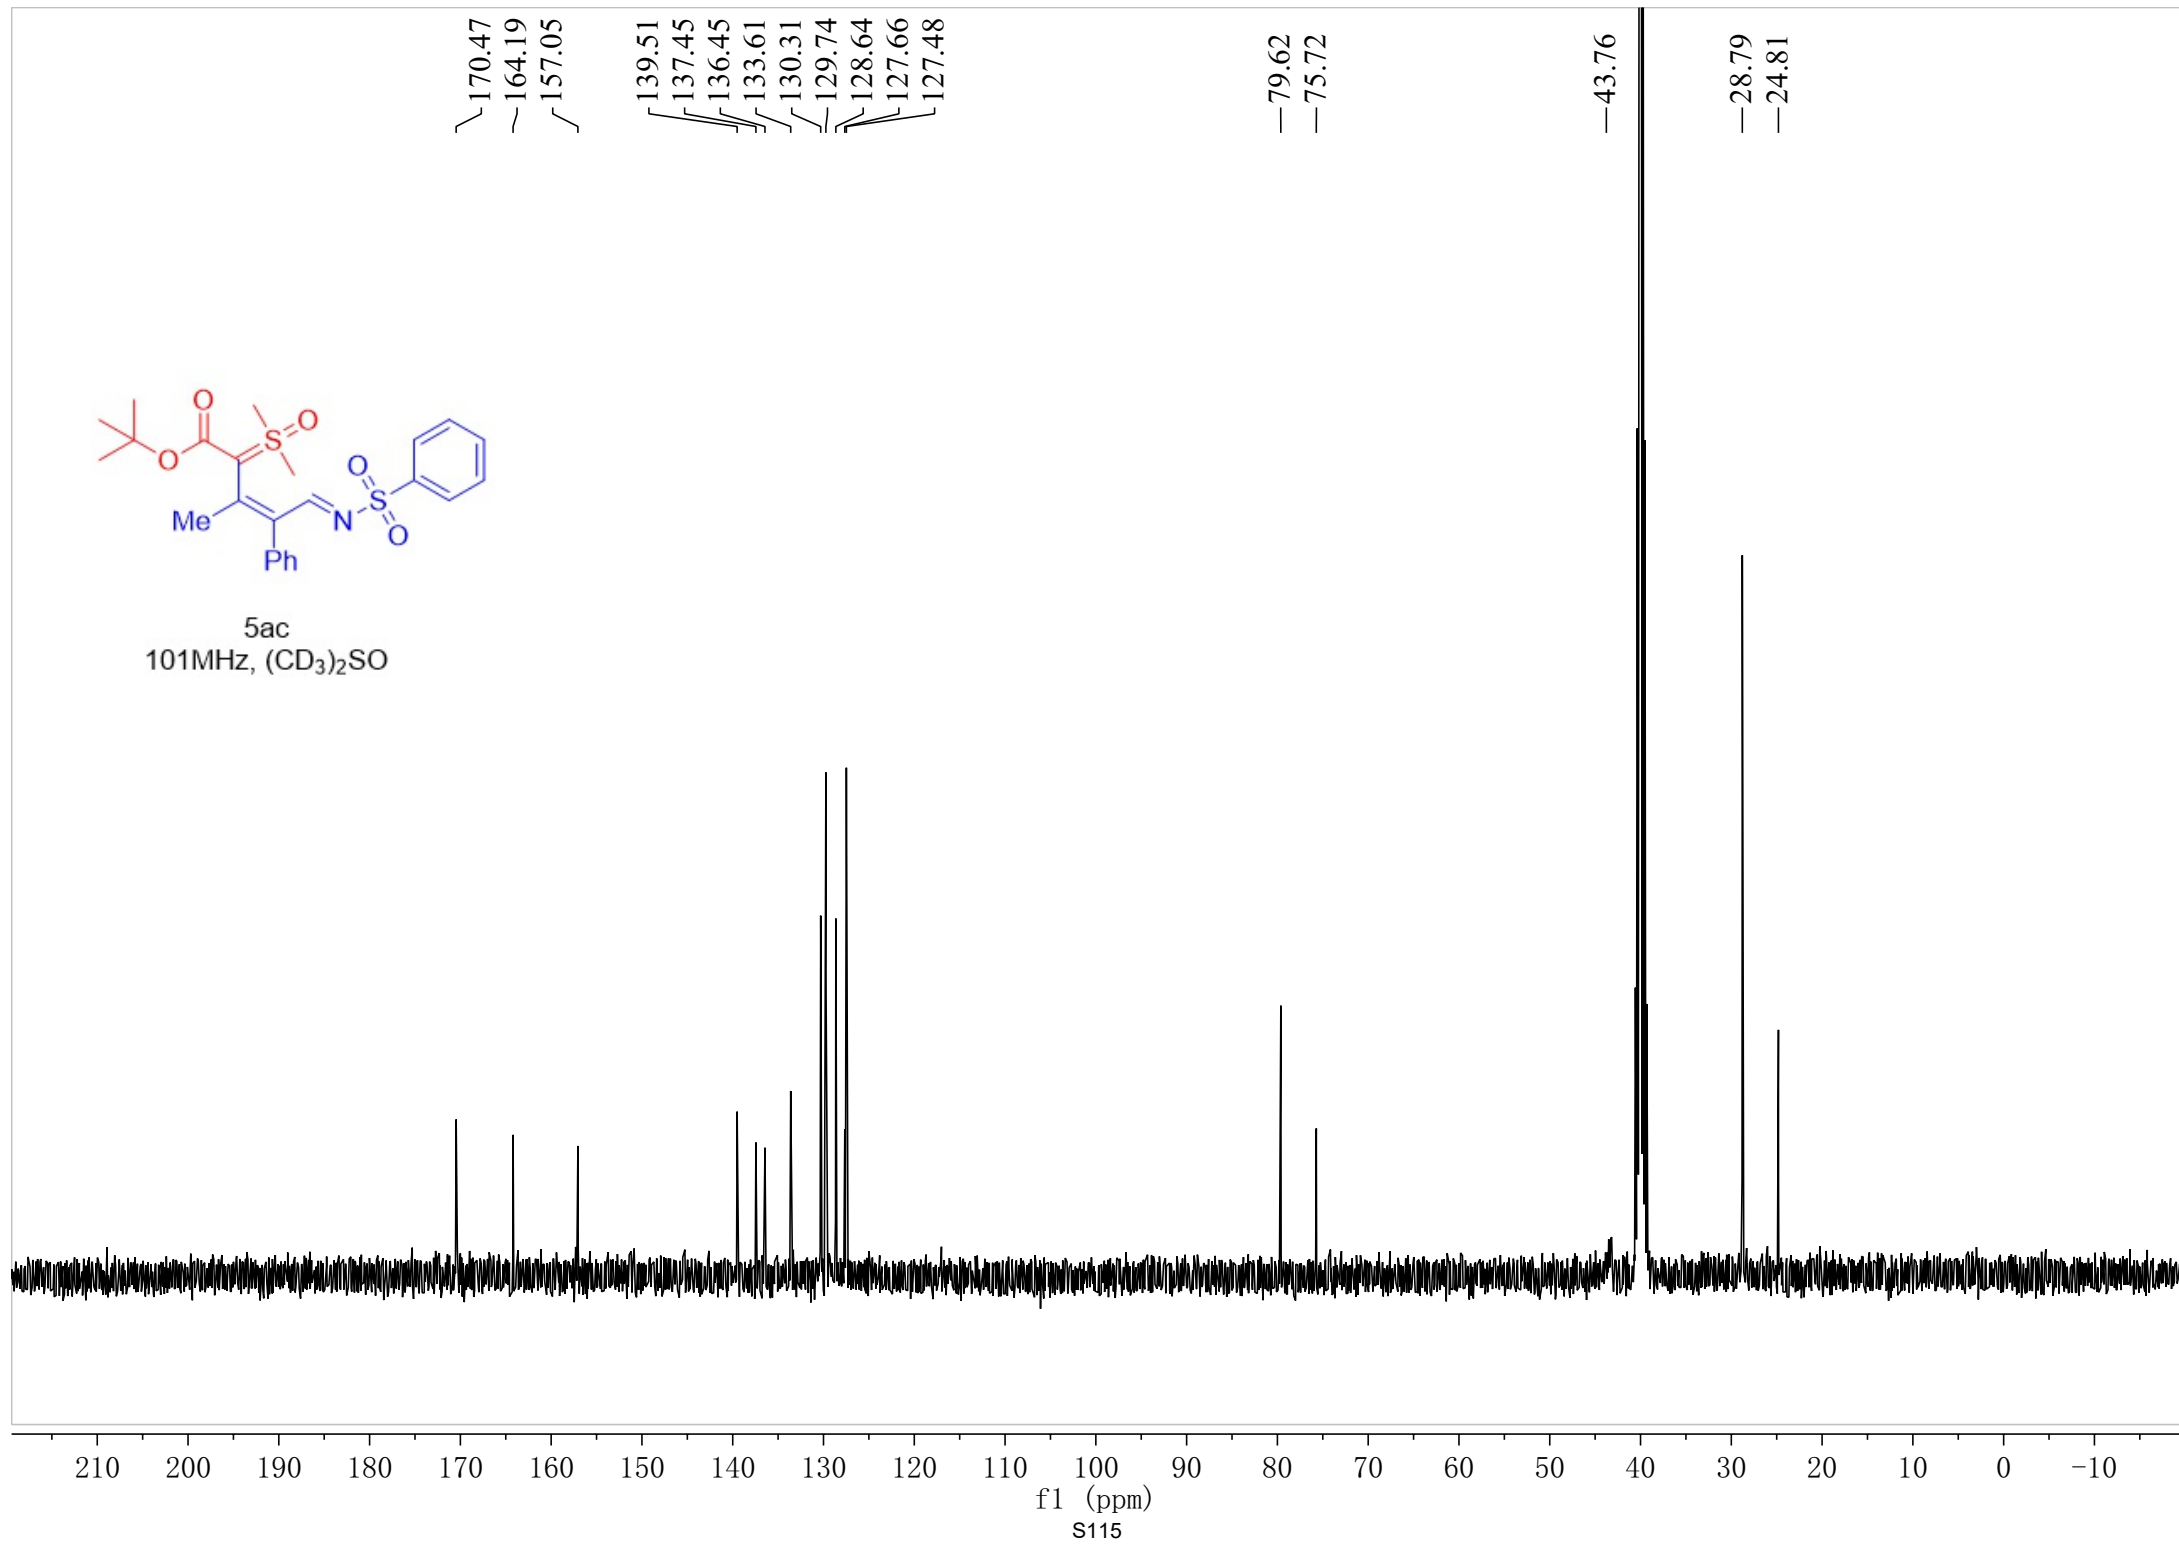

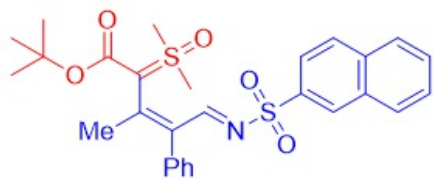

Z/E > 20:1  
5ad  
400 MHz, (CD<sub>3</sub>)<sub>2</sub>SO

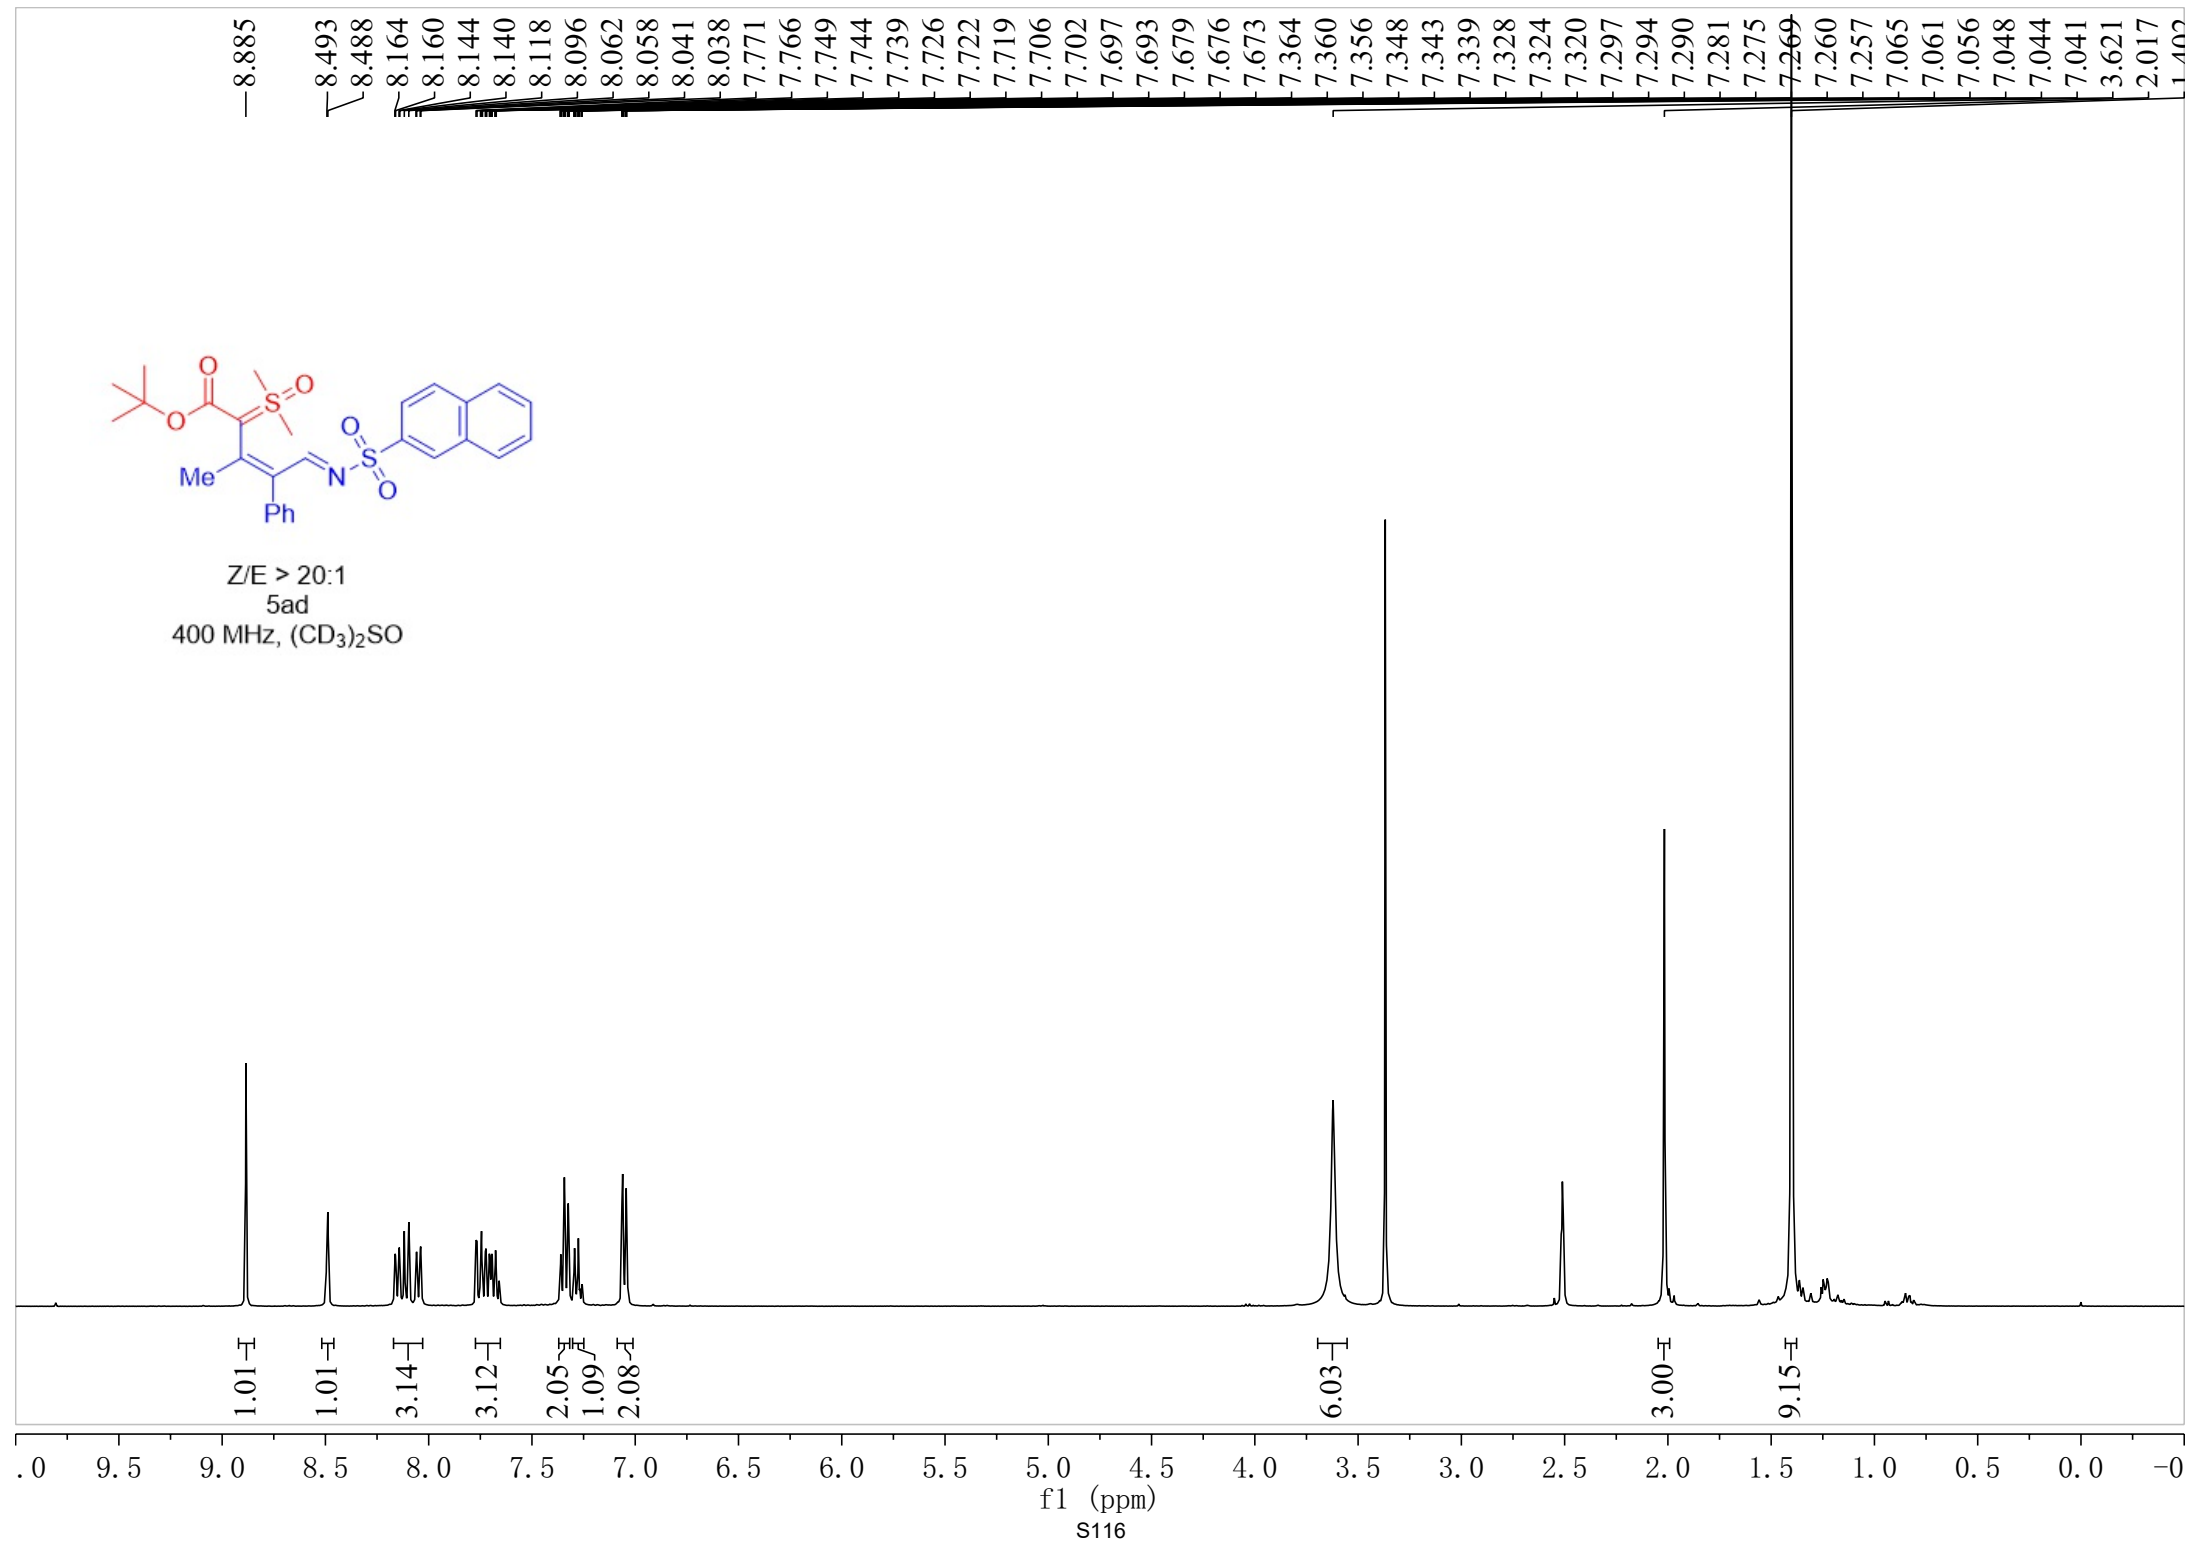

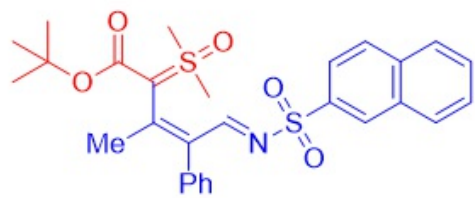

5ad  
101 MHz, (CD<sub>3</sub>)<sub>2</sub>SO

170.47  
164.17  
157.11  
137.46  
136.57  
136.47  
134.85  
132.13  
130.31  
129.79  
129.76  
129.56  
128.65  
128.62  
128.31  
128.14  
127.64  
123.01

79.62  
75.79

45.18

28.77  
24.80

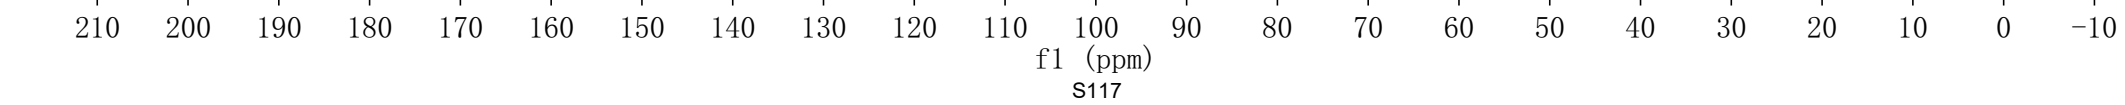

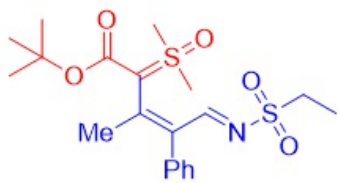

Z/E > 20:1  
5ae  
400 MHz, (CD<sub>3</sub>)<sub>2</sub>SO

8.791  
7.414  
7.411  
7.407  
7.394  
7.390  
7.375  
7.333  
7.329  
7.326  
7.316  
7.311  
7.305  
7.296  
7.293  
7.289  
7.139  
7.134  
7.129  
7.121  
7.117  
7.114  
7.109

3.630  
3.057  
3.039  
3.021  
3.002

2.022  
1.421  
1.128  
1.110  
1.092

0.98

2.09  
1.06  
2.00

6.03

1.98

3.00

9.05

3.06

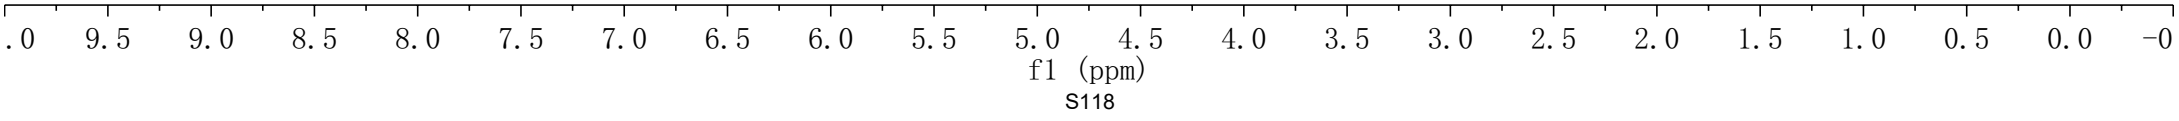

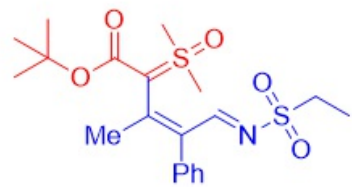

5ae  
101 MHz, (CD<sub>3</sub>)<sub>2</sub>SO

—171.76

—164.25

—155.57

~137.70

~136.82

~130.38

~128.62

~127.61

—79.49

—74.51

~49.18

~46.72

—28.81

—24.68

—8.16

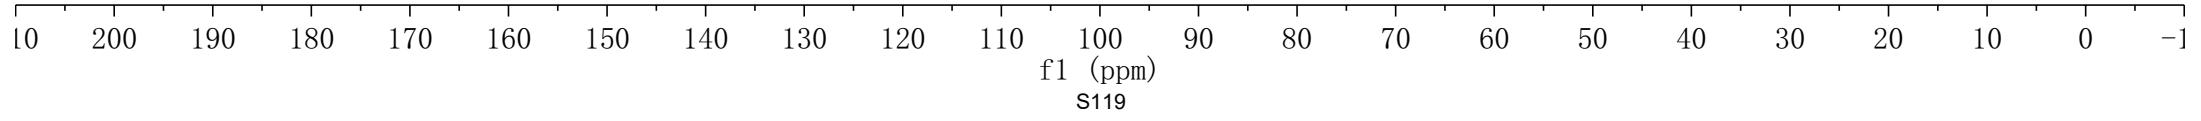

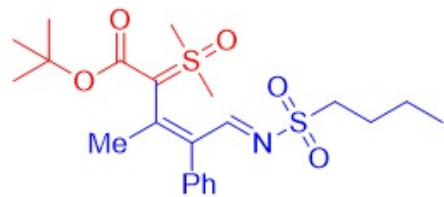

Z/E > 20:1  
 5af  
 400 MHz, (CD<sub>3</sub>)<sub>2</sub>SO

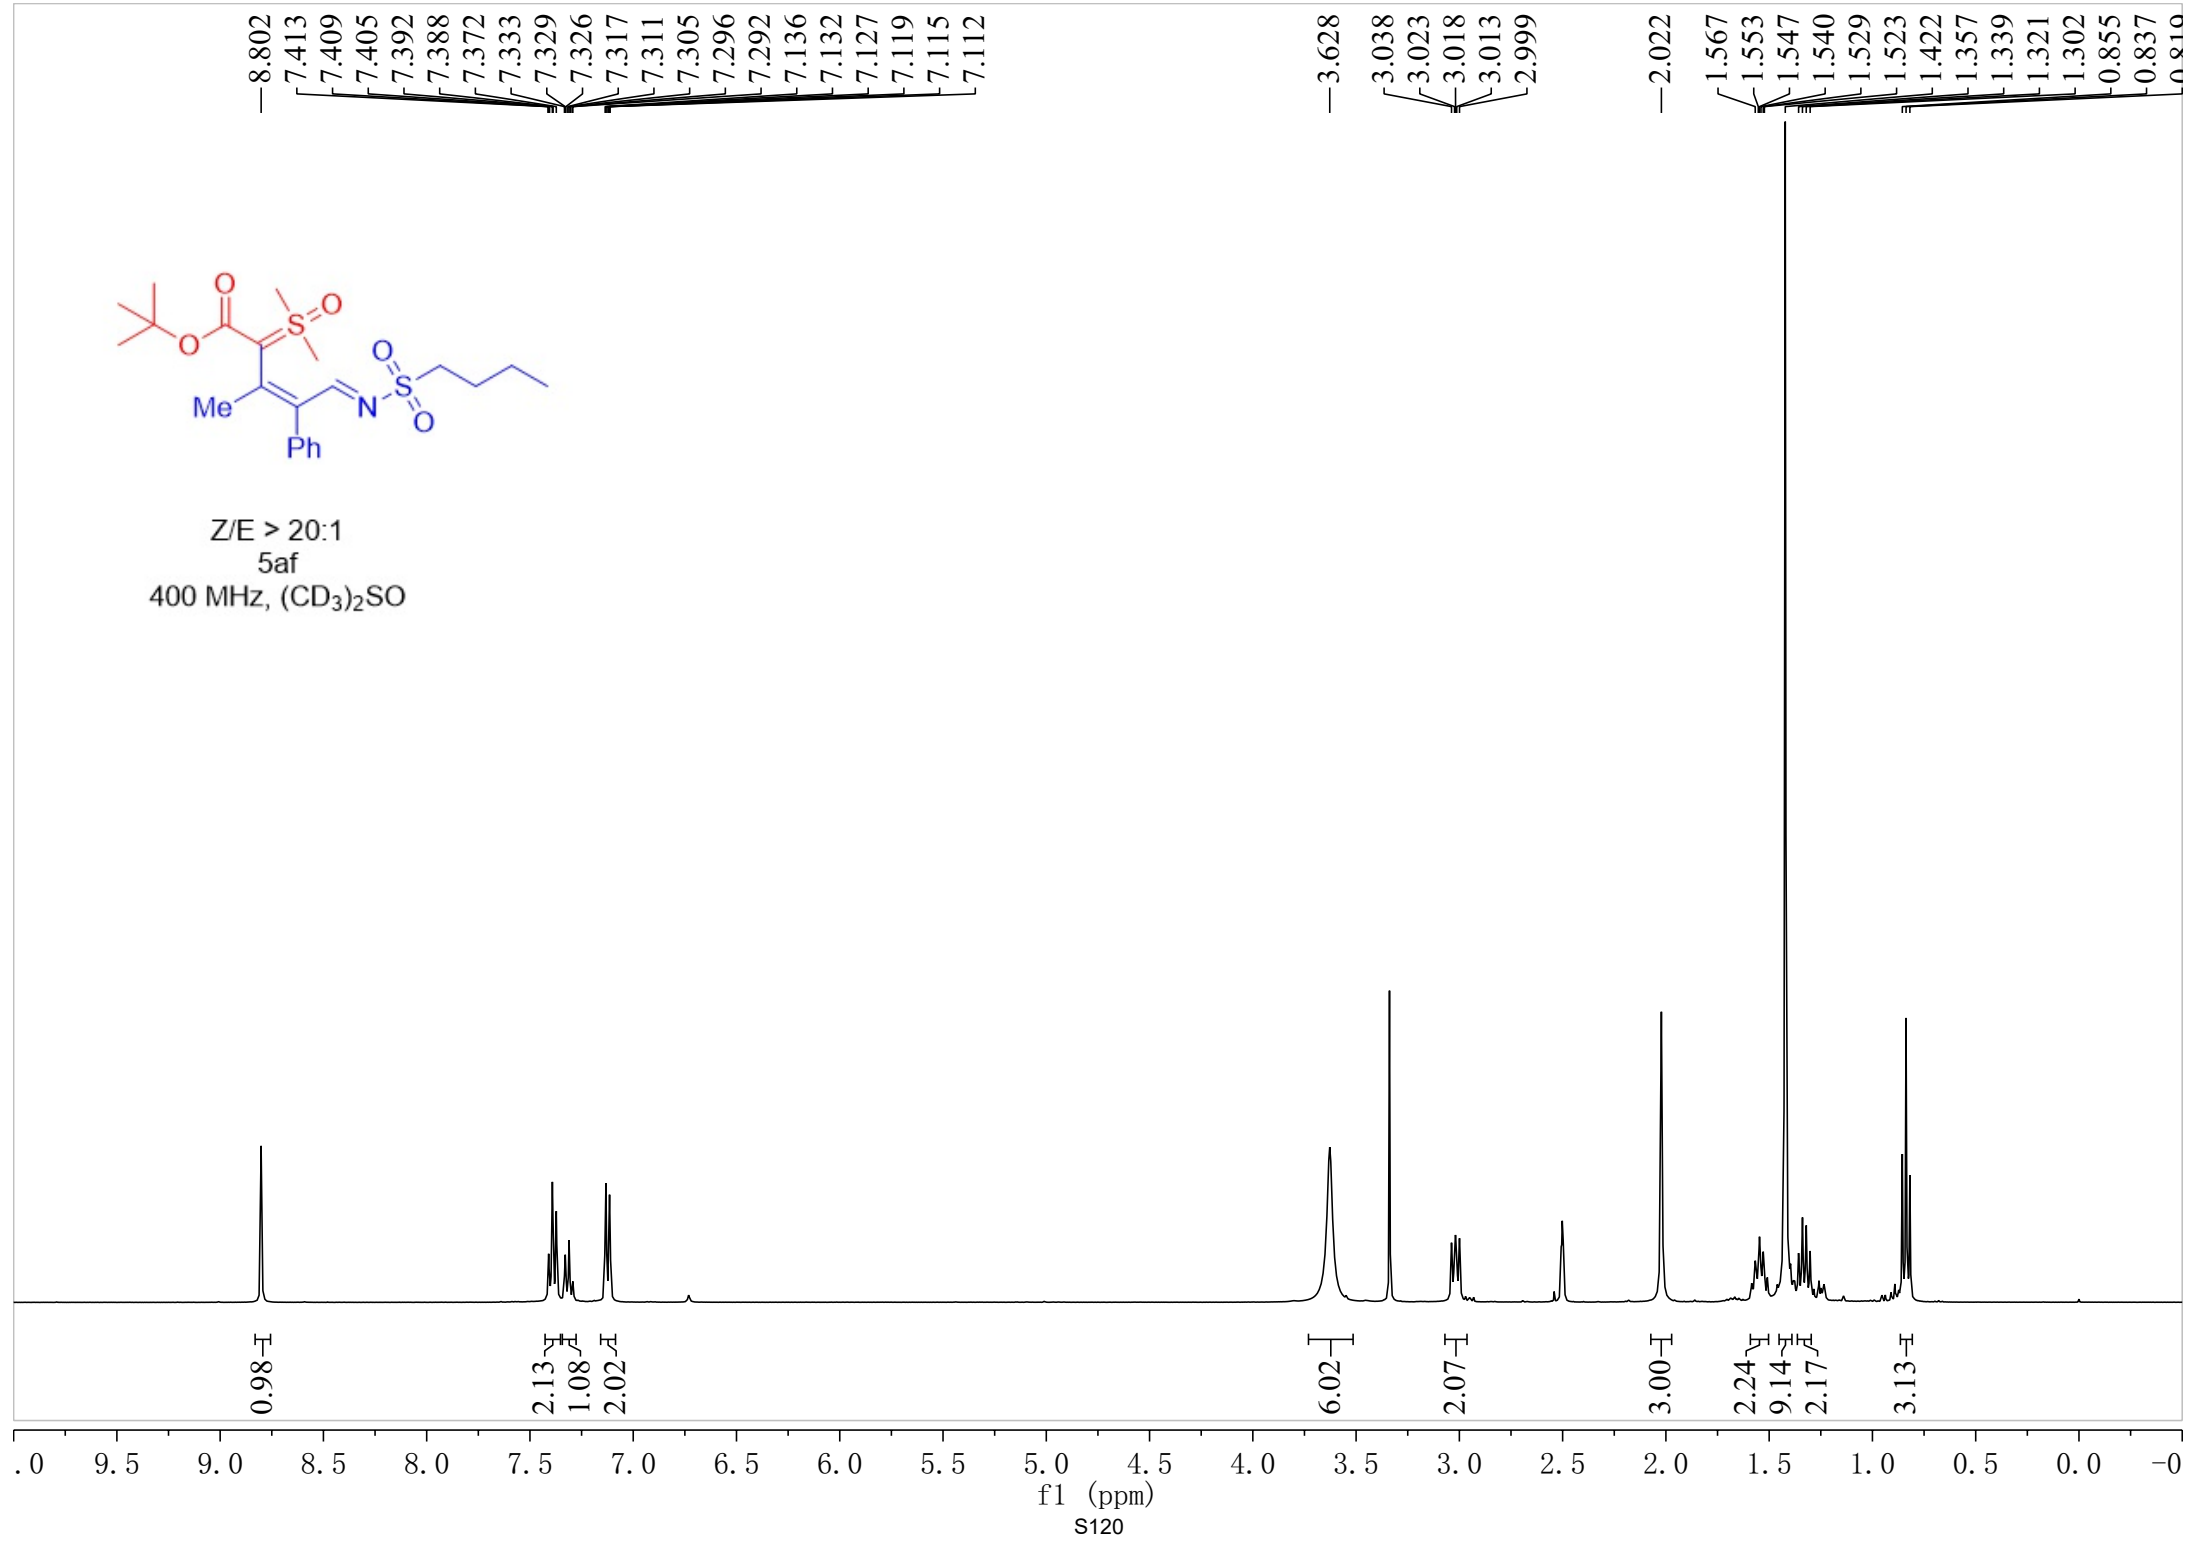

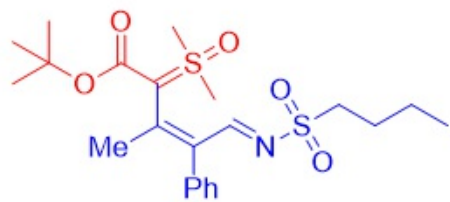

5af  
101 MHz, (CD<sub>3</sub>)<sub>2</sub>SO

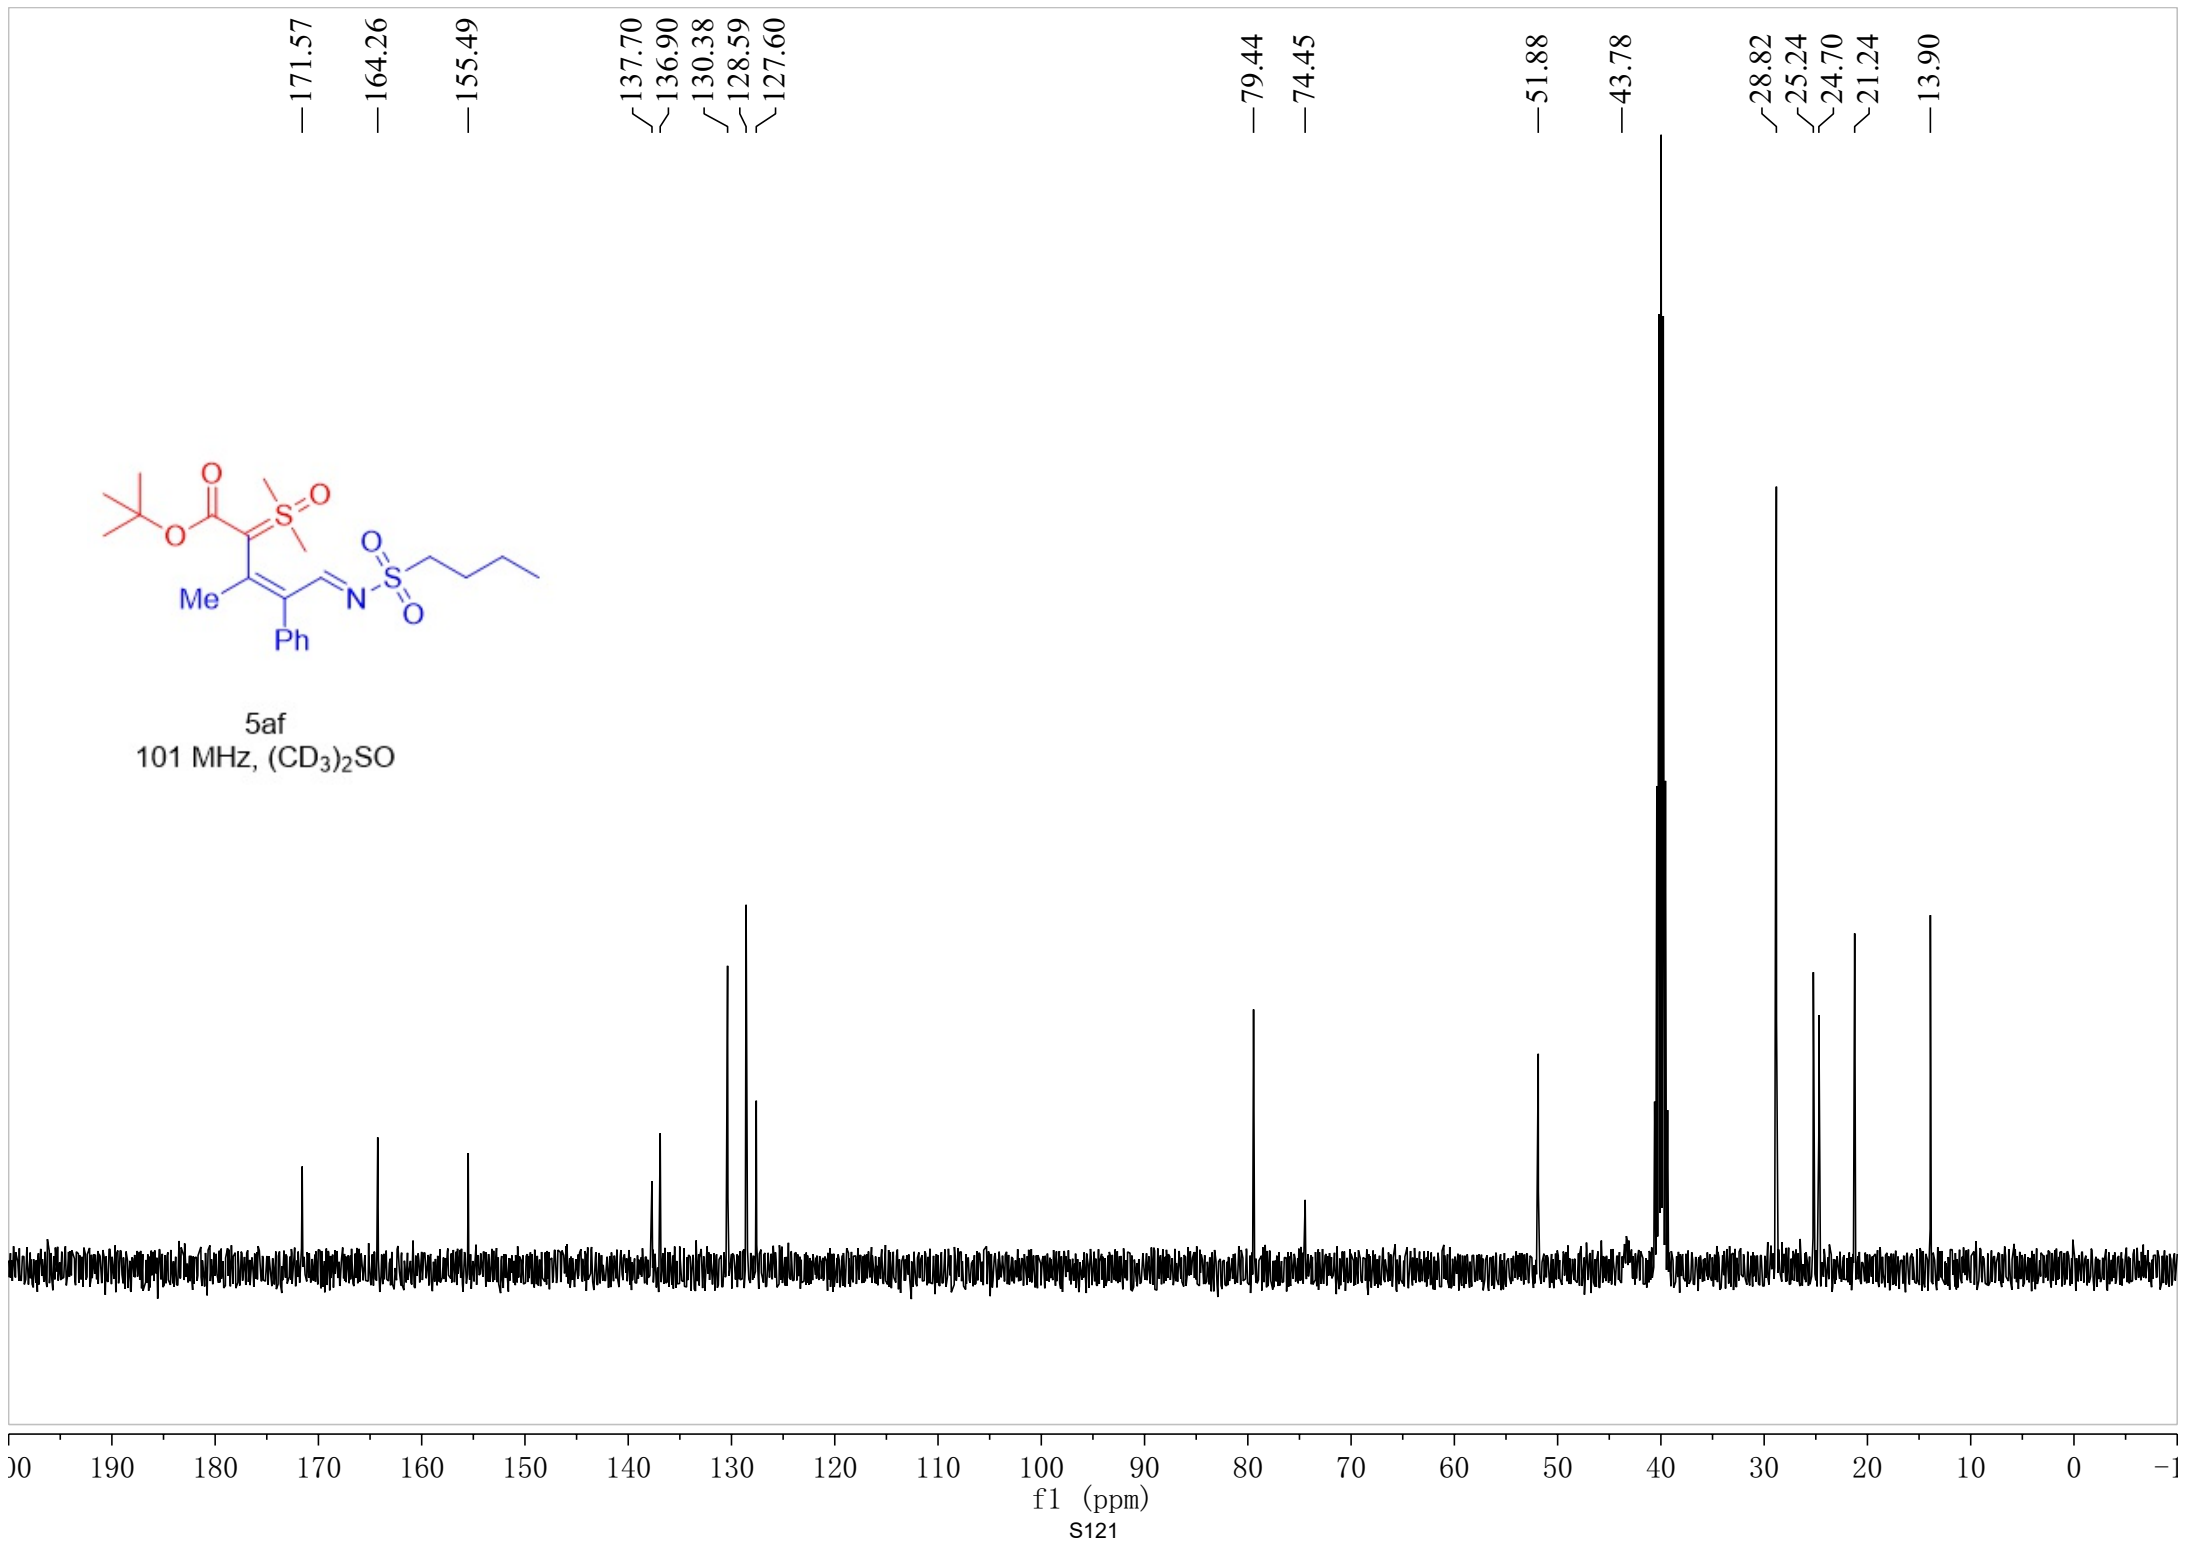

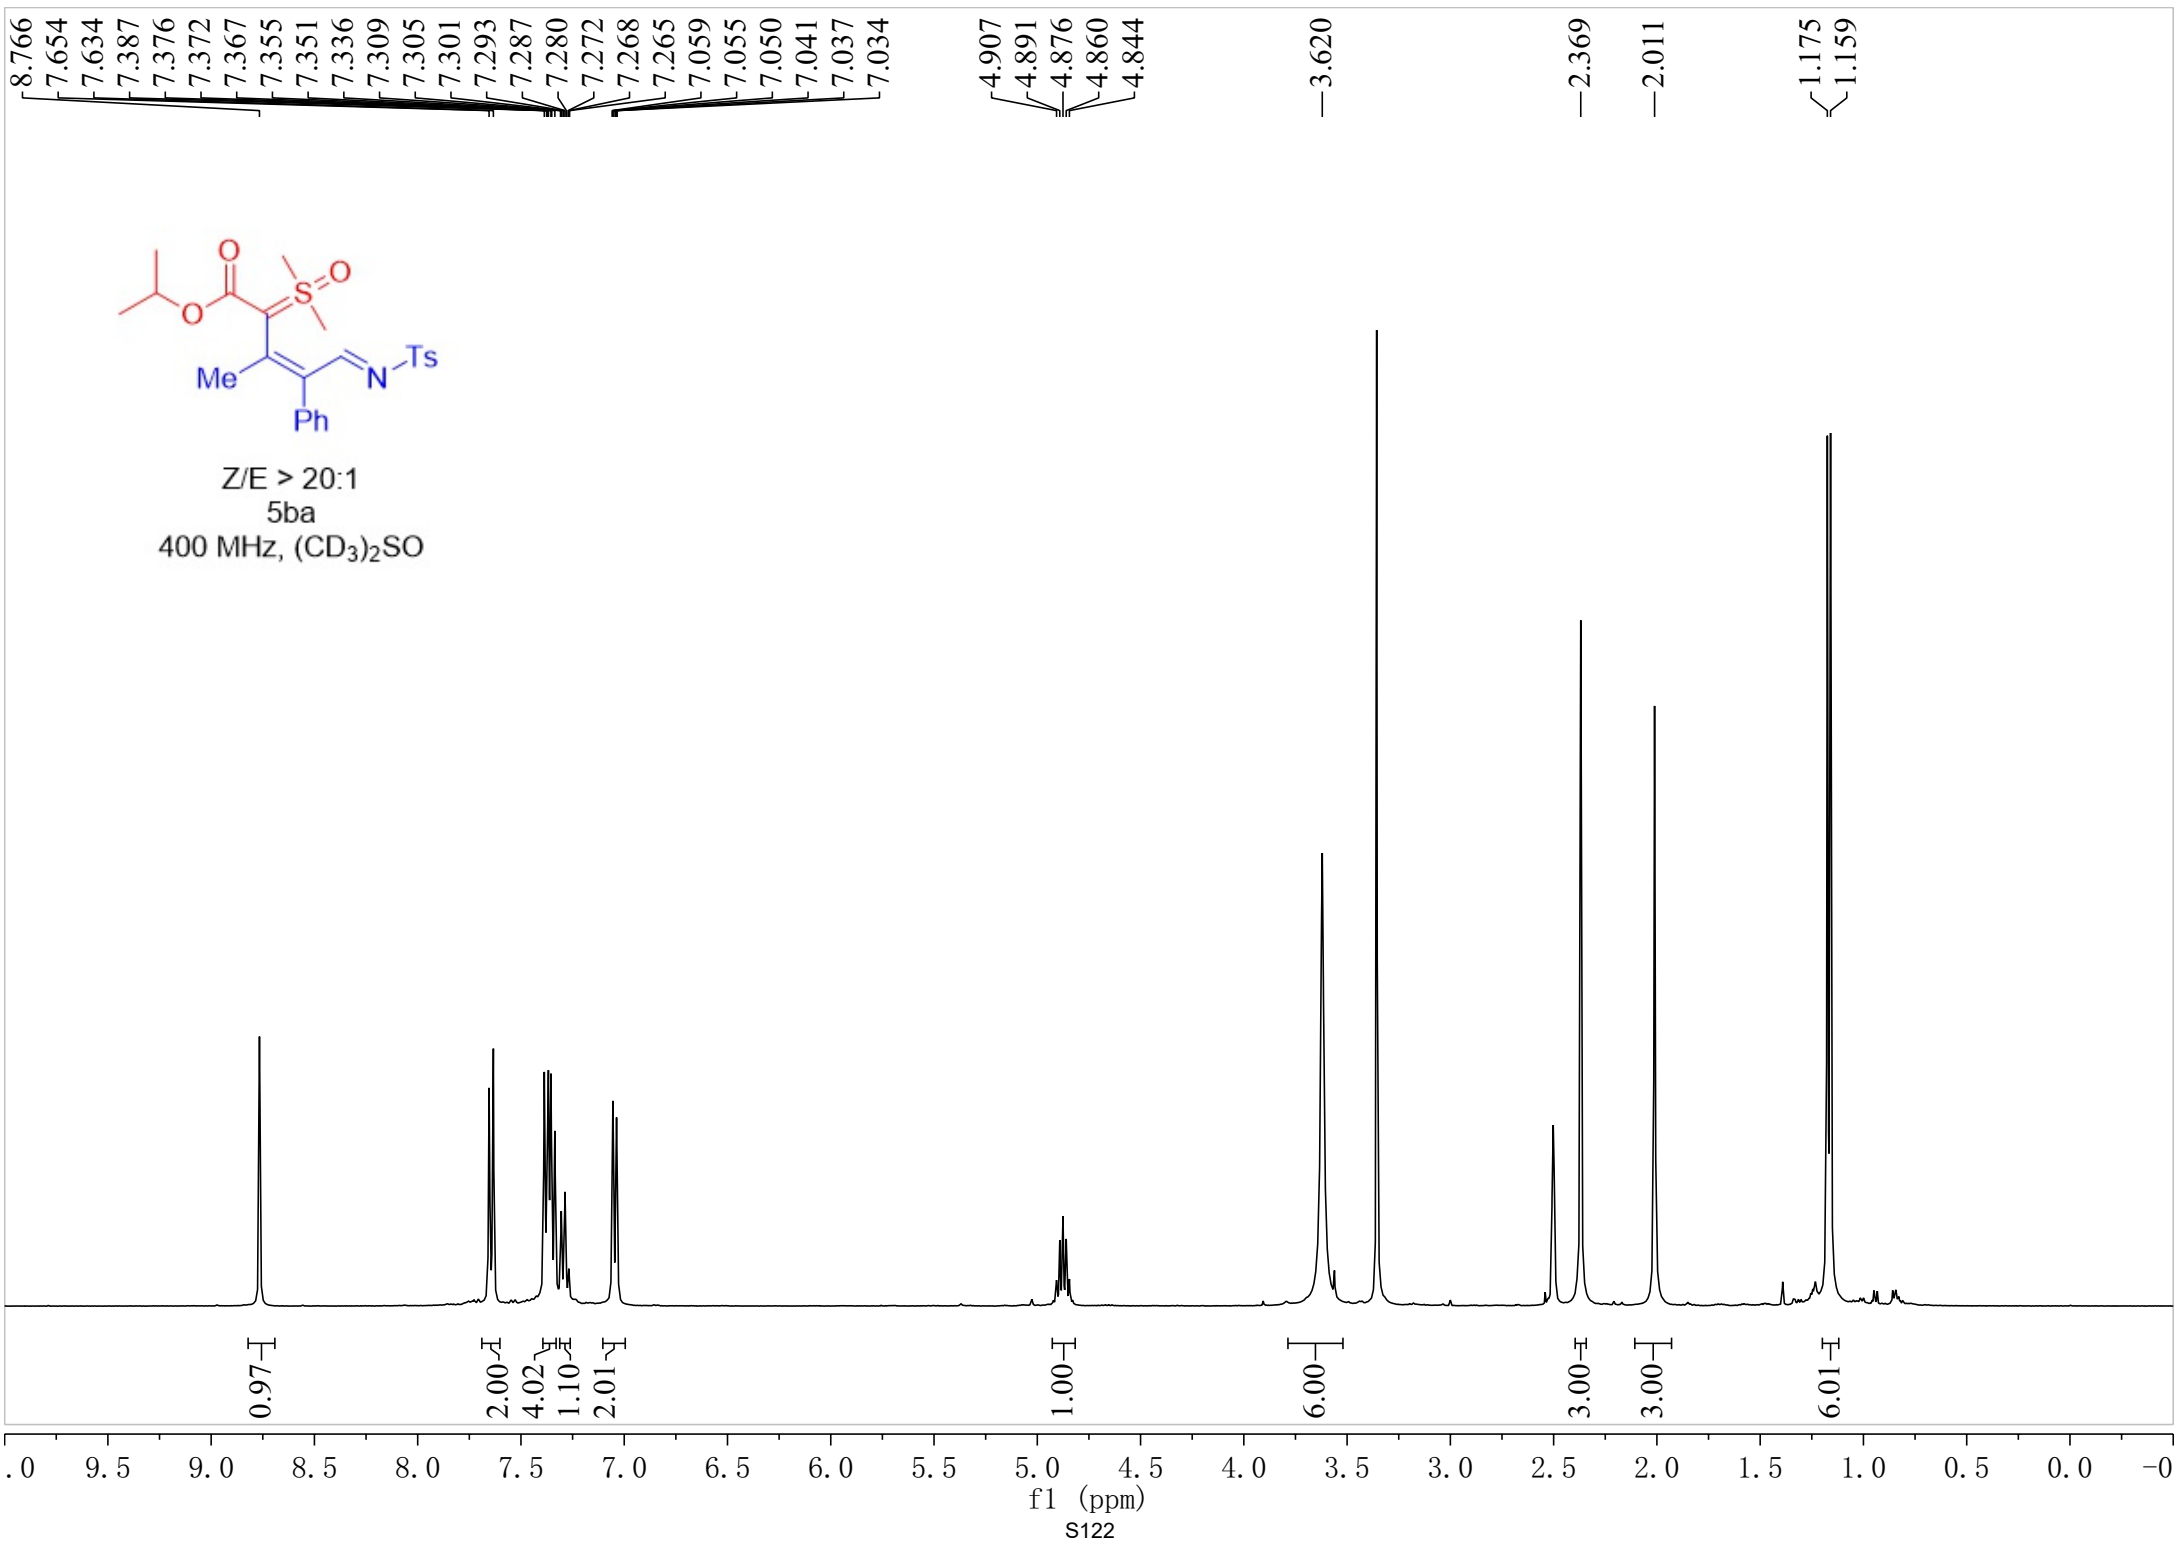

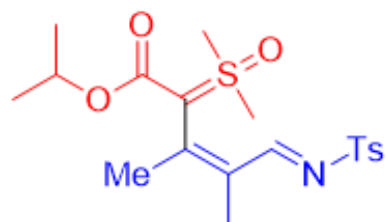

5ba

101 MHz, (CD<sub>3</sub>)<sub>2</sub>CO

—170.00  
—163.95  
—156.10  
144.14  
137.32  
137.07  
136.19  
130.31  
130.21  
128.61  
127.71

—74.13  
—66.51

—43.16

24.70  
22.43  
21.48

10 200 190 180 170 160 150 140 130 120 110 100 90 80 70 60 50 40 30 20 10 0 -1  
f1 (ppm)  
S123

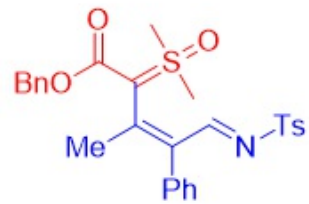

Z/E > 20:1  
5ca  
400 MHz, (CD<sub>3</sub>)<sub>2</sub>SO

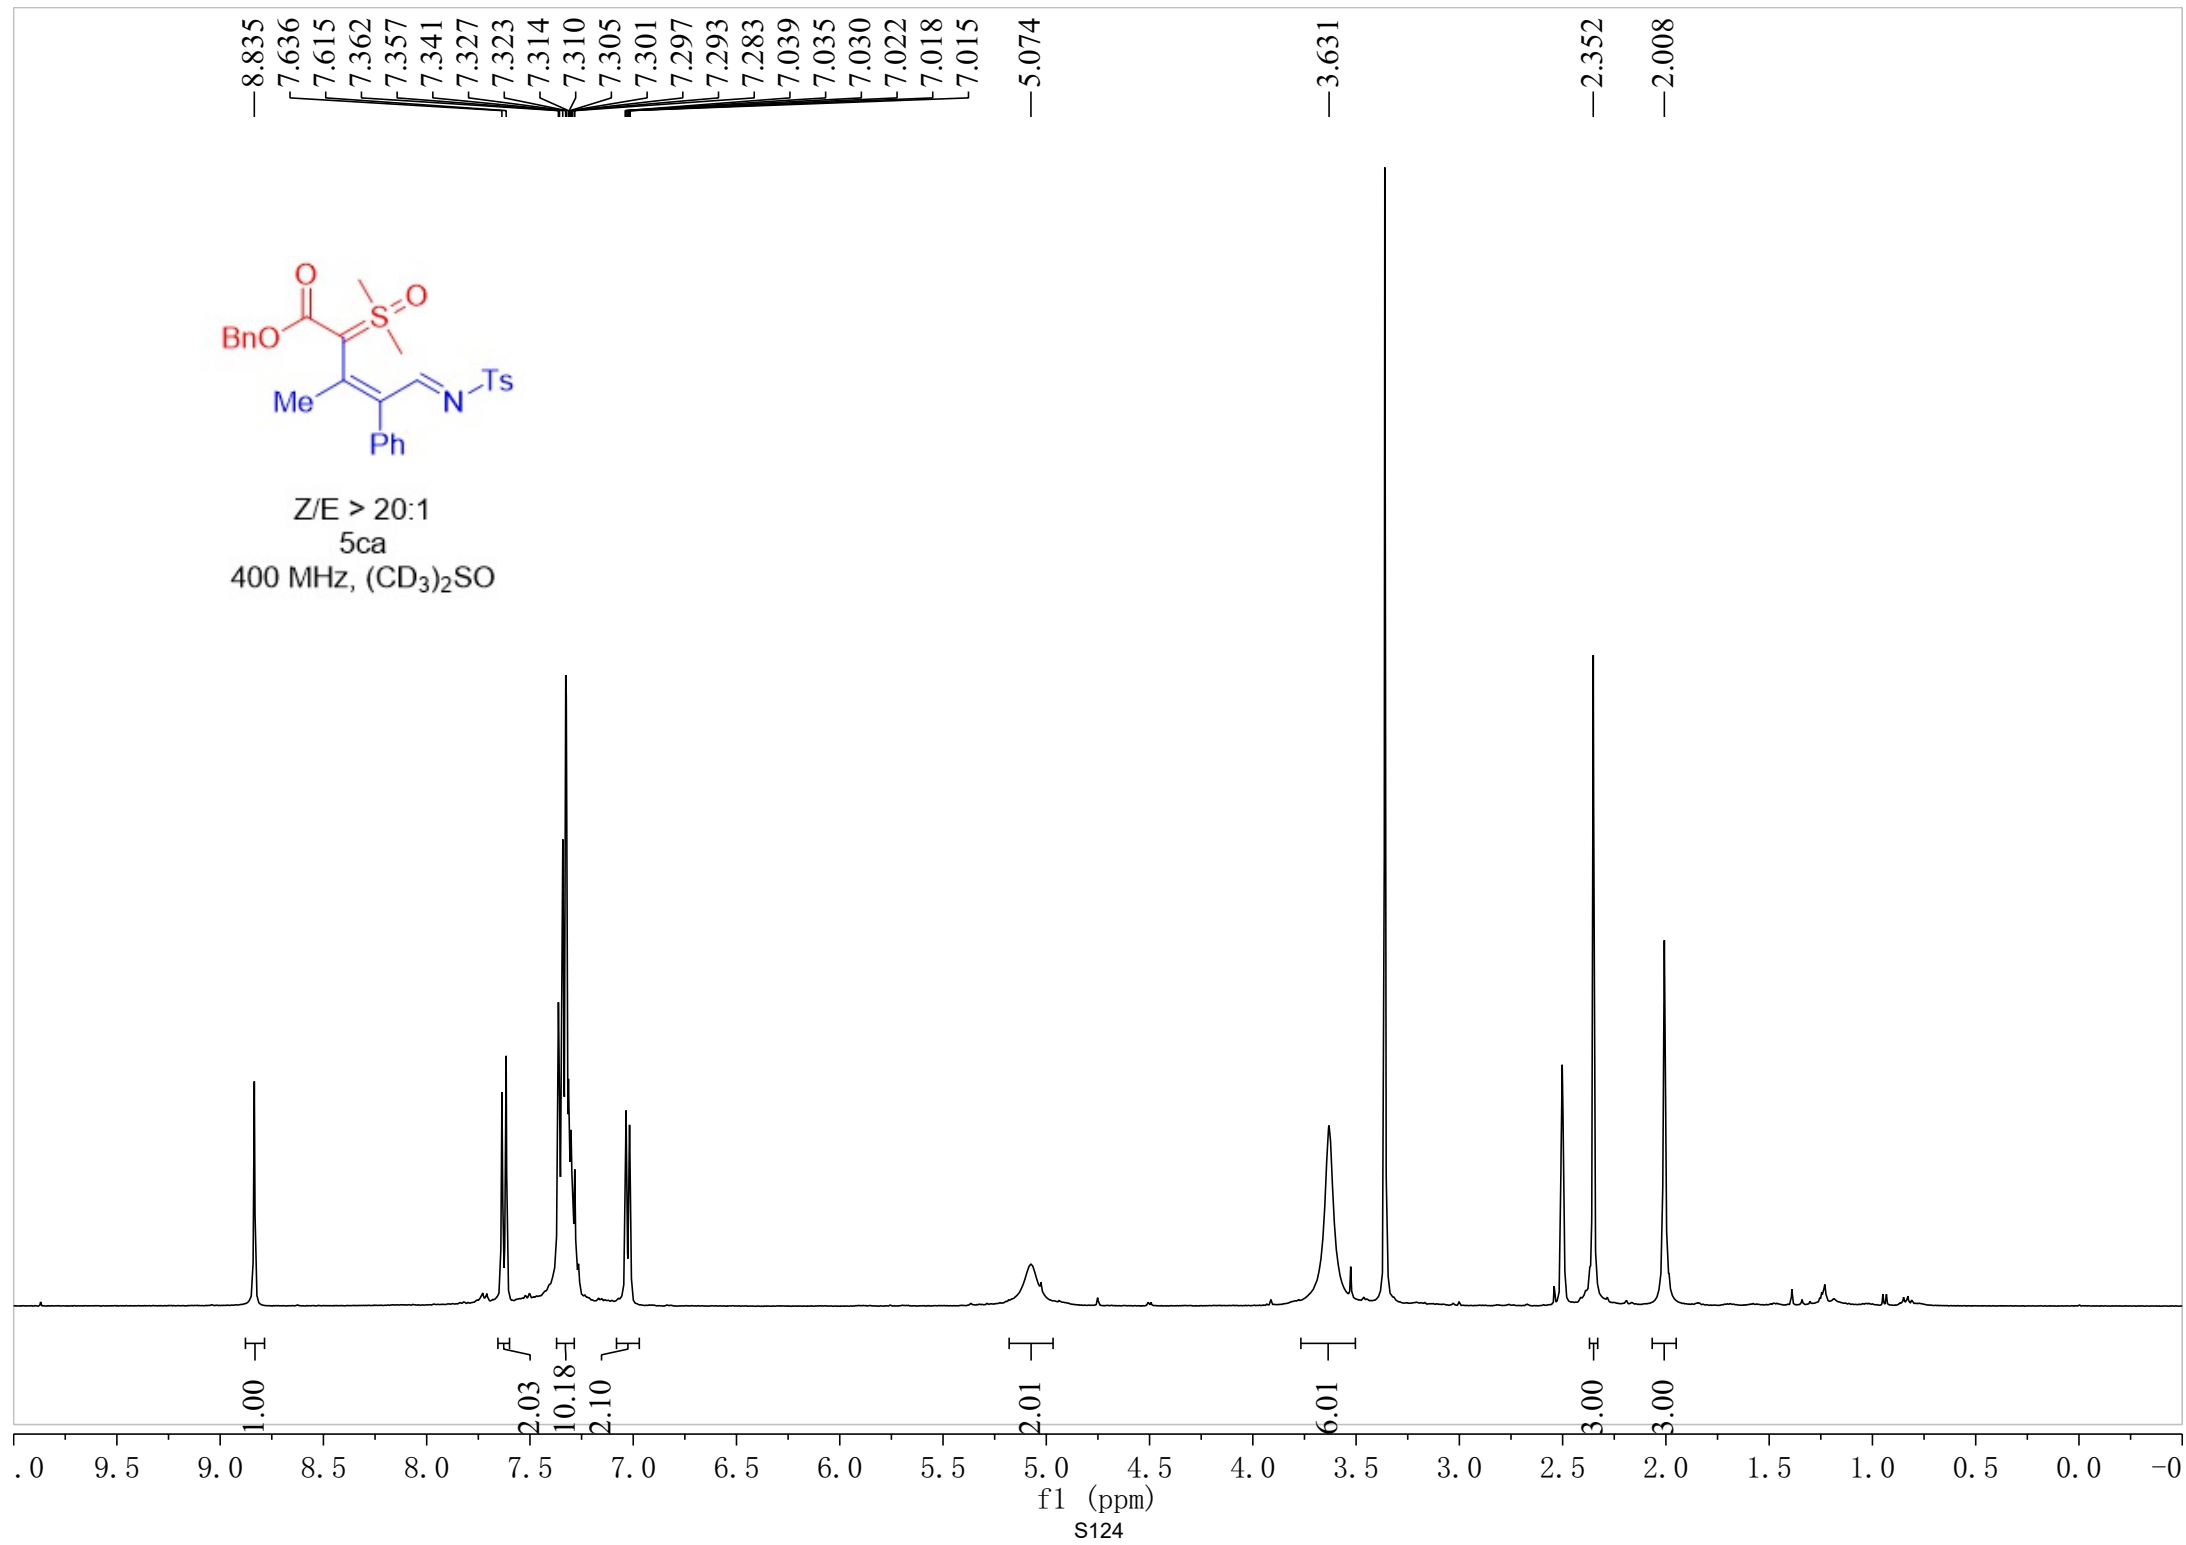

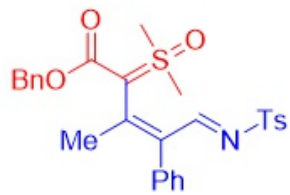

5ca  
101MHz, (CD<sub>3</sub>)<sub>2</sub>SO

170.26  
163.96  
155.68  
144.24  
137.79  
137.41  
137.09  
135.89  
130.27  
130.23  
129.76  
128.83  
128.62  
128.15  
128.00  
127.78

73.66

64.89

42.83

24.89

21.48

00 190 180 170 160 150 140 130 120 110 100 90 80 70 60 50 40 30 20 10 0 -1

f1 (ppm)

S125

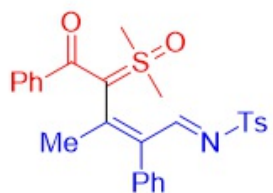

Z/E > 20:1  
5da  
400 MHz, (CD<sub>3</sub>)<sub>2</sub>SO

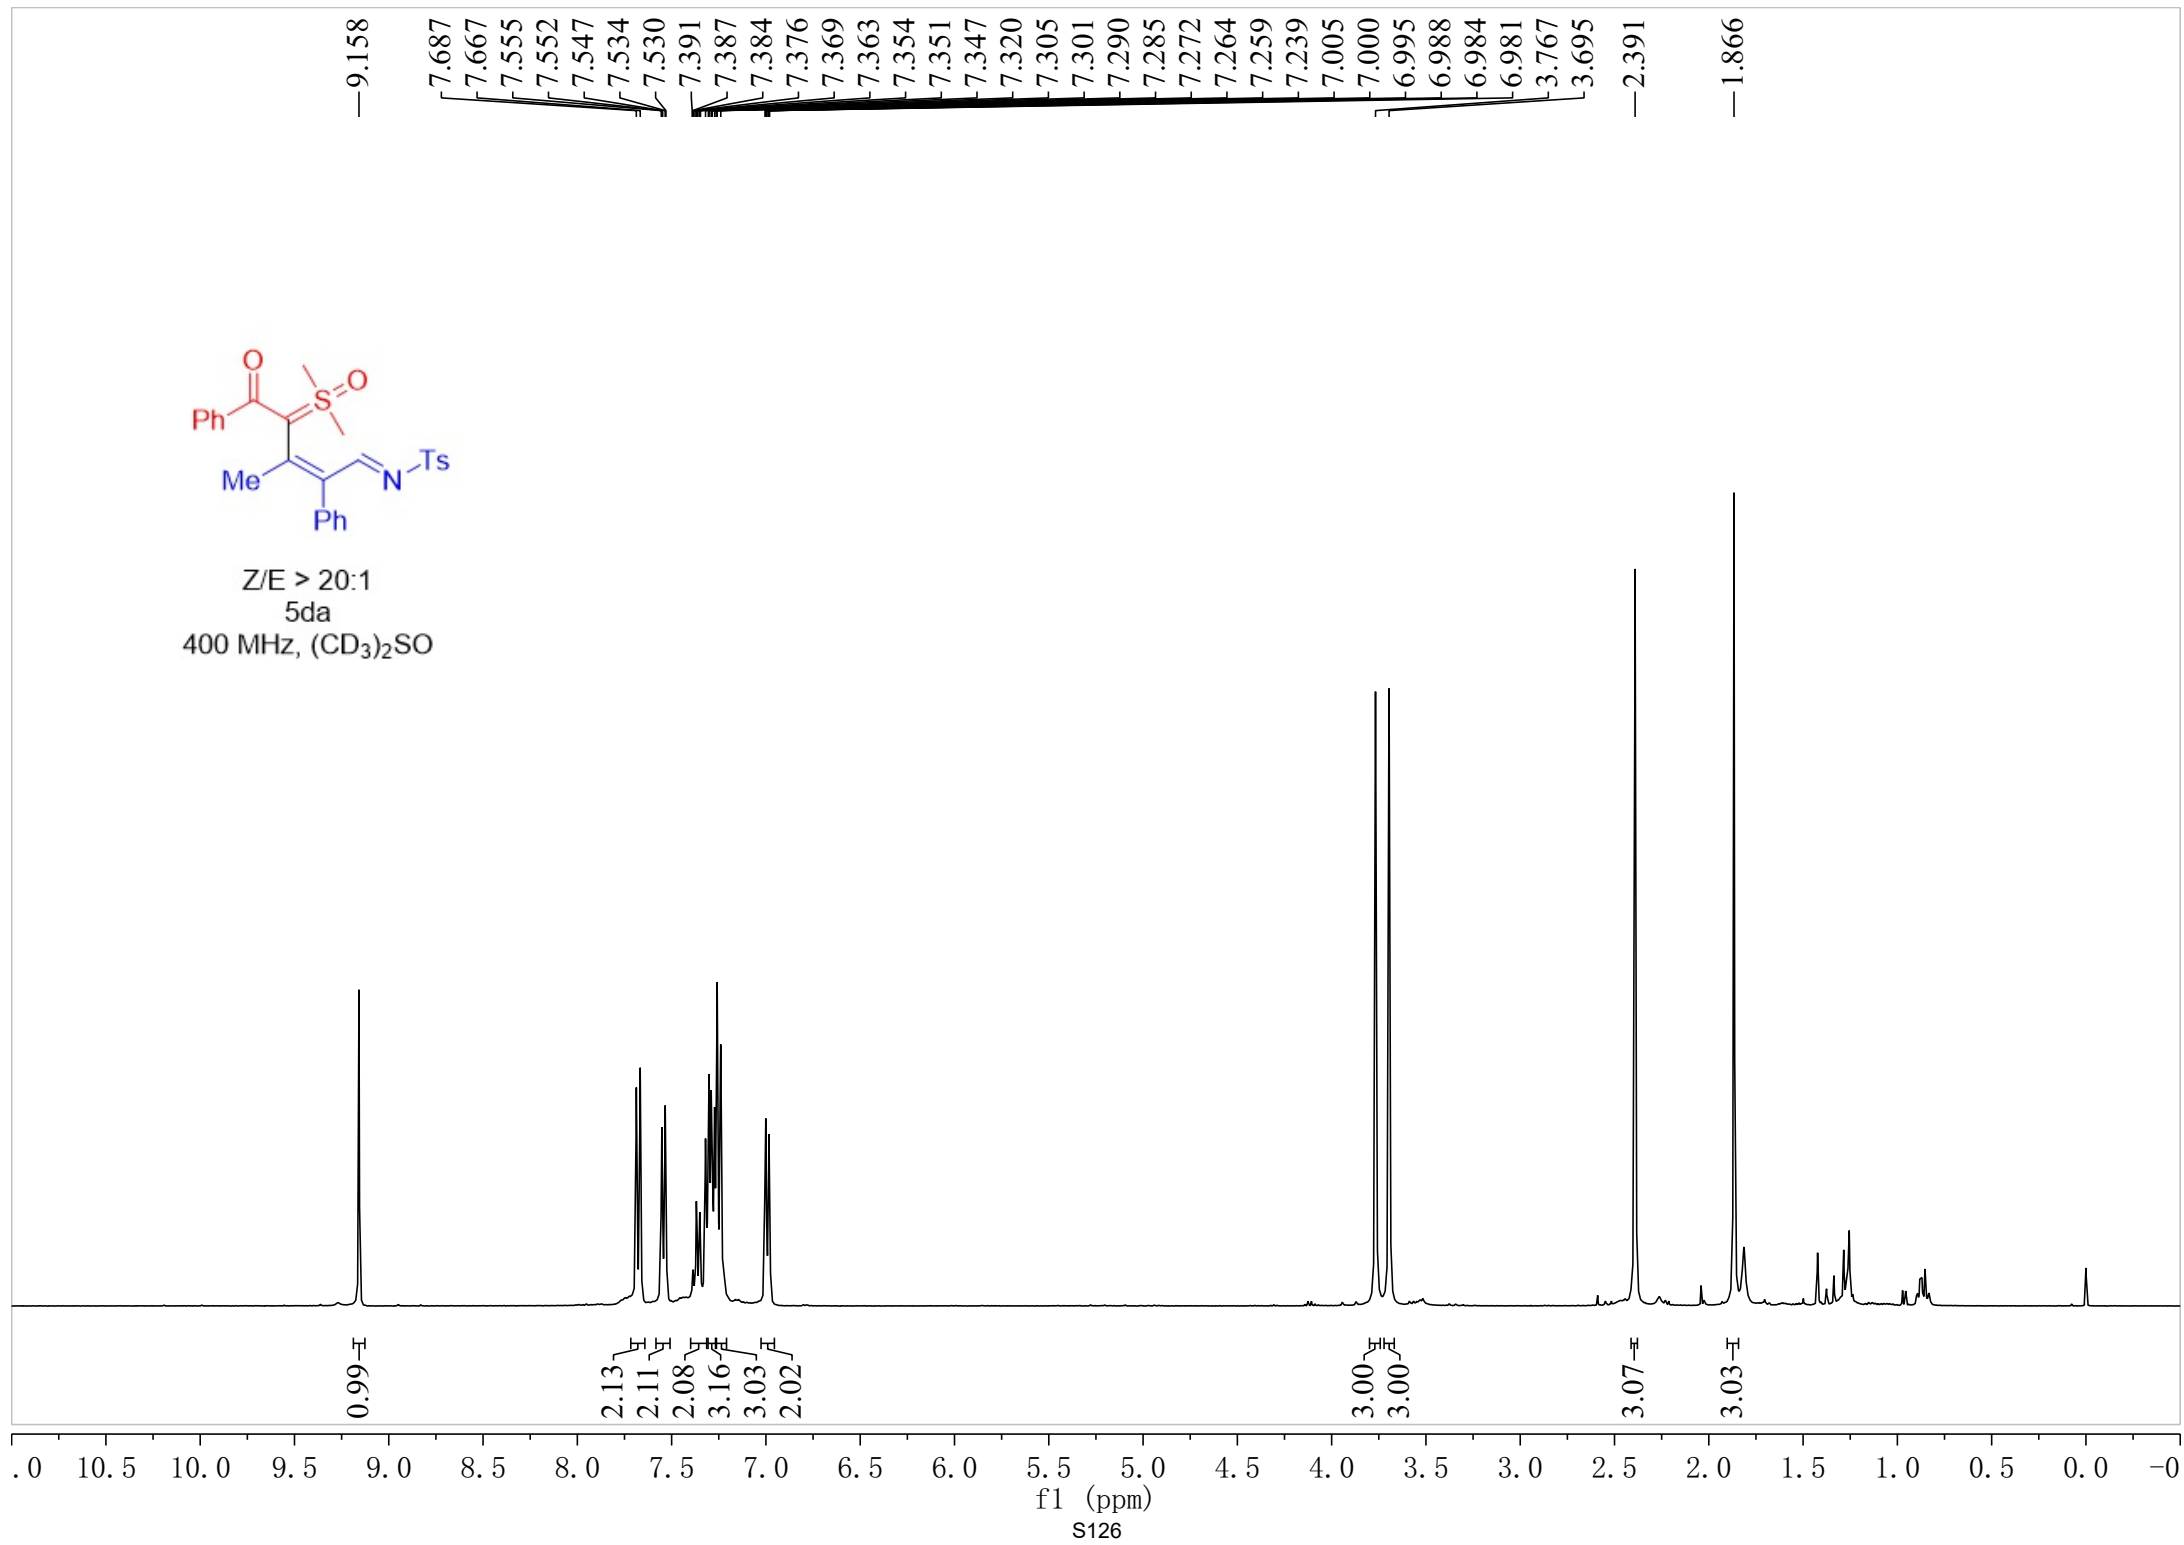

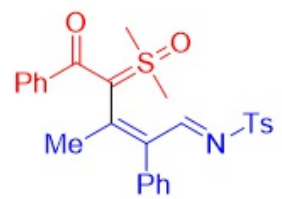

5da  
101 MHz, (CD<sub>3</sub>)<sub>2</sub>SO

- 184.68
- 169.65
- 152.32
- 143.71
- 143.07
- 140.32
- 140.09
- 136.12
- 136.04
- 130.63
- 129.56
- 129.49
- 128.32
- 128.14
- 127.62
- 127.54
- 86.61
- 43.87
- 42.99
- 26.56
- 21.62

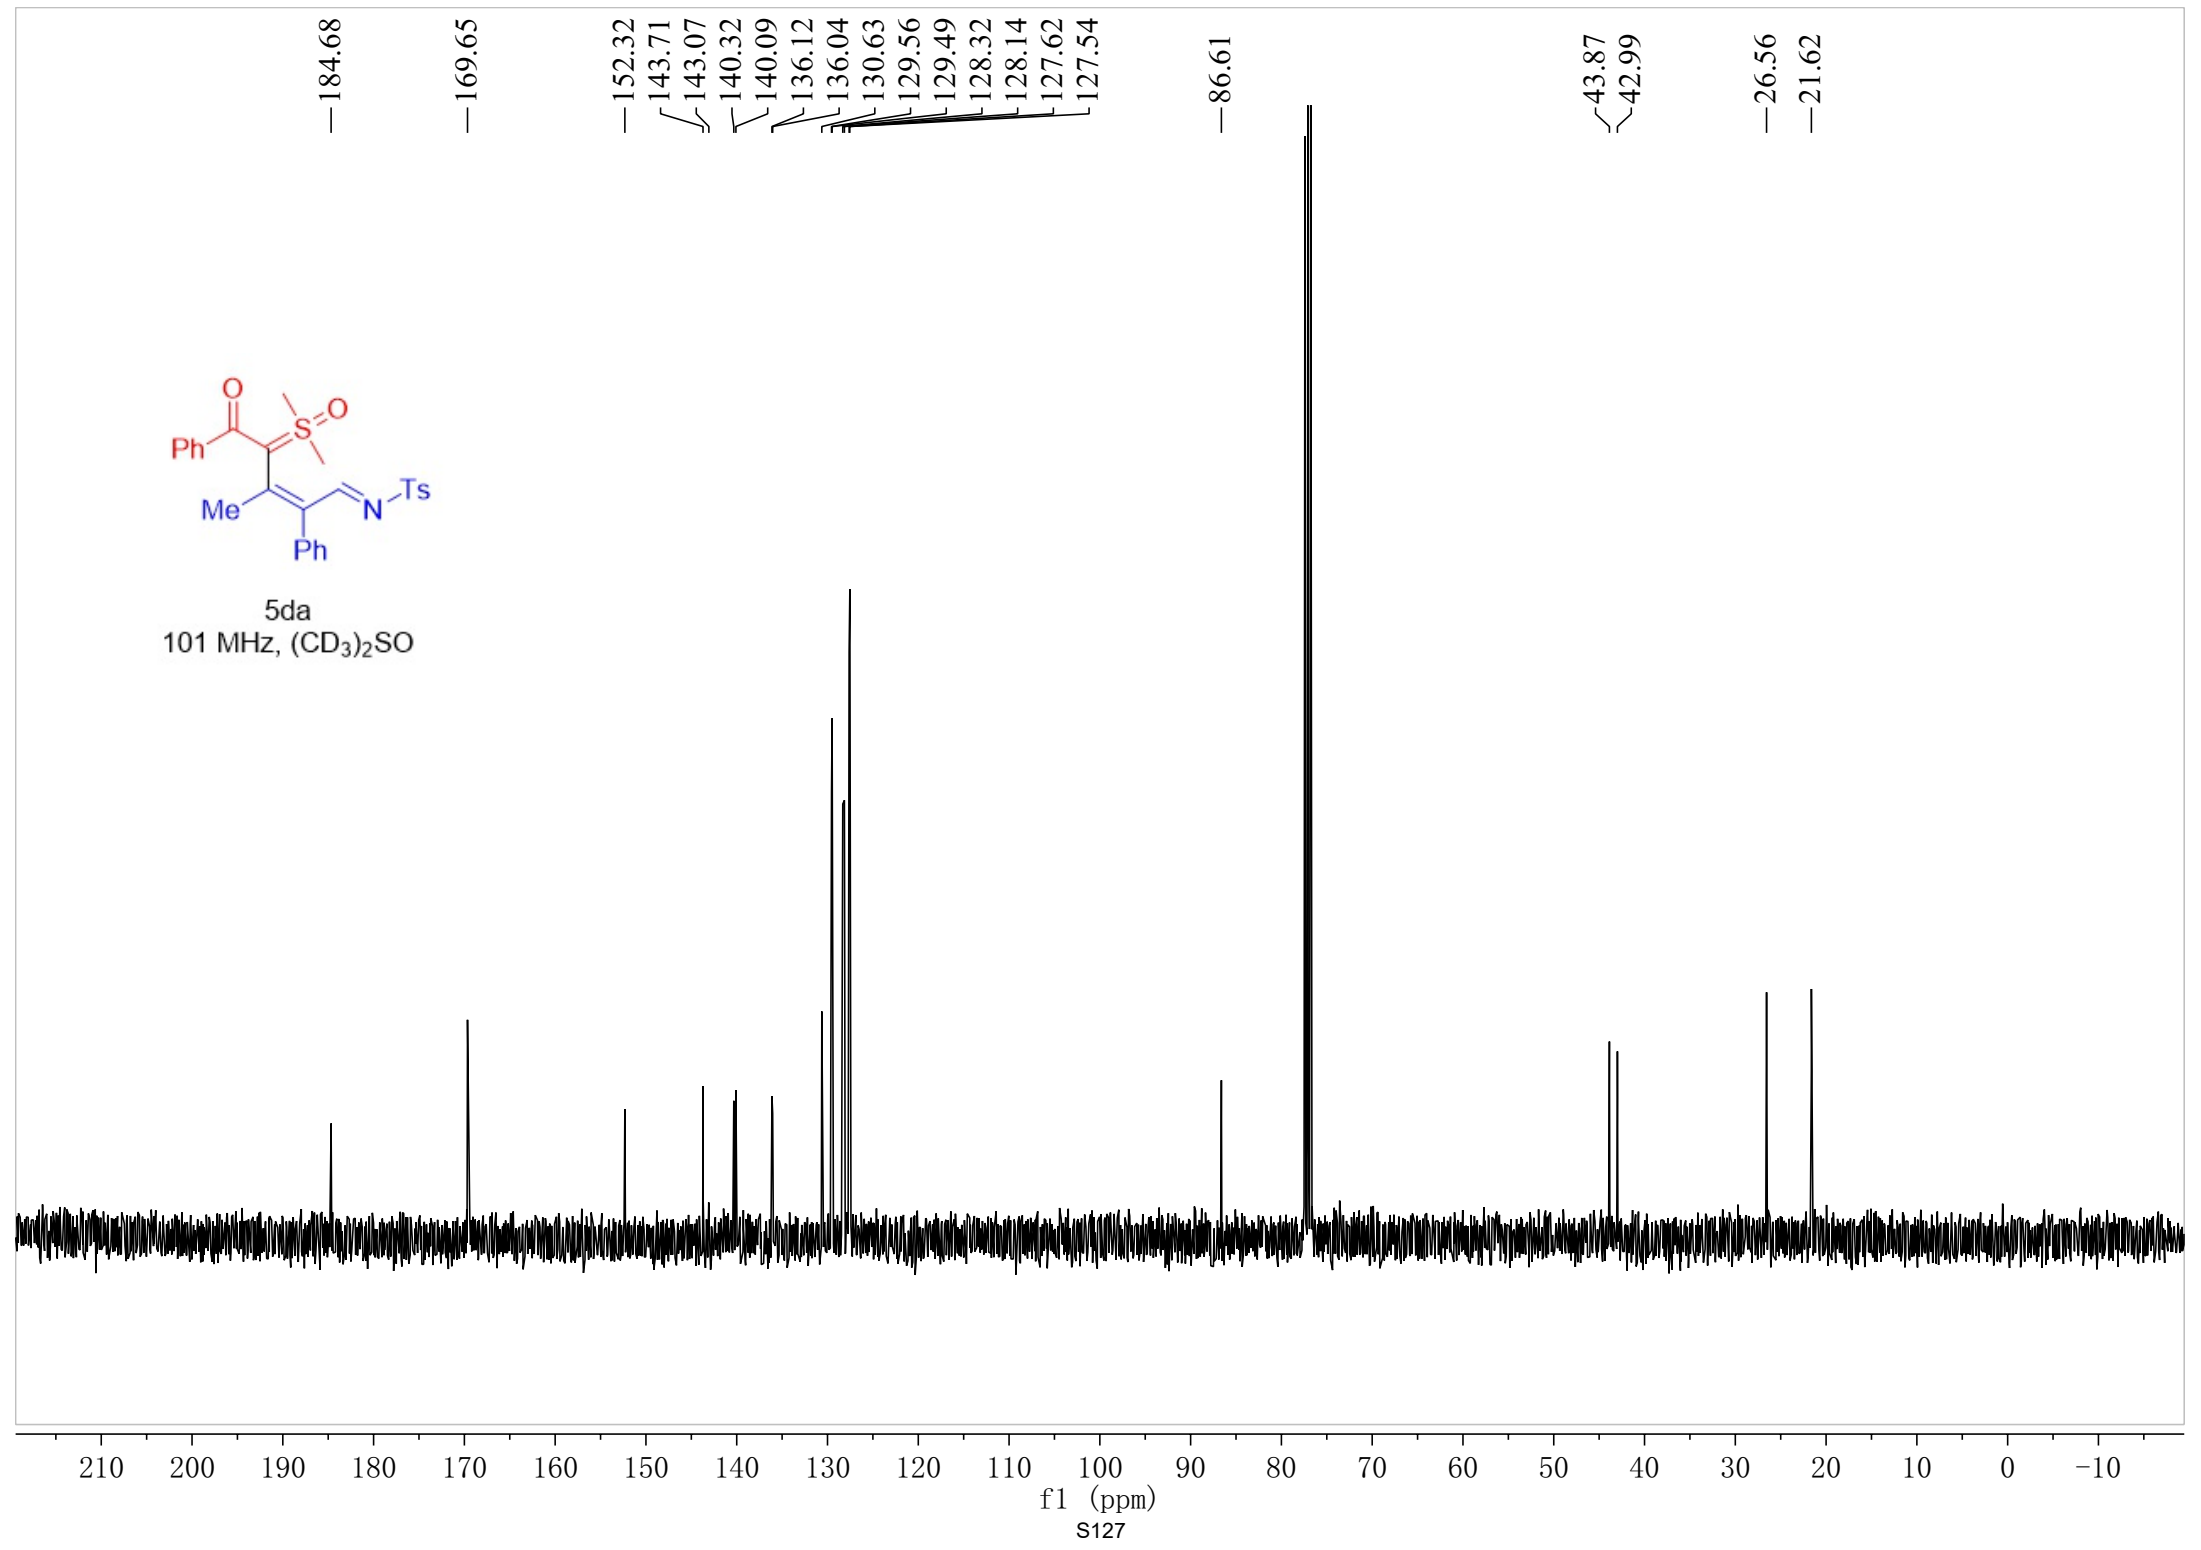

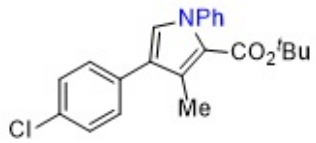

6  
400 MHz, CDCl<sub>3</sub>

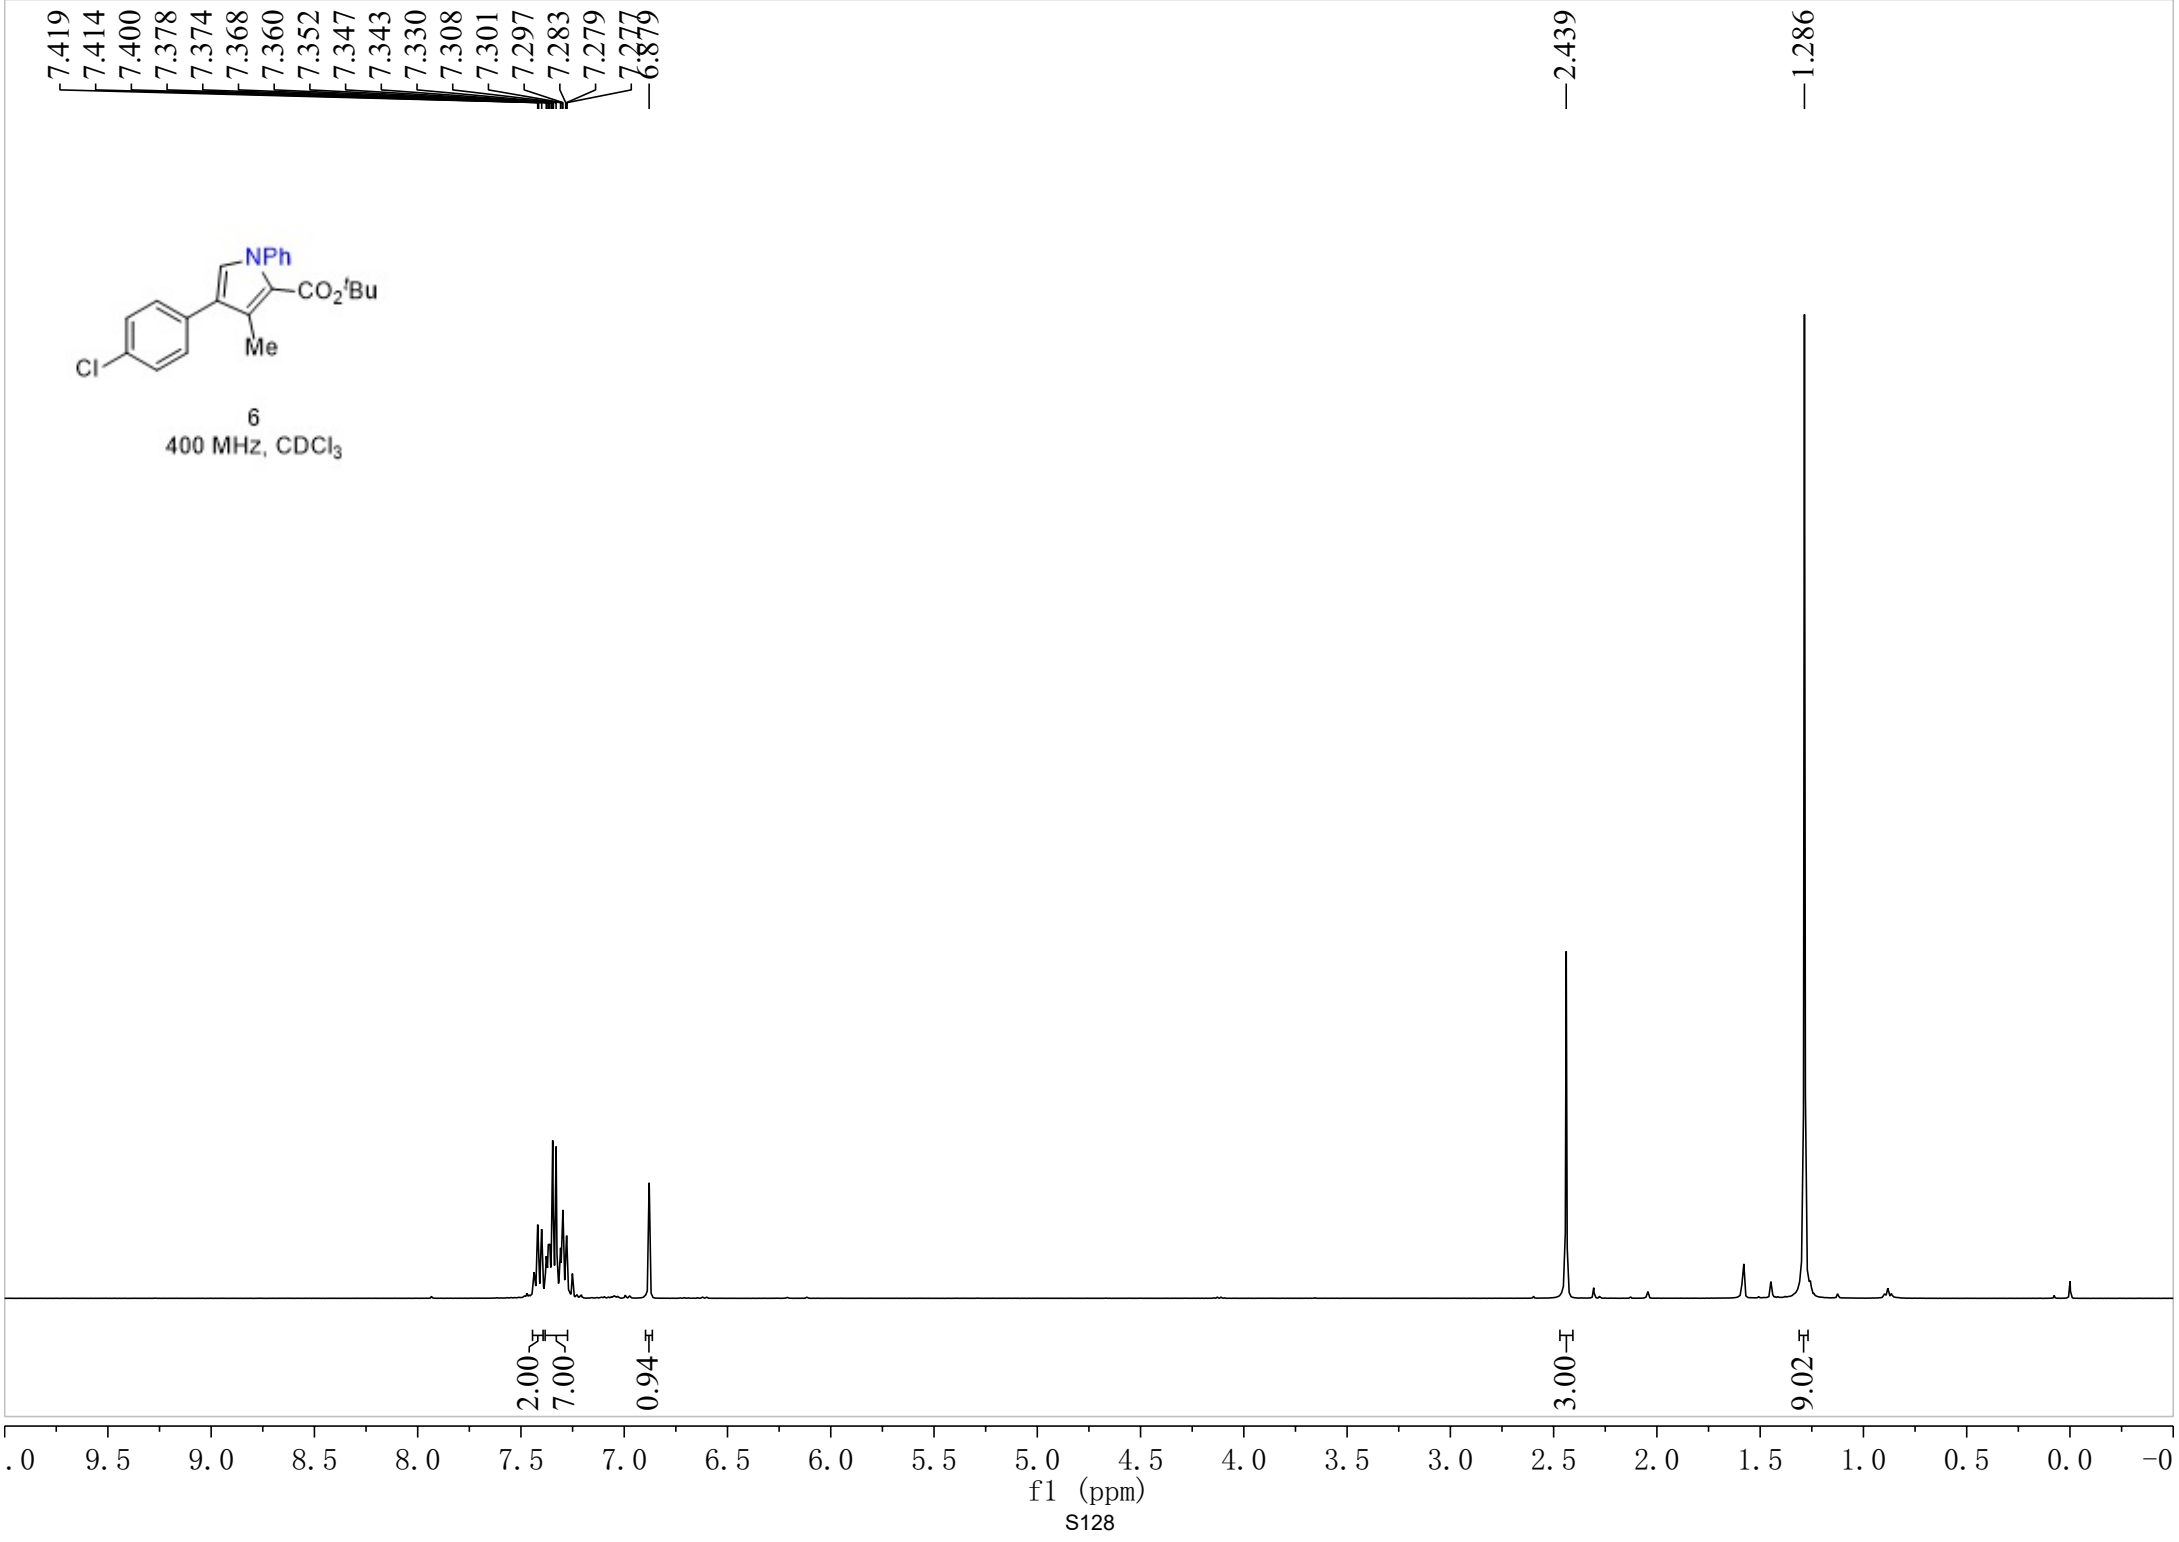

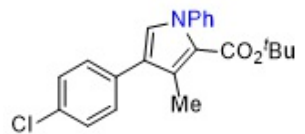

6  
101 MHz, CDCl<sub>3</sub>

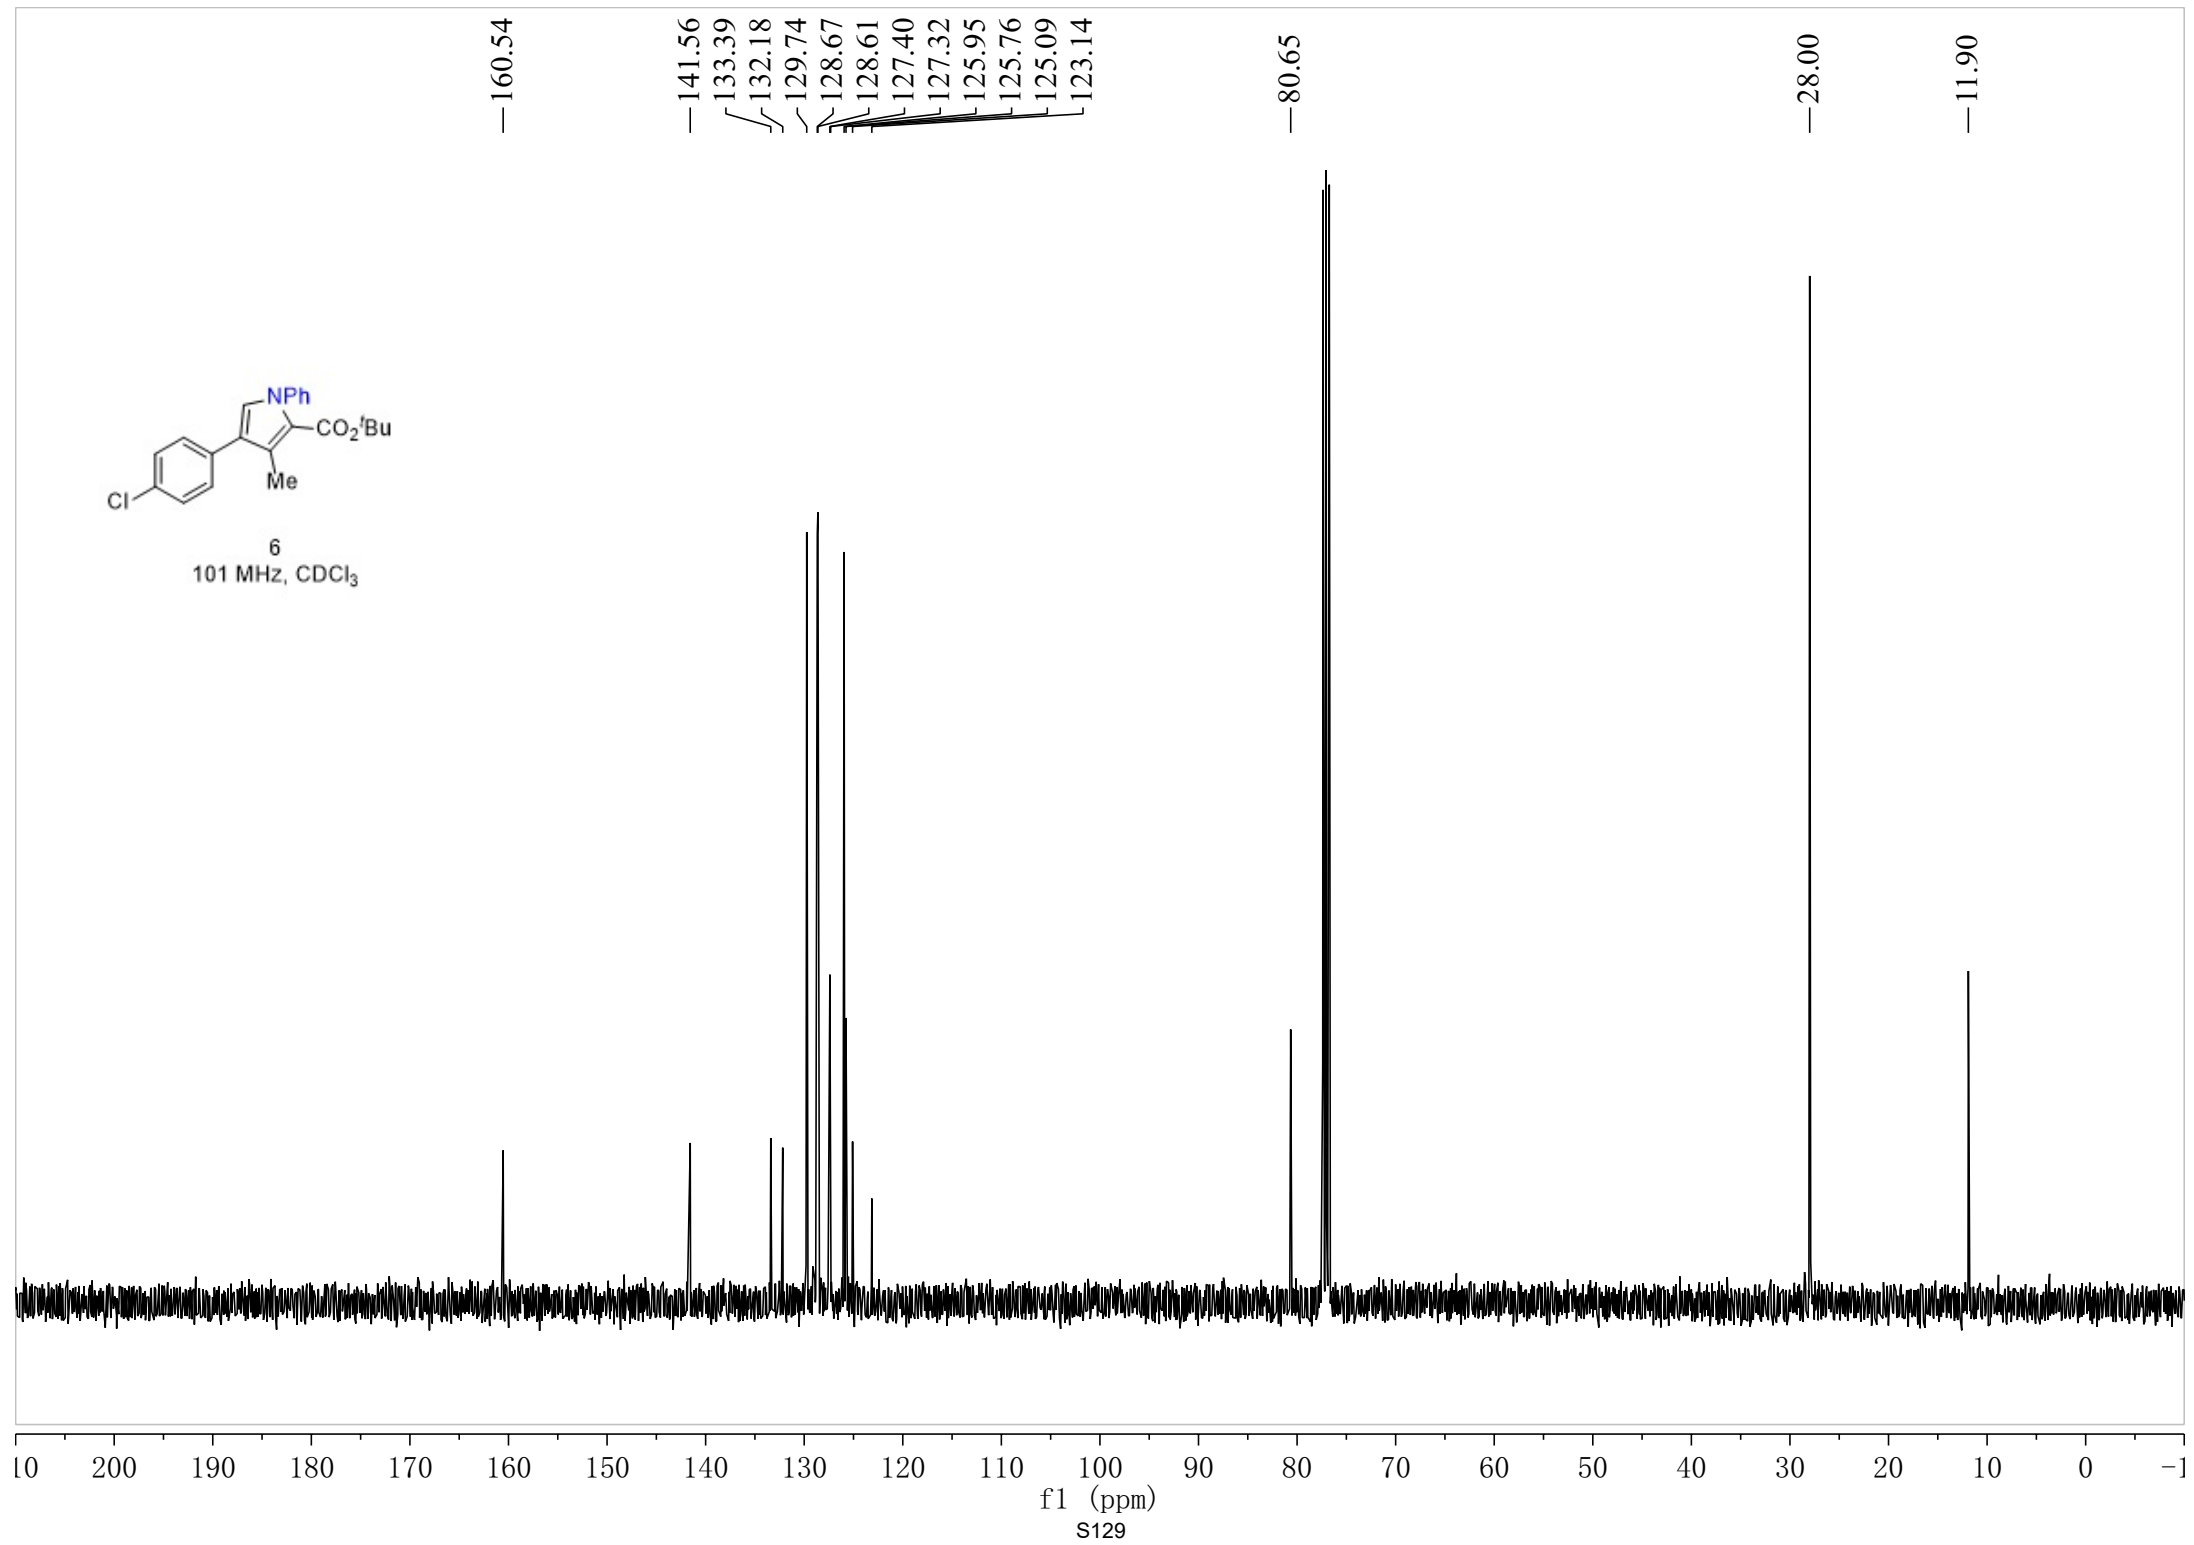

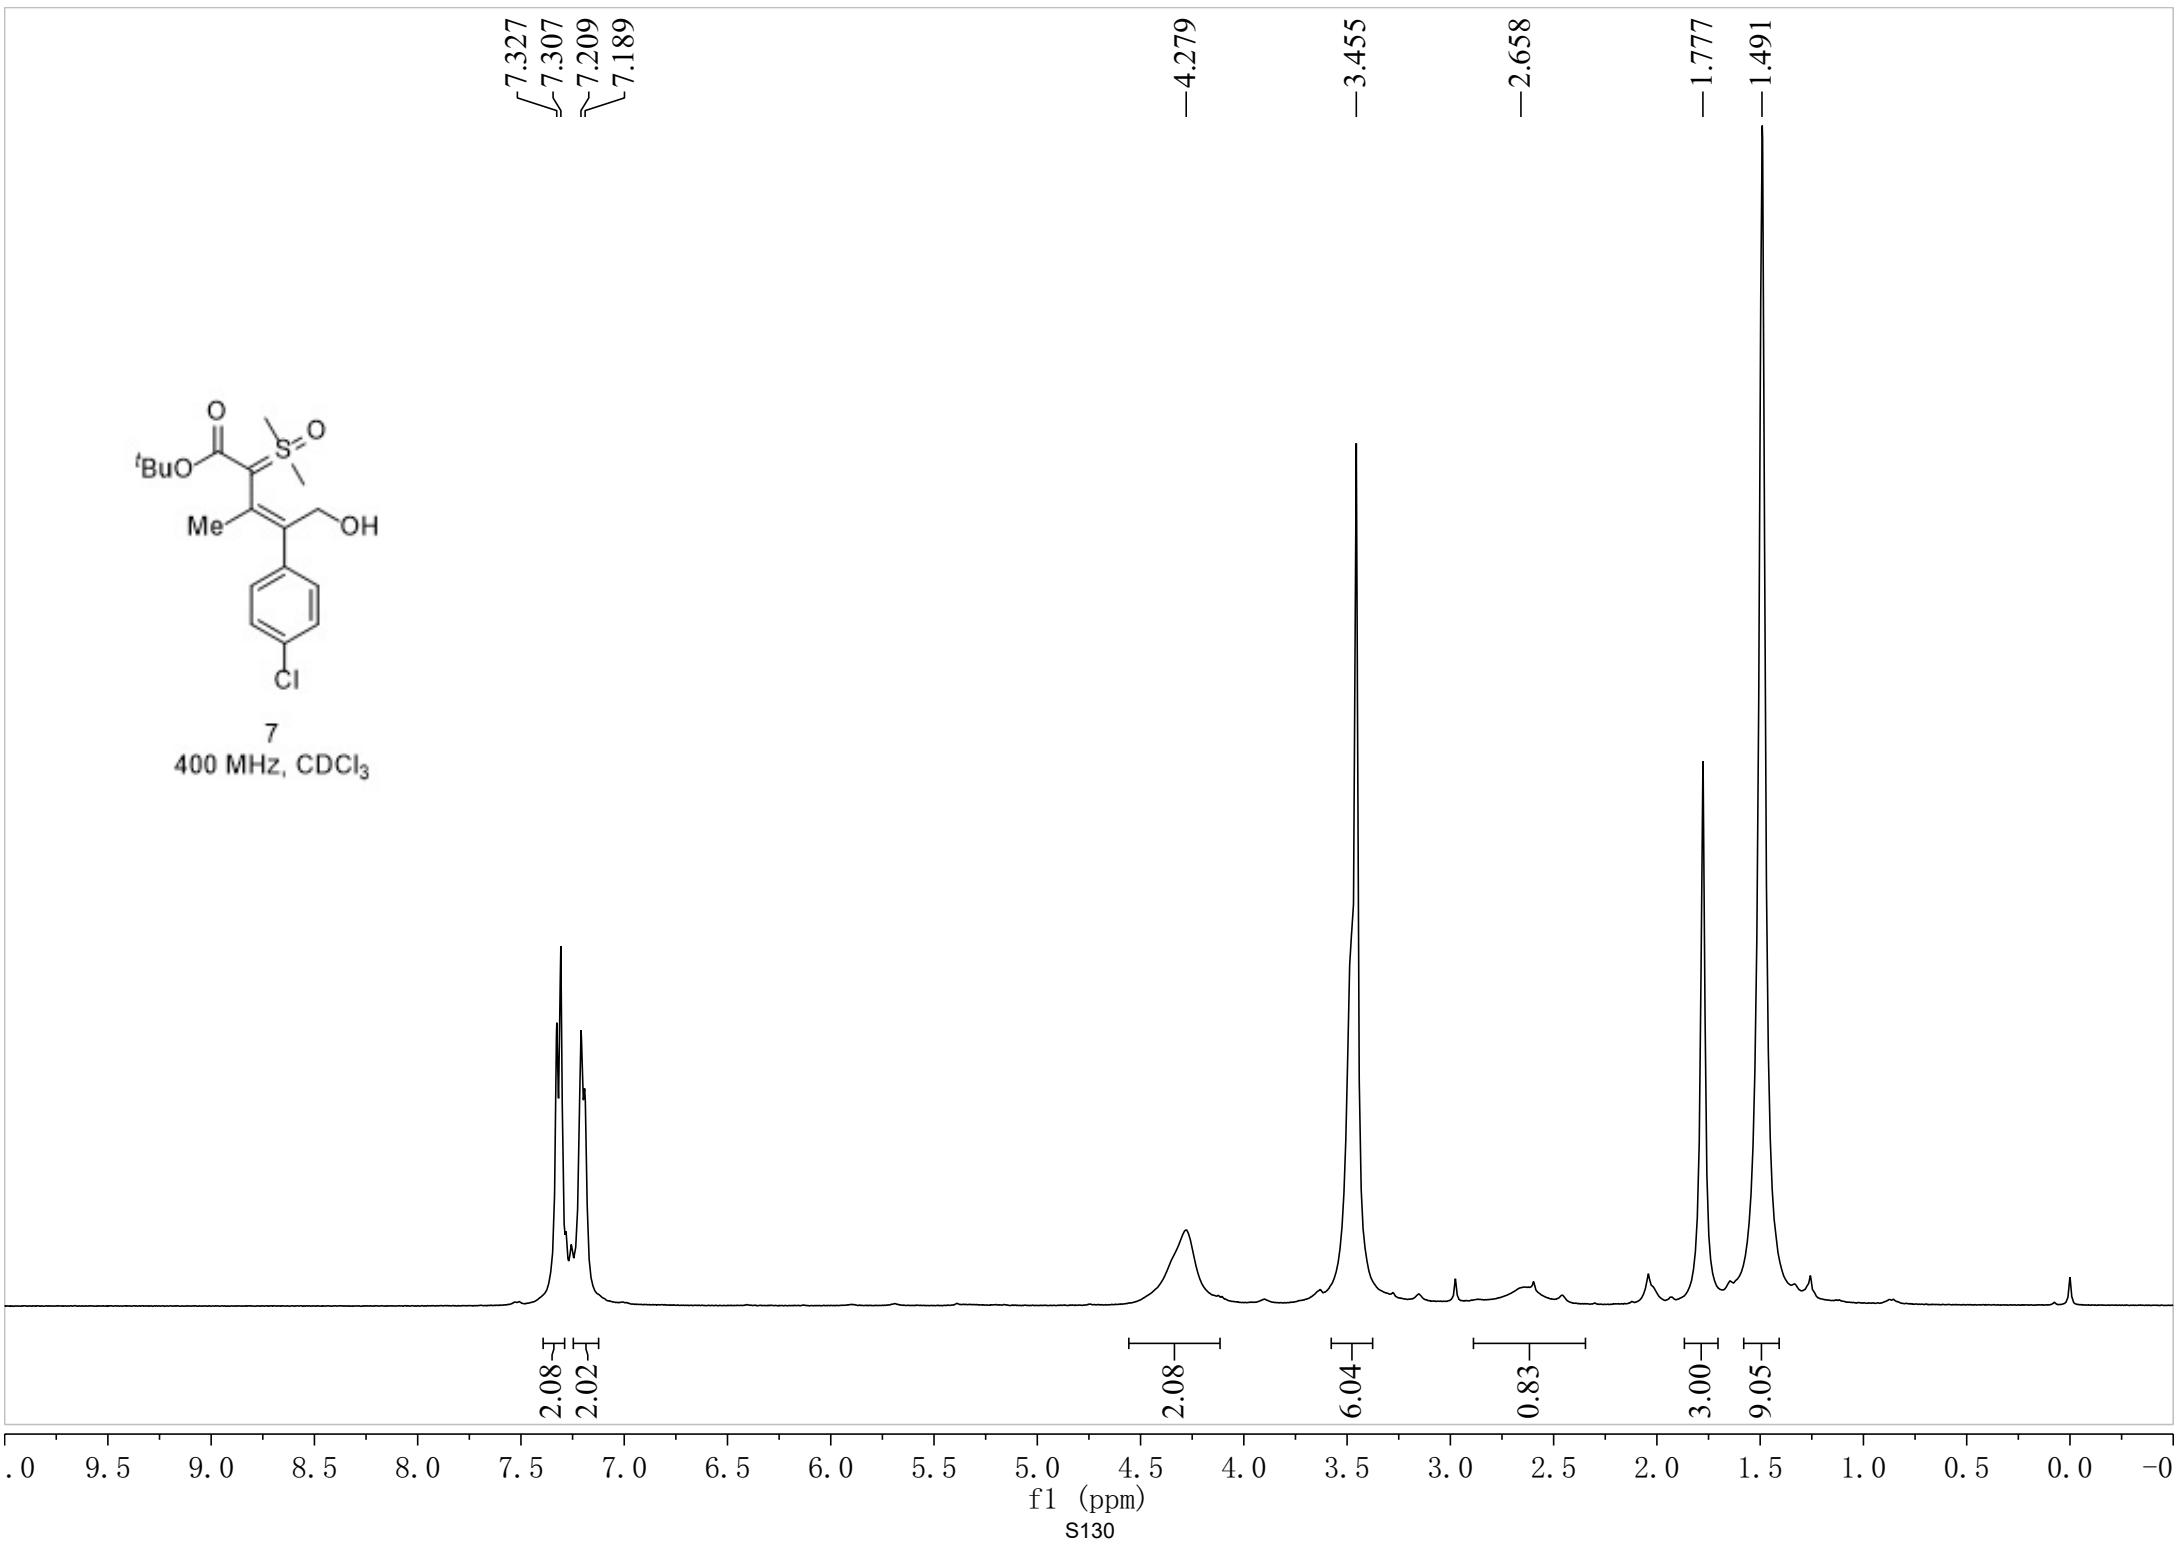

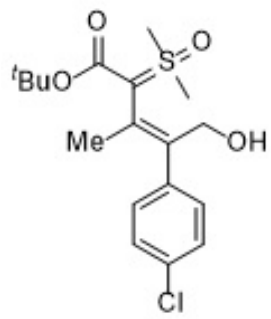

7

101 MHz, CDCl<sub>3</sub>

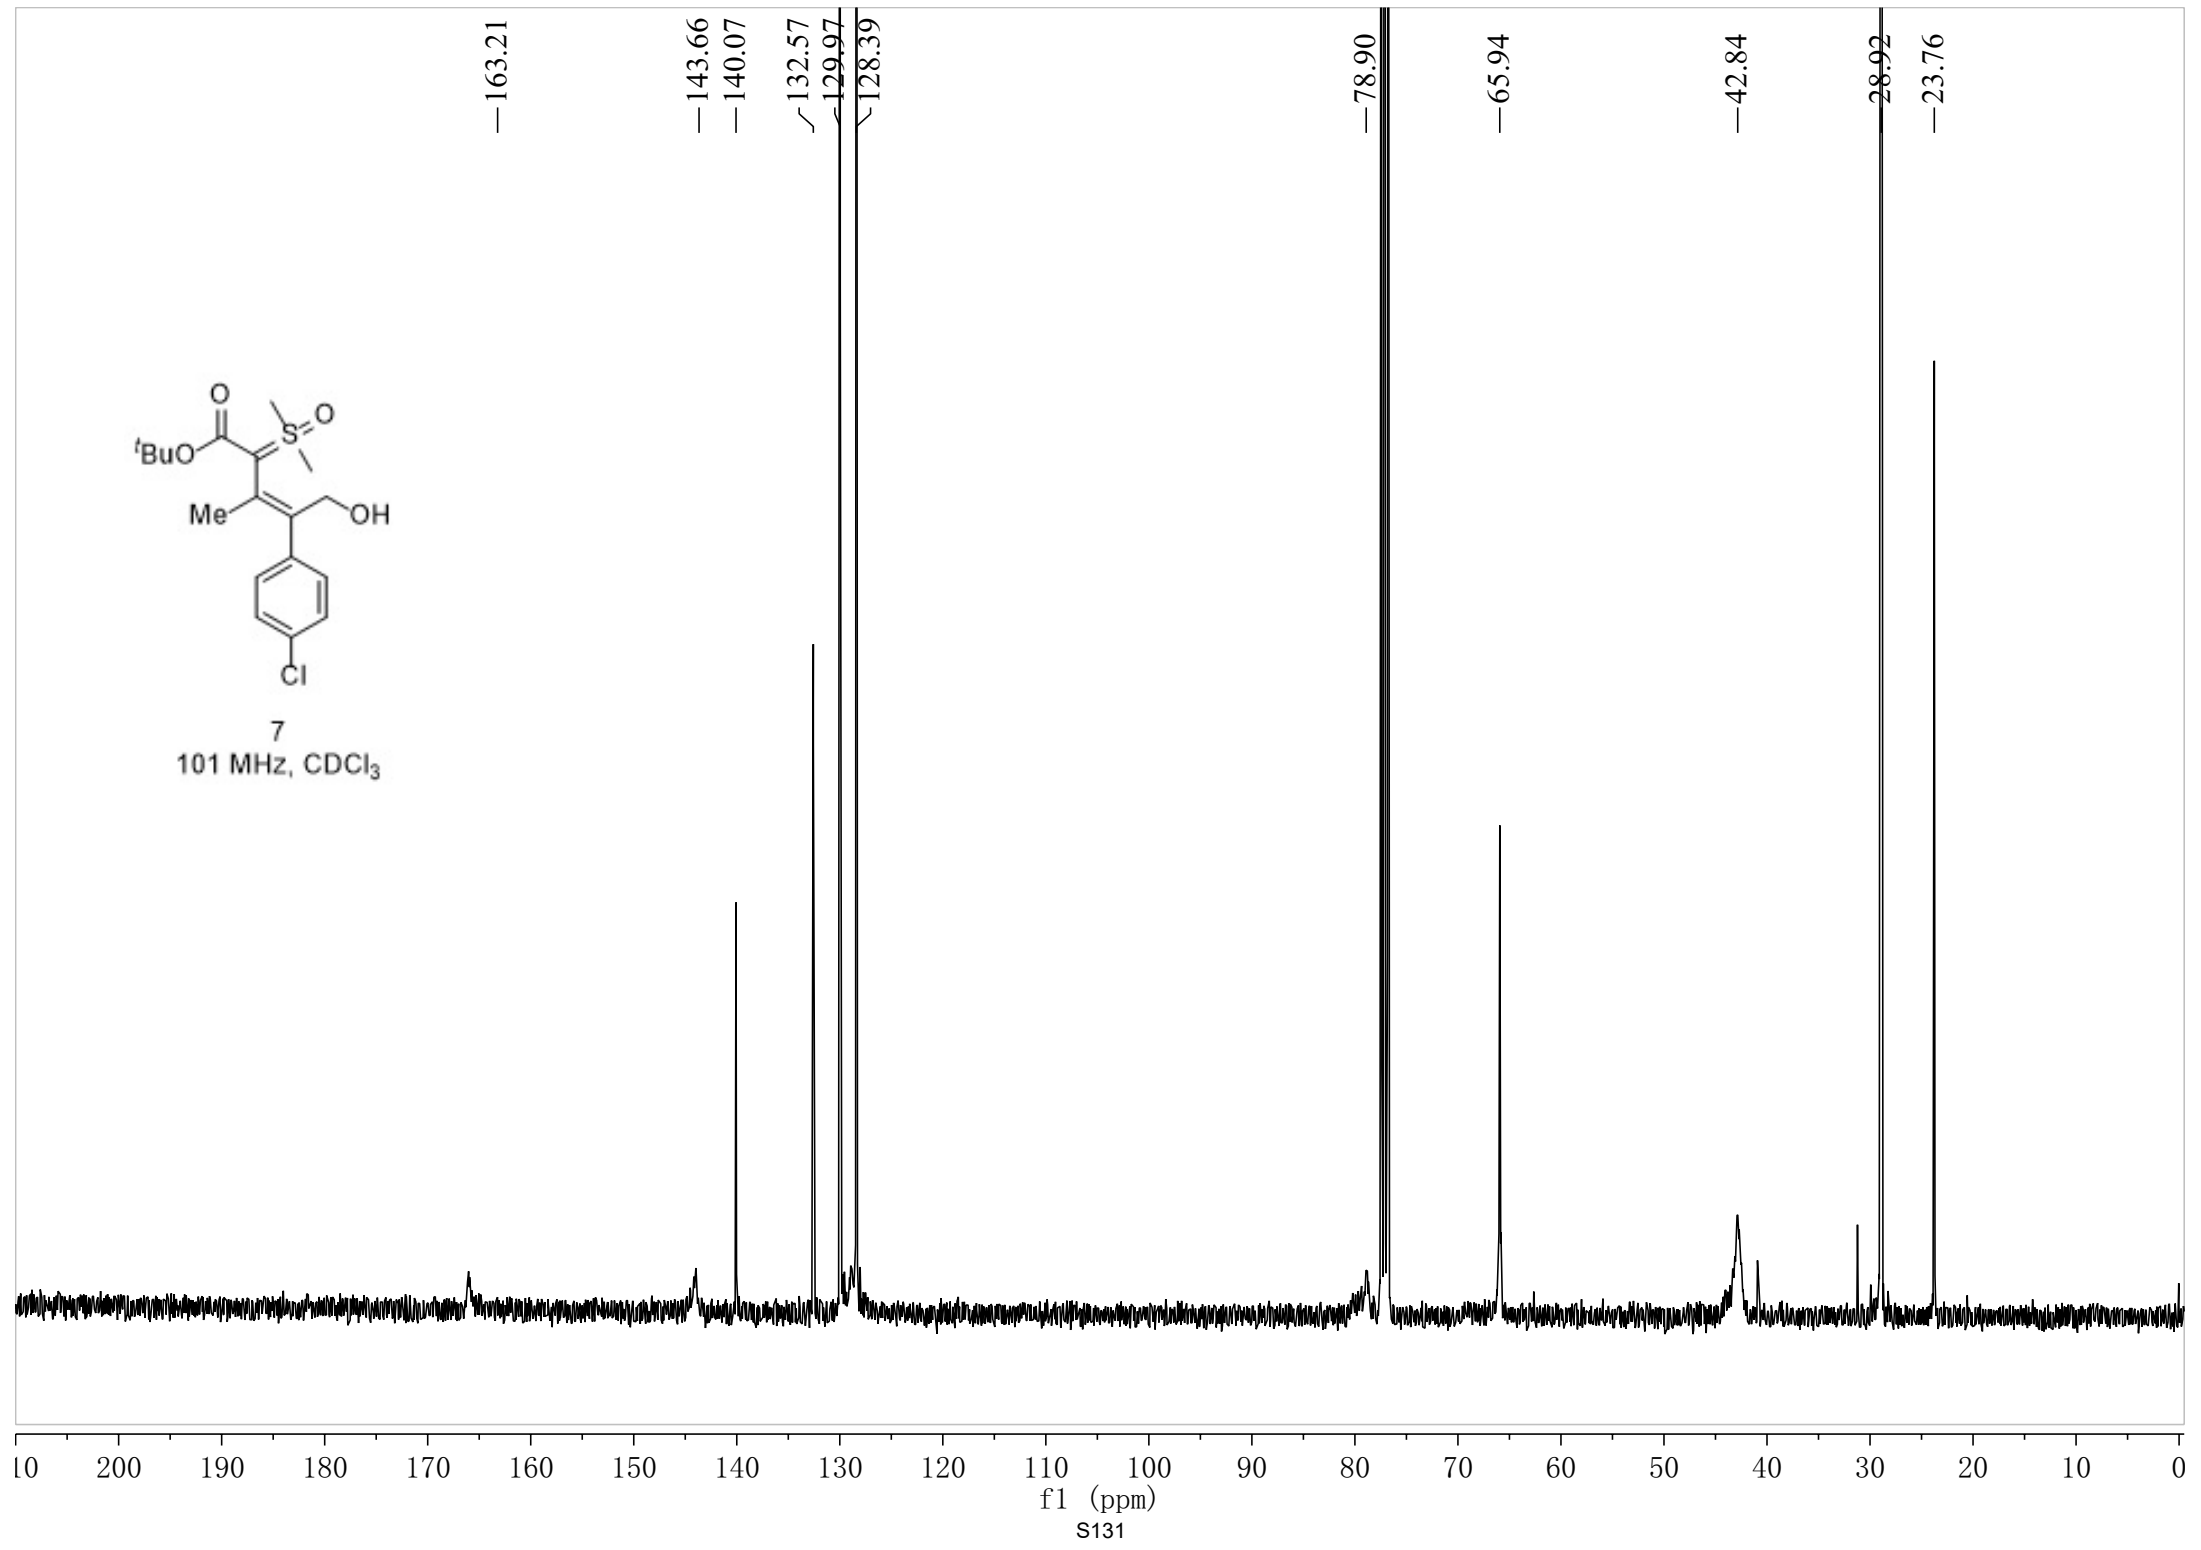

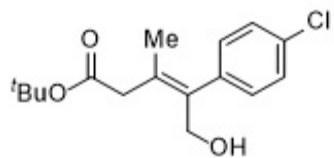

8  
400 MHz, CDCl<sub>3</sub>

7.329  
7.322  
7.318  
7.306  
7.301  
7.295  
7.208  
7.202  
7.197  
7.186  
7.181  
7.175

4.304  
4.291

3.235

2.836

1.689

1.485

1.0 9.5 9.0 8.5 8.0 7.5 7.0 6.5 6.0 5.5 5.0 4.5 4.0 3.5 3.0 2.5 2.0 1.5 1.0 0.5 0.0

f1 (ppm)

S132

2.00

2.00

2.07

2.06

1.02

3.00

9.09

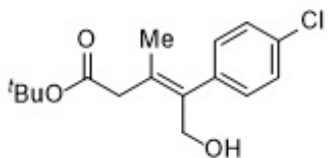

8  
101 MHz, CDCl<sub>3</sub>

—171.77

—140.09

—138.58

—132.56

—130.64

—130.02

—128.37

—81.95

—63.85

—41.24

—28.02

—21.24

10 200 190 180 170 160 150 140 130 120 110 100 90 80 70 60 50 40 30 20 10 0 -1

f1 (ppm)

S133

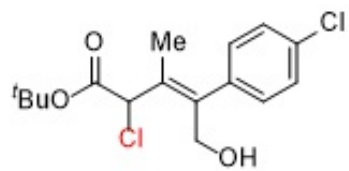

9

400 MHz, CDCl<sub>3</sub>

7.374  
7.367  
7.352  
7.340  
7.337  
7.317

6.116

4.060  
4.032  
3.944  
3.916

3.124

1.940

1.489

9.0 9.5 0.0 0.5 1.0 1.5 2.0 2.5 3.0 3.5 4.0 4.5 5.0 5.5 6.0 6.5 7.0 7.5 8.0 8.5 9.0 9.5

f1 (ppm)

S134

4.00

1.02

1.00

1.00

1.00

3.00

9.00

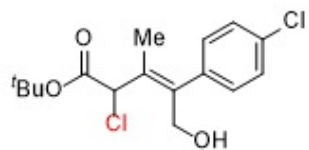

9

101 MHz, CDCl<sub>3</sub>

—166.34

—156.03

~139.66

~133.82

~128.69

~127.55

—118.27

~80.55

~79.35

—66.75

—28.23

—15.12

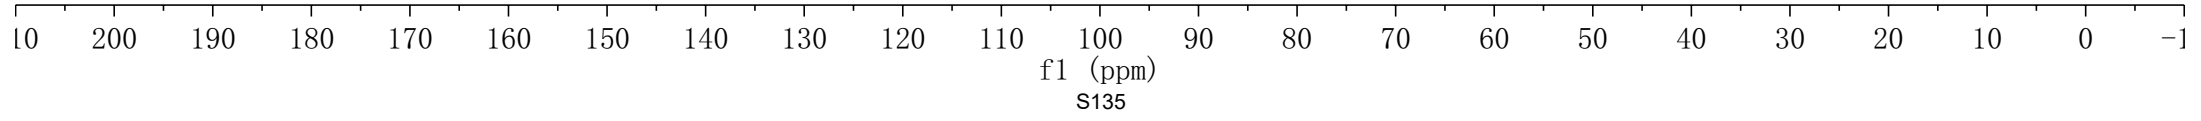

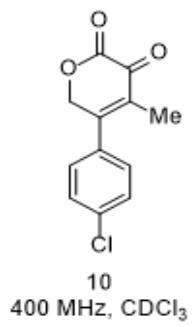

7.41  
7.40  
7.39  
7.38  
7.38  
7.37  
7.28  
7.27  
7.26  
7.26  
7.25  
7.24

4.25  
4.22  
4.19  
4.18  
4.16

2.04

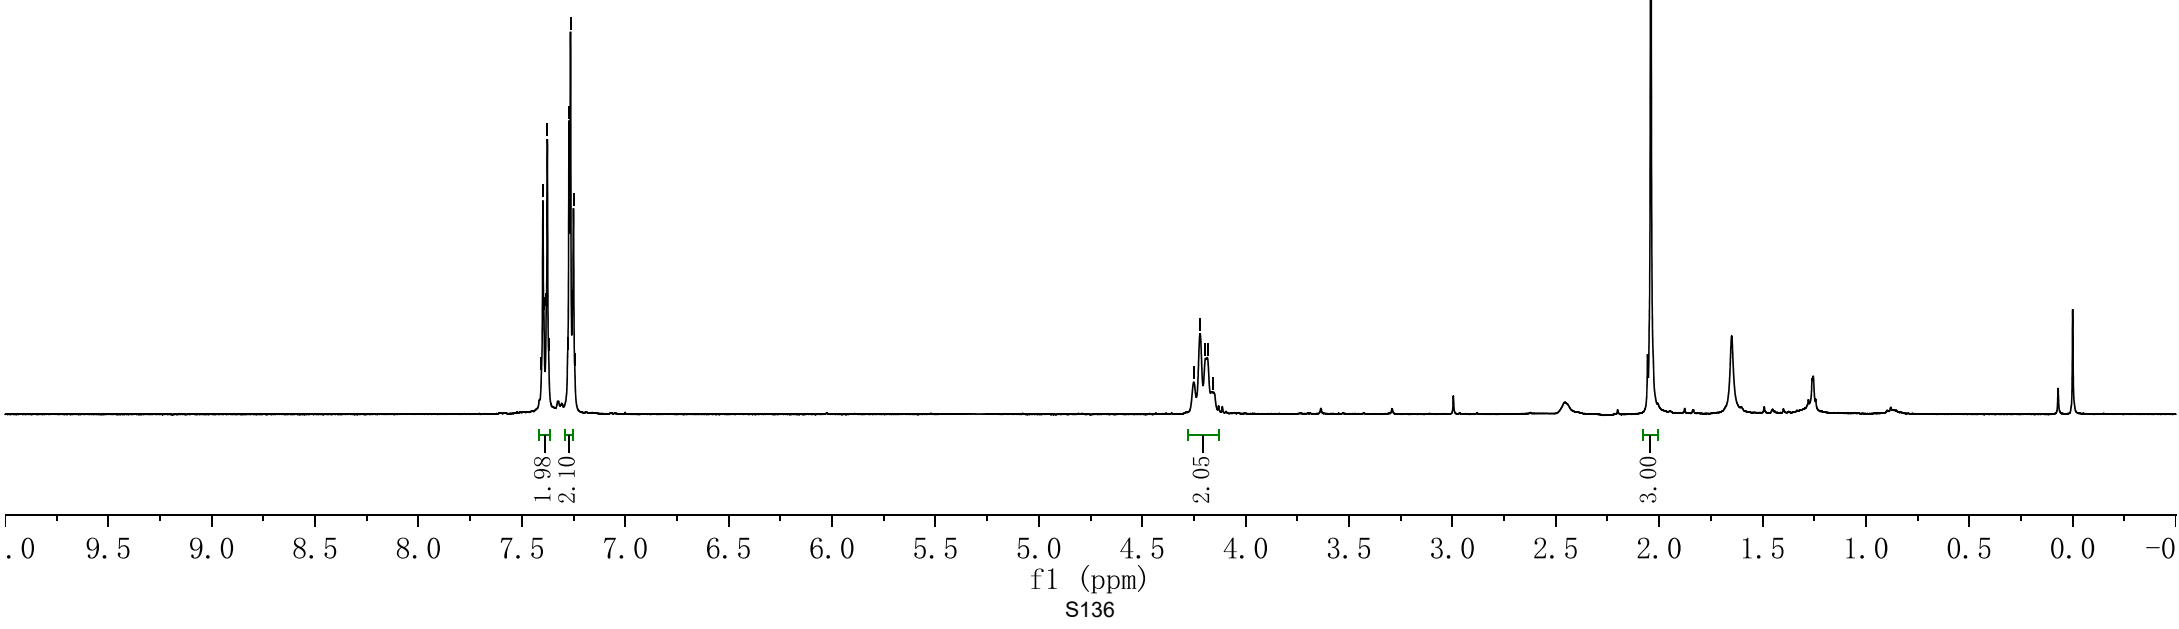

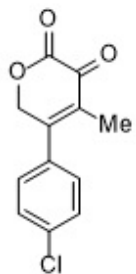

10  
101 MHz, CDCl<sub>3</sub>

~171.07  
~169.48

~135.38  
~133.06  
~129.38  
~126.74

—93.82

—84.71

—64.09

—16.66

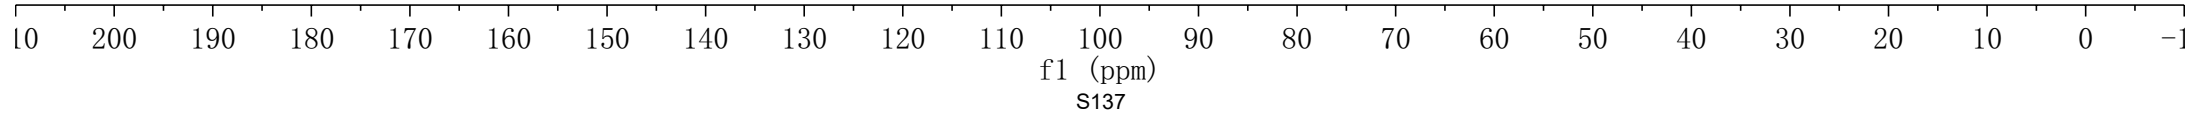

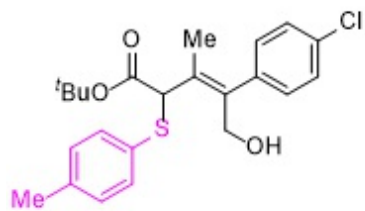

11  
400 MHz, CDCl<sub>3</sub>

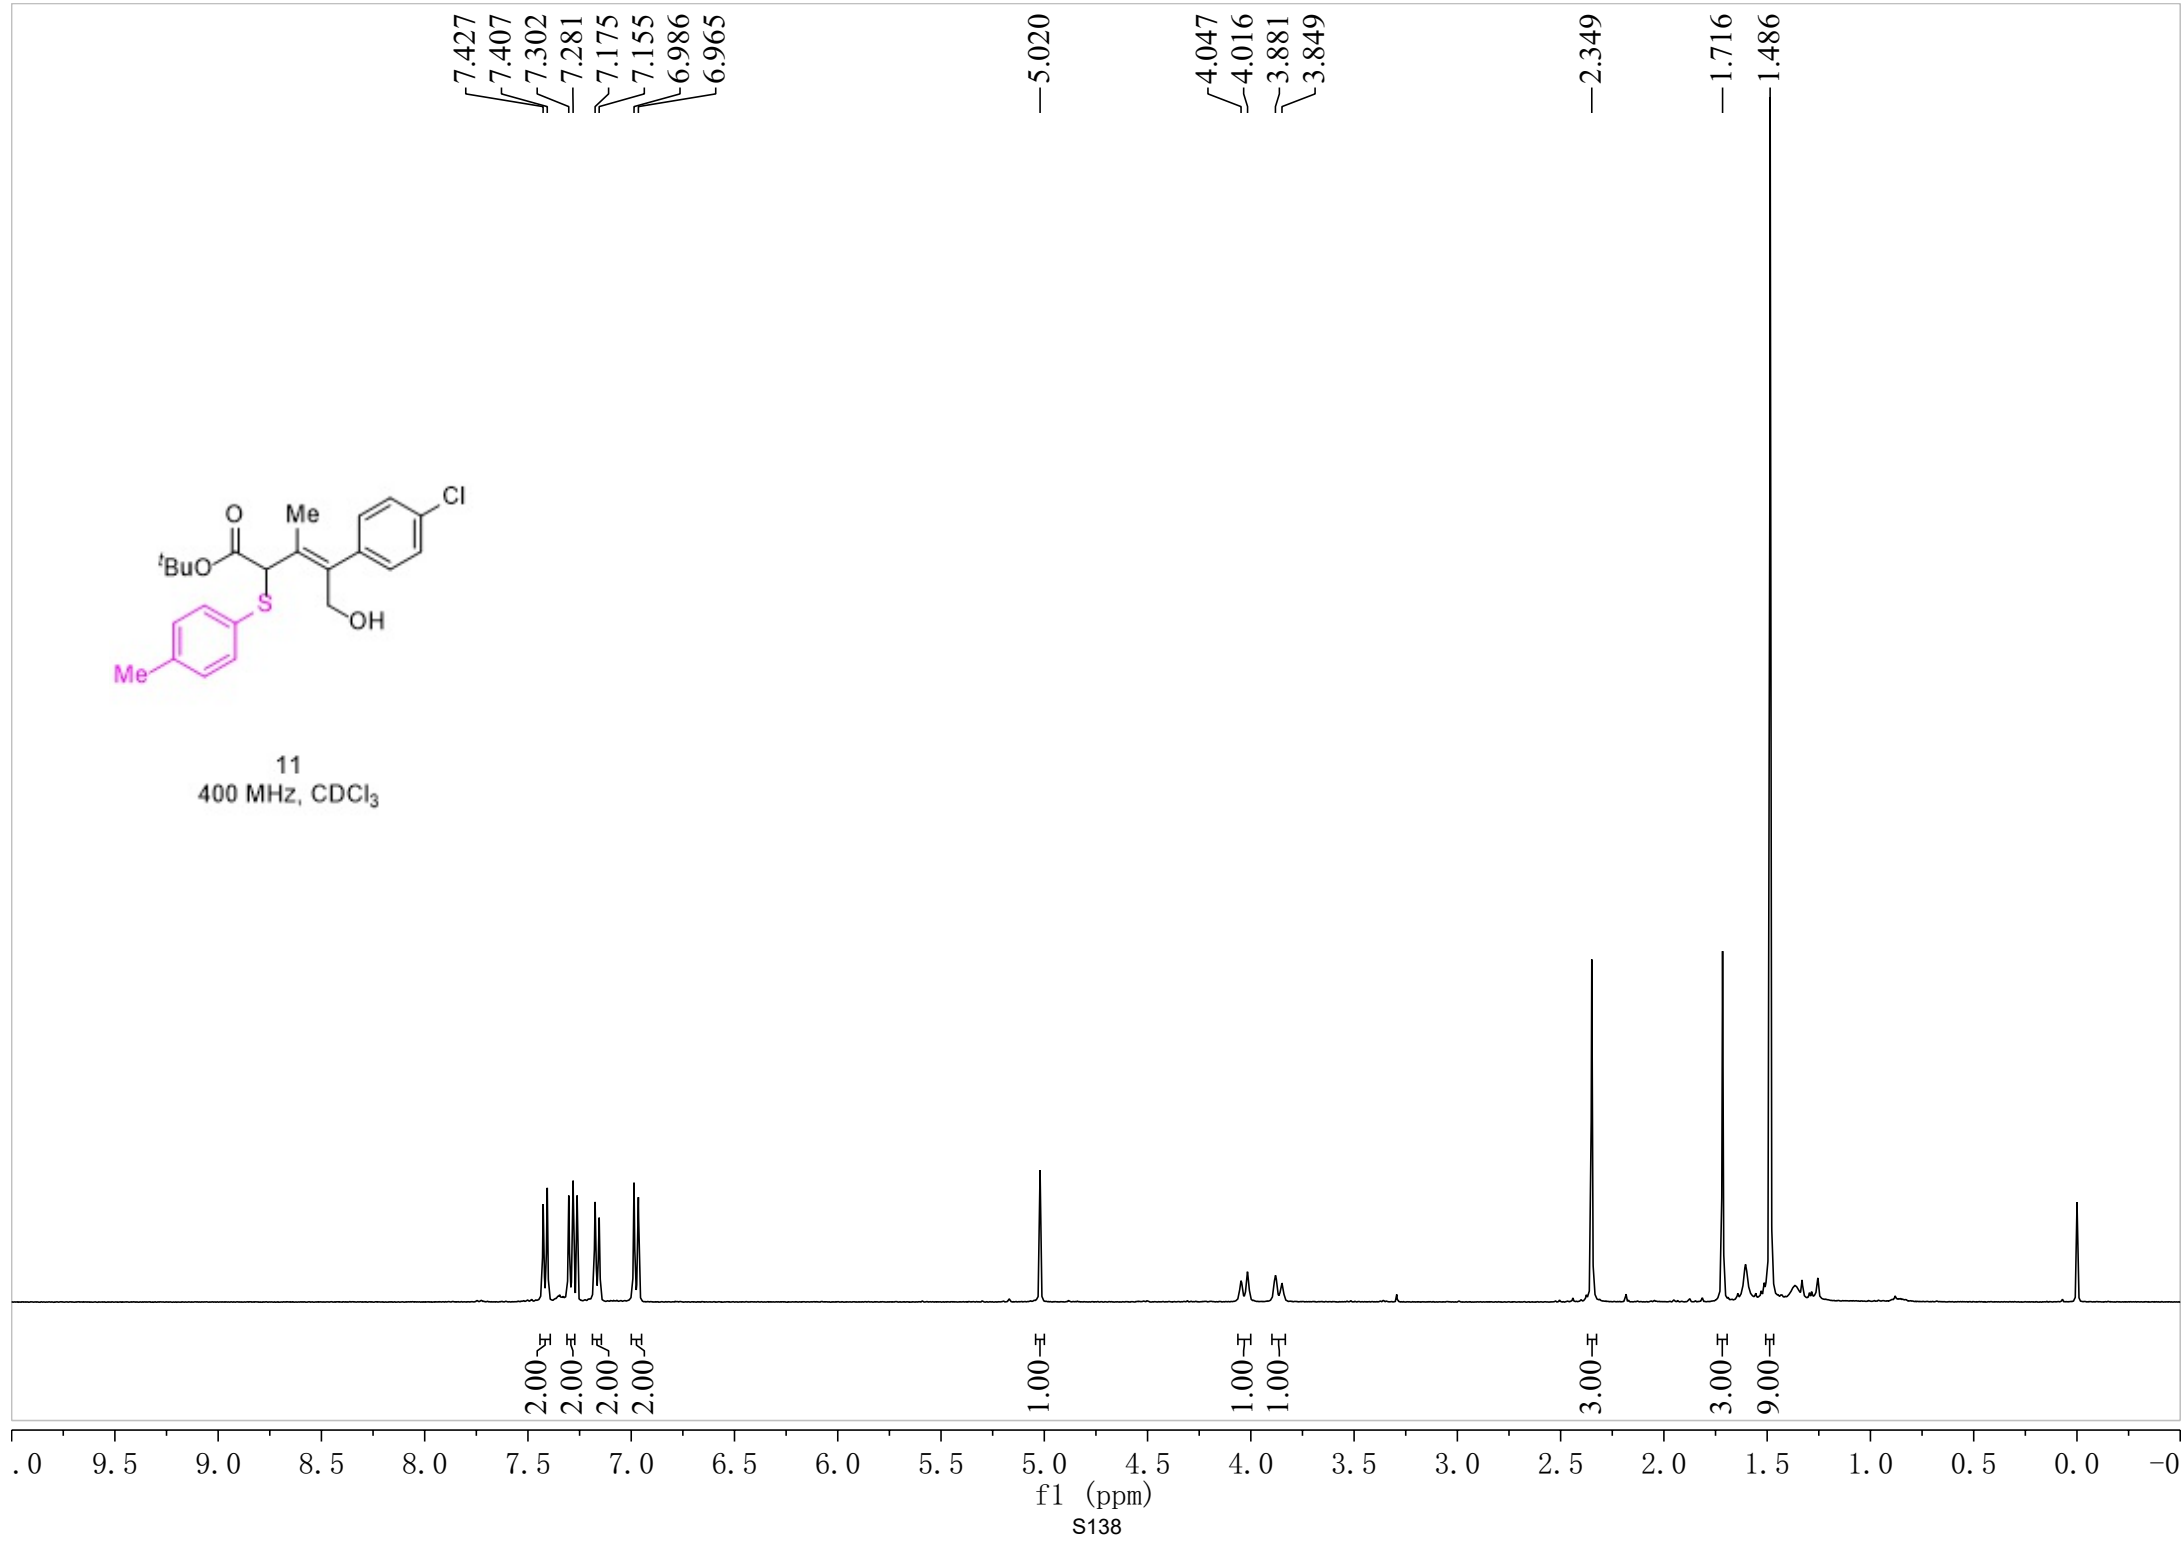

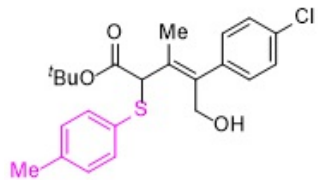

11  
101 MHz, CDCl<sub>3</sub>

—168.71

139.93

139.55

139.01

134.73

132.87

131.46

129.87

129.79

129.54

128.51

—83.25

—62.89

—56.89

27.88

21.22

16.32

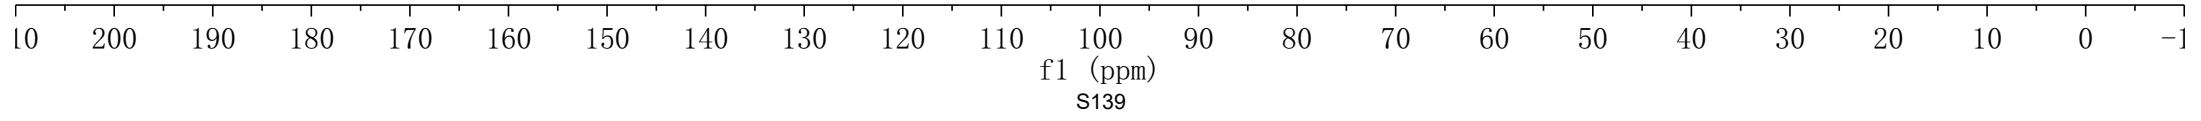

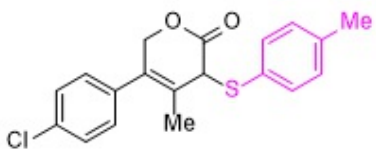

12  
400 MHz, CDCl<sub>3</sub>

7.508  
7.502  
7.497  
7.486  
7.482  
7.476  
7.368  
7.361  
7.356  
7.345  
7.340  
7.334  
7.186  
7.167  
7.000  
6.994  
6.989  
6.977  
6.973  
6.966  
4.546  
4.542  
4.539  
4.536  
4.532  
4.506  
4.502  
4.499  
4.496  
4.492  
4.279  
4.274  
4.269  
4.263  
4.257  
4.239  
4.234  
4.229  
4.223  
4.217  
3.987  
2.376

1.881

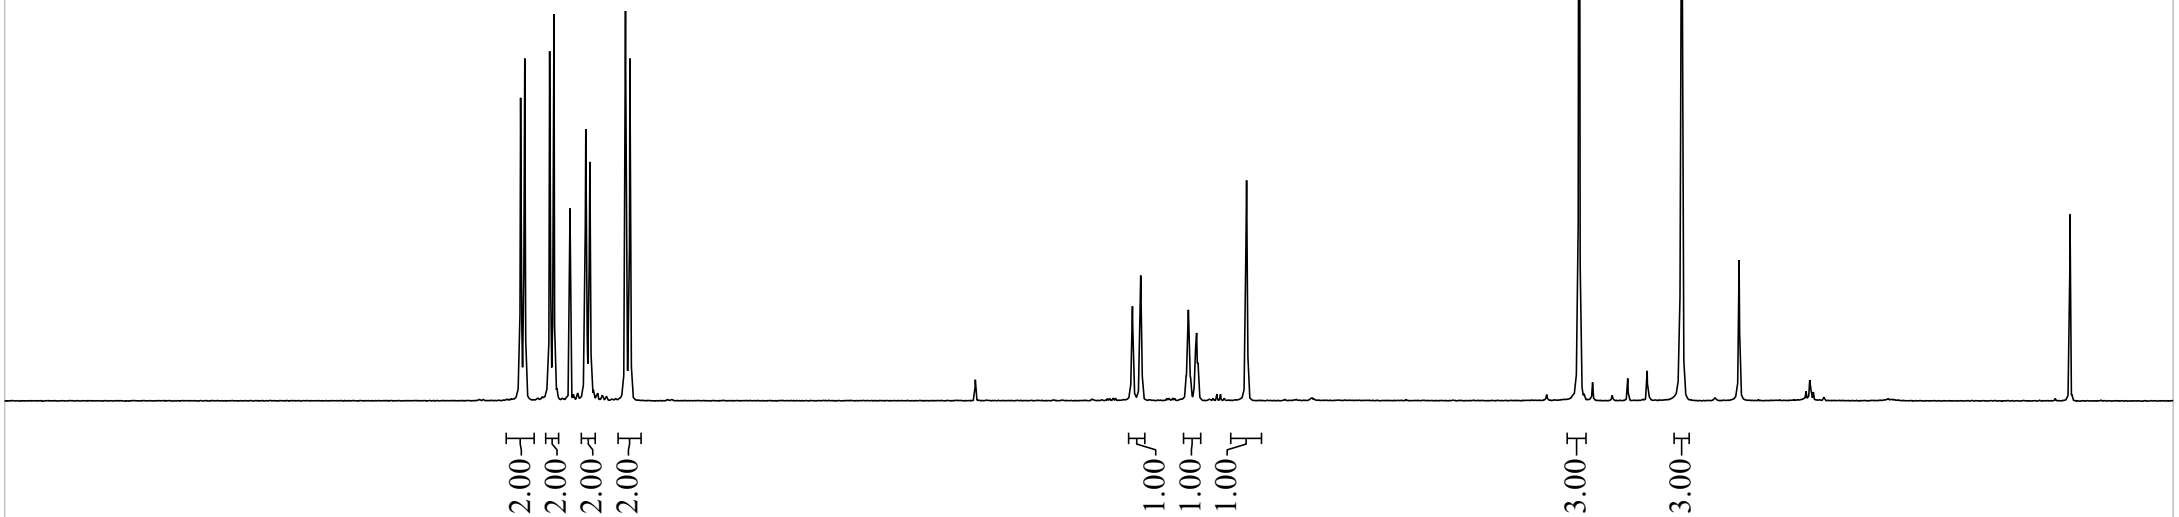

2.00  
2.00  
2.00  
2.00

1.00  
1.00  
1.00

3.00  
3.00

0.0 9.5 9.0 8.5 8.0 7.5 7.0 6.5 6.0 5.5 5.0 4.5 4.0 3.5 3.0 2.5 2.0 1.5 1.0 0.5 0.0 -0  
f1 (ppm)  
S140

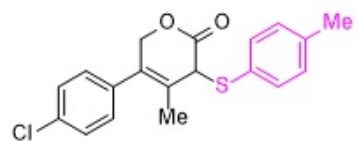

12  
101 MHz, CDCl<sub>3</sub>

—168.18

140.40

136.14

134.37

134.14

132.21

129.97

129.65

128.94

126.96

126.77

—71.31

—50.37

—21.38

—17.34

10 200 190 180 170 160 150 140 130 120 110 100 90 80 70 60 50 40 30 20 10 0 -1

f1 (ppm)

S141
